# Supplementary material for: Storm Anatol over Europe in December 1999: impacts on societal and energy infrastructure
Source: Copernicus journal article supplement (doi:10.5194/adgeo-56-141-2021), 2021-12-23
Supplement: Supplementary file 1 [file adgeo-56-141-2021-supplement.pdf]

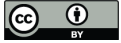

*Supplement of*

## **Storm Anatol over Europe in December 1999: impacts on societal and energy infrastructure**

**Anthony J. Kettle**

*Correspondence to:* Anthony J. Kettle ([ake3358@gmail.com](mailto:ake3358@gmail.com))

The copyright of individual parts of the supplement might differ from the article licence.

## SUMMARY OF SECTIONS IN THE SUPPLEMENT

SECTION I. Wind measurements across the period of the storm and trajectory

SECTION II. Wave measurements in the North Sea and Norwegian Sea

SECTION III. Quikscat image during the storm period.

SECTION IV. Radiosonde analysis across the period of Storm Anatol 3–4 December 1999

SECTION V. Thematic maps of storm impacts during Storm Anatol 3–4 December 1999

SECTION VI. Coastline modification on the west side of the German island of Sylt

SECTION VII. Power spectra of water level data from UK east coast tide gauge stations

SECTION VIII. Table of tide gauge stations used in the investigation

SECTION IX. Table of maritime accidents and incidents 3–4 December 1999

SECTION X. Tide gauge levelling differences and corrections to literature surge values

SECTION XI. Maximum amplitude of short period oscillations

SECTION XII. Range of water level variations across 10 minute intervals for the Germany data set

SECTION XIII. Return period of water level heights reported and inferred from literature reports

SECTION XIV. Timing of the tide, surge, extreme oscillations, and maritime incidents around the North Sea coast

SECTION XV. Literature source reports tabulated by theme and information content

SECTION I. Wind measurements across the period of the storm and trajectory

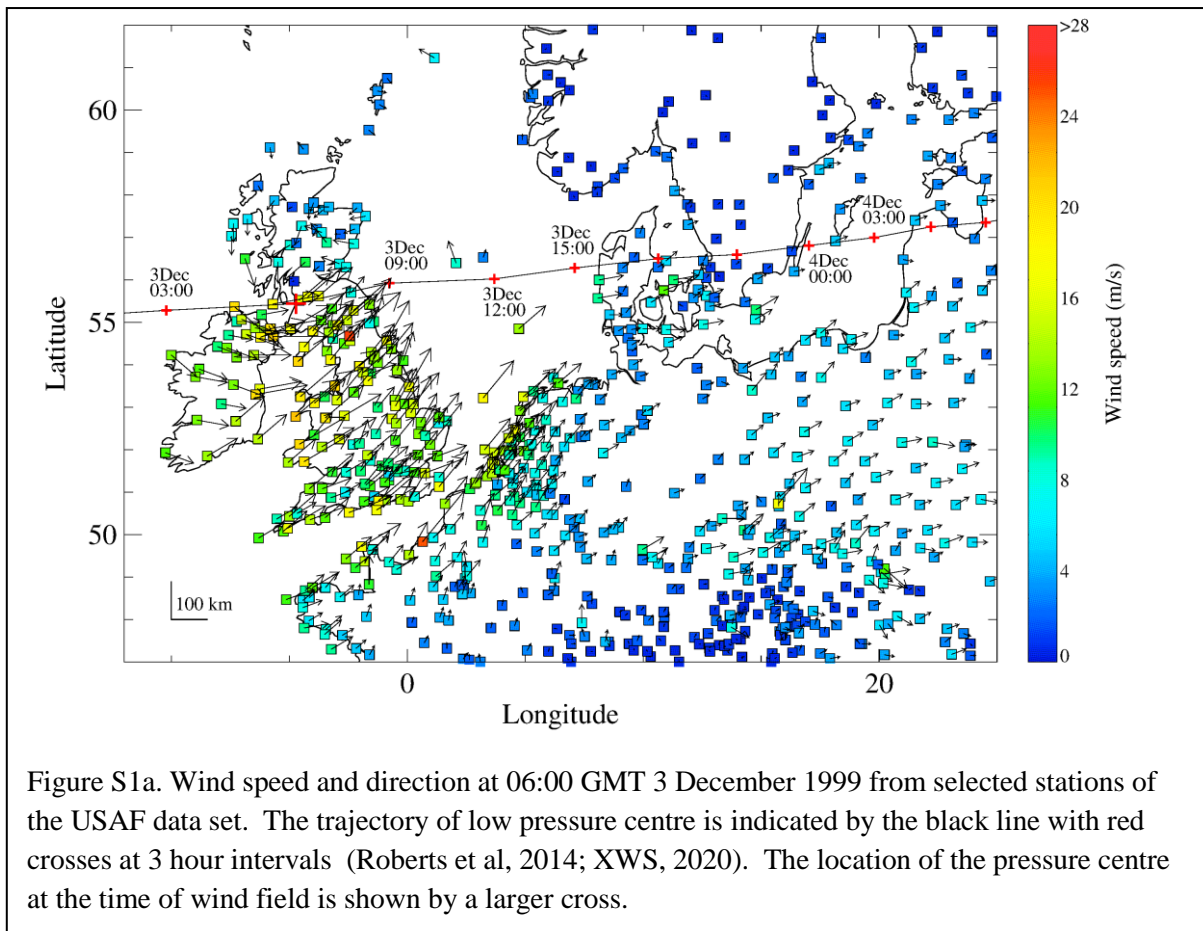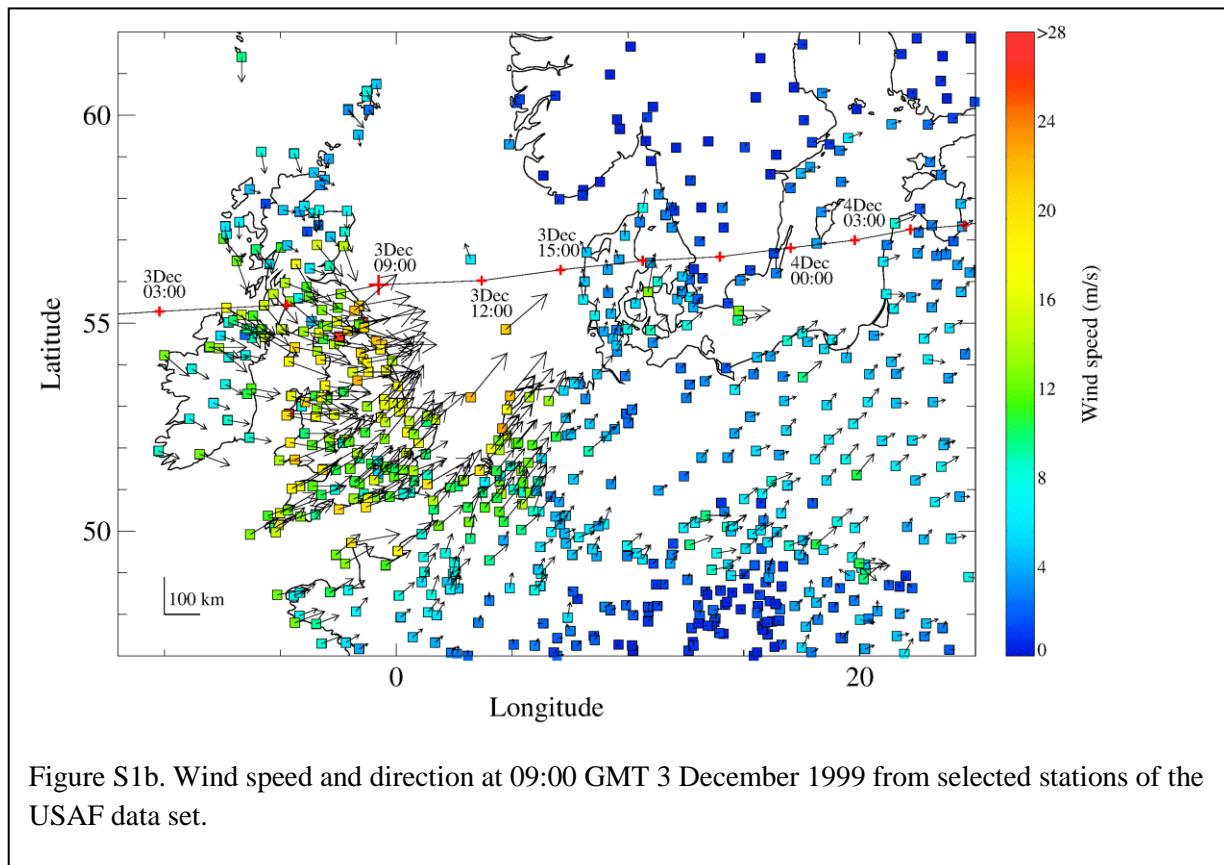

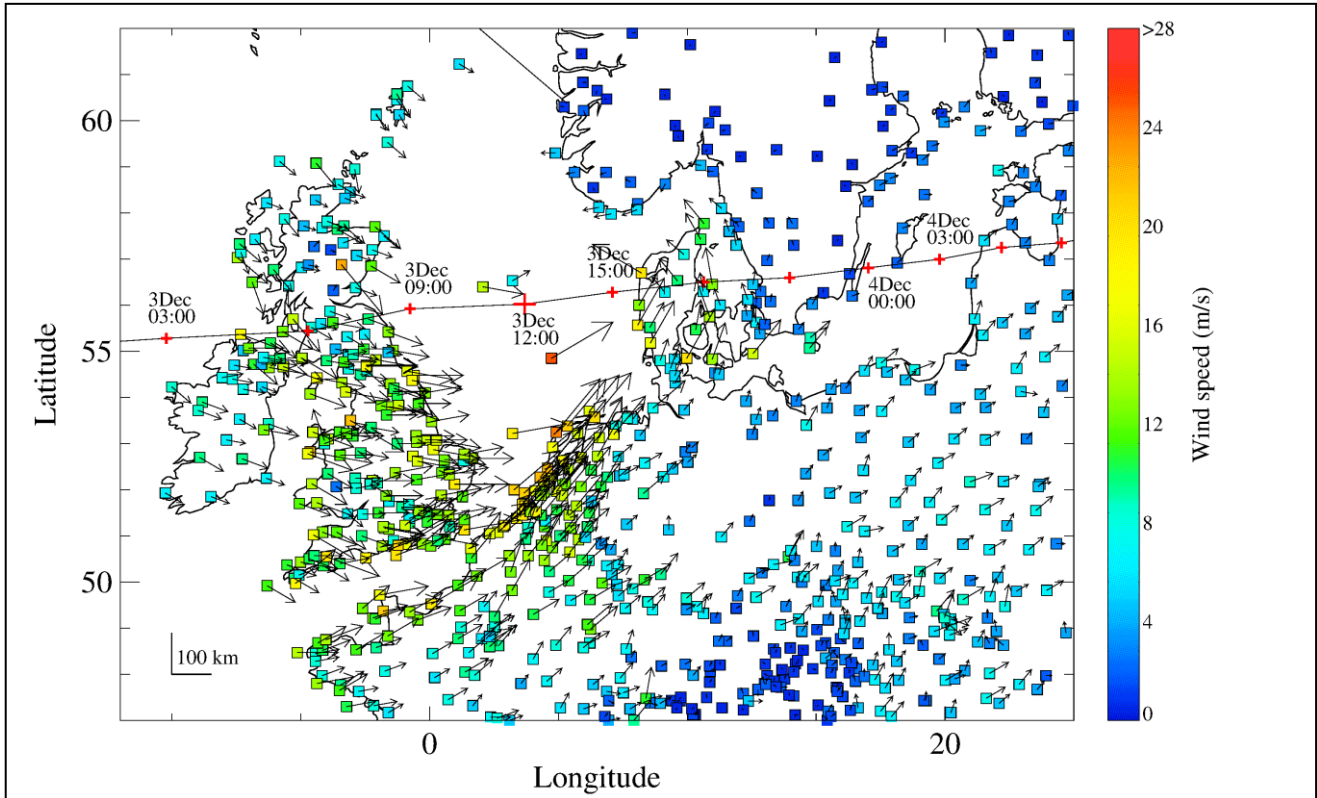

Figure S1c. Wind speed and direction at 12:00 GMT 3 December 1999 from selected stations of the USAF data set.

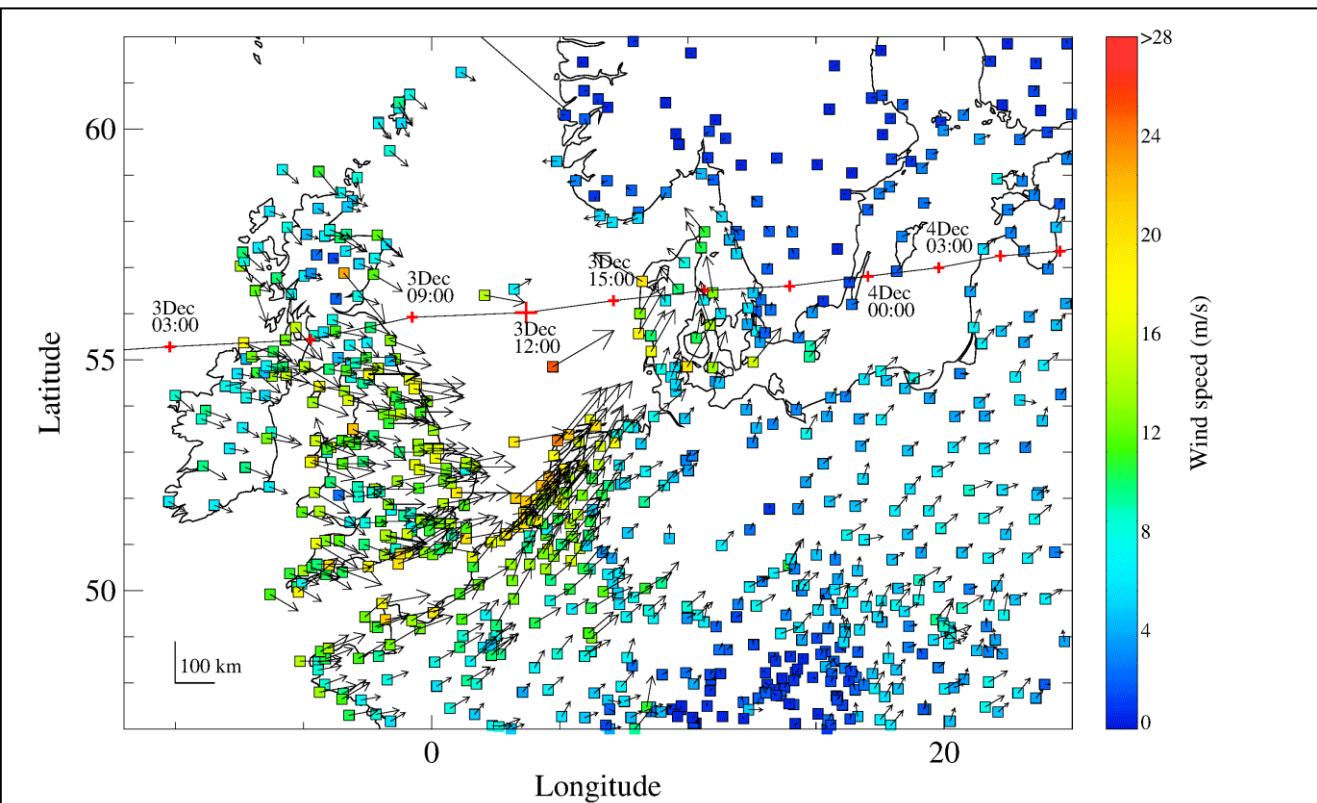

Figure S1d. Wind speed and direction at 15:00 GMT 3 December 1999 from selected stations of the USAF data set.

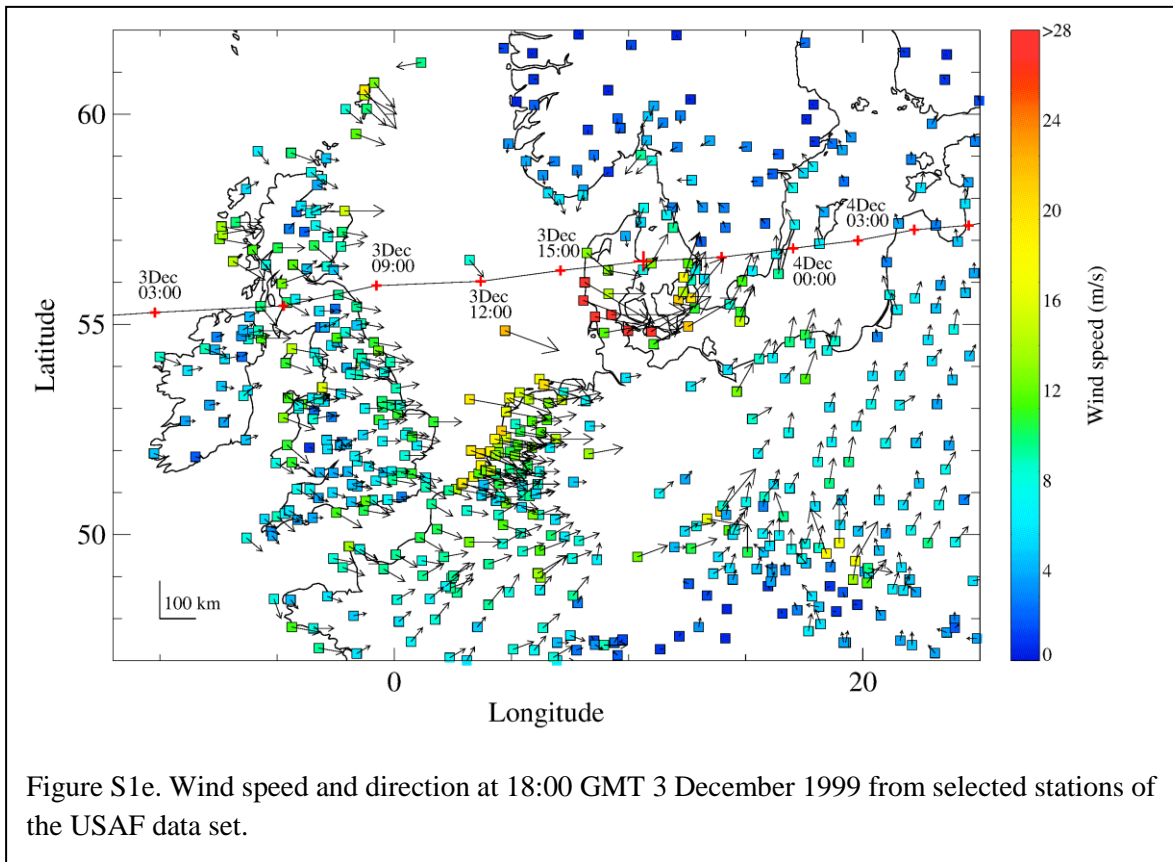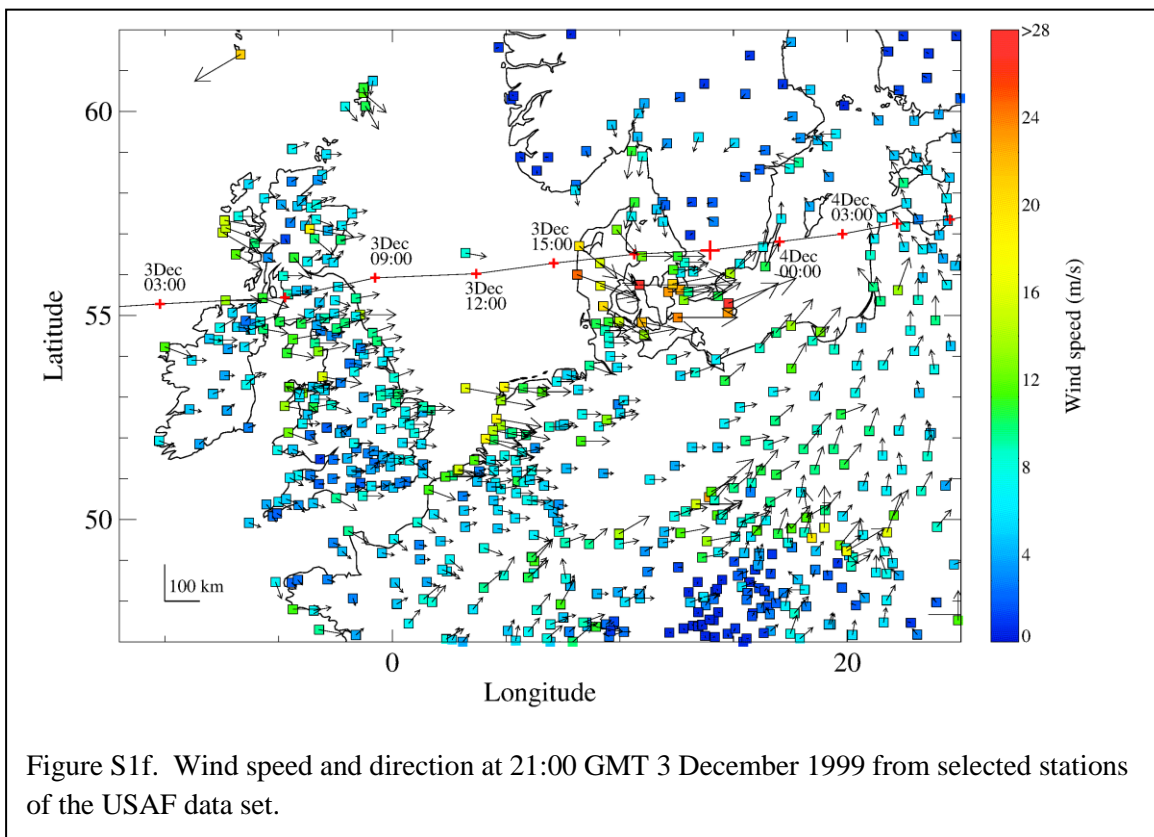

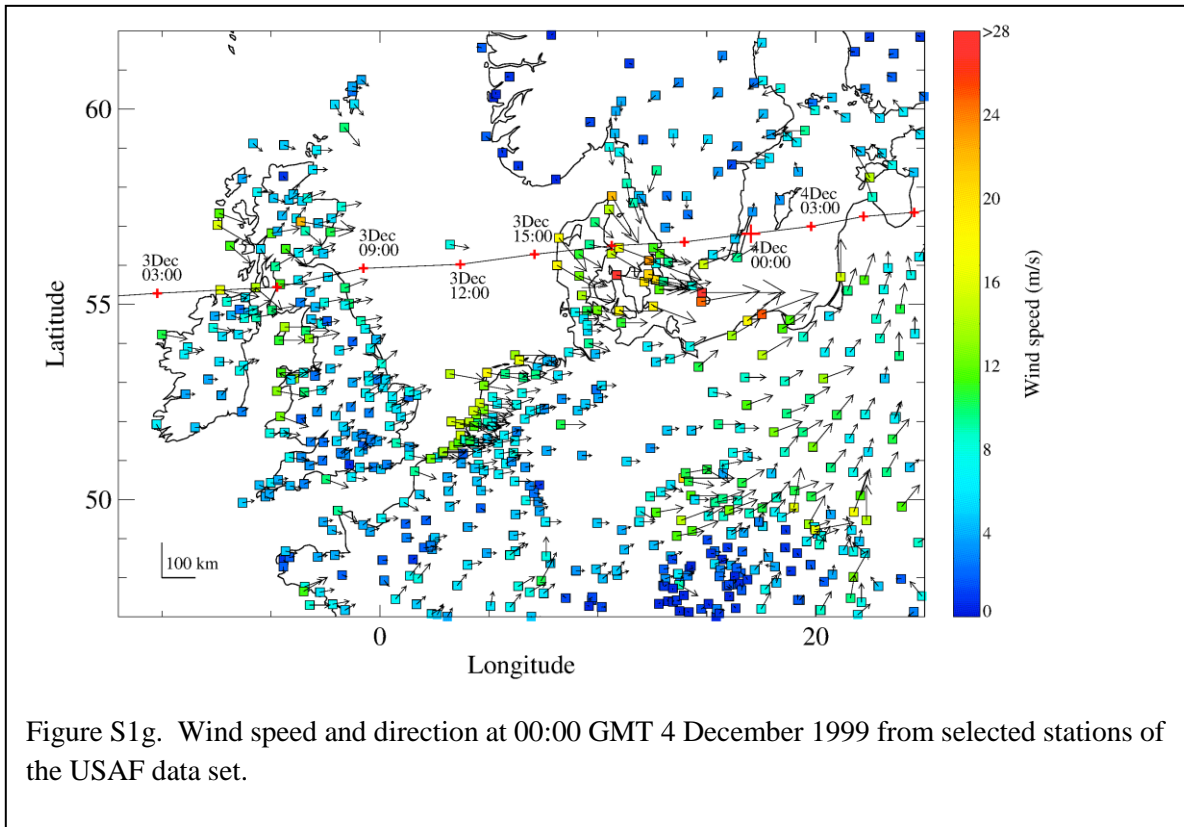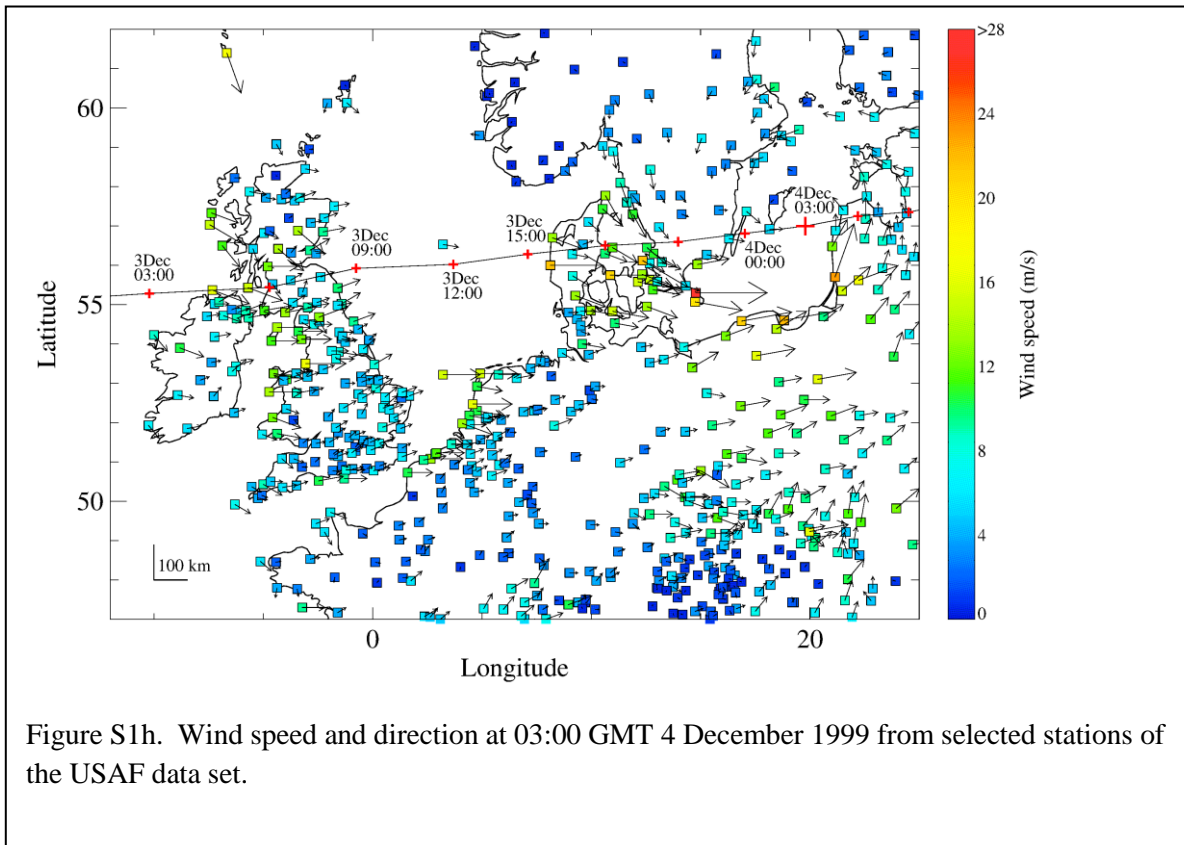

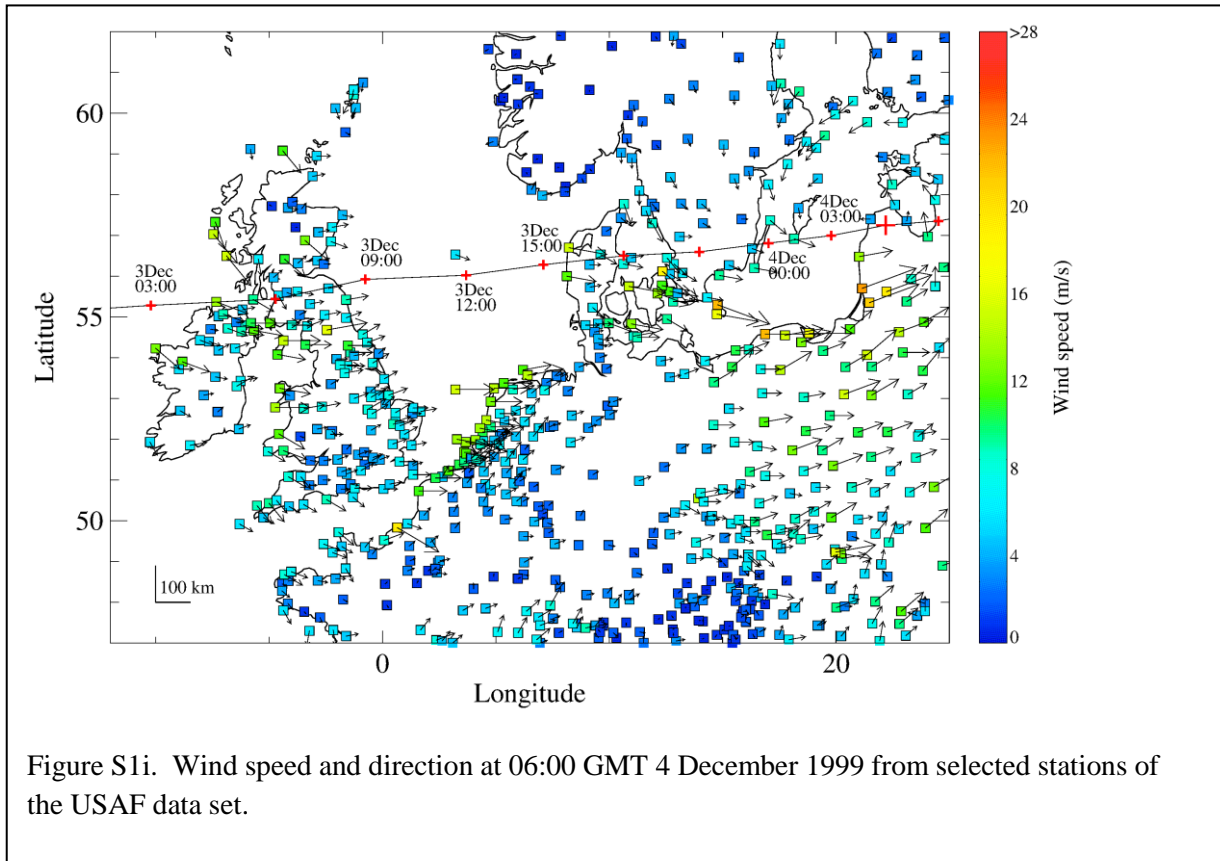

Figure S1i. Wind speed and direction at 06:00 GMT 4 December 1999 from selected stations of the USAF data set.

SECTION II. Wave measurements in the North Sea and Norwegian Sea

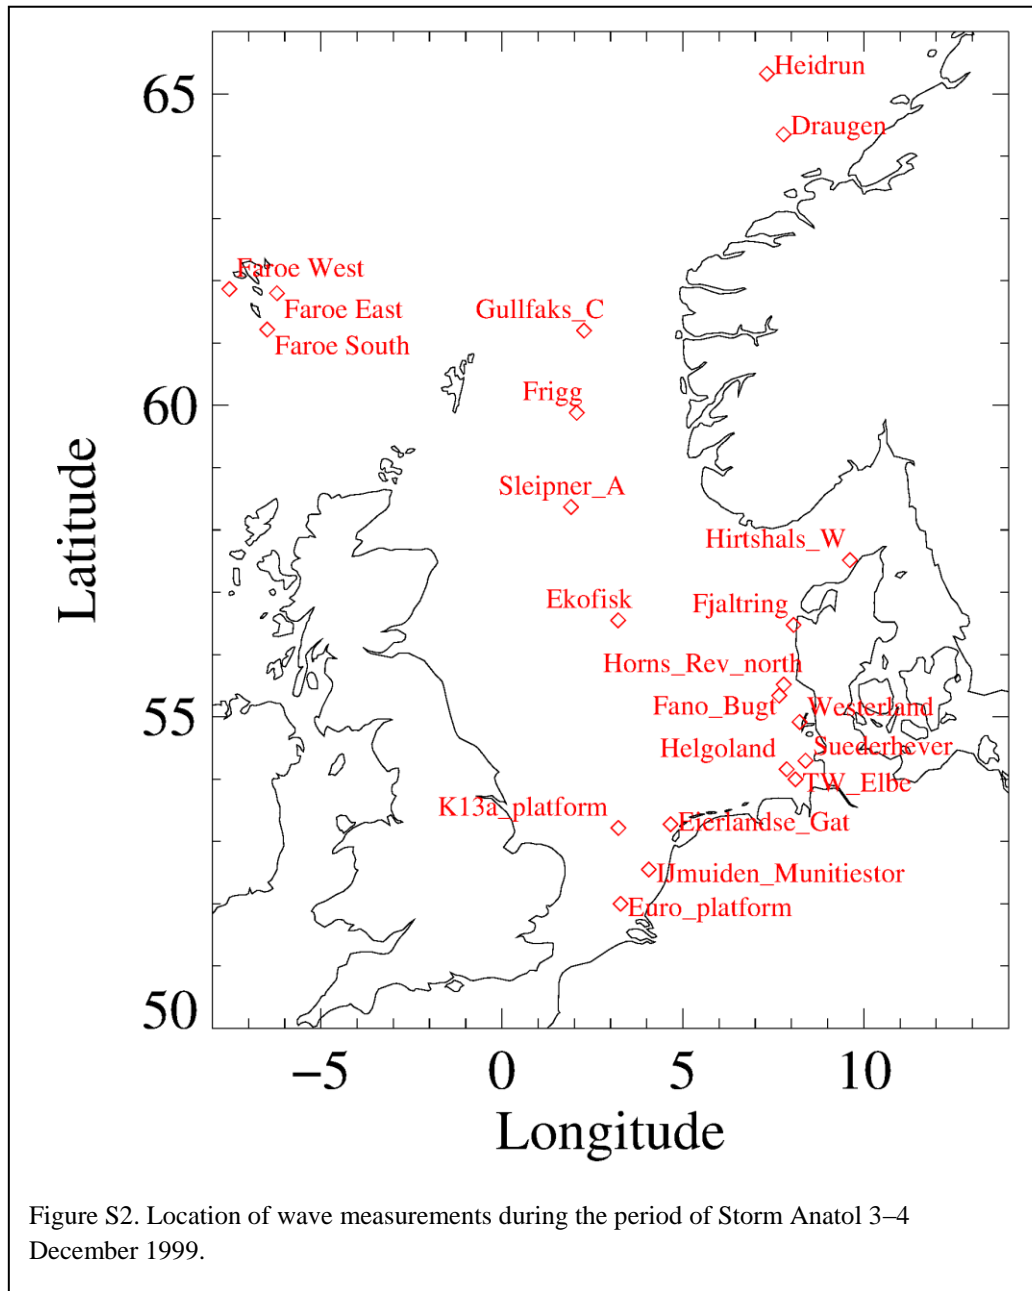

Figure S2. Location of wave measurements during the period of Storm Anatol 3–4 December 1999.



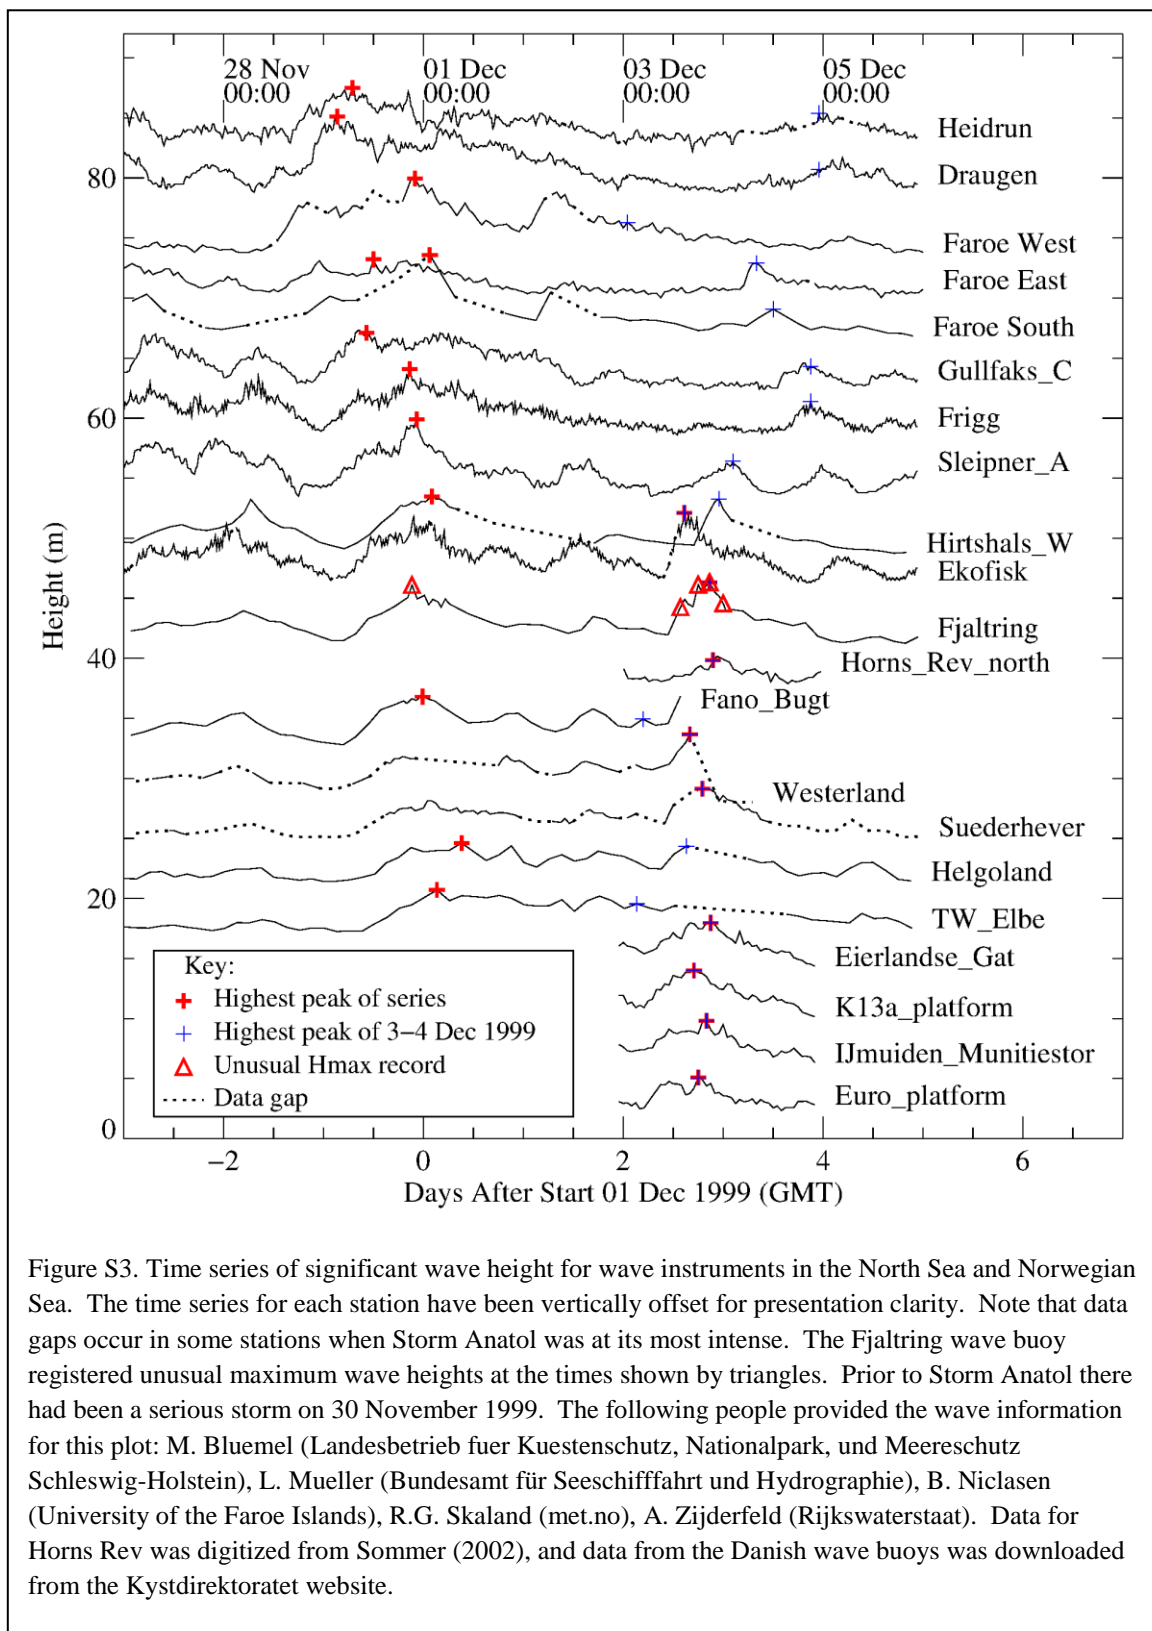

Figure S3. Time series of significant wave height for wave instruments in the North Sea and Norwegian Sea. The time series for each station have been vertically offset for presentation clarity. Note that data gaps occur in some stations when Storm Anatol was at its most intense. The Fjaltring wave buoy registered unusual maximum wave heights at the times shown by triangles. Prior to Storm Anatol there had been a serious storm on 30 November 1999. The following people provided the wave information for this plot: M. Bluemel (Landesbetrieb fuer Kuestenschutz, Nationalpark, und Meereschutz Schleswig-Holstein), L. Mueller (Bundesamt für Seeschifffahrt und Hydrographie), B. Niclasen (University of the Faroe Islands), R.G. Skaland (met.no), A. Zijderfeld (Rijkswaterstaat). Data for Horns Rev was digitized from Sommer (2002), and data from the Danish wave buoys was downloaded from the Kystdirektoratet website.

Table S1. Wave information from the North Sea and Norwegian Sea area for the period 28 November 1999 to 5 December 1999. Information is presented for the highest significant wave height over the full period and for the two day period of the storm 3–4 December 1999.

Wave information

| Station name<br>[1]  | La<br>nd<br>[2] | NNN<br>[3] | Date & time<br>series start<br>[4] | Date & time<br>series end<br>[5] | Median<br>$\Delta t$ (min)<br>[6] | Date/time peak<br>full series<br>[7] | Peak<br>(m)<br>[8] | Date/time peak<br>3–4Dec1999<br>[9] | Peak<br>(m)<br>[10] |
|----------------------|-----------------|------------|------------------------------------|----------------------------------|-----------------------------------|--------------------------------------|--------------------|-------------------------------------|---------------------|
| Eierlandse_Gat       | NE              | 48         | 02/12/1999<br>23:00                | 04/12/1999<br>22:00              | 60.0                              | 03/12/1999<br>21:00                  | 6.0                | 03/12/1999<br>21:00                 | 6.0                 |
| Euro_platform        | NE              | 48         | 02/12/1999<br>23:00                | 04/12/1999<br>22:00              | 60.0                              | 03/12/1999<br>18:00                  | 5.1                | 03/12/1999<br>18:00                 | 5.1                 |
| Ijmuiden_Munitiestor | NE              | 48         | 02/12/1999<br>23:00                | 04/12/1999<br>22:00              | 60.0                              | 03/12/1999<br>20:00                  | 5.8                | 03/12/1999<br>20:00                 | 5.8                 |
| K13a_platform        | NE              | 48         | 02/12/1999<br>23:00                | 04/12/1999<br>22:00              | 60.0                              | 03/12/1999<br>17:00                  | 6.0                | 03/12/1999<br>17:00                 | 6.0                 |
| Helgoland            | DE              | 59         | 28/11/1999<br>00:07                | 05/12/1999<br>21:06              | 182.0                             | 01/12/1999<br>09:10                  | 4.6                | 03/12/1999<br>15:09                 | 4.3                 |
| TW_Elbe              | DE              | 56         | 28/11/1999<br>00:11                | 05/12/1999<br>21:19              | 180.0                             | 01/12/1999<br>03:14                  | 4.7                | 03/12/1999<br>03:16                 | 3.5                 |
| Fano_Bugt            | DK              | 50         | 28/11/1999<br>01:45                | 03/12/1999<br>13:45              | 180.0                             | 30/11/1999<br>23:45                  | 4.8                | 03/12/1999<br>04:45                 | 2.9                 |
| Fjaltring            | DK              | 79         | 28/11/1999<br>01:45                | 05/12/1999<br>22:45              | 180.0                             | 03/12/1999<br>20:45                  | 6.3                | 03/12/1999<br>20:45                 | 6.3                 |
| Hirtshals_W          | DK              | 64         | 27/11/1999<br>23:00                | 05/12/1999<br>20:00              | 180.0                             | 01/12/1999<br>02:00                  | 5.5                | 03/12/1999<br>23:00                 | 5.3                 |
| Horns_Rev_north      | DK              | 48         | 03/12/1999<br>00:07                | 04/12/1999<br>23:26              | 58.5                              | 03/12/1999<br>21:35                  | 3.8                | 03/12/1999<br>21:35                 | 3.8                 |
| Ekofisk              | NO              | 562        | 27/11/1999<br>23:00                | 05/12/1999<br>22:40              | 20.0                              | 03/12/1999<br>14:40                  | 8.1                | 03/12/1999<br>14:40                 | 8.1                 |
| Draugen              | NO              | 573        | 27/11/1999<br>23:00                | 05/12/1999<br>22:40              | 20.0                              | 30/11/1999<br>03:20                  | 9.1                | 05/12/1999<br>00:00                 | 4.8                 |
| Frigg                | NO              | 576        | 27/11/1999<br>23:00                | 05/12/1999<br>22:40              | 20.0                              | 30/11/1999<br>20:40                  | 8.1                | 04/12/1999<br>21:00                 | 5.4                 |
| Gullfaks_C           | NO              | 576        | 27/11/1999<br>23:00                | 05/12/1999<br>22:40              | 20.0                              | 30/11/1999<br>10:20                  | 7.1                | 04/12/1999<br>21:00                 | 4.3                 |
| Heidrun              | NO              | 529        | 27/11/1999<br>23:00                | 05/12/1999<br>22:40              | 20.0                              | 30/11/1999<br>07:00                  | 7.5                | 04/12/1999<br>23:00                 | 5.4                 |
| Sleipner_A           | NO              | 574        | 27/11/1999<br>23:00                | 05/12/1999<br>22:40              | 20.0                              | 30/11/1999<br>22:20                  | 7.9                | 04/12/1999<br>02:20                 | 4.4                 |
| Suederhever          | DE              | 92         | 28/11/1999<br>03:00                | 05/12/1999<br>23:00              | 60.0                              | 03/12/1999<br>19:00                  | 5.1                | 03/12/1999<br>19:00                 | 5.1                 |
| Westerland           | DE              | 54         | 28/11/1999<br>03:00                | 04/12/1999<br>07:00              | 120.0                             | 03/12/1999<br>16:00                  | 5.7                | 03/12/1999<br>16:00                 | 5.7                 |
| Faroe East           | FA              | 192        | 28/11/1999<br>00:00                | 06/12/1999<br>00:00              | 60.0                              | 30/11/1999<br>12:00                  | 5.2                | 04/12/1999<br>08:00                 | 4.9                 |
| Faroe South          | FA              | 40         | 28/11/1999<br>02:01                | 05/12/1999<br>21:31              | 210.0                             | 01/12/1999<br>01:32                  | 9.6                | 04/12/1999<br>12:02                 | 5.1                 |
| Faroe West           | FA              | 172        | 28/11/1999<br>00:00                | 06/12/1999<br>00:00              | 60.0                              | 30/11/1999<br>22:00                  | 8.0                | 03/12/1999<br>01:00                 | 4.3                 |

Notes:

- [1] Wave measuring station name
- [2] Operating country
- [3] Number of data points in time series
- [4] Start date and time of time series (GMT)
- [5] End date and time of time series (GMT)
- [6] Median time interval
- [7] Date and time of peak of full time series (GMT)
- [8] Peak significant wave height of full time series.
- [9] Date and time of peak of 2 d time series during Storm Anatol 3–4 December 1999.
- [10] Peak significant wave height of 2 d time series during Storm Anatol 3–4 December 1999.

SECTION III. Quikscat image during the storm period.

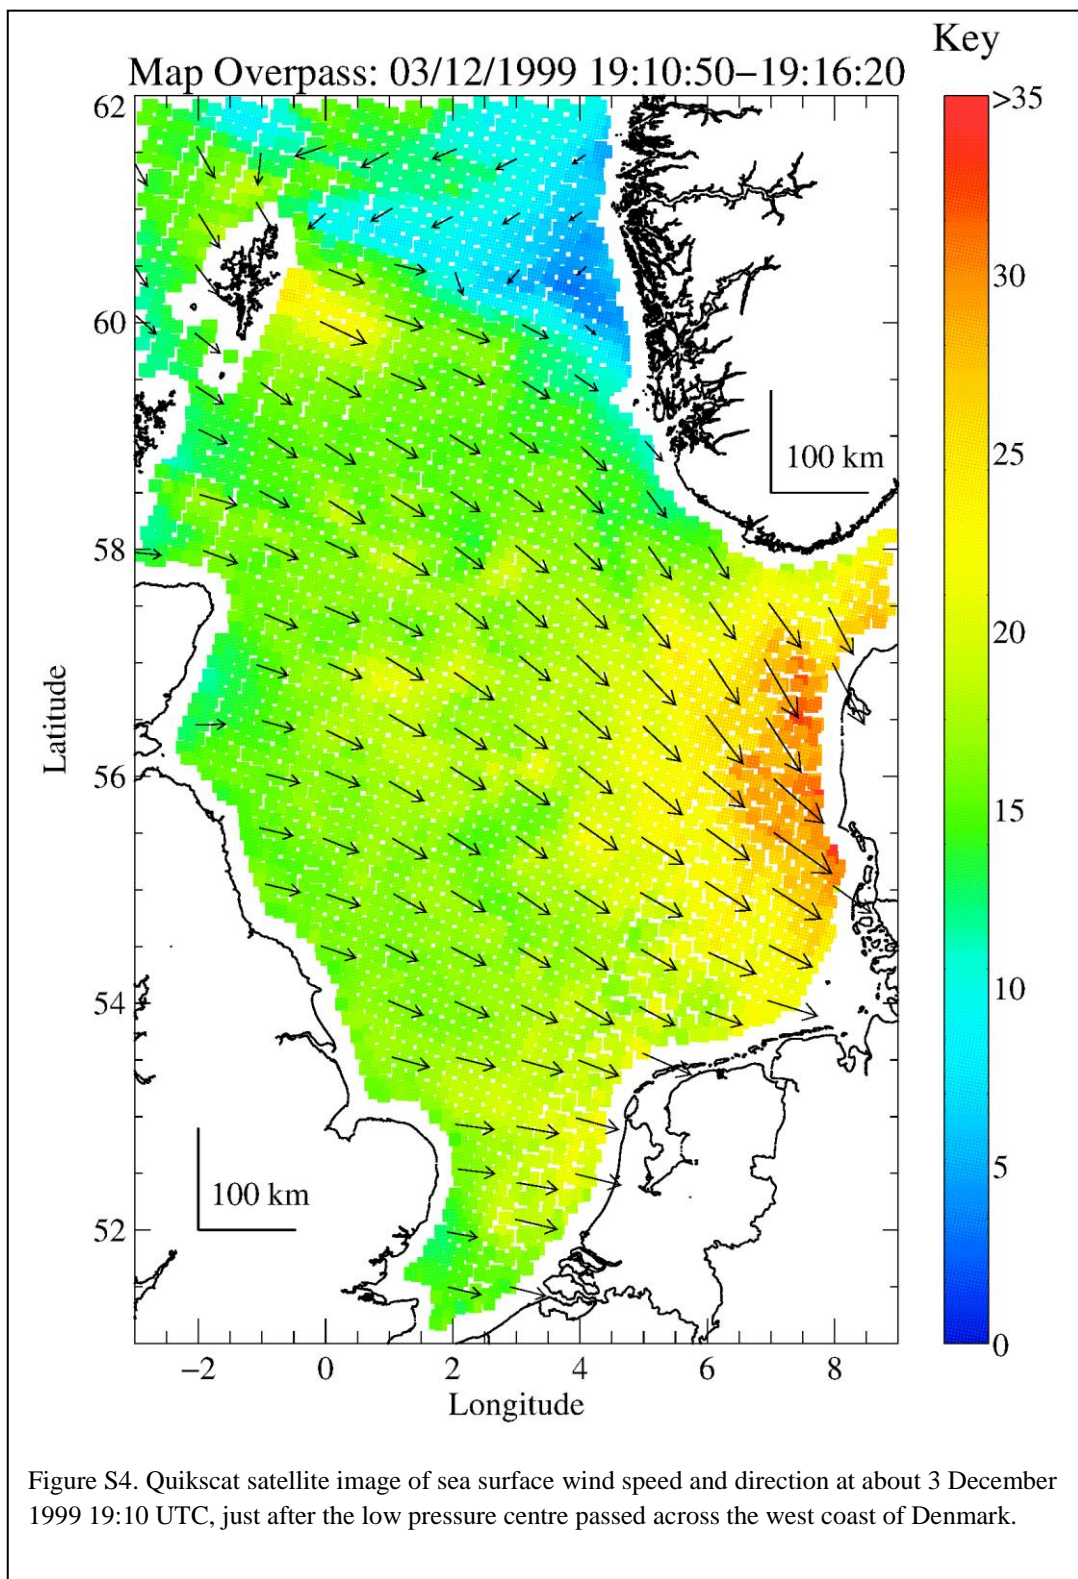

#### SECTION IV. Radiosonde analysis across the period of Storm Anatol 3–4 December 1999

Explanation: Radiosonde data for Europe were downloaded from the University of Wyoming archival website at <http://weather.uwyo.edu/upperair/sounding.html>. The locations of the stations are shown in Fig. S5a. The data for the time period 20 November 1999–10 December 1999 were selected for analysis. Most of the stations had radiosonde ascents at 12 h intervals, although some had data at 6 h intervals. The original data sets included primary profile measurements (pressure, height, temperature, dew point temperature, wind speed, and wind direction), derived profile measurements (relative humidity, mixing ratio, and potential temperature) and a number of diagnostic values including convective available potential energy (CAPE) and lifted condensation level. Of these, height and wind speed data are presented here. Time series of vertical profiles of wind speed are shown in Fig. S5b–d for three stations showing the highest upper tropospheric wind speeds at the time of Storm Anatol on 3–4 December 1999 (Nottingham, Bergen in northern Germany, and Koebenhavn). Of these, the unusually high wind speed features of Bergen and Koebenhavn have been previously pointed out by DWD (2000), and these stations are near the path greatest gust damage along central and southern Denmark. The upper tropospheric wind speeds of ~80 m/s would have marked this storm as a category 5 hurricane if the wind speeds had been registered as a 10 minute sustained average at 10 m height above the ground surface. Latitude-height profiles of wind speed are shown for stations in central and western Europe at 3 December 1999 at 12:00 UTC (Fig. 5e) and 4 December 1999 at 00:00 UTC (Fig. 5f). The figures emphasize the presence of high wind speed jets over Denmark and northern Germany at the time of the storm.

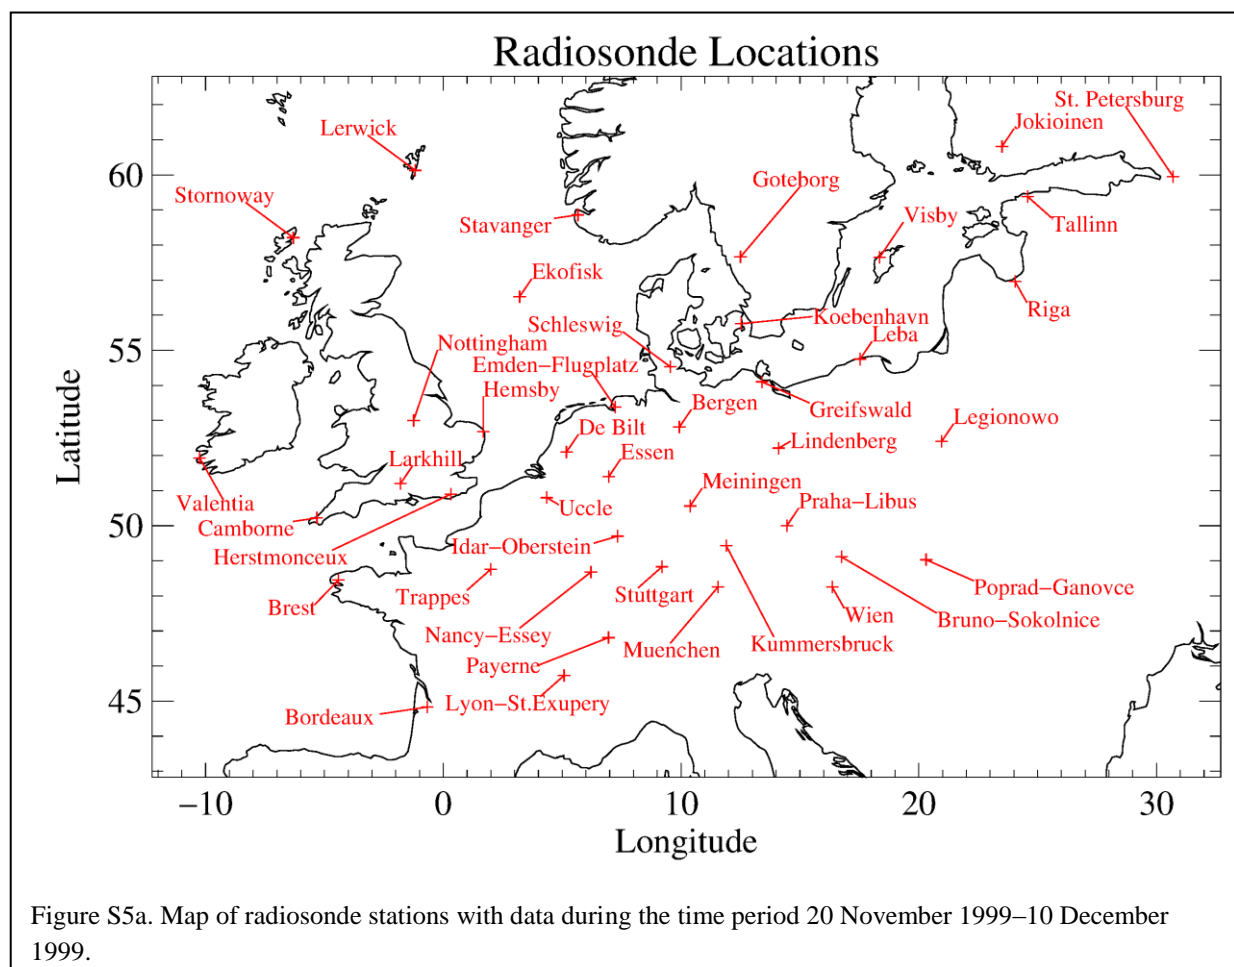

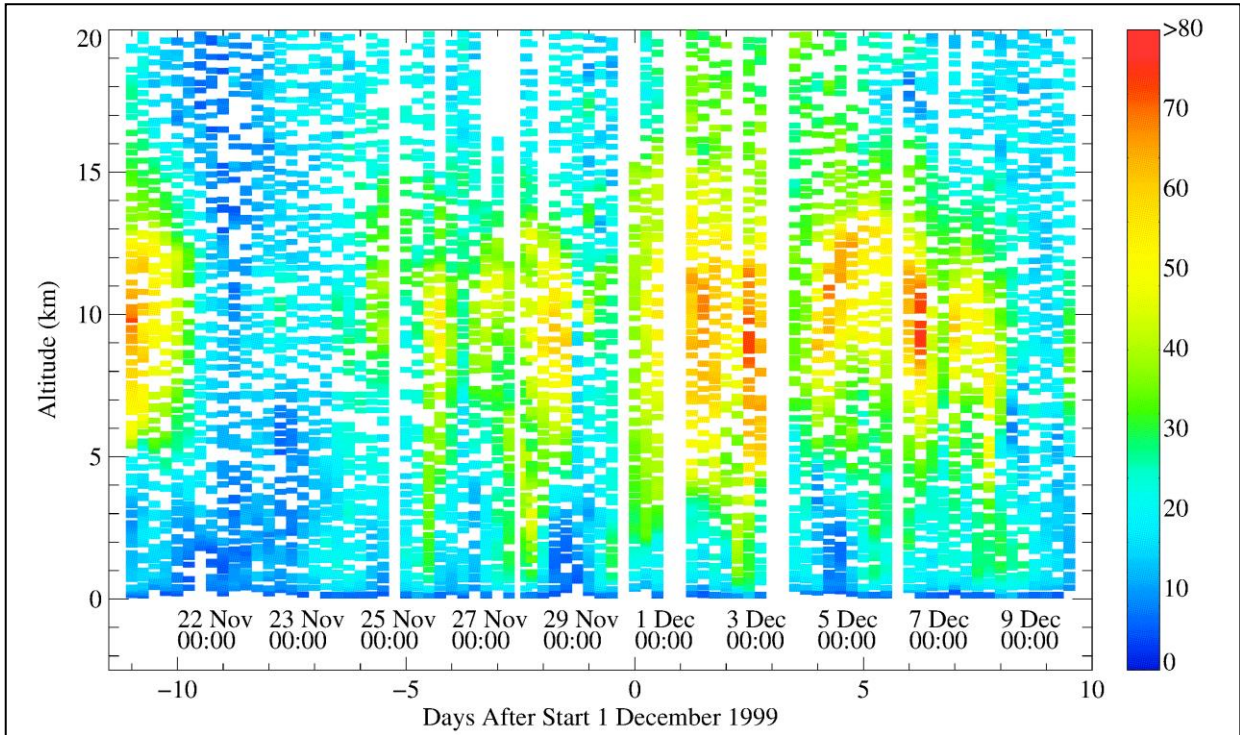

Figure S5b. Time series of vertical profiles of wind speed for the radiosonde station at Nottingham for the period 20 November 1999–10 December 1999.

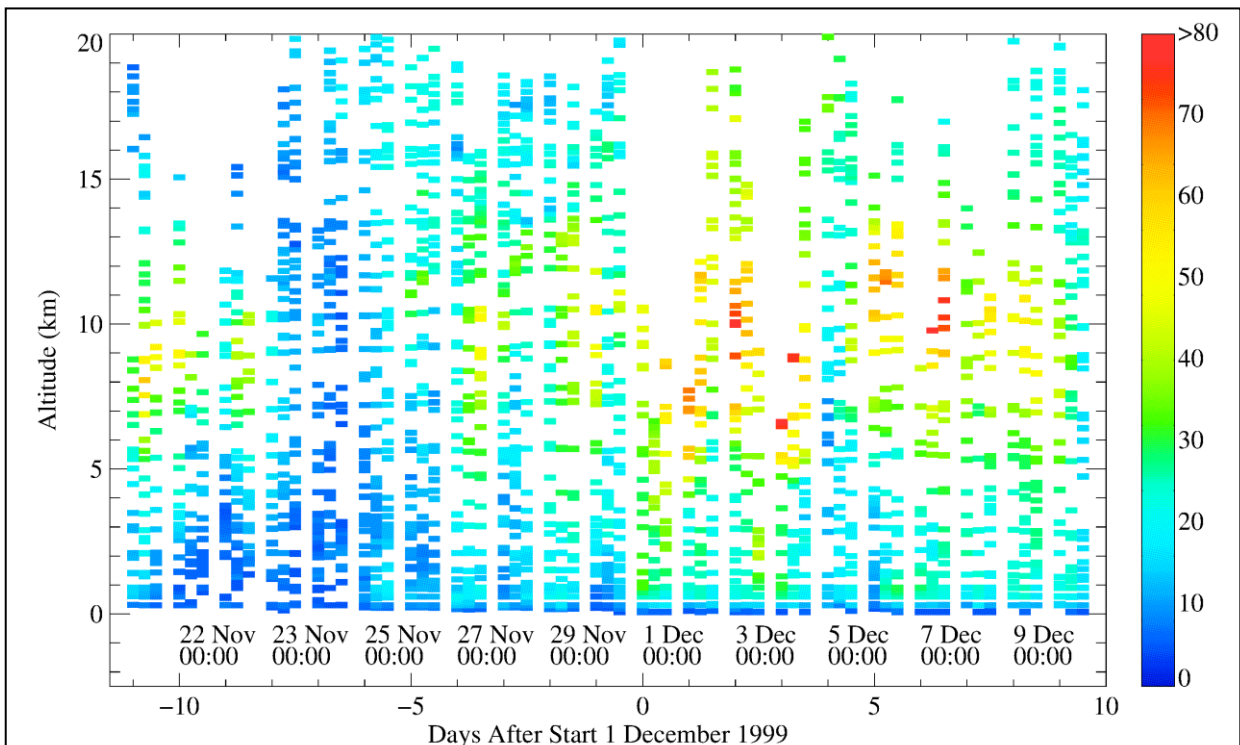

Figure S5c. Time series of vertical profiles of wind speed for the radiosonde station at Bergen in northern Germany for the period 20 November 1999–10 December 1999.

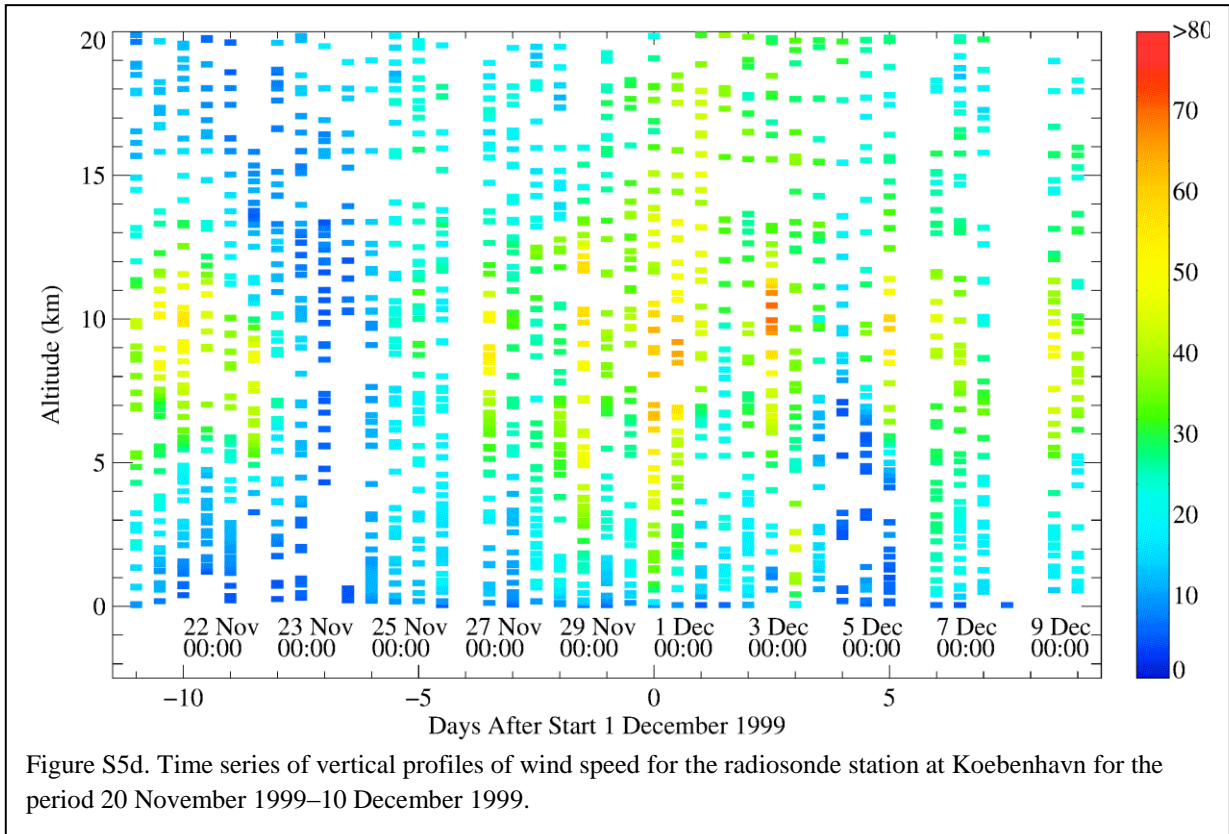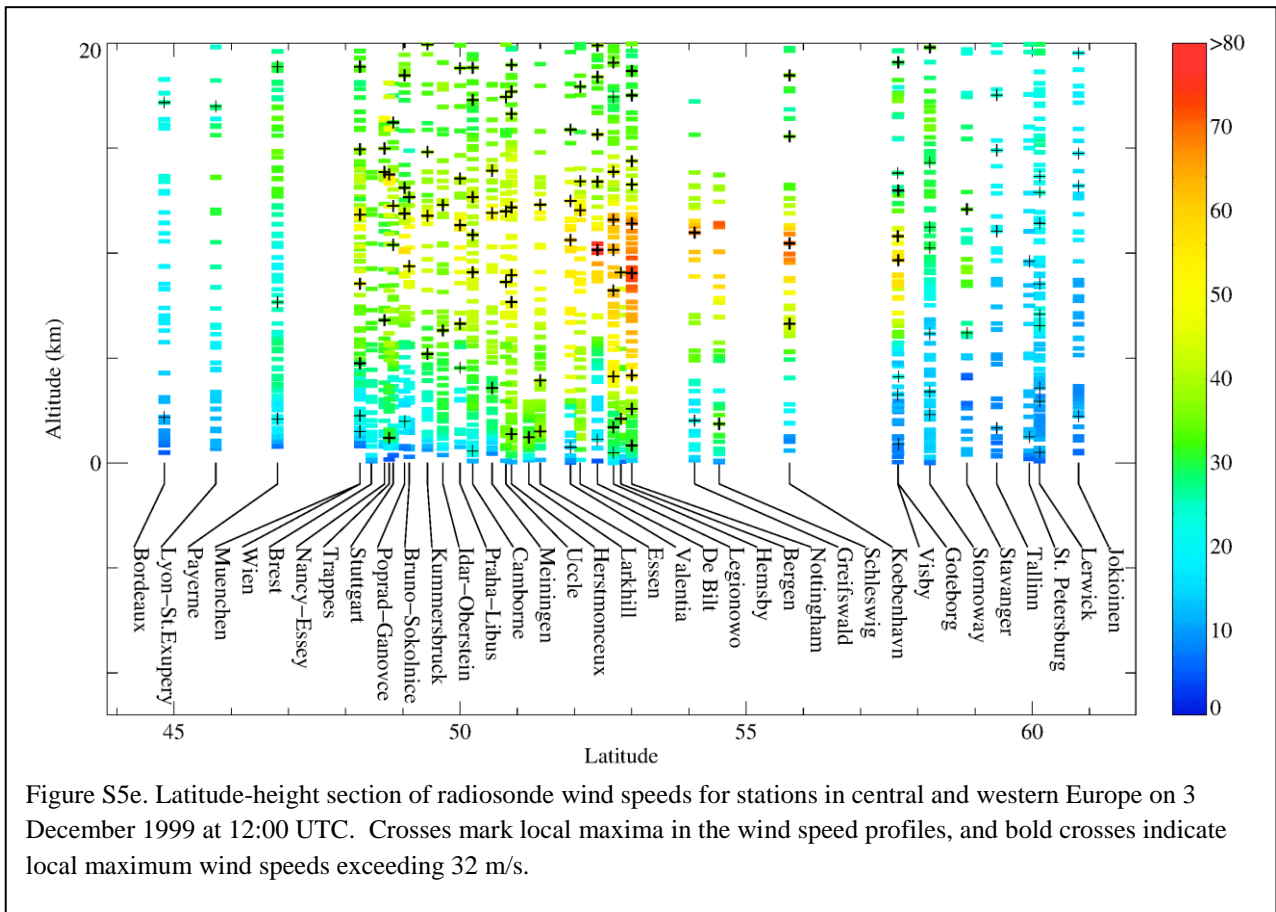

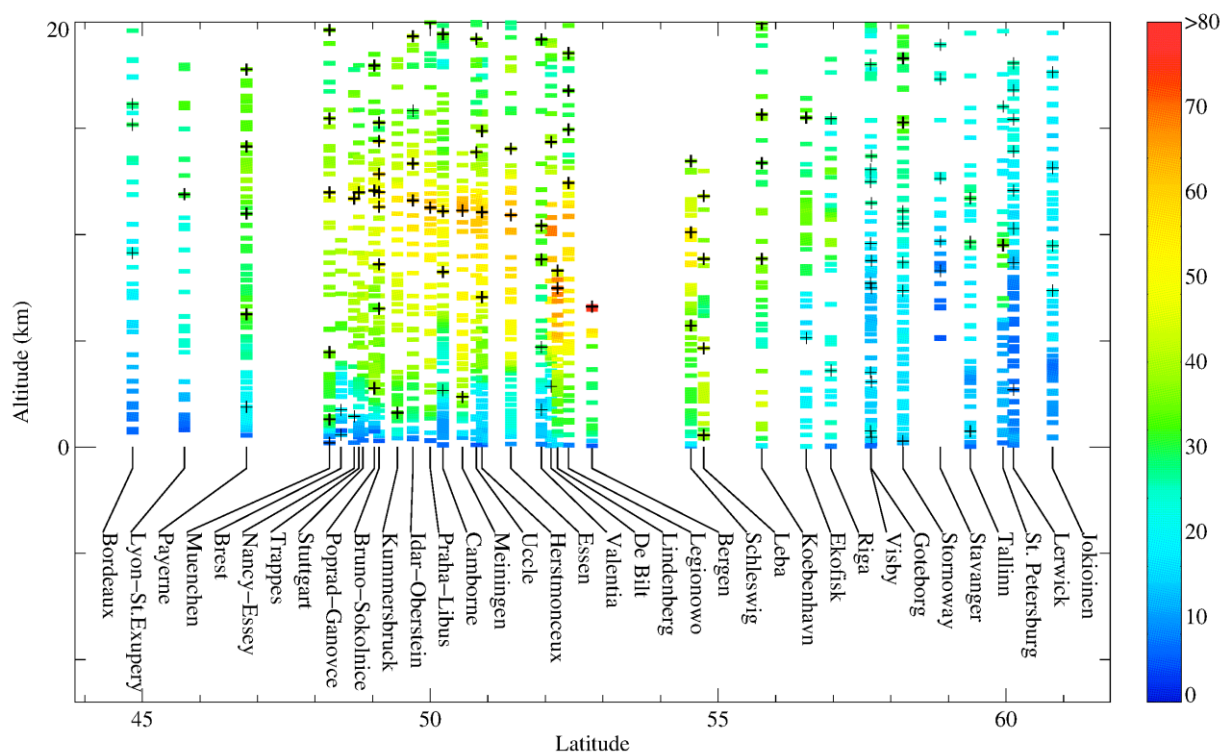

Figure S5f. Latitude-height section of radiosonde wind speeds for stations in central and western Europe on 4 December 1999 at 00:00 UTC. Crosses mark local maxima in the wind speed profiles, and bold crosses indicate local maximum wind speeds exceeding 32 m/s.

SECTION V. Thematic maps of storm impacts during Storm Anatol 3–4 December 1999

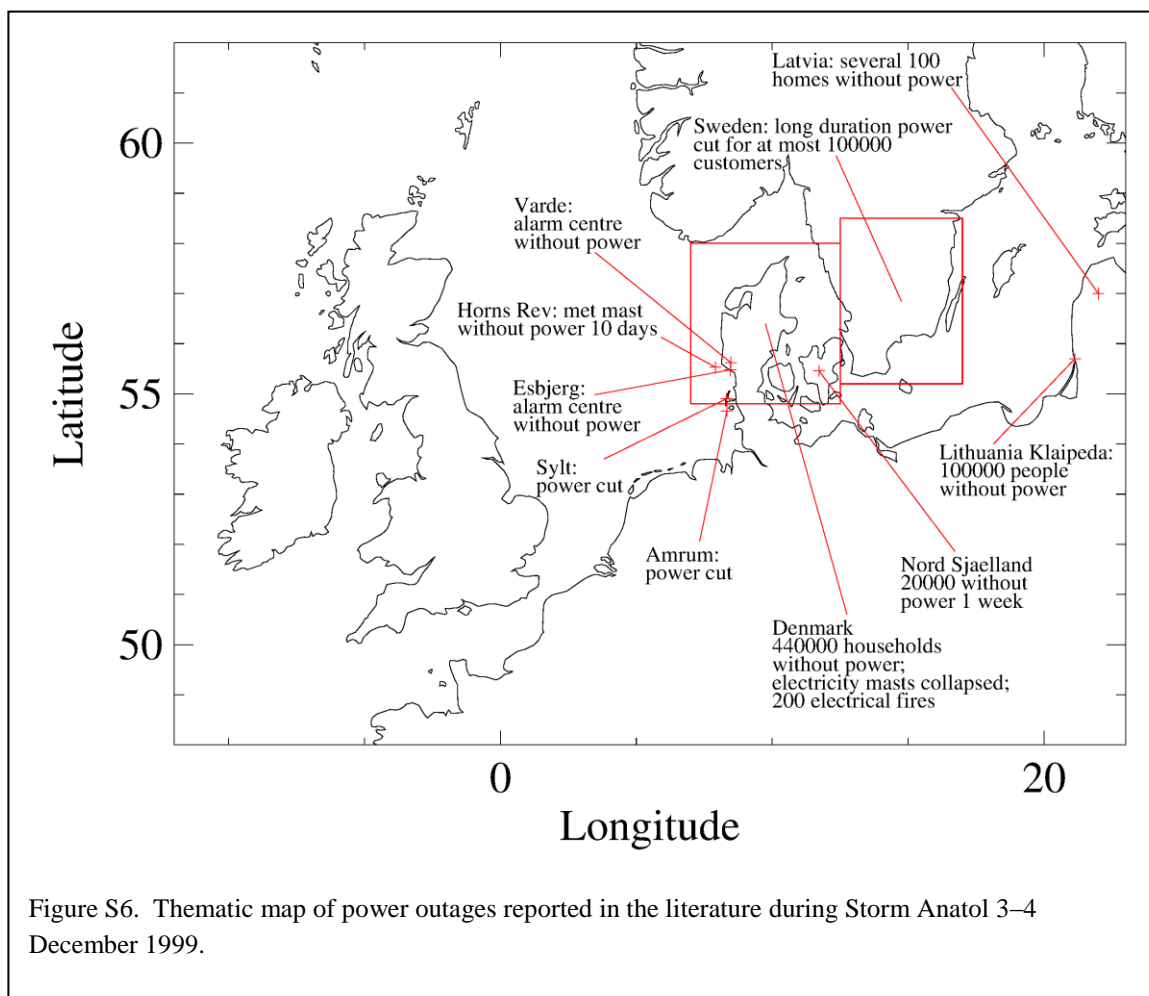



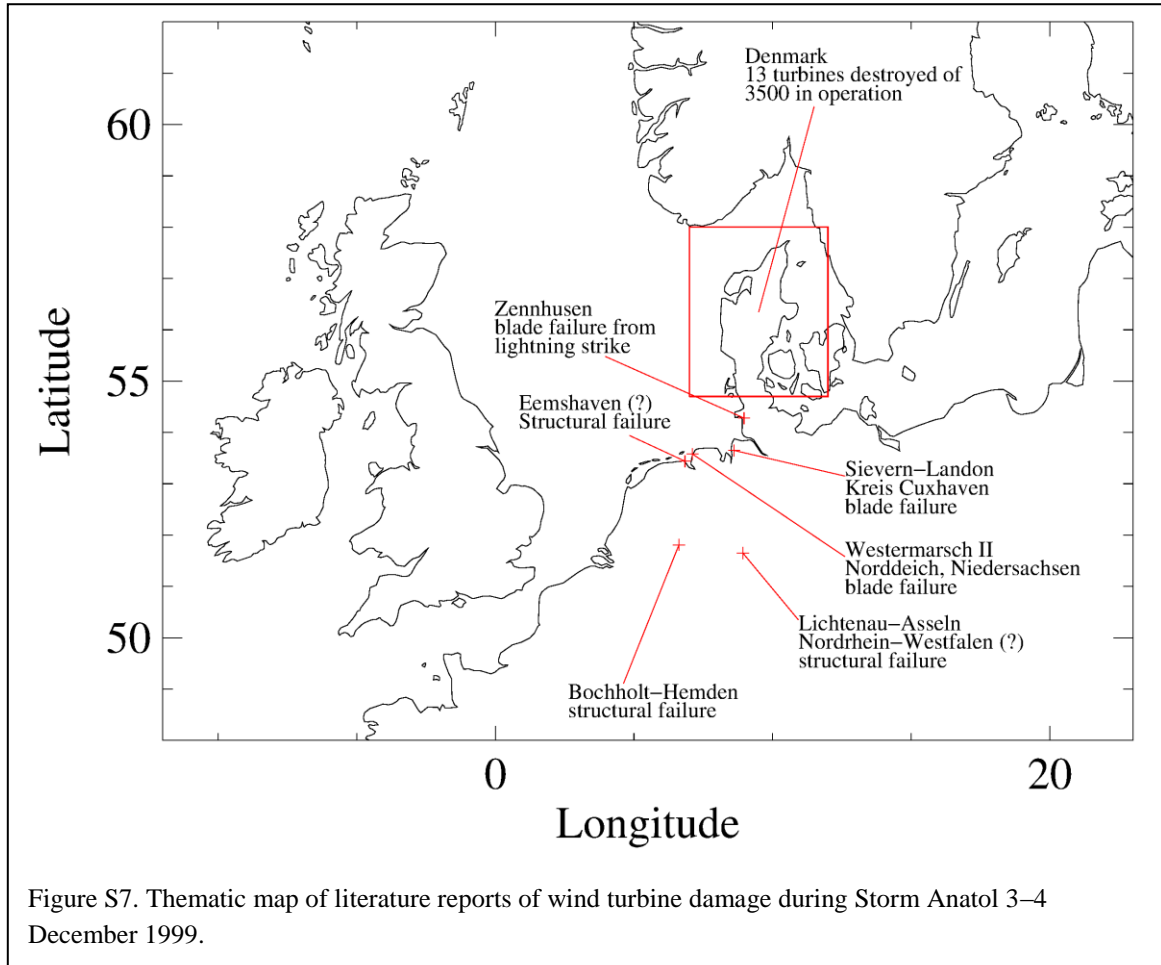

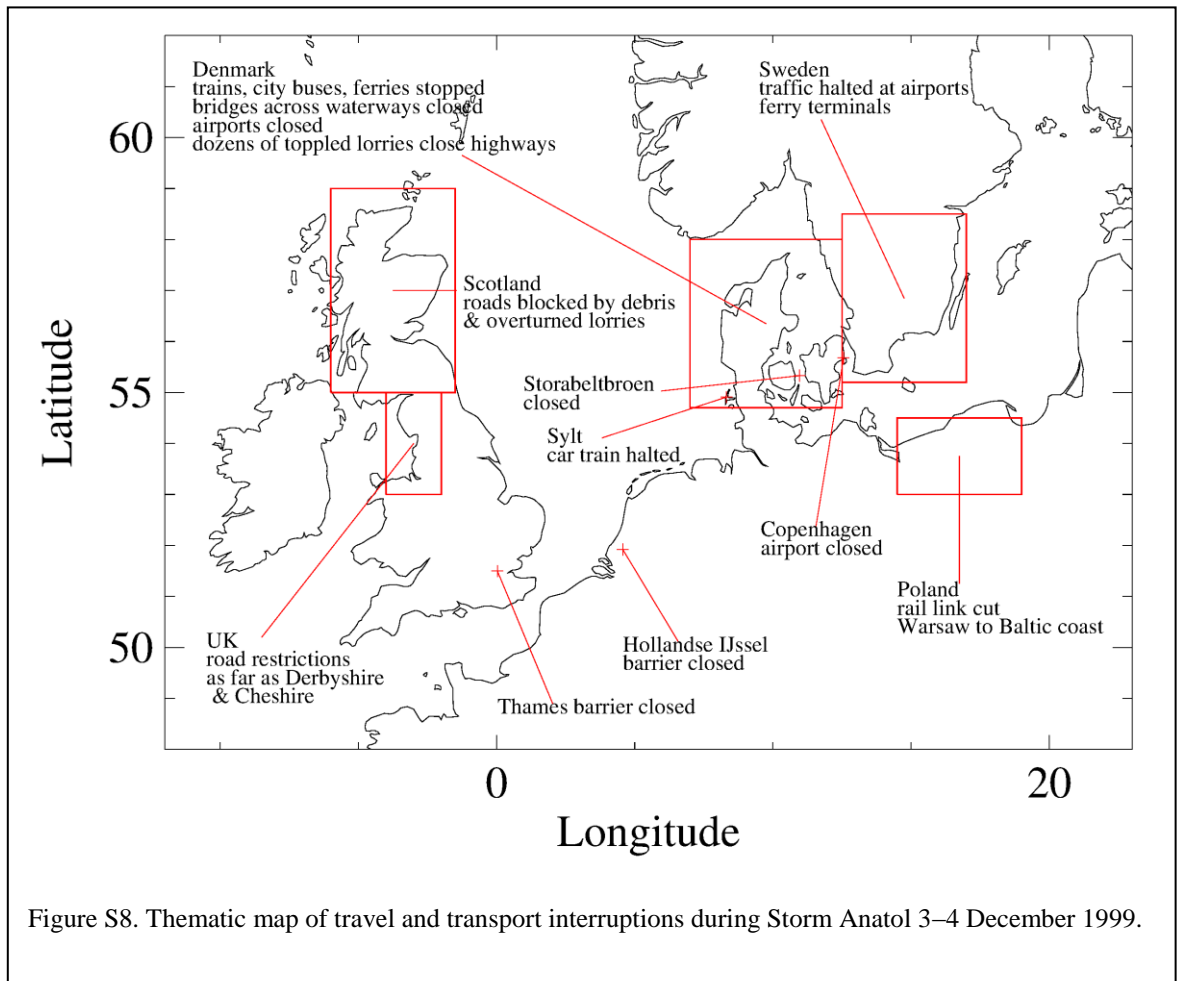

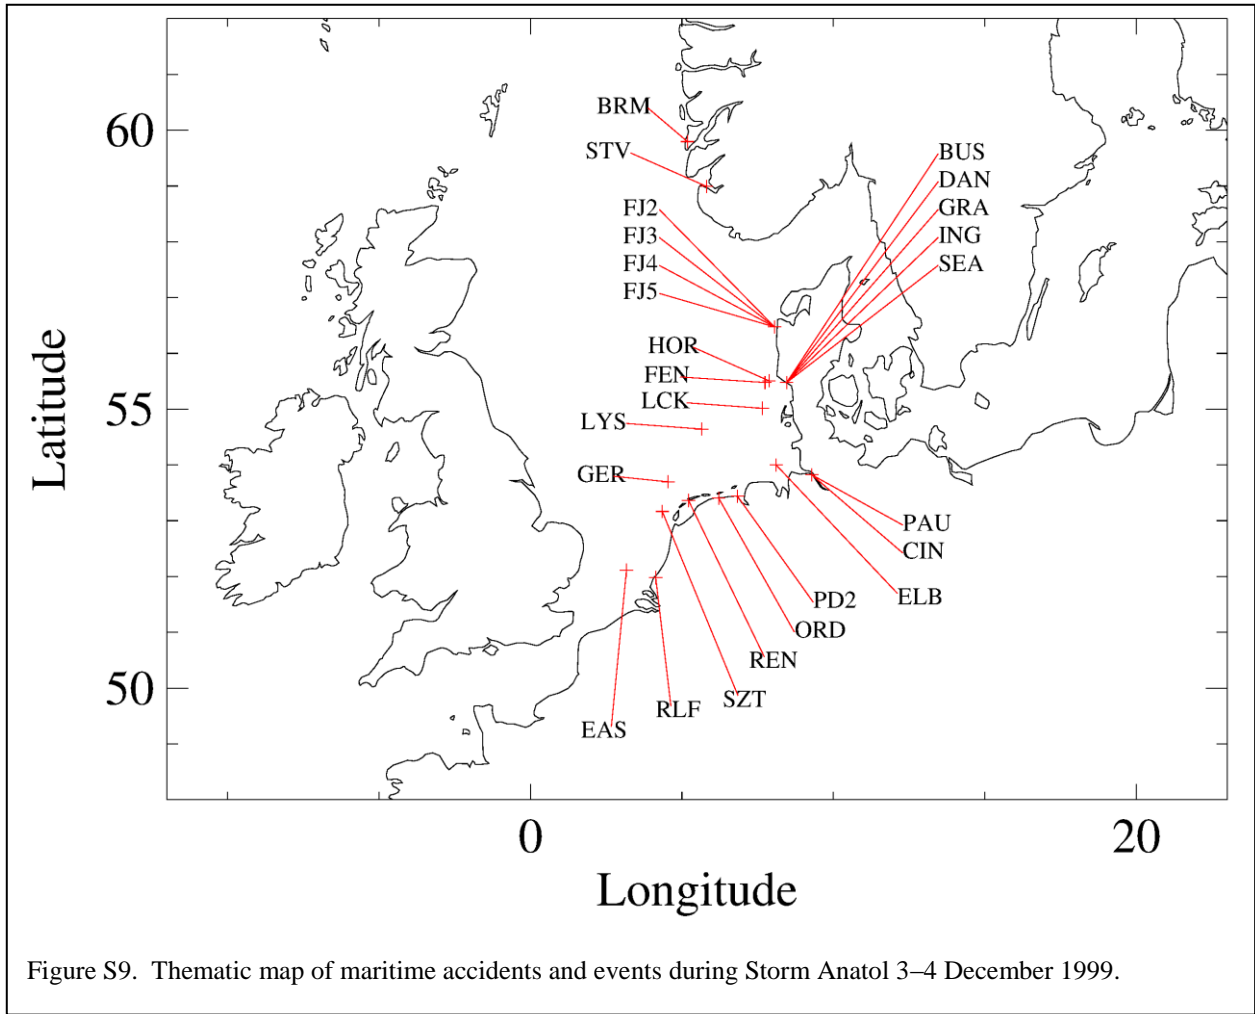

Figure S9. Thematic map of maritime accidents and events during Storm Anatol 3–4 December 1999.

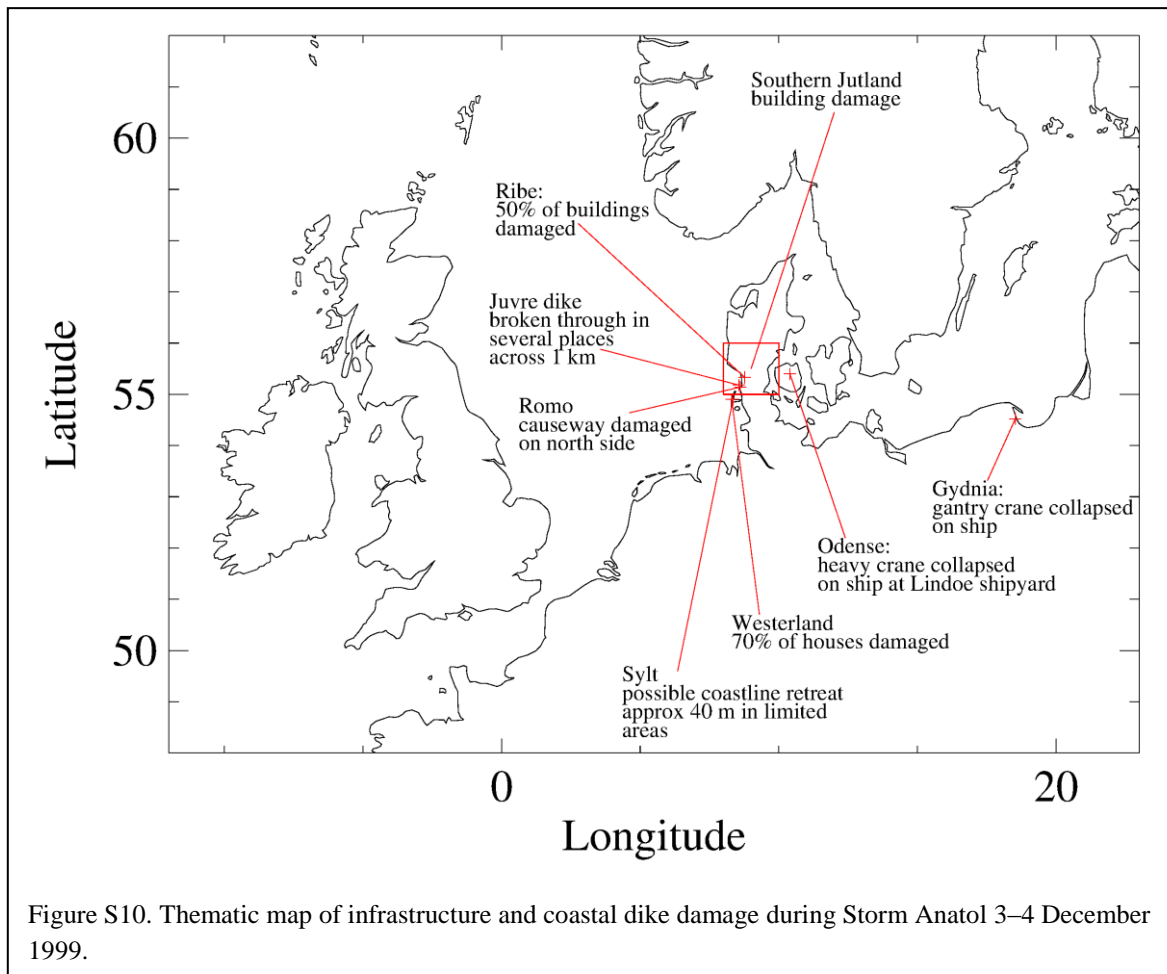

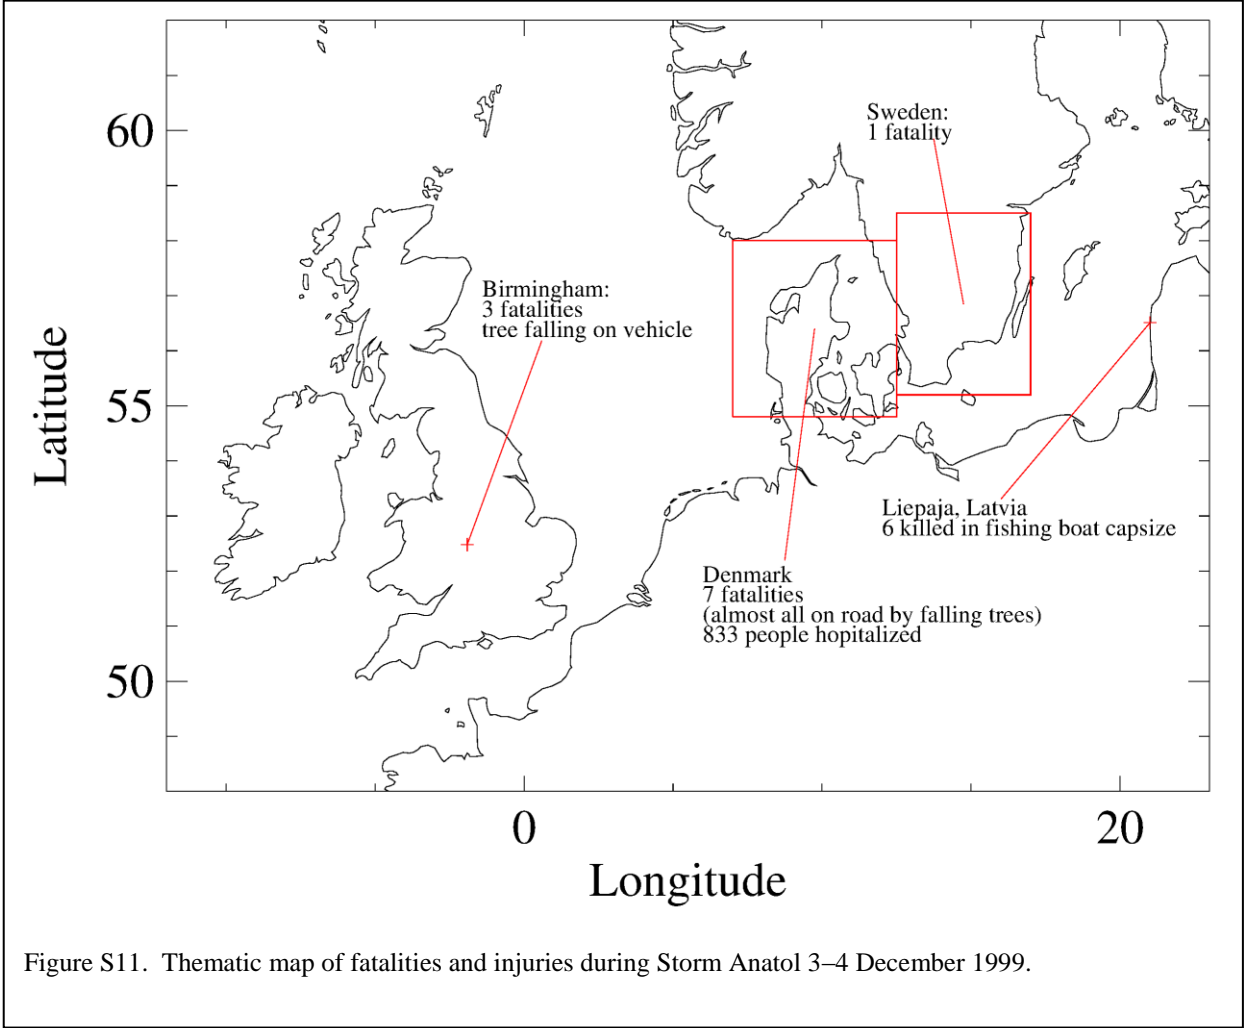

Figure S11. Thematic map of fatalities and injuries during Storm Anatol 3–4 December 1999.

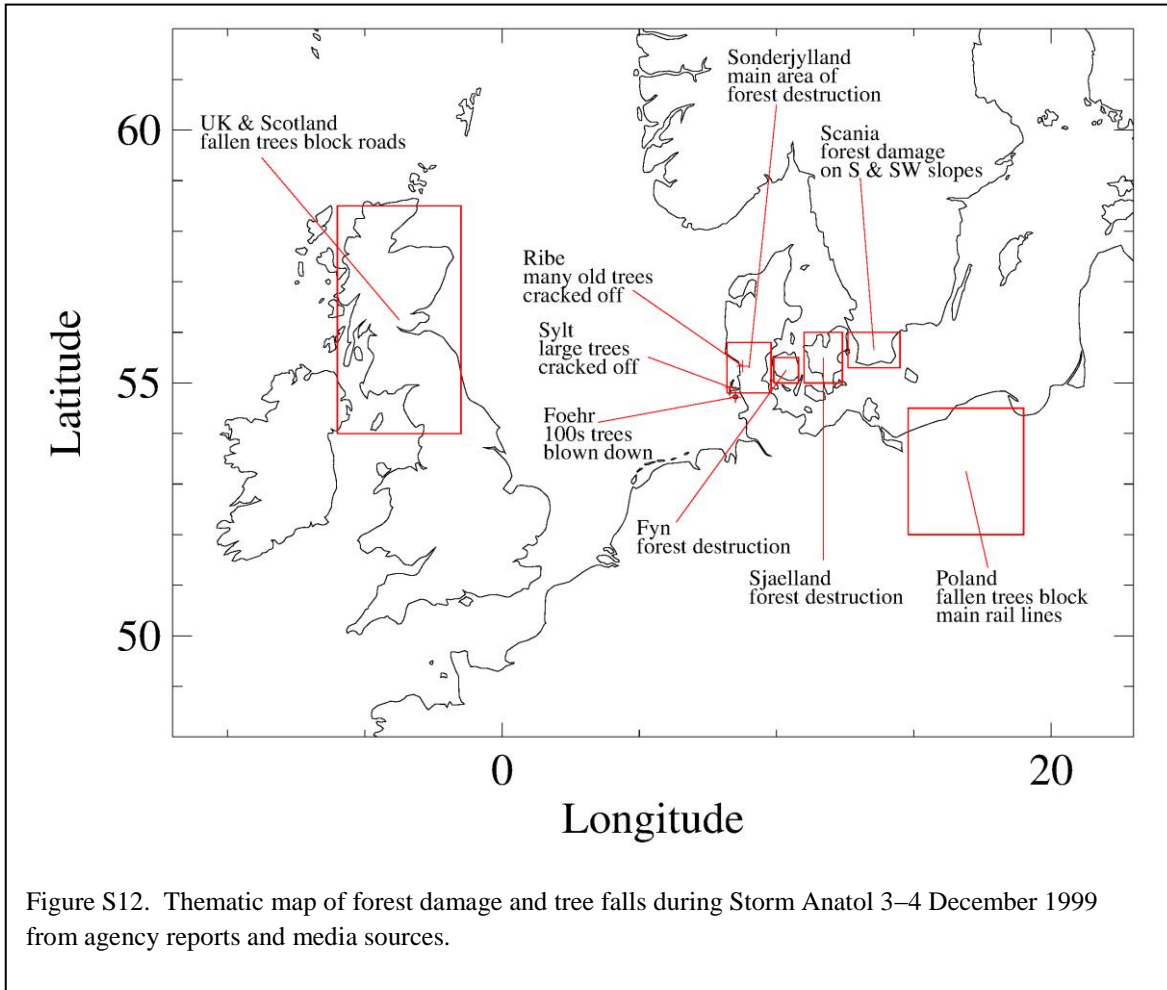

Figure S12. Thematic map of forest damage and tree falls during Storm Anatol 3–4 December 1999 from agency reports and media sources.

SECTION VI. Coastline modification on the west side of the German island of Sylt

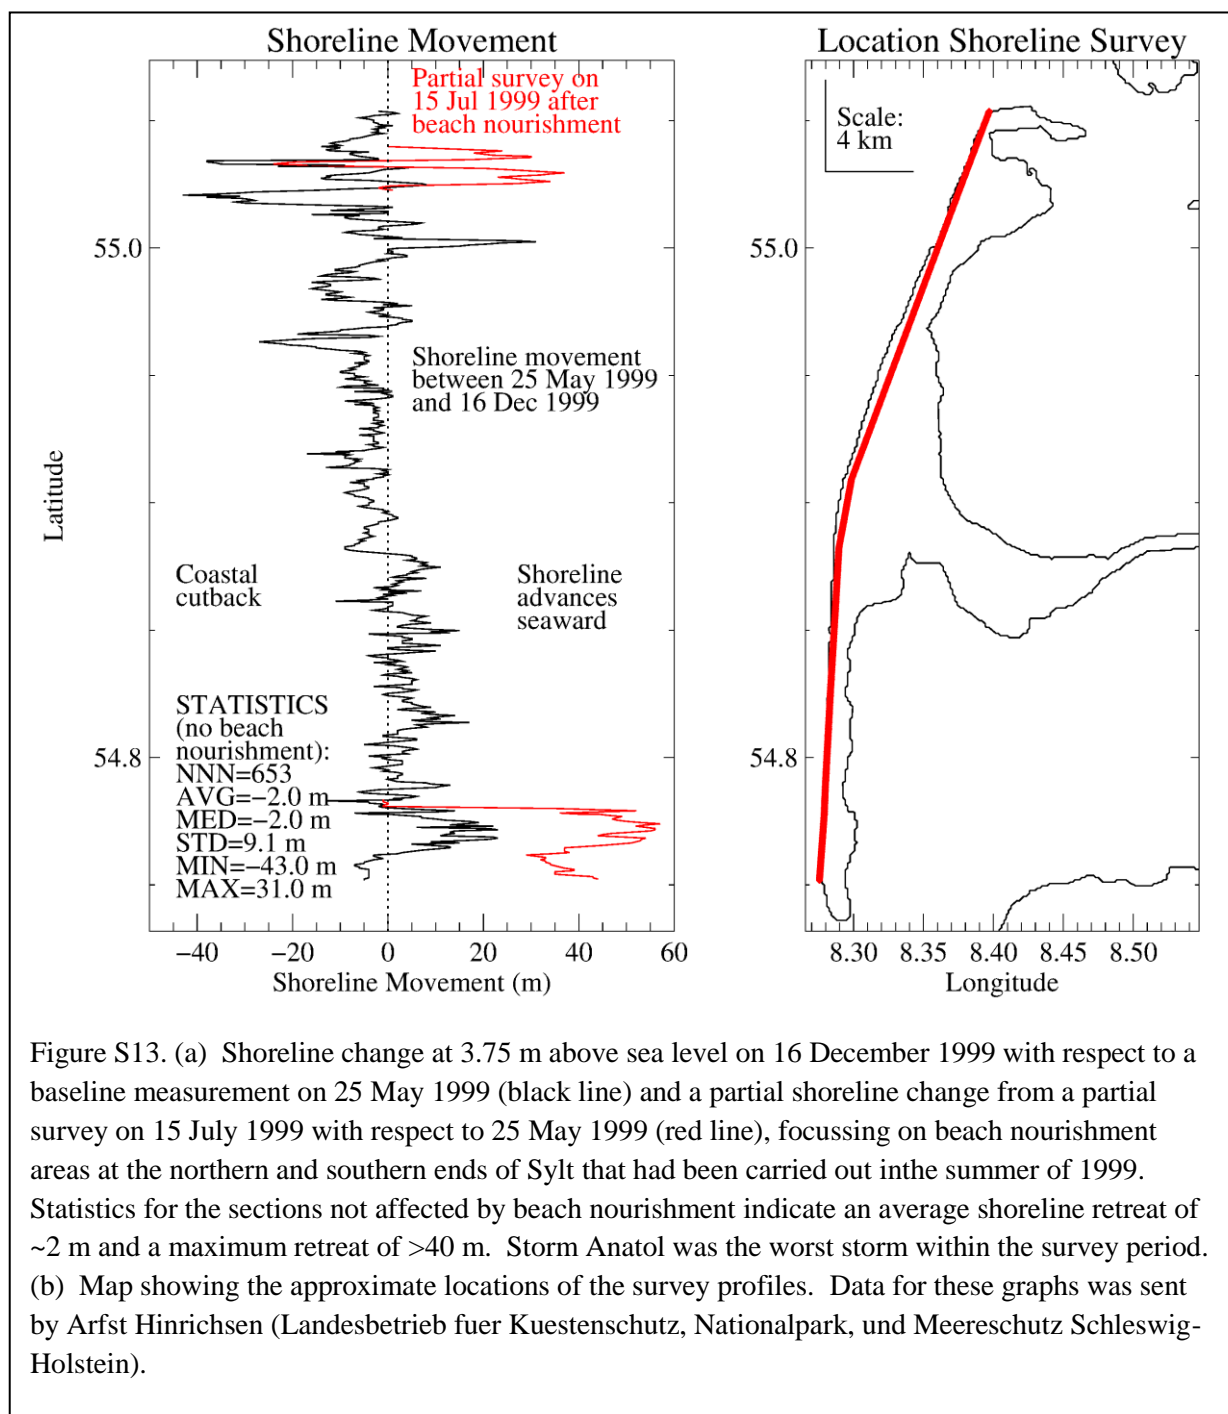

Figure S13. (a) Shoreline change at 3.75 m above sea level on 16 December 1999 with respect to a baseline measurement on 25 May 1999 (black line) and a partial shoreline change from a partial survey on 15 July 1999 with respect to 25 May 1999 (red line), focussing on beach nourishment areas at the northern and southern ends of Sylt that had been carried out in the summer of 1999. Statistics for the sections not affected by beach nourishment indicate an average shoreline retreat of ~2 m and a maximum retreat of >40 m. Storm Anatol was the worst storm within the survey period. (b) Map showing the approximate locations of the survey profiles. Data for these graphs was sent by Arfst Hinrichsen (Landesbetrieb fuer Kuestenschutz, Nationalpark, und Meereschutz Schleswig-Holstein).

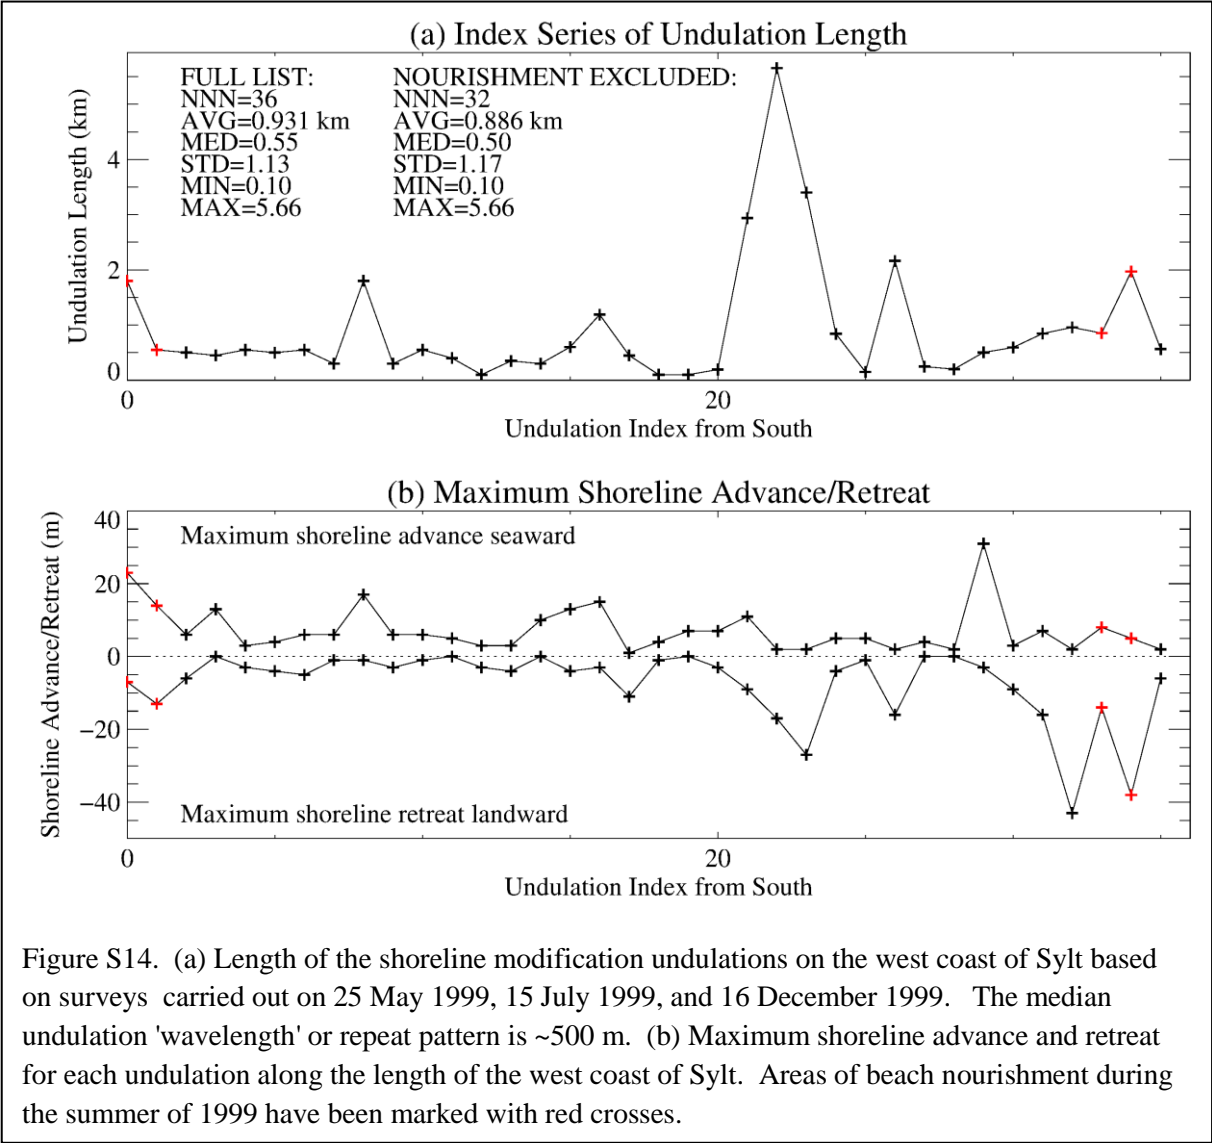

Figure S14. (a) Length of the shoreline modification undulations on the west coast of Sylt based on surveys carried out on 25 May 1999, 15 July 1999, and 16 December 1999. The median undulation 'wavelength' or repeat pattern is ~500 m. (b) Maximum shoreline advance and retreat for each undulation along the length of the west coast of Sylt. Areas of beach nourishment during the summer of 1999 have been marked with red crosses.



SECTION VII. Power spectra of water level data from UK east coast tide gauge stations

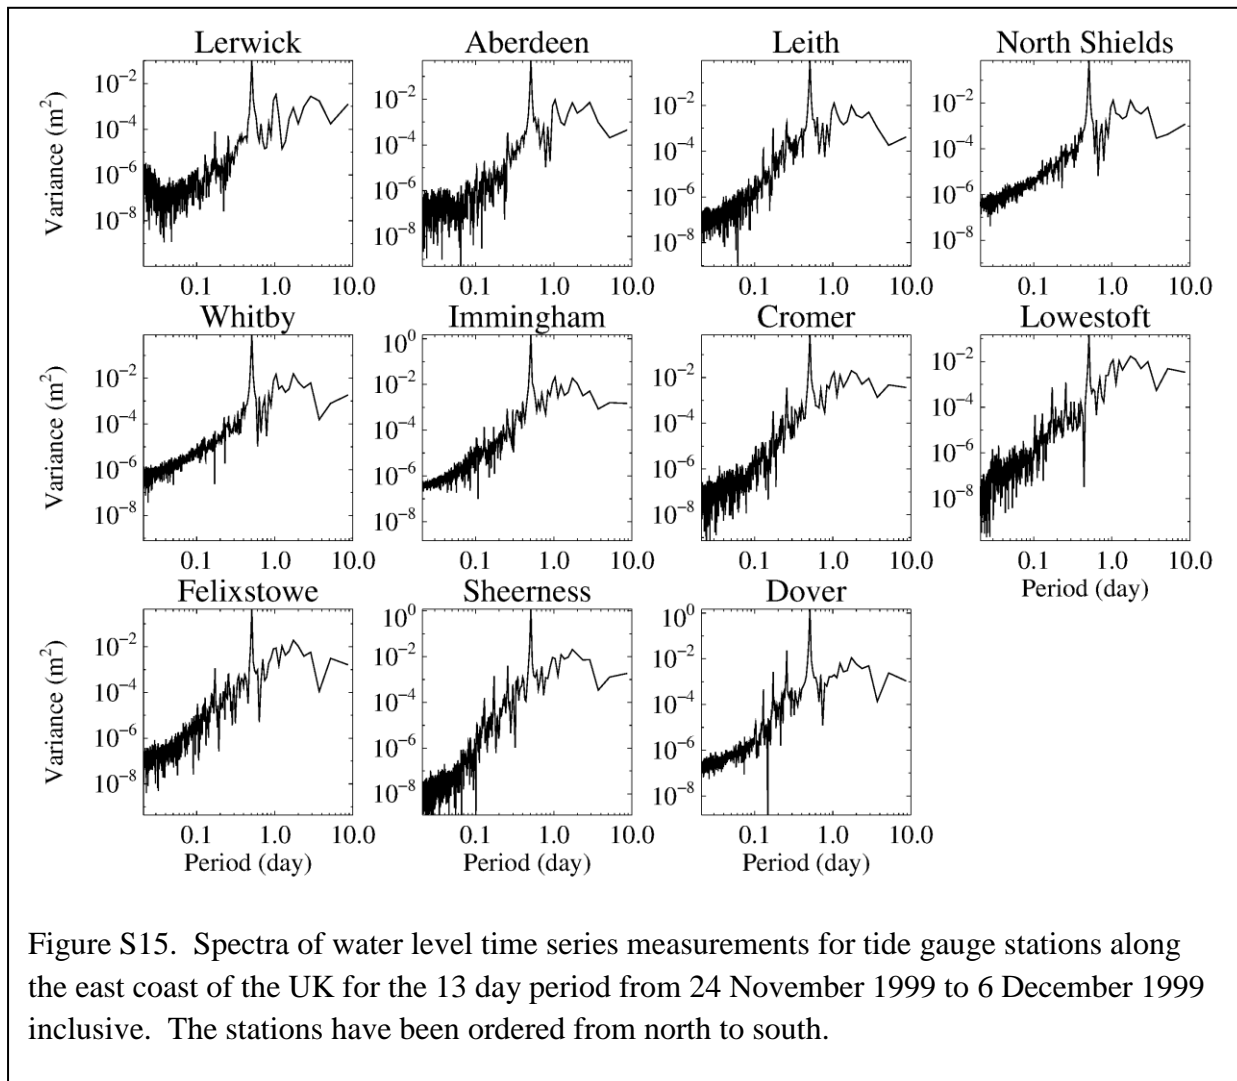

## SECTION VIII. Table of tide gauge stations used in the investigation

Table S2. Tide gauge information for 89 sites in the United Kingdom, France, the Netherlands, Germany, Denmark, and Norway.

| N   | Station Name          | Abb | Coun<br>try | Lati-<br>tude<br>(degree) | Longi-<br>tude<br>(degree) | $\Delta t$<br>orig<br>(min) | $\Delta t$<br>use<br>(min) | Source |
|-----|-----------------------|-----|-------------|---------------------------|----------------------------|-----------------------------|----------------------------|--------|
| [1] | [2]                   | [3] | [4]         | [5]                       | [6]                        | [7]                         | [8]                        | [9]    |
| 1   | North_Shields         | NS  | UK          | 55.01                     | -1.44                      | 15                          | 15                         | BODC   |
| 2   | Lerwick               | LW  | UK          | 60.15                     | -1.14                      | 15                          | 15                         | BODC   |
| 3   | Aberdeen              | AB  | UK          | 57.14                     | -2.07                      | 15                          | 15                         | BODC   |
| 4   | Leith                 | LE  | UK          | 55.99                     | -3.18                      | 15                          | 15                         | BODC   |
| 5   | Whitby                | WH  | UK          | 54.49                     | -0.61                      | 15                          | 15                         | BODC   |
| 6   | Immingham             | IM  | UK          | 53.63                     | -0.19                      | 15                          | 15                         | BODC   |
| 7   | Cromer                | CR  | UK          | 52.93                     | 1.30                       | 15                          | 15                         | BODC   |
| 8   | Lowestoft             | LT  | UK          | 52.47                     | 1.75                       | 15                          | 15                         | BODC   |
| 9   | Felixstowe            | FE  | UK          | 51.96                     | 1.35                       | 15                          | 15                         | BODC   |
| 10  | Sheerness             | SH  | UK          | 51.44                     | 0.74                       | 15                          | 15                         | BODC   |
| 11  | Dover                 | DV  | UK          | 51.12                     | 1.32                       | 15                          | 15                         | BODC   |
| 12  | Calais                | CA  | FR          | 50.97                     | 1.87                       | 60                          | 60                         | GESLA  |
| 13  | Dunkerque             | DK  | FR          | 51.05                     | 2.37                       | 60                          | 60                         | GESLA  |
| 14  | K13a platform         | KP  | NE          | 53.22                     | 3.22                       | 10                          | 10                         | RWS    |
| 15  | Lichteiland Goeree    | LG  | NE          | 51.92                     | 3.67                       | 10                          | 10                         | RWS    |
| 16  | Cadzand               | CZ  | NE          | 51.38                     | 3.38                       | 10                          | 10                         | RWS    |
| 17  | Terneuzen             | TE  | NE          | 51.34                     | 3.82                       | 10                          | 10                         | RWS    |
| 18  | Hansweert             | HW  | NE          | 51.45                     | 4.01                       | 10                          | 10                         | RWS    |
| 19  | Bath                  | BA  | NE          | 51.40                     | 4.21                       | 10                          | 10                         | RWS    |
| 20  | Bergse Diepsluis west | BD  | NE          | 51.51                     | 4.17                       | 10                          | 10                         | RWS    |
| 21  | Stavenisse            | SE  | NE          | 51.60                     | 4.01                       | 10                          | 10                         | RWS    |
| 22  | Krammersluizen west   | KM  | NE          | 51.66                     | 4.14                       | 10                          | 10                         | RWS    |
| 23  | Haringvliet 10        | HT  | NE          | 51.86                     | 3.86                       | 10                          | 10                         | RWS    |
| 24  | Spijknisse            | SJ  | NE          | 51.86                     | 4.33                       | 10                          | 10                         | RWS    |
| 25  | Goidschalxoord        | GX  | NE          | 51.83                     | 4.45                       | 10                          | 10                         | RWS    |
| 26  | Vlaardingen           | VD  | NE          | 51.90                     | 4.35                       | 10                          | 10                         | RWS    |
| 27  | Hoek van Holland      | HH  | NE          | 51.98                     | 4.12                       | 10                          | 10                         | RWS    |
| 28  | Dordrecht             | DD  | NE          | 51.82                     | 4.67                       | 10                          | 10                         | RWS    |
| 29  | Rotterdam             | RD  | NE          | 51.92                     | 4.50                       | 10                          | 10                         | RWS    |
| 30  | Krimpen a/d Lek       | KL  | NE          | 51.89                     | 4.63                       | 10                          | 10                         | RWS    |
| 31  | Scheveningen          | SC  | NE          | 52.10                     | 4.26                       | 10                          | 10                         | RWS    |
| 32  | Schoonhoven           | SO  | NE          | 51.94                     | 4.85                       | 10                          | 10                         | RWS    |
| 33  | IJmuiden buitenhaven  | IJ  | NE          | 52.46                     | 4.55                       | 10                          | 10                         | RWS    |
| 34  | Den Helder            | DH  | NE          | 52.96                     | 4.74                       | 10                          | 10                         | RWS    |
| 35  | Den Oever buiten      | DO  | NE          | 52.93                     | 5.05                       | 10                          | 10                         | RWS    |
| 36  | Oudeschild            | OS  | NE          | 53.04                     | 4.85                       | 10                          | 10                         | RWS    |
| 37  | Texel Noordzee        | TX  | NE          | 53.12                     | 4.73                       | 10                          | 10                         | RWS    |
| 38  | Kornwerderzand buiten | KW  | NE          | 53.07                     | 5.34                       | 10                          | 10                         | RWS    |
| 39  | Vlieland haven        | VH  | NE          | 53.30                     | 5.09                       | 10                          | 10                         | RWS    |
| 40  | Harlingen             | HL  | NE          | 53.18                     | 5.41                       | 10                          | 10                         | RWS    |

Table S2 (continued).

| N   | Station Name               | Abb | Coun-<br>try | Lati-<br>tude<br>(degree) | Longi-<br>tude<br>(degree) | $\Delta t$<br>orig<br>(min) | $\Delta t$<br>use<br>(min) | Source |
|-----|----------------------------|-----|--------------|---------------------------|----------------------------|-----------------------------|----------------------------|--------|
| [1] | [2]                        | [3] | [4]          | [5]                       | [6]                        | [7]                         | [8]                        | [9]    |
| 41  | West-Terschelling          | TL  | NE           | 53.36                     | 5.22                       | 10                          | 10                         | RWS    |
| 42  | Terschelling Noordzee      | TN  | NE           | 53.44                     | 5.33                       | 10                          | 10                         | RWS    |
| 43  | Nes                        | NE  | NE           | 53.43                     | 5.76                       | 10                          | 10                         | RWS    |
| 44  | Wierumergronden            | WG  | NE           | 53.52                     | 5.96                       | 10                          | 10                         | RWS    |
| 45  | Lauwersoog                 | LR  | NE           | 53.41                     | 6.20                       | 10                          | 10                         | RWS    |
| 46  | Schiermonnikoog            | SM  | NE           | 53.47                     | 6.20                       | 10                          | 10                         | RWS    |
| 47  | Huibertgat                 | HG  | NE           | 53.57                     | 6.40                       | 10                          | 10                         | RWS    |
| 48  | Eemshaven                  | EE  | NE           | 53.45                     | 6.83                       | 10                          | 10                         | RWS    |
| 49  | Delfzijl                   | DF  | NE           | 53.33                     | 6.93                       | 10                          | 10                         | RWS    |
| 50  | Knock                      | KN  | DE           | 53.33                     | 7.04                       | 1                           | 10                         | BAFG   |
| 51  | Emden-Neue-Seeschleuse     | EM  | DE           | 53.34                     | 7.20                       | 1                           | 10                         | BAFG   |
| 52  | Borkum-Fischerbalje        | BF  | DE           | 53.56                     | 6.75                       | 1                           | 10                         | BAFG   |
| 53  | Bremen-Grosse-Weserbruecke | BW  | DE           | 53.07                     | 8.80                       | 1                           | 10                         | BAFG   |
| 54  | Norderney-Riffgat          | ND  | DE           | 53.70                     | 7.16                       | 1                           | 10                         | BAFG   |
| 55  | Zollenspieker              | ZO  | DE           | 53.40                     | 10.19                      | 1                           | 10                         | BAFG   |
| 56  | Hamburg-St-Pauli           | HB  | DE           | 53.55                     | 9.97                       | 1                           | 10                         | BAFG   |
| 57  | Pinnau-Sperrwerk-AP        | PS  | DE           | 53.67                     | 9.56                       | 1                           | 10                         | BAFG   |
| 58  | Kollmar                    | KO  | DE           | 53.73                     | 9.46                       | 1                           | 10                         | BAFG   |
| 59  | Glueckstadt                | GL  | DE           | 53.78                     | 9.41                       | 1                           | 10                         | BAFG   |
| 60  | LT-Alte-Weser              | AW  | DE           | 53.86                     | 8.13                       | 1                           | 10                         | BAFG   |
| 61  | Stoer-Sperrwerk-AP         | SS  | DE           | 53.83                     | 9.40                       | 1                           | 10                         | BAFG   |
| 62  | Cuxhaven-Steubenhoeft      | CU  | DE           | 53.87                     | 8.72                       | 1                           | 10                         | BAFG   |
| 63  | Brunsbuettel-Mole4         | BR  | DE           | 53.89                     | 9.14                       | 1                           | 10                         | BAFG   |
| 64  | Mittelgrund                | MG  | DE           | 53.94                     | 8.63                       | 1                           | 10                         | BAFG   |
| 65  | Zehnerloch                 | ZE  | DE           | 53.95                     | 8.66                       | 1                           | 10                         | BAFG   |
| 66  | Scharhoern                 | SN  | DE           | 53.97                     | 8.46                       | 1                           | 10                         | BAFG   |
| 67  | Bake-Z                     | BZ  | DE           | 54.01                     | 8.32                       | 1                           | 10                         | BAFG   |
| 68  | Buesum                     | BU  | DE           | 54.12                     | 8.86                       | 1                           | 10                         | BAFG   |
| 69  | Helgoland-Binnenhafen      | HE  | DE           | 54.18                     | 7.90                       | 1                           | 10                         | BAFG   |
| 70  | Helgoland-Suedhafen        | HS  | DE           | 54.18                     | 7.90                       | 1                           | 10                         | BAFG   |
| 71  | Eidersperrwerk-AP          | EI  | DE           | 54.26                     | 8.84                       | 1                           | 10                         | BAFG   |
| 72  | Husum                      | HU  | DE           | 54.47                     | 9.02                       | 1                           | 10                         | BAFG   |
| 73  | Pellworm                   | PW  | DE           | 54.50                     | 8.70                       | 1                           | 10                         | BAFG   |
| 74  | Wittduen                   | WI  | DE           | 54.63                     | 8.39                       | 1                           | 10                         | BAFG   |
| 75  | Dagebuell                  | DA  | DE           | 54.73                     | 8.69                       | 1                           | 10                         | BAFG   |
| 76  | Hoernum                    | HR  | DE           | 54.76                     | 8.31                       | 1                           | 10                         | BAFG   |
| 77  | List                       | LS  | DE           | 55.02                     | 8.45                       | 1                           | 10                         | BAFG   |
| 78  | Hojer                      | HO  | DK           | 54.96                     | 8.66                       | 15                          | 15                         | KDI    |
| 79  | Havneby                    | HY  | DK           | 55.09                     | 8.57                       | 15                          | 15                         | KDI    |
| 80  | Ballum                     | BM  | DK           | 55.13                     | 8.69                       | 15                          | 15                         | KDI    |

Table S2 (continued).

| N   | Station Name              | Abb | Country | Latitude (degree) | Longitude (degree) | $\Delta t$ orig (min) | $\Delta t$ use (min) | Source |
|-----|---------------------------|-----|---------|-------------------|--------------------|-----------------------|----------------------|--------|
| [1] | [2]                       | [3] | [4]     | [5]               | [6]                | [7]                   | [8]                  | [9]    |
| 81  | Esbjerg                   | EJ  | DK      | 55.47             | 8.42               | 15                    | 15                   | KDI    |
| 82  | Hvide Sande (Havet)       | HV  | DK      | 56.00             | 8.11               | 15                    | 15                   | KDI    |
| 83  | Thorsminde (Havet)        | TO  | DK      | 56.37             | 8.11               | 15                    | 15                   | KDI    |
| 84  | Ferring                   | FR  | DK      | 56.52             | 8.12               | 15                    | 15                   | KDI    |
| 85  | Thyboron (Havet hofde 58) | TY  | DK      | 56.71             | 8.21               | 15                    | 15                   | KDI    |
| 86  | Tregde                    | TG  | NO      | 58.01             | 7.56               | 10                    | 10                   | Kartv  |
| 87  | Stavanger                 | SV  | NO      | 58.97             | 5.73               | 10                    | 10                   | Kartv  |
| 88  | Bergen                    | BG  | NO      | 60.39             | 5.32               | 10                    | 10                   | Kartv  |
| 89  | Maloy                     | MY  | NO      | 61.94             | 5.11               | 10                    | 10                   | Kartv  |

Notes:

[1] Station running index

[2] Station name

[3] Station abbreviation used in figures of the main manuscript

[4] Country

[5] Latitude

[6] Longitude

[7] Data reporting interval in minutes

[8] Data time interval used in analysis; data for the Germany stations was averaged onto a 10 minute grid.

[9] Source:

BODC: (British Oceanographic Data Centre)

[https://bodc.ac.uk/data/hosted\\_data\\_systems/sea\\_level/uk\\_tide\\_gauge\\_network/](https://bodc.ac.uk/data/hosted_data_systems/sea_level/uk_tide_gauge_network/)

GESLA: (Global Extreme Sea Level Analysis) <https://www.gesla.org>

RWS: (Rijkswatersaat Waterinfo) <https://waterinfo.rws.nl/#!/nav/expert/alle-groepen/>

BAFG: (Bundesanstalt fuer Gewaesserkunde) email communication with Wilfried Wiechmann at Datenstelle-M1@bafg.de

KDI: (Kystdirektoratet) <https://kystatlas.kyst.dk/public2/data/vandstand/vandstand.html>

Kartv: (Kartverket) [api.sehavniva.no/tideapi\\_en.html](https://api.sehavniva.no/tideapi_en.html)

## SECTION IX. Table of maritime accidents and incidents 3–4 December 1999

Table S3. Information for the maritime accidents and offshore events for 3–4 December 1999.

| N   | Ship/Platform Name or Incident | Abb | Latitude (deg) | Longitude (deg) | Date (GMT) dd/mm/yyyy | Time GMT hh:mm | Source              |
|-----|--------------------------------|-----|----------------|-----------------|-----------------------|----------------|---------------------|
| [1] | [2]                            | [3] | [4]            | [5]             | [6]                   | [7]            | [8]                 |
| 1   | Bremnes                        | BRM | 59.79          | 5.18            | 03/12/1999            | 01:30          | LCW_SR19991217      |
| 2   | Bussard                        | BUS | 55.48          | 8.46            | 03/12/1999            | 18:00          | LCW_SR19991217      |
| 3   | Cincobulk                      | CIN | 53.82          | 9.29            | 03/12/1999            | 18:00          | LCW_SR19991217      |
| 4   | Dana Hafnia                    | DAN | 55.48          | 8.46            | 03/12/1999            | 18:00          | LCW_SR19991217      |
| 5   | Eastfern                       | EAS | 52.11          | 3.17            | 03/12/1999            | 16:20          | LCW_SR19991217,KNRM |
| 6   | Fensfjord                      | FEN | 55.48          | 7.74            | 04/12/1999            | 06:45          | LCW_SR19991217      |
| 7   | Gerarda                        | GER | 53.70          | 4.54            | 04/12/1999            | 12:35          | LCW_SR19991217,KNRM |
| 8   | G.Graadyb                      | GRA | 55.48          | 8.46            | 03/12/1999            | 18:00          | LCW_SR19991217      |
| 9   | Ingrid P                       | ING | 55.48          | 8.46            | 03/12/1999            | 18:00          | LCW_SR19991217      |
| 10  | Lucky Fortune                  | LCK | 55.01          | 7.66            | 03/12/1999            | 17:10          | LCW_SR19991217      |
| 11  | Lys Ranger                     | LYS | 54.64          | 5.65            | 03/12/1999            | 03:00          | LCW_SR19991217      |
| 12  | Oerd                           | ORD | 53.40          | 6.21            | 03/12/1999            | 13:05          | LCW_SR19991217,KNRM |
| 13  | Paula Ahrens                   | PAU | 53.82          | 9.29            | 03/12/1999            | 12:00          | LCW_SR19991217      |
| 14  | Rolf Buck                      | RLF | 51.98          | 4.13            | 03/12/1999            | 13:05          | LCW_SR19991217      |
| 15  | Sea Explorer                   | SEA | 55.48          | 8.46            | 03/12/1999            | 18:00          | LCW_SR19991217      |
| 16  | Stavanger                      | STV | 58.99          | 5.81            | 03/12/1999            | 11:30          | LCW_SR19991217      |
| 17  | Sztorm-2                       | SZT | 53.17          | 4.35            | 03/12/1999            | 13:05          | LCW_SR19991217,KNRM |
| 18  | Renasa                         | REN | 53.36          | 5.22            | 03/12/1999            | 17:15          | KNRM                |
| 19  | PD_236                         | PD2 | 53.44          | 6.84            | 03/12/1999            | 09:30          | KNRM                |
| 20  | Feuerschiff Elbe               | ELB | 54.00          | 8.11            | 03/12/1999            | 12:00          | JM2008              |
| 21  | Horns Rev mast                 | HOR | 55.51          | 7.88            | 03/12/1999            | 22:50          | S2002               |
| 22  | Fjaltring wave 2               | FJ2 | 56.47          | 8.06            | 03/12/1999            | 20:45          | KDI                 |
| 23  | Fjaltring wave 3               | FJ3 | 56.47          | 8.06            | 03/12/1999            | 18:00          | KDI                 |
| 24  | Fjaltring wave 4               | FJ4 | 56.47          | 8.06            | 04/12/1999            | 00:00          | KDI                 |
| 25  | Fjaltring wave 5               | FJ5 | 56.47          | 8.06            | 03/12/1999            | 13:45          | KDI                 |

## Notes:

[1] Running index of event

[2] Ship/platform name or wave measuring instrument with incident number

[3] Abbreviation used in figures of main manuscript

[4] Latitude

[5] Longitude

[6] Date of incident

[7] Time of incident

[8] Source

LCW\_SR19991217: Lloyd's Casualty Week: vol. 318, No. 12, 17 December 1999.

KNRM: Koninklijke Nederlandse Redding Maatschappij; list of Dutch coastal rescues emailed by Gerda van Vliet.

JM2008: Jensen J, SH Mueller-Navarra, Storm surges on the German coast, Die Kueste, 74 ICCE (2008), 92-124.

S2002: Sommer A, Wind Resources at Horns Rev, Eltra PSO-2000 Proj nr. EG-05 3248, Tech-wise, 2002.

KDI: Kystdirektoratet; unusual maximum wave heights registered by the Fjaltring waverider buoy and from online time series data.

SECTION X. Tide gauge levelling differences and corrections to literature surge values

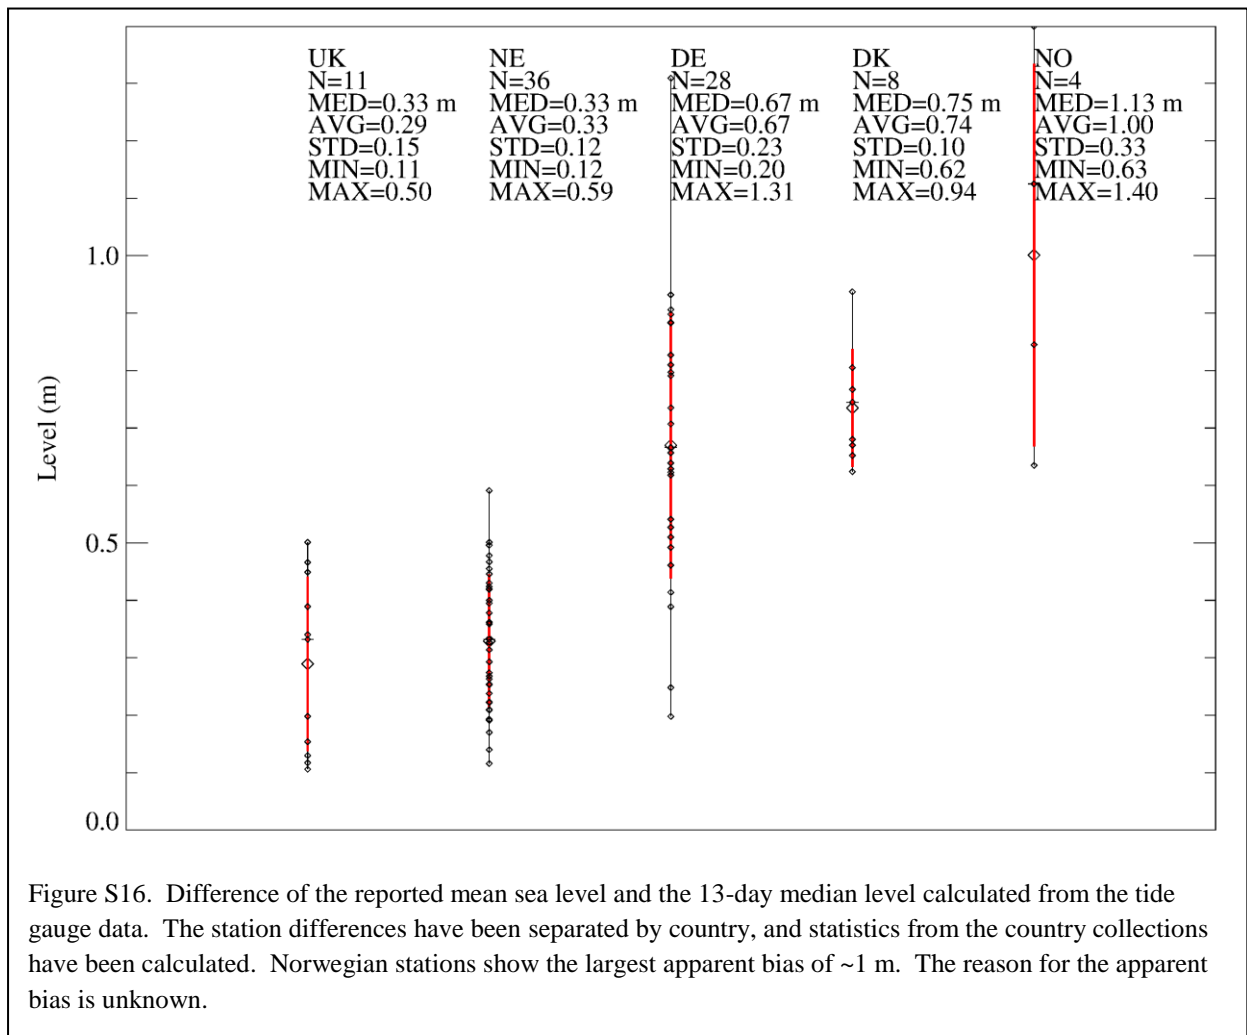

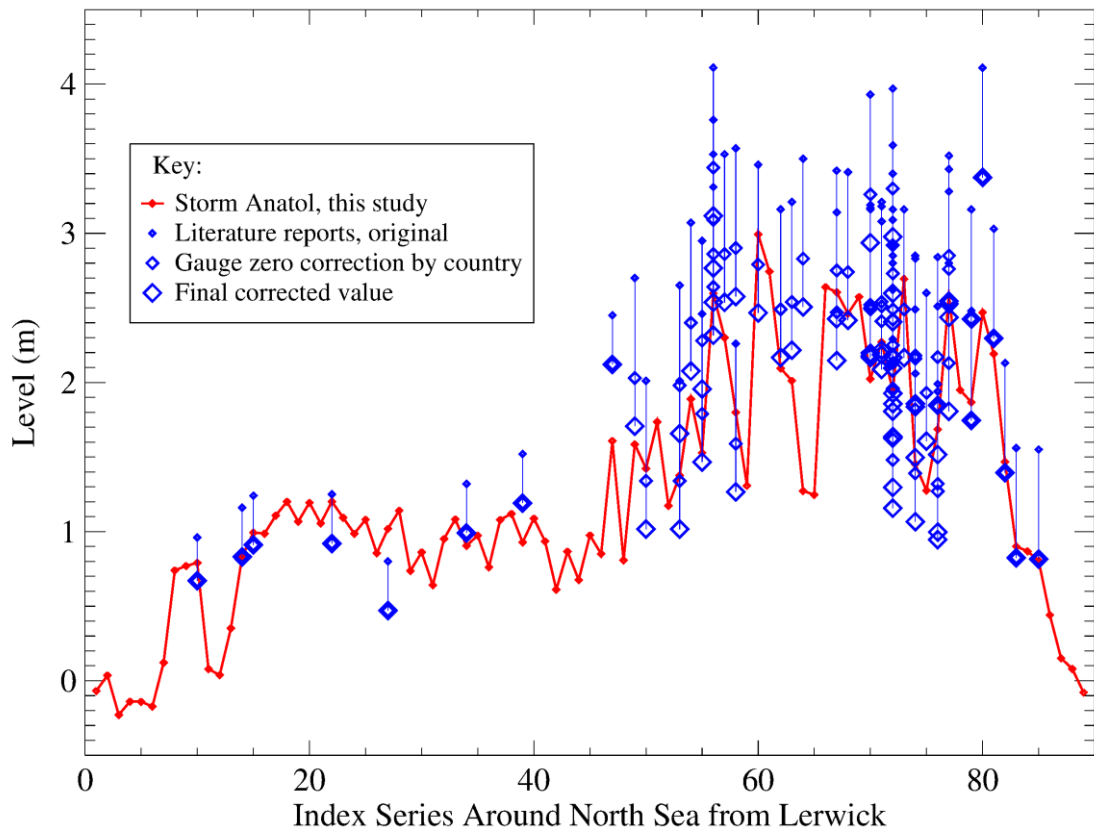

Figure S17. Storm Anatol skew surge for tide gauge stations with index arrangement around the North Sea coast starting from Lerwick in Scotland. The blue symbols give the original literature reports and with corrections applied to compare with the present analysis. The correction relates to the difference between official mean sea level for a station and 13-day mean calculated from the tide gauge data. Corrections to the literature values are made on a country basis using the average of the national collection of stations. An additional correction has been applied to the German literature values to convert from the country convention of measured maximum water level above mean high water to skew surge.

SECTION XI. Maximum amplitude of short period oscillations

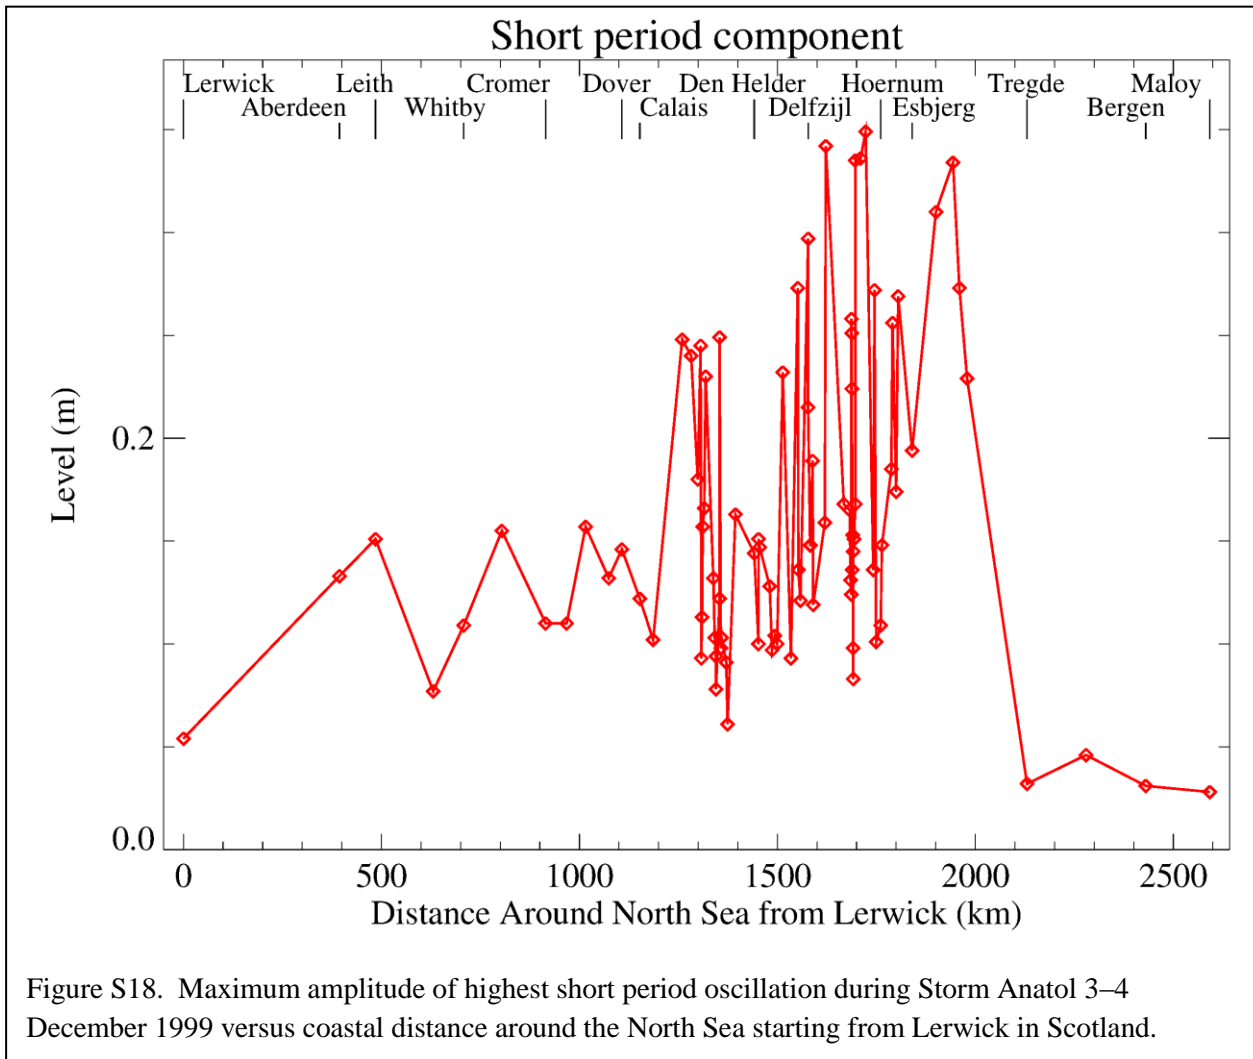



Table S4. List of maximum range (in descending order) of down-crossing oscillations derived from the short period time series reconstructions for each North Sea tide gauge station.

| N  | Station Name               | Range (cm) | Midpoint of Oscillation (h after start 3 Dec 1999) | Duration of Oscillation (h) |
|----|----------------------------|------------|----------------------------------------------------|-----------------------------|
| 1  | Bremen–Grosse–Weserbruecke | 66.1       | 43.42                                              | 3.33                        |
| 2  | Hvide Sande (Havet)        | 62.8       | 11.88                                              | 2.75                        |
| 3  | Eidersperrwerk–AP          | 62.1       | 16.33                                              | 3.17                        |
| 4  | Thorsminde (Havet)         | 61.7       | 12.12                                              | 2.25                        |
| 5  | Stoer–Sperrwerk–AP         | 59.7       | 18.25                                              | 3.67                        |
| 6  | Ferring                    | 59.7       | 12.50                                              | 3.00                        |
| 7  | Buesum                     | 59.5       | 16.92                                              | 3.33                        |
| 8  | Bake–Z                     | 52.8       | 19.67                                              | 1.50                        |
| 9  | Pinnau–Sperrwerk–AP        | 50.8       | 18.83                                              | 3.83                        |
| 10 | Ballum                     | 50.5       | 16.25                                              | 2.50                        |
| 11 | Bath                       | 48.5       | 9.83                                               | 3.67                        |
| 12 | Husum                      | 48.2       | 22.00                                              | 3.83                        |
| 13 | Delfzijl                   | 44.5       | 19.58                                              | 0.83                        |
| 14 | Thyboron (Havet hofde 58)  | 44.4       | 12.62                                              | 2.75                        |
| 15 | Krammersluizen west        | 42.4       | 43.67                                              | 2.00                        |
| 16 | Emden–Neue–Seeschleuse     | 41.6       | 40.42                                              | 3.67                        |
| 17 | Terneuzen                  | 41.5       | 8.67                                               | 3.33                        |
| 18 | Cadzand                    | 41.5       | 7.83                                               | 3.33                        |
| 19 | List                       | 41.1       | 17.75                                              | 3.33                        |
| 20 | Hamburg–St–Pauli           | 39.8       | 32.33                                              | 3.17                        |
| 21 | Hansweert                  | 38.6       | 9.25                                               | 3.50                        |
| 22 | Brunsbuettel–Mole4         | 36.3       | 17.75                                              | 3.67                        |
| 23 | Wierumergronden            | 35.4       | 13.75                                              | 3.50                        |
| 24 | Esbjerg                    | 35.1       | 12.88                                              | 3.75                        |
| 25 | Terschelling Noordzee      | 34.2       | 13.83                                              | 1.67                        |
| 26 | Kollmar                    | 33.6       | 18.50                                              | 3.83                        |
| 27 | Scheveningen               | 33.5       | 13.50                                              | 1.67                        |
| 28 | Huibertgat                 | 33.5       | 14.17                                              | 3.33                        |
| 29 | Hojer                      | 33.4       | 22.00                                              | 4.00                        |
| 30 | Zollenspieker              | 32.2       | 29.92                                              | 4.00                        |
| 31 | Zehnerloch                 | 32.0       | 16.00                                              | 2.83                        |
| 32 | LT–Alte–Weser              | 31.3       | 15.25                                              | 3.33                        |
| 33 | IJmuiden buitenhaven       | 30.9       | 35.25                                              | 3.17                        |
| 34 | Bergse Diepsluis west      | 30.7       | 35.17                                              | 4.00                        |
| 35 | Texel Noordzee             | 30.7       | 36.08                                              | 3.83                        |
| 36 | Glueckstadt                | 30.6       | 18.42                                              | 4.00                        |
| 37 | Knock                      | 30.4       | 40.17                                              | 3.83                        |
| 38 | Haringvliet 10             | 29.7       | 37.42                                              | 3.83                        |
| 39 | Dagebuell                  | 28.1       | 29.08                                              | 3.33                        |
| 40 | Aberdeen                   | 27.8       | 18.37                                              | 2.25                        |
| 41 | Scharhoern                 | 26.6       | 15.58                                              | 3.00                        |
| 42 | Dover                      | 26.6       | 30.50                                              | 4.00                        |
| 43 | Mittelgrund                | 26.4       | 4.33                                               | 3.83                        |
| 44 | Felixstowe                 | 25.9       | 19.38                                              | 3.25                        |
| 45 | Eemshaven                  | 25.5       | 38.75                                              | 2.83                        |

Table 4 (continued).

| N  | Station Name          | Range (cm) | Midpoint of Oscillation (h after start 3 Dec 1999) | Duration of Oscillation (h) |
|----|-----------------------|------------|----------------------------------------------------|-----------------------------|
| 46 | Den Helder            | 25.2       | 35.67                                              | 3.33                        |
| 47 | Den Oever buiten      | 25.0       | 36.83                                              | 3.33                        |
| 48 | Cromer                | 24.5       | 11.63                                              | 2.75                        |
| 49 | Cuxhaven–Steubenhoeft | 24.2       | 4.67                                               | 3.83                        |
| 50 | Sheerness             | 23.4       | 45.75                                              | 4.00                        |
| 51 | Leith                 | 23.3       | 20.00                                              | 3.50                        |
| 52 | Vlieland haven        | 23.1       | 20.67                                              | 1.67                        |
| 53 | Pellworm              | 23.0       | 42.08                                              | 3.67                        |
| 54 | Norderney–Riffgat     | 22.9       | 25.25                                              | 1.00                        |
| 55 | Lauwersoog            | 22.5       | 38.50                                              | 3.67                        |
| 56 | Havneby               | 22.1       | 22.50                                              | 4.00                        |
| 57 | Hoek van Holland      | 21.9       | 37.83                                              | 4.33                        |
| 58 | Immingham             | 21.6       | 16.50                                              | 3.00                        |
| 59 | Kornwerderzand buiten | 21.4       | 38.17                                              | 4.00                        |
| 60 | Lichteiland Goeree    | 21.0       | 37.25                                              | 3.83                        |
| 61 | Schiermonnikoog       | 20.7       | 15.83                                              | 3.67                        |
| 62 | Dunkerque             | 20.2       | 44.50                                              | 3.00                        |
| 63 | Calais                | 20.2       | 31.00                                              | 4.00                        |
| 64 | Nes                   | 19.9       | 15.42                                              | 3.50                        |
| 65 | Wittduen              | 19.8       | 17.83                                              | 1.83                        |
| 66 | Hoernum               | 19.5       | 27.17                                              | 2.50                        |
| 67 | Lowestoft             | 18.6       | 38.75                                              | 3.50                        |
| 68 | West–Terschelling     | 18.6       | 40.92                                              | 3.83                        |
| 69 | Rotterdam             | 18.4       | 35.25                                              | 3.50                        |
| 70 | Oudeschild            | 18.0       | 36.17                                              | 3.33                        |
| 71 | Krimpen a/d Lek       | 17.8       | 35.92                                              | 3.50                        |
| 72 | Borkum–Fischerbalje   | 17.7       | 38.75                                              | 3.00                        |
| 73 | K13a platform         | 16.9       | 18.00                                              | 3.00                        |
| 74 | Stavenisse            | 16.3       | 16.83                                              | 3.00                        |
| 75 | Spijkenisse           | 16.1       | 34.67                                              | 3.67                        |
| 76 | Vlaardingen           | 15.9       | 38.75                                              | 4.17                        |
| 77 | Dordrecht             | 15.7       | 36.00                                              | 3.00                        |
| 78 | Harlingen             | 15.4       | 25.42                                              | 4.17                        |
| 79 | Helgoland–Suedhafen   | 15.1       | 15.17                                              | 3.50                        |
| 80 | North Shields         | 14.6       | 19.50                                              | 3.00                        |
| 81 | Helgoland–Binnenhafen | 14.1       | 25.58                                              | 0.67                        |
| 82 | Whitby                | 13.4       | 9.00                                               | 1.00                        |
| 83 | Goidschalxoord        | 12.1       | 35.17                                              | 3.33                        |
| 84 | Lerwick               | 12.0       | 36.12                                              | 3.75                        |
| 85 | Schoonhoven           | 11.1       | 14.75                                              | 3.83                        |
| 86 | Stavanger             | 9.2        | 16.58                                              | 3.50                        |
| 87 | Tregde                | 6.1        | 24.83                                              | 3.33                        |
| 88 | Bergen                | 5.4        | 9.25                                               | 3.83                        |
| 89 | Malfoy                | 5.4        | 33.08                                              | 1.50                        |

SECTION XII. Range of water level variations across 10 minute intervals for the Germany data set

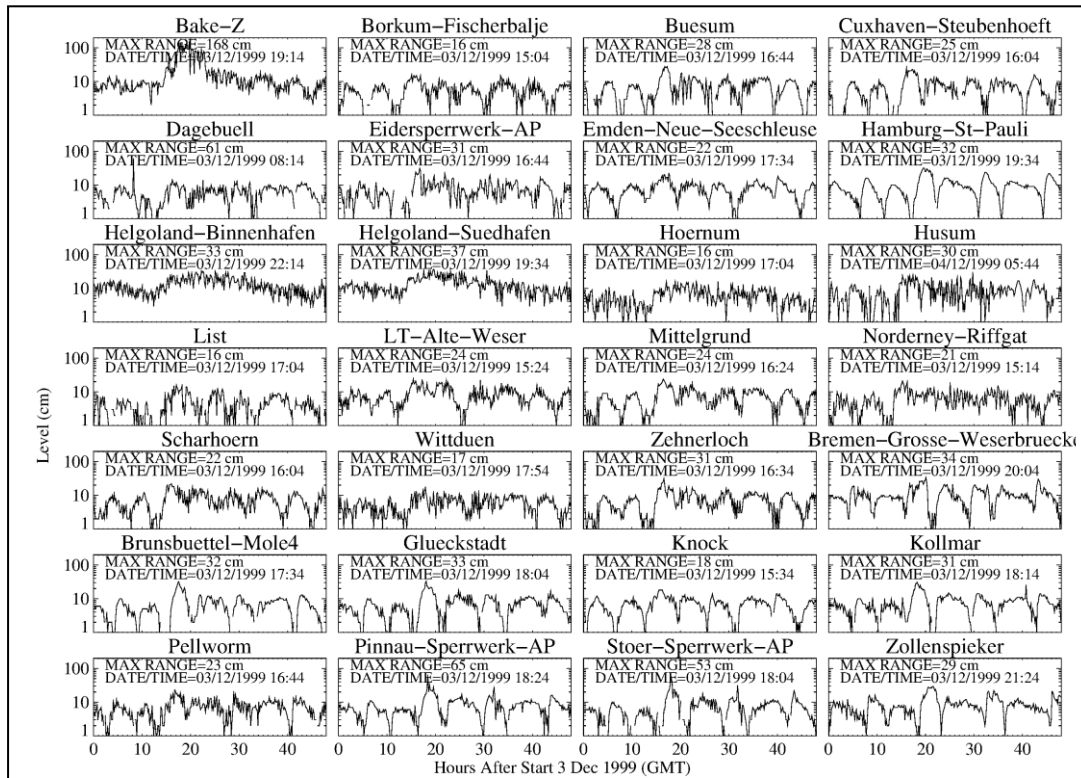

Figure S19. Range of water levels across 10-minute intervals, calculated from the original 1-minute time series data for Germany. The height data have been plotted on a log scale for presentation clarity. The high values for the Bake-Z station are probably erroneous. However, the capsizing of a lightship nearby suggests that there were extreme sea state conditions at the site. The data for this graph was sent by Wilfried Wiechmann (Bundesanstalt für Gewässerkunde).

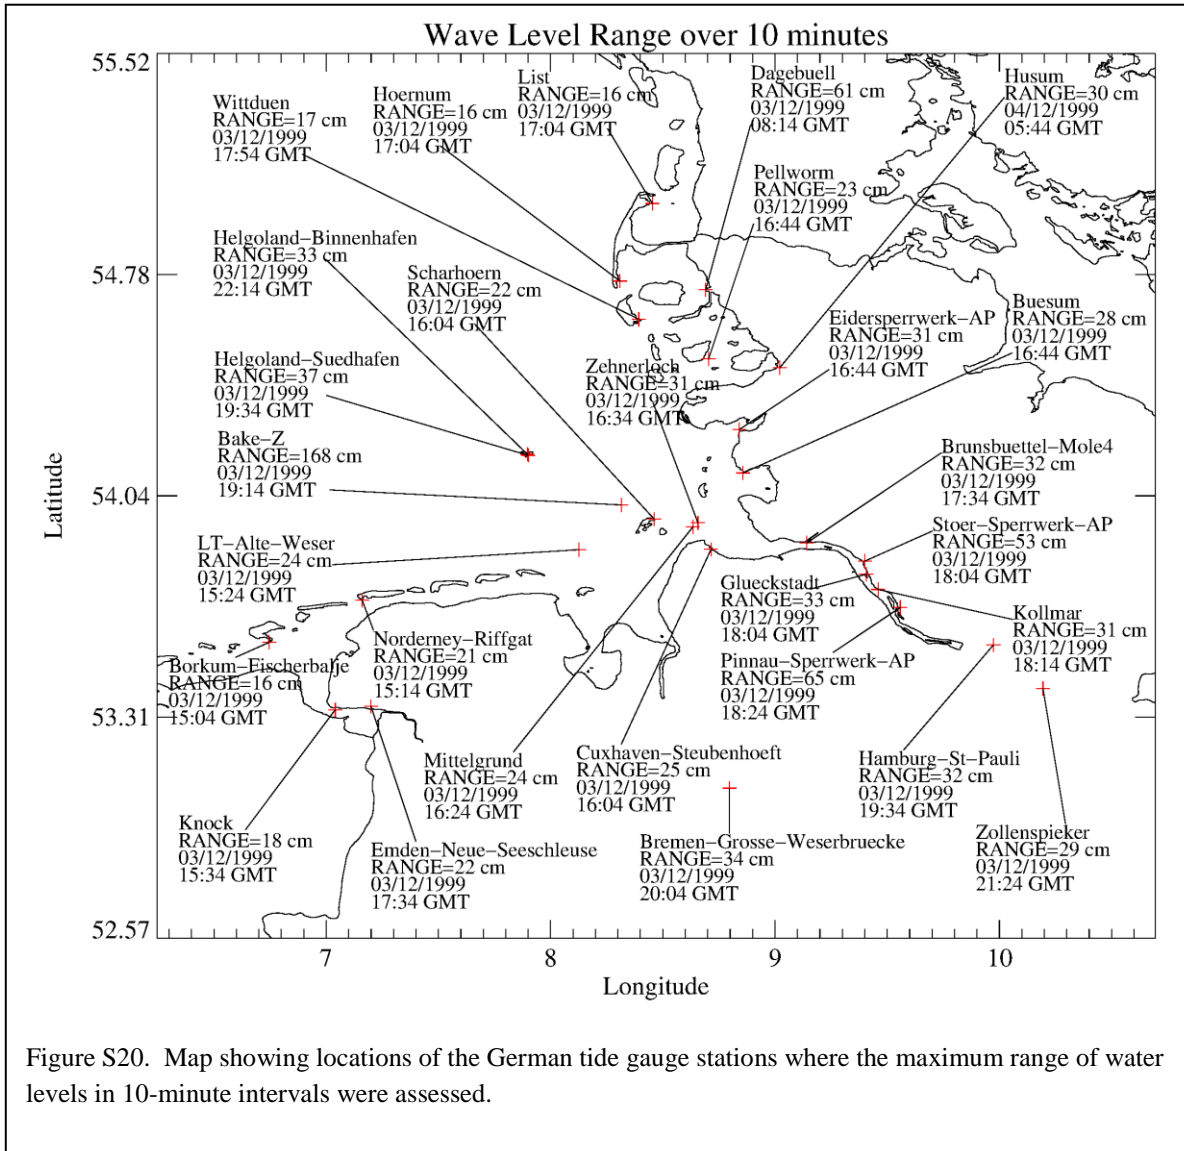

Figure S20. Map showing locations of the German tide gauge stations where the maximum range of water levels in 10-minute intervals were assessed.

## Bake-Z 1-minute Water Level Time Series

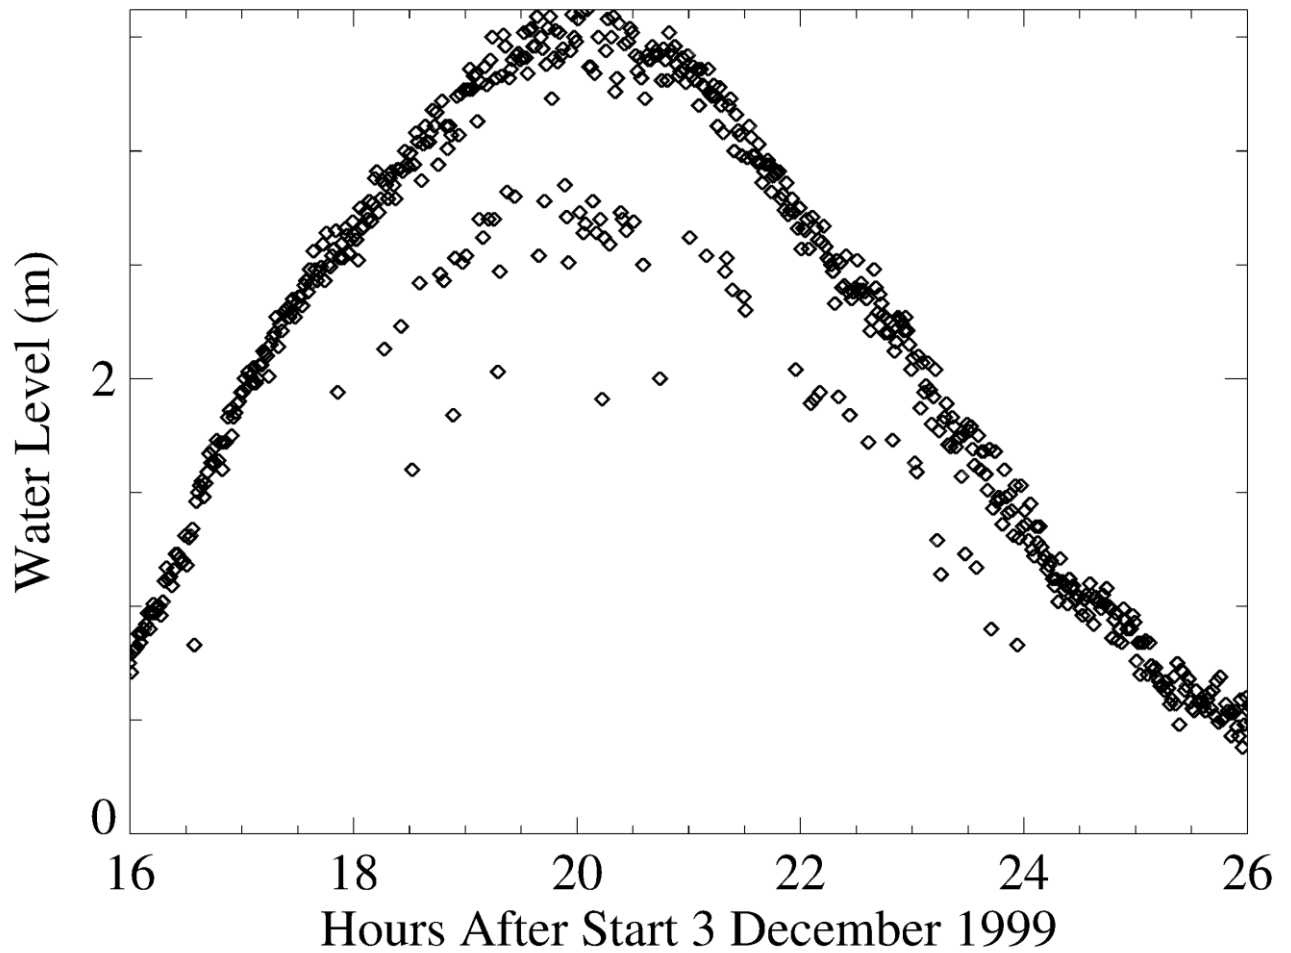

Figure S21. Water level at the Bake-Z tide gauge station at 1-minute intervals. The time series shows outliers with offsets in two clusters away from the likely true water level.

## SECTION XIII. Return period of water level heights reported and inferred from literature reports

Table S5. Sorted list of return periods of highest water levels during Storm Anatol 3–4 December 1999.

| N   | Location                | Country | Latitude (degree) | Longitude (degree) | Return Period (year) | Case    |
|-----|-------------------------|---------|-------------------|--------------------|----------------------|---------|
| [1] | [2]                     | [3]     | [4]               | [5]                | [6]                  | [7]     |
| 1   | Ribe                    | DK      | 55.30             | 8.70               | 196                  | 1:RP    |
| 2   | Ribe                    | DK      | 55.30             | 8.70               | 183                  | 3:RANK  |
| 3   | Bork Havn               | DK      | 55.80             | 8.30               | 140                  | 5:kdi18 |
| 4   | Ribe Kammersluse Flyder | DK      | 55.30             | 8.70               | 131                  | 5:kdi18 |
| 5   | Gradyb Barre            | DK      | 55.40             | 8.30               | 84                   | 5:kdi18 |
| 6   | Havneby Havn            | DK      | 55.10             | 8.60               | 53                   | 5:kdi18 |
| 7   | Husum                   | DE      | 54.47             | 9.02               | 53                   | 4:JEA06 |
| 8   | Esbjerg                 | DK      | 55.50             | 8.40               | 50                   | 1:RP    |
| 9   | Vidaa/Hojer             | DK      | 55.00             | 8.70               | 43                   | 1:RP    |
| 10  | Vidaslusen–Hojer I      | DK      | 55.00             | 8.70               | 35                   | 5:kdi18 |
| 11  | Esbjerg                 | DK      | 55.50             | 8.40               | 27                   | 5:kdi18 |
| 12  | Ballum                  | DK      | 55.10             | 8.70               | 25                   | 1:RP    |
| 13  | Ballum Sluse            | DK      | 55.10             | 8.70               | 23                   | 5:kdi18 |
| 14  | Cuxhaven                | DE      | 53.87             | 8.72               | 14                   | 4:JEA06 |
| 15  | Buesum                  | DE      | 54.12             | 8.87               | 13                   | 4:JEA06 |
| 16  | List auf Sylt           | DE      | 55.02             | 8.44               | 11                   | 4:JEA06 |
| 17  | Hvide Sand              | DK      | 56.00             | 8.10               | 9.0                  | 1:RP    |
| 18  | Skagen                  | DK      | 57.70             | 10.60              | 5.9                  | 5:kdi18 |
| 19  | Kloster Havn            | DK      | 56.30             | 8.30               | 5.4                  | 5:kdi18 |
| 20  | Havneby                 | DK      | 55.10             | 8.60               | 5.0                  | 1:RP    |
| 21  | Hvide Sande Havet       | DK      | 56.00             | 8.10               | 4.3                  | 5:kdi18 |
| 22  | Hals                    | DK      | 57.00             | 10.30              | 3.5                  | 5:kdi18 |
| 23  | Delfzijl                | NE      | 53.33             | 6.93               | 3.0                  | 2:FREQ  |
| 24  | Thorsminde              | DK      | 56.37             | 8.12               | 3.0                  | 1:RP    |
| 25  | Bremerhaven             | DE      | 53.55             | 8.57               | 2.9                  | 4:JEA06 |
| 26  | Norderney               | DE      | 53.70             | 7.15               | 2.4                  | 3:RANK  |
| 27  | Thyboren                | DK      | 56.70             | 8.22               | 2.0                  | 1:RP    |
| 28  | Hvide Sande Havn        | DK      | 56.00             | 8.10               | 1.7                  | 5:kdi18 |
| 29  | Ringkobing Havn         | DK      | 56.10             | 8.20               | 1.5                  | 5:kdi18 |
| 30  | Dagebuell               | DE      | 54.73             | 8.68               | 1.5                  | 4:JEA06 |
| 31  | Den Helder              | NE      | 52.97             | 4.75               | 1.3                  | 2:FREQ  |
| 32  | Harlingen               | NE      | 53.17             | 5.42               | 1.2                  | 2:FREQ  |
| 33  | Randers Havn            | DK      | 56.50             | 10.00              | 1.2                  | 5:kdi18 |
| 34  | Hirtshals               | DK      | 57.60             | 10.00              | 0.98                 | 5:kdi18 |
| 35  | Norderney               | DE      | 53.70             | 7.15               | 0.96                 | 4:JEA06 |

Table S5 (continued).

| N   | Location              | Country | Latitude (degree) | Longitude (degree) | Return Period (year) | Case    |
|-----|-----------------------|---------|-------------------|--------------------|----------------------|---------|
| [1] | [2]                   | [3]     | [4]               | [5]                | [6]                  | [7]     |
| 36  | Hoek van Holland      | NE      | 51.98             | 4.12               | 0.91                 | 2:FREQ  |
| 37  | Helgoland Binnenhafen | DE      | 54.18             | 7.88               | 0.70                 | 4:JEA06 |
| 38  | Roompot buiten        | NE      | 51.62             | 3.67               | 0.59                 | 2:FREQ  |
| 39  | Hanstholm             | DK      | 57.10             | 8.60               | 0.53                 | 5:kdi18 |
| 40  | Nr. Sundby            | DK      | 57.10             | 9.90               | 0.42                 | 5:kdi18 |
| 41  | Vlissingen            | NE      | 51.45             | 3.60               | 0.32                 | 2:FREQ  |
| 42  | Emden                 | DE      | 53.33             | 7.18               | 0.25                 | 4:JEA06 |
| 43  | Dordrecht             | NE      | 51.82             | 4.67               | 0.24                 | 2:FREQ  |
| 44  | Ferring               | DK      | 56.50             | 8.10               | 0.19                 | 5:kdi18 |
| 45  | Skive Havn            | DK      | 56.60             | 9.10               | 0.16                 | 5:kdi18 |
| 46  | Juelsminde Havn       | DK      | 55.70             | 10.00              | 0.08                 | 5:kdi18 |
| 47  | Hvalpsund             | DK      | 56.70             | 9.20               | 0.07                 | 5:kdi18 |
| 48  | Attrup                | DK      | 57.00             | 9.50               | 0.03                 | 5:kdi18 |

## Notes:

[1] Running index of data

[2] Station name

[3] Country

[4] Latitude

[5] Longitude

[6] Calculated return period in years

[7] Description of calculation:

1: RP: return period presented in source

2: FREQ: source presents number of exceedances within a time interval; return period is taken as reciprocal

3: RANK: source presents rank of water level across a date range; return period is calculated as the number of years represented divided by the rank.

4: JEA06: Jensen et al (2006) present the maximum water levels during Storm Anatol and tabulated values of standardized return periods versus water level that were interpolated to derive the return periods for the Storm Anatol case [Jensen J, C Mudersbach, SH Mueller-Navarra, I Bork, C Koziar, V Renner, Modellgestuetzte Untersuchungen zu Sturmfluten mit sehr geringen Eintrittswahrscheinlichkeiten an der deutschen Nordseekueste, Die Kueste, 71, 123-167, 2006.]

5: kdi18: Ditlevsen et al (2018) present the maximum water levels during Storm Anatol and tabulated values of standardized return periods versus water level that were interpolated to derive the return periods for the Storm Anatol case [Ditlevsen C, MM Ramos, C Sorensen, UR Ciocan, T Pionkowitz, Hojvandsstatistikker 2017, Miljo- og Foedevareministeriet, Kystdirektoratet Lemvig, Februar, 2018]

SECTION XIV. Timing of the tide, surge, extreme oscillations, and maritime incidents around the North Sea coast

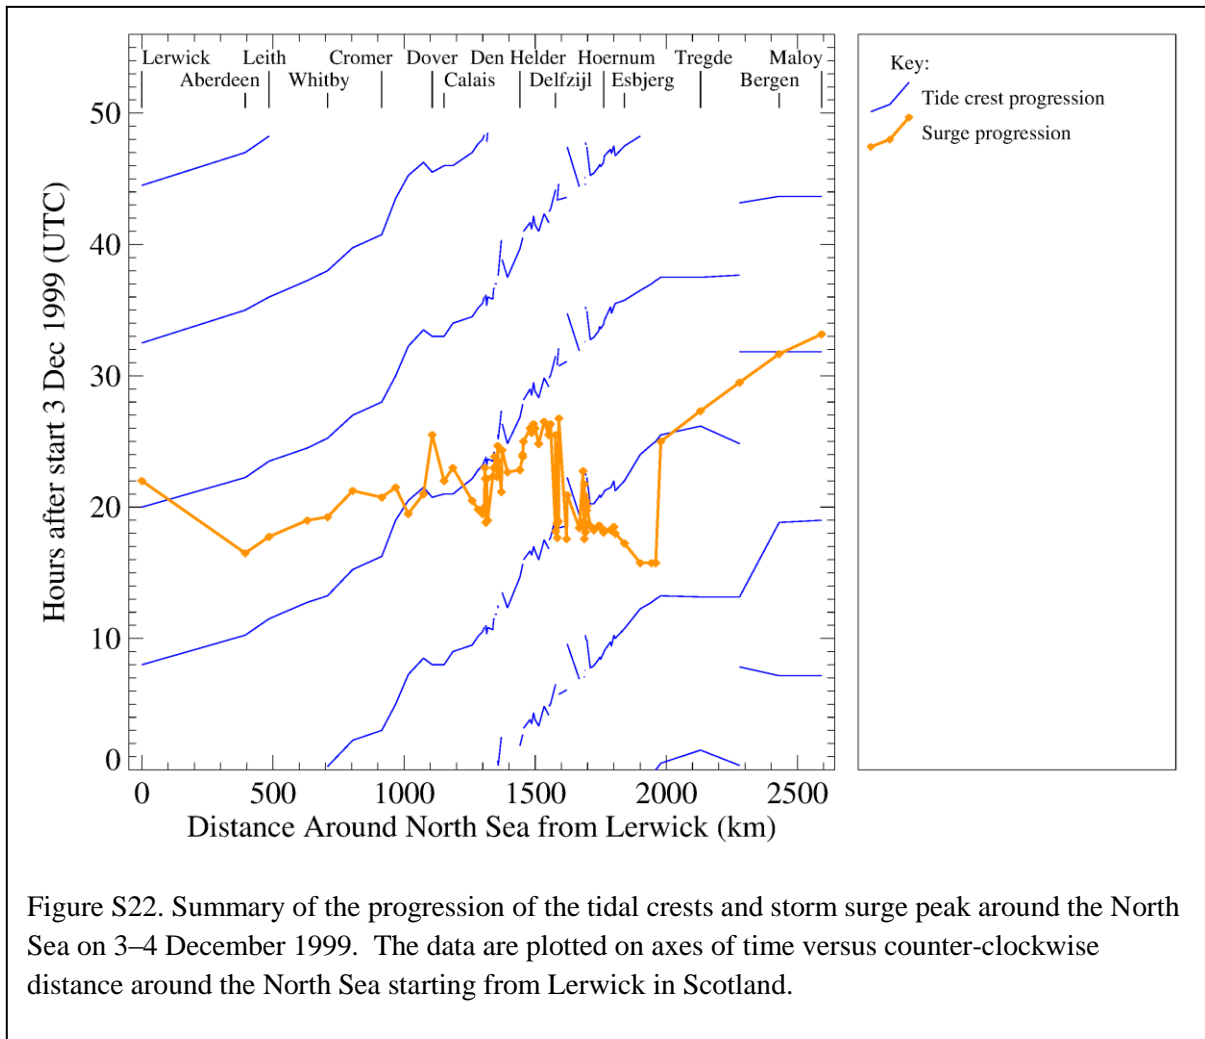



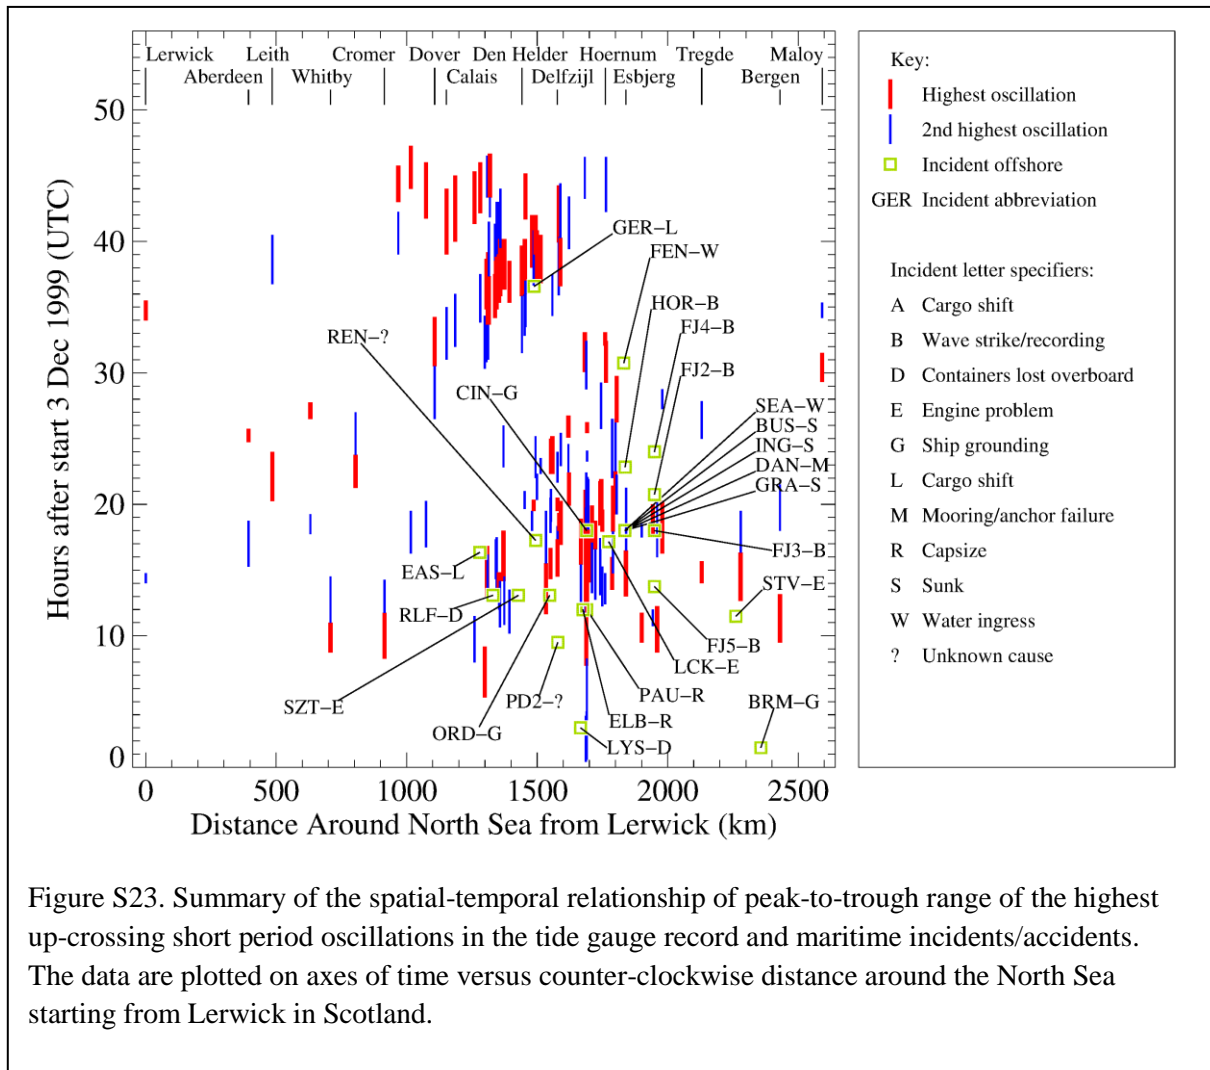

Figure S23. Summary of the spatial-temporal relationship of peak-to-trough range of the highest up-crossing short period oscillations in the tide gauge record and maritime incidents/accidents. The data are plotted on axes of time versus counter-clockwise distance around the North Sea starting from Lerwick in Scotland.

## SECTION XV. Literature source reports tabulated by theme and information content

Table SL0. Master list of tables in working notes

| Content                                                                                                                                                                      |
|------------------------------------------------------------------------------------------------------------------------------------------------------------------------------|
| Table SL1. List of sources reviewed for project (arranged by year and then alphabetically)                                                                                   |
| Table SL2. List of sources that could not be obtained (alphabetically)                                                                                                       |
| Table SL3. List of normal photos of event (arranged by year and then alphabetically)                                                                                         |
| Table SL4. Ranking of storm among events; assessing importance of storm (arranged by year and then alphabetically)                                                           |
| Table SL5. Severe forecast (arranged by year and then alphabetically)                                                                                                        |
| Table SL6. Storm not as bad as expected; not as bad as it could have been (arranged by year and then alphabetically)                                                         |
| Table SL7. Storm worse than expected (arranged by year and then alphabetically)                                                                                              |
| Table SL8. Storm duration; extended period bad weather (arranged by year and then alphabetically)                                                                            |
| Table SL9. Names of the storm (arranged by year and then alphabetically)                                                                                                     |
| Table SL10. Satellite pictures (arranged by year and then alphabetically)                                                                                                    |
| Table SL11. Meteorological maps or surface analysis (arranged by year and then alphabetically)                                                                               |
| Table SL12. Model fields (arranged by year and then alphabetically)                                                                                                          |
| Table SL13. Satellite altimeter strip maps (arranged by year and then alphabetically)                                                                                        |
| Table SL14. List meteorological data (arranged by year and then alphabetically)                                                                                              |
| Table SL15. Significant wave height and sea state (arranged by year and then alphabetically)                                                                                 |
| Table SL16. Wave period and other wave data (arranged by year and then alphabetically)                                                                                       |
| Table SL17. Surge reports and quantitative water levels (arranged by year and then alphabetically)                                                                           |
| Table SL18. Water current information (arranged by year and then alphabetically)                                                                                             |
| Table SL19. Return period of water level; ranking of water level                                                                                                             |
| Table SL20. Return period of wind speed; ranking of wind speed                                                                                                               |
| Table SL21. Storm trajectory map (arranged by year and then alphabetically)                                                                                                  |
| Table SL22. Unusual pressure drop; time series central pressure; explosive characteristics; bomb (arranged by year and then alphabetically)                                  |
| Table SL23. Low level jet                                                                                                                                                    |
| Table SL24. Sting Jet                                                                                                                                                        |
| Table SL25. Radiosonde analysis                                                                                                                                              |
| Table SL26. Stable atmospheric boundary layer                                                                                                                                |
| Table SL27. Strong jet stream                                                                                                                                                |
| Table SL28. Squall line, convective thunderstorms, tornadoes (arranged by year and then alphabetically)                                                                      |
| Table SL29. Lightning (arranged by year and then alphabetically)                                                                                                             |
| Table SL30. Meso-vortex (arranged by year and then alphabetically)                                                                                                           |
| Table SL31. Meteotsunami and unusual surges (arranged by year and then alphabetically)                                                                                       |
| Table SL32. Hurricane gusts only on south (right) side of pressure center (arranged by year and then alphabetically)                                                         |
| Table SL33. Culmination time and location determines damage properties of storm                                                                                              |
| Table SL34. Infragravity wave, rogue wave, green water incidents (arranged by year and then alphabetically)                                                                  |
| Table SL35. Wave dynamics and dike breaches; wave runoff studies (arranged by year and then alphabetically)                                                                  |
| Table SL36. Precipitation, river level dike breaches (arranged by year and then alphabetically)                                                                              |
| Table SL37. Unusual peak of significant wave height in northern North Sea (arranged by year and then alphabetically)                                                         |
| Table SL38. Double surge peak from wind and travelling wave (arranged by year and then alphabetically)                                                                       |
| Table SL39. Very low water levels (arranged by year and then alphabetically)                                                                                                 |
| Table SL40. Modelled turbulence kinetic energy in ocean wave model (arranged by year and then alphabetically)                                                                |
| Table SL41. Classification of storm surges (arranged by year and then alphabetically)                                                                                        |
| Table SL42. Fatalities & injuries                                                                                                                                            |
| Table SL43. Coastal flooding, dike breaks, and evacuations (arranged by year and then alphabetically)                                                                        |
| Table SL44. Coastal dike heights and protection levels (arranged by year and then alphabetically)                                                                            |
| Table SL45. Surge barrier closures (arranged by year and then alphabetically)                                                                                                |
| Table SL46. Beach damage and coastal issues; salt water contamination of groundwater; sewer systems (arranged by year and then alphabetically)                               |
| Table SL47. Power interruptions (arranged by year and then alphabetically)                                                                                                   |
| Table SL48. List bridge closures, cancelled ferry crossings, port closures, airport cancel, rail interruptions, traffic accidents (arranged by year and then alphabetically) |
| Table SL49. Structural damage to wind farms and wind energy impacts (arranged by year and then alphabetically)                                                               |
| Table SL50. Hydropower impacts (arranged by year and then alphabetically)                                                                                                    |
| Table SL51. Structural damage to buildings, piers, and cultural monuments (arranged by year and then alphabetically)                                                         |
| Table SL52. Forest damage and tree falls (arranged by year and then alphabetically)                                                                                          |
| Table SL53. General ship/rig emergency reports/offshore incidents/platform evacuations (arranged by year and then alphabetically)                                            |
| Table SL54. Instrument failures during storm (arranged by year and then alphabetically)                                                                                      |
| Table SL55. Nonhomogeneous data sets (arranged by year and then alphabetically)                                                                                              |
| Table SL56. Climatological background of storm; unusual preceding weather events (arranged by year and then alphabetically)                                                  |
| Table SL57. Storm timing compared with spring tide; phase of surge and tide (arranged by year and then alphabetically)                                                       |
| Table SL58. Tide analysis (arranged by year and then alphabetically)                                                                                                         |
| Table SL59. Data filtering and discretization issues (arranged by year and then alphabetically)                                                                              |
| Table SL60. Difficulties in meteorological model of storm (arranged by year and then alphabetically)                                                                         |
| Table SL61. Difficulties in modelling water levels and surge (arranged by year and then alphabetically)                                                                      |
| Table SL62. Future sea level rise and flooding effects; future climate and storm return period (arranged by year and then alphabetically)                                    |
| Table SL63. Storm event as manifestation of climate change (arranged by year and then alphabetically)                                                                        |
| Table SL64. Baltic Sea events (arranged by year and then alphabetically)                                                                                                     |
| Table SL65. Aftermath: new defenses; new design criteria; assessment of climate change; model problems (arranged by year and then alphabetically)                            |
| Table SL66. Worst case storm surge situation (arranged by year and then alphabetically)                                                                                      |
| Table SL67. Damage costs; insurance losses (arranged by year and then alphabetically)                                                                                        |

Table SL68. Online data sets (arranged by year and then alphabetically)  
 Table SL69. Onshore/offshore wind energy policy and historical development  
 Table SL70. Context and background information where storm not mentioned (arranged by year and then alphabetically)  
 Table SL71. Errors/typos in source reports for storm (arranged by year and then alphabetically)  
 Table SL72. Abbreviations used in manuscript (arranged by year and then alphabetically)  
 Table SL73. People contacted for information about storm (arranged by year and then alphabetically)

Table SL1. List of sources reviewed for project (arranged by year and then alphabetically)

| Source                                       | Type <sup>1</sup> | Full Reference and Notes                                                                                                                                                                                                                                                                                                                                                                             |
|----------------------------------------------|-------------------|------------------------------------------------------------------------------------------------------------------------------------------------------------------------------------------------------------------------------------------------------------------------------------------------------------------------------------------------------------------------------------------------------|
| Rossiter (1958)                              | 4                 | Rossiter JR, Storm surges in the North Sea, 11 to 30 December 1954, Philosophical Transactions of the Royal Society of London, Series A, 251, No. 991, 139-160, 1958.                                                                                                                                                                                                                                |
| Keers (1966)                                 | 4                 | Keers, JF, The meteorological conditions leading to storm surges in the North Sea, Meteorological Magazine, London, 95, (1130), 261-272, Sept. 1966                                                                                                                                                                                                                                                  |
| Whitehouse (1977)                            | 4                 | Whitehouse, P., Wave Phenomenon in the North Sea, The Marine Observer, XLVII, No. 257, pp.128-129, July 1977 (Met.O. 904)                                                                                                                                                                                                                                                                            |
| Hogben (1994)                                | 4                 | Hogben, N, Increases in wave heights over the North Atlantic: A review of the evidence and some implications for the naval architect, Transactions of The Royal Institution of Naval Architects, W5, 93-101, 1994.                                                                                                                                                                                   |
| Neu (1984)                                   | 4                 | Neu HJA, Interannual variations and longer-term changes in sea state of the North Atlantic from 1970 to 1982, JGR, 89, 6397-6402, 1984.                                                                                                                                                                                                                                                              |
| Carter (1988)                                | 4                 | Carter DJT and L Draper, Has the north-east Atlantic become rougher? Nature, 332, p.494. 1988.                                                                                                                                                                                                                                                                                                       |
| Schmidt and von Storch (1993)                | 4                 | Schmidt H and H von Storch, German Bight storms analyzed, Nature, 343,791, 1993                                                                                                                                                                                                                                                                                                                      |
| Logue (1989)                                 | 4                 | Logue JJ, The estimation of extreme wind speeds over standard terrain in Ireland, Technical Note No. 51, Meteorological Service, Dublin, May 1989                                                                                                                                                                                                                                                    |
| Alexandersson et al (1998)                   | 4                 | Alexandersson H, T Schmith, K Iden, H Tuomenvirta, Long-term variations of the storm climate over NW Europe, The Global Atmosphere and Ocean System, 6, 97-120, 1998                                                                                                                                                                                                                                 |
| Schmith et al (1998)                         | 4                 | Schmith T, E Kaas, TS Li, Northeast Atlantic winter storminess 1875-1995 re-analyzed, Climate Dynamics, 14, 529-536, 1998.                                                                                                                                                                                                                                                                           |
| Brugge (1999)                                | 1                 | Brugge, Roger, Weather Diary, Dec 1999 <a href="http://www.met.reading.ac.uk/~brugge/diary1999.html#1299">www.met.reading.ac.uk/~brugge/diary1999.html#1299</a>                                                                                                                                                                                                                                      |
| DMI (19991209)                               | 1                 | DMI, Rapport. Orkanen over Danmark den 3.-4. december 1999, Danmarks Meteorologiske Institut, Lyngbyvej 100, DK-2100 København O, 9Dec1999.                                                                                                                                                                                                                                                          |
| Focus (1999)                                 | 1                 | Focus, Strandfresser Anatol. Nr.50, 1999 (correspondent Birte Siedenburg), <a href="https://www.focus.de/politik/deutschland/sylt-strandfresser-anatol_aid_178994.html">https://www.focus.de/politik/deutschland/sylt-strandfresser-anatol_aid_178994.html</a>                                                                                                                                       |
| Hjorteland et al (1999)                      | 4                 | Hjorteland K, MJ Mes, AK Magnusson, Ekofisk Observed Weather Compared with Weather Predictions, Offshore Technology Conference, 3-6May, Houston, Texas, 1999, OTC-10768-MS                                                                                                                                                                                                                           |
| Kristeligt Dagblad (1999)                    | 1                 | Kristeligt Dagblad, Orkan haergede landet over. Paa vestkysten naede vindstyrken op pa 47 sekundmeter, 4Dec1999 00:00                                                                                                                                                                                                                                                                                |
| Land Schleswig-Holstein (1999)               | 1                 | Land Schleswig-Holstein, Sturmflutereignis am 03.12.1999 (Wasserstaende an Pegelmessstellen), Amt fuer laendliche Raeume, Husum, Az.: 5621, document sent by Maria Bluemel 09Sep2020                                                                                                                                                                                                                 |
| Lloyd's Casualty Week (19991210)             | 4                 | Lloyds Casualty Week, vol.318, No.11, Dec10, 1999                                                                                                                                                                                                                                                                                                                                                    |
| Lloyd's Casualty Week (19991217)             | 3                 | Lloyds Casualty Week, vol318, No12, 17Dec1999                                                                                                                                                                                                                                                                                                                                                        |
| Met Eireann (199912)                         | 3                 | Met Eireann, Monthly Weather Bulletin, no. 164, Dec, 1999                                                                                                                                                                                                                                                                                                                                            |
| Norwegian Petroleum Directorate (1999)       | 4                 | Norwegian Petroleum Directorate, Offshore Norway 1999, Norwegian Petroleum Directorate, Prof. Olav Hanssens vei 10, P.O. Box 600, 4003 Stavanger, Norway [pdf document properties: datestamp: 24Jan2019]                                                                                                                                                                                             |
| RWS (1999)                                   | 1                 | RWS, Verslag van de Stormvloed can 3 en 4 december 1999 (SR79), Ministerie van VerKeer en Waterstaat, Directoraat-Generaal Rijkswaterstaat, Rijksinstituut voor Kust en Zee, Stormvloedwaarschuwingsdienst, Postbus 20907, 2500EX 's-Gravenhage, 's-Gravenhage, december 1999.                                                                                                                       |
| UKMO (1999)                                  | 1                 | UKMO, Daily Weather Summary, 26Nov1999 to 05Dec1999                                                                                                                                                                                                                                                                                                                                                  |
| Vedin and Alexandersson (1999)               | 1                 | Vedin, Haldo and Hans Alexandersson, Aarhunderadets storm? Vaader och Vatten, p.18, Dec, 1999                                                                                                                                                                                                                                                                                                        |
| Winther-Jensen and Jorgensen (1999)          | 4                 | Winther-Jensen, M and ER Jorgensen, When real life wind speed exceeds design wind assumptions, 1999 European Wind Energy Conference, 1-5 March 1999, Nice, France pp.220-223.                                                                                                                                                                                                                        |
| Aakjaer (2000)                               | 3                 | Aakjaer AF, Orkanen i Nordsøen den 30. oktober 2000, Vejret, 85, 1-7, 2000                                                                                                                                                                                                                                                                                                                           |
| Bancroft (2000)                              | 3                 | Bancroft, George P., Marine Weather Review - North Atlantic Area September through December 1999, Mariners Weather Log, Vol.44, No.1, April 2000. pp.23-38.                                                                                                                                                                                                                                          |
| Bell et al. (2000)                           | 3                 | Bell GD, MS Halpert, RS Schnell, RW Higgins, J Lawrimore, VE Kousky, R Tinker, W Thlaw, M Chelliah, A Arthusa, Climate Assessment for 1999, Bulletin of the American Meteorological Society, 81, S1-S50, 2000                                                                                                                                                                                        |
| Beredskapsstyrelsen Udviklingsenheden (2000) | 1                 | Beredskapsstyrelsen Udviklingsenheden, Den Samlede redningsberedskabssektors opgaveløsning i forbindelse med orkanen d. 3.-4. december og stormen d. 17 december 1999 - En Tvaergaende evaluering og erfaringsopsamling. Februar 2000, Beredskabsstyrelsen, Beredskabsudviklingsenheden, Datavej 16, 3460 Birkerød, Telefon: 4590 6000, Telefax: 4590 6060, E-mail: bue@brs.dk, Internet: www.brs.dk |
| Bresch et al (2000)                          | 3                 | Bresch DN, M Bisping, G Lemcke, Storm over Europe. An underestimated risk, Swiss Re (Swiss Reinsurance Company), 27pp, 2000.                                                                                                                                                                                                                                                                         |
| DGZRS                                        | 4                 | DGZRS, "Fischkutter brennt" Eiswette bringt die "Jente" und drei Mann in Sicherheit, Jahrbuch 2000, Deutsche Gesellschaft zur Rettung Schiffbruechiger, Hamburg, pp6-7, 2000.                                                                                                                                                                                                                        |
| Ersdal and Kvitrud (2000)                    | 4                 | Ersdal G and A Kvitrud, Green water on Norwegian production ships, Proceedings of the tenth (2000) International Offshore and Polar Engineering Conference, Seattle, USA, May 28- June 2, 2000, The International Society of Offshore and Polar Engineers, 2000                                                                                                                                      |

|                                       |   |                                                                                                                                                                                                                                                                                                                                                                                                                                                                 |
|---------------------------------------|---|-----------------------------------------------------------------------------------------------------------------------------------------------------------------------------------------------------------------------------------------------------------------------------------------------------------------------------------------------------------------------------------------------------------------------------------------------------------------|
| Kristensen et al (2000)               | 3 | Kristensen L, O Rathmann, SO Hansen, Extreme wind in Denmark, Journal of Wind Engineering and Industrial Aerodynamics, 87, 147-166, 2000.                                                                                                                                                                                                                                                                                                                       |
| Forestry Commission (2000)            | 1 | Forestry Commission, Naar skoven blaeser omkuld, Vejret, 85, pp.8-9, Dec, 2000                                                                                                                                                                                                                                                                                                                                                                                  |
| Lemcke and Schibli (2000)             | 4 | Lemcke G and F Schibli, Storm over Europe - an underestimated risk, 10Oct2000CET press release. [pdf document properties: 19Jul2007]                                                                                                                                                                                                                                                                                                                            |
| Mann and Hansen (2000)                | 1 | Mann AJ, SO Hansen, En storm gor ingen norm, Vejret, no1. 22.Argang, 82, pp.28-34, Februar 2000.                                                                                                                                                                                                                                                                                                                                                                |
| Neckelmann and Petersen (2000)        | 3 | Neckelmann, S. and J. Petersen, Evaluation of the stand-alone wind and wave measurement systems for Horns Rev 150MW offshore wind farm in Denmark, OWEMES 2000, ATENA, Rome, Sicily, pp.17-27, 2000                                                                                                                                                                                                                                                             |
| Nielsen and Nielsen (2000)            | 1 | Nielsen, Jacob Woge and Nielsen, Mads Hvid, Stormfloden foraarsaget af orkanen den 3. december 1999, Vejret, 82, 8-14, Februar 2000                                                                                                                                                                                                                                                                                                                             |
| Rosenorn (2000a)                      | 2 | Rosenorn, Af Stig, De kraftigste storme i det tyvende aarhundrede in Denmark, Vejret, 82, 15-18, Februar 2000a                                                                                                                                                                                                                                                                                                                                                  |
| Rosenorn (2000b)                      | 4 | Rosenorn, Af Stig, Efteraarsvejret 1999, Vejret, 82, No1., 22 Aargang, pp. 24-27, Februar, 2000b.                                                                                                                                                                                                                                                                                                                                                               |
| UN/ECE (2000)                         | 1 | UN/ECE Timber Committee, Chapter 3. Effects of the December 1999 storms on European timber markets, ECE/FAO Forest Products Annual Market Review, 1999-2000, 15pp, 2000, Timber Bulletin, Vol LIII, ECE/TIM/BULL/53/3 [pdf document properties: title=3stormdamageFIN.PDF; author=najera; datestamp=15/08/2000] <a href="https://www.unece.org/fileadmin/DAM/timber/docs/rev-00/rev00.htm">https://www.unece.org/fileadmin/DAM/timber/docs/rev-00/rev00.htm</a> |
| Voldberg (2000)                       | 1 | Voldberg Henrik, Vredens julemaaned, Vejret, 82, no.1, 1-7, Feb, 2000.                                                                                                                                                                                                                                                                                                                                                                                          |
| Woetmann Nielsen (2000)               | 1 | Woetmann Nielsen, AN, DMI-HIRLAM's forudsigelse af orkanen den 3.december 1999. Vejret, 82, pp. 19-23, februar 2000.                                                                                                                                                                                                                                                                                                                                            |
| BOMEL (2001)                          | 4 | BOMEL Limited, Analysis of green water susceptibility of FPSO/FSUs on the UKCS, HSE Health and Safety Executive, Offshore Technology Report 2001/005, 38pp                                                                                                                                                                                                                                                                                                      |
| Buizza and Hollingsworth (2001)       | 2 | Buizza, Roberto and Anthony Hollingsworth, Severe weather prediction using the ECMWF EPS - The European Storms of December 1999, ECMWF Newsletter, No. 89, Winter 2000/01.                                                                                                                                                                                                                                                                                      |
| IEA (2001)                            | 3 | IEA, Wind Energy Annual Report 2000, International Energy Agency, National Renewable Energy Laboratory, May, 2001. (Author Ian Fletcher) pdf document properties: datestamp: 08Jul2005;                                                                                                                                                                                                                                                                         |
| Leonhardsen et al (2001)              | 4 | Leonhardsen RL, G Ersdal, A Kvitrud, Experience and risk assessment of FPSOs in use on the Norwegian Continental Shelf. Description of Events, The Eleventh International Offshore and Polar Engineering Conference, International Society of Offshore and Polar Engineerings, 2001. 6pp. Paper No. 2001-IL-05 [pdf document datastamp=08Apr2001]                                                                                                               |
| Magnusson and Donelan (2001)          | 4 | Magnusson AK and MA Donelan, Extremes from evolved waves using measurements from a waverider buoy and vertical lasers, M Olagnon, GA Athanasoulis (ed), (2001) Rogue waves 2000: Proceedings of a Workshop in Brest, France, 29-30 November 2000. Actes de Colloques - IFREMER, 32. Editions IFREMER: Plouzane, ISBN 2-84433-063-0.X, 395pp, pp.141-150, 2001.                                                                                                  |
| Schmidt (2001)                        | 4 | Schmidt H, Die Entwicklung der Sturmhaufigkeit in der Deutschen Bucht zwischen 1878 und 2000. Klimastatusbericht 2001, DWD. pp199-205.                                                                                                                                                                                                                                                                                                                          |
| Ulblich et al. (2001)                 | 2 | Ulblich U, AH Fink, M Klawa, JG Pinto, Three extreme storms over Europe in December 1999, Weather 56, 70-80, 2001                                                                                                                                                                                                                                                                                                                                               |
| Buizza and Hollingsworth (2002)       | 2 | Buizza, Roberto and Anthony Hollingsworth, Storm prediction over Europe using the ECMWF ensemble prediction system, Meteorol. Appl., 9, 2002                                                                                                                                                                                                                                                                                                                    |
| DWD (20020528)                        | 1 | DWD, Orkantief 'Anatol' von 3./4. Dezember 1999 (5pp), <a href="https://www.dwd.de/DE/leistungen/besondereereignisse/stuerme/19991204_orkantief_anatol.pdf">https://www.dwd.de/DE/leistungen/besondereereignisse/stuerme/19991204_orkantief_anatol.pdf</a> [pdf document properties: datestamp: 28May2002]                                                                                                                                                      |
| DWD (20020528b)                       | 2 | DWD, Klimatologische Bewertung der juensten Stark-Windereignisse (Anatol und Lothar) aus der Sicht der Klimatologie der freien Atmosphaere, [pdf document properties: 28/05/2002]                                                                                                                                                                                                                                                                               |
| Faulkner (2002)                       | 4 | Faulkner, D., Shipping safety. A matter of concern, Ingenia, Royal Academy of Engineering, London (August/September), 13, 13-20, 2002                                                                                                                                                                                                                                                                                                                           |
| HSE (2002b)                           | 4 | HSE Health and Safety Executive, Floating Installations, Offshore Technology Report 2001/048, 2002                                                                                                                                                                                                                                                                                                                                                              |
| HSE (2002c)                           | 3 | HSE, An investigation of storm incidents in UK waters, Prepared by the Met Office for the Health and Safety Executive, Offshore Technology Report 2001/078, 2002c.                                                                                                                                                                                                                                                                                              |
| Munich Re (2002)                      | 2 | Munich Re, Winter Storms in Europe (II), Analysis of 1999 losses and loss potentials, Muenchener Rueck, Munich Re Group, 76pp, 2002                                                                                                                                                                                                                                                                                                                             |
| Sommer (2002)                         | 3 | Sommer A, Wind Resources at Horns Rev, Eltra PSO-2000 Proj nr. EG-05 3248, Tech-wise, 2002.                                                                                                                                                                                                                                                                                                                                                                     |
| Buchner (2003)                        | 4 | Buchner, Bas, Floaters challenged by waves, Offshore, 01Jun2003, <a href="https://www.offshore-mag.com/rigs-vessels/article/16755452/floaters-challenged-by-waves">https://www.offshore-mag.com/rigs-vessels/article/16755452/floaters-challenged-by-waves</a>                                                                                                                                                                                                  |
| Jung et al (2003)                     | 4 | Jung T, E Klinker, S Uppala, 10. Reanalysis and reforecast of three major European storms of the 20th century using the ECMWF forecasting system, ERA-40 Project Report Series, 33pp, November, 2003.                                                                                                                                                                                                                                                           |
| Mueller-Navarra et al (2003)          | 1 | Mueller-Navarra SH, W Lang, S Dick, KC Soetje, Ueber de Verfahren der Wasserstands- und Sturmflutvorhersage. Hydrodynamisch-numerische Modelle der Nord- und Ostsee und ein empirisch-statistisches Verfahren fuer die Deutsche Bucht, promet. Jahrg. 29, Nr 1-4, 117-124, June 2003                                                                                                                                                                            |
| Sommer (2003)                         | 3 | Sommer, A., Offshore measurements of wind and waves at Horns Rev & Laeso, Denmark. European Seminar OWEMES 2003, Apr 10-12, 2003, Naples, Campania, Italy.                                                                                                                                                                                                                                                                                                      |
| Toffoli et al (2003)                  | 4 | Toffoli J.M., J.M. Lefevre, J. Montbaliu, H. Savina, E. Bitner-Gregersen, Freak waves: Clues for prediction in ship accidents? Proceedings of the Thirteenth (2003) International Offshore and Polar Engineering Conf. Honolulu, Hawaii, USA, May 25-30,2003, The International Society of Offshore and Polar Engineers                                                                                                                                         |
| Woetmann Nielsen and Sass (2003)      | 3 | Woetmann Nielsen N and B Hansen Sass, A numerical, high-resolution study of the life cycle of the severe storm over Denmark on 3Dec1999, Tellus, 55A, 338-351, 2003.                                                                                                                                                                                                                                                                                            |
| Bitner-Gregersen and Magnusson (2004) | 4 | Bitner-Gregersen EM, AK Magnusson, Extreme events in field data and in a second order wave model, Proc. of the Rogue Waves 2004 workshop, Oct 20-22, 2004, Brest, France                                                                                                                                                                                                                                                                                        |

|                                   |   |                                                                                                                                                                                                                                                                                                                                                                                    |
|-----------------------------------|---|------------------------------------------------------------------------------------------------------------------------------------------------------------------------------------------------------------------------------------------------------------------------------------------------------------------------------------------------------------------------------------|
| Nilsson et al. (2004)             | 3 | Nilsson C, I Stjernquist, L Barring, P Schlyter, AM Jonsson, H Samuelsson, Recorded storm damage in Swedish forests 1901-2000, <i>Forest Ecology and Management</i> 1999, 163-173, 2004                                                                                                                                                                                            |
| Sahin (2004)                      | 4 | Sahin, AD, Progress and recent trends in wind energy, <i>Progress in Energy and Combustion Science</i> , 30, 501-543, 2004.                                                                                                                                                                                                                                                        |
| DEA (2005)                        | 4 | DEA, Offshore Wind Power. Danish Experiences and Solutions. Danish Energy Authority, October, 2005. [pdf properties: datestamp: 24Oct2005]                                                                                                                                                                                                                                         |
| Elsam (2005)                      | 4 | Elsam, Horns Rev - daenisches Windkraftwerk in der Nordsee, <i>Stahlbau</i> , 451, 73, 2005, pdf datestamp: 02Jun2005                                                                                                                                                                                                                                                              |
| Liu et al (2005)                  | 4 | Liu WT, X Xie, H Hu, W Tang, Wind convergence observed by Quikscat, 2005                                                                                                                                                                                                                                                                                                           |
| Mueller-Navarra (2005)            | 3 | Mueller-Navarra, Sylvin, Sturmfluten. Land under an Nord- und Ostsee, in: <i>Entfesselte Elemente-Der Mensch und die Kraefte der Natur</i> , 5, 92-99, Guetersloh. Wissen-Media-Verl., 2005                                                                                                                                                                                        |
| Rosenthal (2005)                  | 4 | Rosenthal, W., Results of the Maxwave project, in Mueller P and D Henderson (ed), 2005, <i>Rogue Waves. Proc. 14th 'Aha Huliko' Hawaii, Winter workshop</i> , Univ. Hawaii, Manoa, Honolulu: School of Ocean Earth Sci Technoll, Spec Publ, 193 pp., <a href="http://www.soest.hawaii.edu/PubServices/AhaHuliko.html">http://www.soest.hawaii.edu/PubServices/AhaHuliko.html</a> . |
| Sterl and Caires (2005)           | 4 | Sterl, Andreas and Sofia Caires, Climatology, variability and extrema of ocean waves: The web-based KNMI/ERA-40 Wave Atlas, <i>International Journal of Climatology</i> , 25, 963-977, 2005.                                                                                                                                                                                       |
| Toffoli et al (2005)              | 4 | Toffoli A, J.M. Lefevre, E. Bitner-Gregersen, J. Monbaliu, Towards the identification of warning criteria: Analysis of a ship accident database, <i>Applied Ocean Research</i> , 27, 281-291, 2005                                                                                                                                                                                 |
| Williams (2005)                   | 4 | Williams, M.O., Wave mapping in UK waters, Prepared by PhysE for the Health and Safety Executive 2005, Research Report 392                                                                                                                                                                                                                                                         |
| Frank and Majewski (2006)         | 2 | Frank, H, and D Majewski, Hindcasts of historic storms with the DWD models GME, LMQ and LMK using ERA-40 reanalysis, <i>ECMWF Newsletter No. 109</i> , autumn 2006, pp.16-21.                                                                                                                                                                                                      |
| Jensen et al (2006)               | 2 | Jensen J, C Mundersbach, SH Mueller-Navarra, I Bork, C Koziar, V Renner, Modellgestuetzte Untersuchungen zu Sturmfluten mit sehr geringen Eintrittswahrscheinlichkeiten an der deutschen Nordseekueste, <i>Die Kueste</i> , 71, 123-167, 2006.                                                                                                                                     |
| Bork et al (2007)                 | 4 | Bork I, S Dick, E Kleine, S Mueller-Navarra, Tsunami - a study regarding the North Sea coast, <i>Berichte des Bundesamtes fuer Seeschiffaahrt und Hydrographie</i> , Nr.41/2007, Hamburg and Rostock 2007                                                                                                                                                                          |
| Mueller-Westermeier (2007)        | 3 | Gerhard Mueller-Westermeier, Beschreibung un klimatologische Bewertung des Orkantiefs "Kyrill", pdf properties: Title: Deutscher Wetterdienst - Nationale Klimauberwachung, Author: Gerhard Mueller-Westermeier, Subjet: Orkan Kyrill, datestamp: 26Jan2007                                                                                                                        |
| Nilsson et al. (2007)             | 1 | Nilsson C, S Goyette, L Barring, Relating forest damage data to the wind field from high-resolution RCM simulations: case study of Anatol striking Sweden in December 1999, <i>Global and Planetary Change</i> , 57, 161-176, 2007.                                                                                                                                                |
| Schroevers et al (2007)           | 3 | Schroevers M, J Dekker, R Groenendaal, H Peters, Inventory wave data for model calibration, <i>Rijksinstituut voor Kust en Zee, Rijkswaterstaat</i> , July, 2007 [pdf timestamp 07Jan2016]                                                                                                                                                                                         |
| Gorbachev et al (2008)            | 4 | Gorbachev A, JM Mattei, V Rebour, E Vial, Report on flooding of Le Blayais power plant on 27 december 1999, internet 2008                                                                                                                                                                                                                                                          |
| Jensen and Mueller-Navarra (2008) | 3 | Jensen J, SH Mueller-Navarra, Storm surges on the German coast, <i>Die Kueste</i> , 74 ICCE (2008), 92-124.                                                                                                                                                                                                                                                                        |
| Krogstad et al (2008)             | 4 | Krogstad, HE., S.F. Barstow, J.P. Mathisen, L. Lonseth, A.K. Magnusson, M.A. Donelan, Extreme waves in the long-term wave measurements at Ekofisk, in <i>Proc. Rogue Waves 2008 Workshop</i> , ed. by M Olagnon and M. Prevosto, 13-15Oct2008, Brest France, 23-33, 2008                                                                                                           |
| Von Storch and Woth (2008)        | 1 | von Storch, Hans and Katja Woth, Storm surges: perspectives and options, <i>Sustain Sci</i> , 3, 33-43, 2008                                                                                                                                                                                                                                                                       |
| Della-Marta et al (2009)          | 3 | Della-Marta PM, H Mathis, C Frei, MA Liniger, J Kleinn, C Appenzeller, The return period of wind storms over Europe, <i>International Journal of Climatology</i> , 29, 437-459, 2009.                                                                                                                                                                                              |
| Fink et al. (2009)                | 3 | Fink AH, T Brucher, V Ermert, A Kruger, JG Pinto, The European storm Kyrill in Jan 2007: synoptic evolution, meteorological impacts and some considerations with respect to climate change, <i>Natural Hazards and Earth System Sciences</i> , 9, 405-423, 2009.                                                                                                                   |
| Goennert and Buss (2009)          | 3 | Goennert, Gabriele & Thomas Buss, Sturmfluten zur Bemessung von Hochwasserschutzanlagen, <i>Berichte des Landesbetriebes Strassen, Bruecken und Gewaesser Nr.2/2009</i> , Freie und Hansestadt Hamburg, Landesbetrieb Strassen, Bruecken und Gewaesser, Hamburg ISSN 1867-7959.                                                                                                    |
| Tatge (2009)                      | 2 | Tatge, Yoern, Looking back, looking forward: Anatol, Lothar and Martin ten years later, 09Dec2009. <a href="https://www.air-worldwide.com/publications/air-currents/looking-back-looking-forward-anatol-lothar-and-martin-ten-years-later/">https://www.air-worldwide.com/publications/air-currents/looking-back-looking-forward-anatol-lothar-and-martin-ten-years-later/</a>     |
| Wagenaar and Eecen (2009)         | 4 | Wagenaar JW, PJ Eecen, Measurements of wind, wave and currents, OWEZ_R_122_Wave_20050701_200812131, ECN-E--09-015, December 2009                                                                                                                                                                                                                                                   |
| Fehrmann and Fackler (2010)       | 2 | Fehrmann, A. and A. Fackler, Offshore wind farms: risk and initial loss experience, Temple Insurance, a member of the Munich Re Group, 2010 [PDF timestamp: 09Mar2010] (last date reference 2001; last incident reference 2003)                                                                                                                                                    |
| Gardiner (2010)                   | 3 | Gardiner, Barry, Appendix 3: Background information on 11 storms selected for detailed analysis, <i>European Forest Institute, Atlantic European Regional Office - EFIAtlantic</i> , 161 pp. [PDF properties: datestamp 23Jul2010]                                                                                                                                                 |
| Herrling et al (2010)             | 3 | Herrling Gerald, Heiko Knaack, Ralf Kaiser, Hanz D. Niemayer, Evaluation of design water levels at the Ems-Dollard estuary considering the effect of a storm surge barrier, 32nd Conference on Coastal Engineering 2010, Shanghai, China, 30Jun-05Jul2020. ed by JM Smith and P Lynett, pp. 3899-3917, [pdf document properties: title=ICCE2020_Ems_final, datestamp=15Sep2010]    |
| Schweirz et al (2010)             | 3 | Schweirz C, P Koellnet-Heck, E Zenklusen Mutter, DN Bresch, P-L Vidale, M Wild, C Schaer, Modelling European winter wind storm losses in current and future climate, <i>Climatic Change</i> , 101, 485-514, 2010.                                                                                                                                                                  |
| Bilgili et al (2011)              | 4 | Bilgili M, A. Yasar, E. Simsek, Offshore wind power development in Europe and its comparison with onshore counterpart, <i>Renewable and Sustainable Energy Reviews</i> , 15, 905-915, 2011                                                                                                                                                                                         |
| Gatey (2011)                      | 3 | Gatey, DA, The analysis of extreme synoptic winds, Ph.D. Thesis, University of Western Ontario, 2011. University of Western Ontario - Electronic Thesis and Dissertation Repository. Paper 268.                                                                                                                                                                                    |
| Rosenthal et al. (2011)           | 3 | Rosenthal W, AL Pleskachevsky, S Lehner, S Bruschi, Observation and modeling of high individual ocean                                                                                                                                                                                                                                                                              |

|                               |   |                                                                                                                                                                                                                                                                                                                                                                                                                    |
|-------------------------------|---|--------------------------------------------------------------------------------------------------------------------------------------------------------------------------------------------------------------------------------------------------------------------------------------------------------------------------------------------------------------------------------------------------------------------|
|                               |   | waves and wave groups caused by a variable wind field, 12th International Workshop on Wave Hindcasting and Forecasting, Kohala Coast, Hawai'i, HI, 2011.                                                                                                                                                                                                                                                           |
| SMHI (20111013)               | 1 | SMHI_20111013, Hosten 1999 - Arhundradets storm? 13Oct2011 ( <a href="https://www.smhi.se/kunskapsbanken/meteorologi/hosten-1999-arhundradets-storm-1.5762">https://www.smhi.se/kunskapsbanken/meteorologi/hosten-1999-arhundradets-storm-1.5762</a> )                                                                                                                                                             |
| Environment Agency (2012)     | 3 | Environment Agency, Thames Barrier Project Pack 2012, time stamp Nov. 24, 2011                                                                                                                                                                                                                                                                                                                                     |
| Gardiner et al (2012)         | 3 | Gardiner B, K Blennow, J-M Carnus, P Fleischer, F Ingemarson, G Landmann, M Lindner, M Marzano, B Nicoll, C Orazio, J-L Peyron, M-P Reviron, M-J Schelhaas, A Schuck, M Spielmann, T Usbeck, Destructive storm in European Forests: Past and Forthcoming Impacts, European Forest Institute, Atlantic European Regional Office - EFIAtlantic [pdf document properties: author=Barry Gardiner, datestamp=09Mar2012] |
| Sieber (2012)                 | 3 | Sieber, Jeanette, Impacts of extreme hydro-meteorological events on electricity generation and possible adaptation measures. A GIS-based approach for corporate risk management and enhanced climate mitigation concepts in Germany. Ph.D. thesis, Julius-Maximilians-Universitaet Wuerzburg - Institut fuer Geographie, Karlsruhe, November 2012                                                                  |
| AON Benfield (2013)           | 3 | AON Benfield, Historie von 1703 bis 2012: Winterstuerme in Europa, Stand: Januar 2013                                                                                                                                                                                                                                                                                                                              |
| Danhostel-Ribe (2013)         | 3 | Danhostel-Ribe, Sturmfluten, <a href="https://web.archive.org/web/20131215125955/http://www.danhostel-ribe.dk/de/sturmfluten">https://web.archive.org/web/20131215125955/http://www.danhostel-ribe.dk/de/sturmfluten</a> , accessed 25Apr2021                                                                                                                                                                      |
| Foster (2013)                 | 4 | Foster R, Signature of large aspect ratio roll vorticies in synthetic aperture radar images of tropical cyclones, <i>Oceanography</i> , 26, 58-67, 2013.                                                                                                                                                                                                                                                           |
| Fruergaard et al (2013)       | 4 | Fruergaard M, TJ Andersen, PN Johannessen, LH Nielsen, M Pejrup, Major coastal impact induced by a 1000-year storm event, <i>Nature, Scientific Reports</i> , 3:1051, DOI: 101038/srep01051, 2013.                                                                                                                                                                                                                 |
| Haeseler and Lefebvre (2013)  | 3 | Haeseler S, C Lefebvre, Heavy storm Christian on 28 October 2013, DWD, 13Nov2013                                                                                                                                                                                                                                                                                                                                   |
| Humbling (2013)               | 2 | Humbling David, Weatherwatch: Our severe gales are not hurricanes, but they can be as deadly, <i>The Guardian</i> , 13Dec2013                                                                                                                                                                                                                                                                                      |
| Joyner (2013)                 | 3 | Joyner, T.A., Optimizing peak gust and maximum sustained wind speed estimates from mid-latitude wave cyclones, Louisiana State University Doctoral Dissertations, 421, 2013                                                                                                                                                                                                                                        |
| Pelt (2013)                   | 3 | Pelt, S., Kraftige storme med oprindelse i Nordatlanten, <i>Vejret</i> , 137, 44-47, 2013                                                                                                                                                                                                                                                                                                                          |
| Ge et al (2014)               | 2 | Ge J, D Much, J Kappenberg, O Nino, P Ding, Z Chen, Simulating storm flooding maps over Hafencity under present and sea level rise scenarios, <i>Journal of Flood Risk Management</i> , 7, 319-331, 2014.                                                                                                                                                                                                          |
| Kristandt et al (2014)        | 3 | Kristandt, J, B Brecht, H Frank, H Knaack, Optimization of empirical storm surge forecast – modelling of high resolution wind fields, <i>Die Kuste</i> , 18, 301-308, 2014                                                                                                                                                                                                                                         |
| RMS (2014)                    | 3 | RMS, 2013-2014 Winter Storms in Europe. An Insurance and Catastrophe Modeling Perspective. RMS White Paper. [PDF TIMESTAMP 11Mar2014]                                                                                                                                                                                                                                                                              |
| Roberts et al (2014)          | 3 | Roberts JF, AJ Champion, LC Dawkins, KI Hodes, LC Shaffrey, DB Stephenson, MA Stringer, HE Thornton, DB Youngman, The XWS open access catalogue of extreme European windstorms from 1979 to 2012, <i>Nat. Hazards Earth Syst. Sci</i> , 14, 2487-2501, 2014                                                                                                                                                        |
| Danish Energy Agency (2015)   | 3 | Danish Energy Agency, Security of Electricity Supply in Denmark, 1st edition 2015, translated 2016, Danish Energy Agency, Amaliegade 44, 1256 Copenhagen K, ISBN 978-87-93180-15-4                                                                                                                                                                                                                                 |
| Feser et al (2015)            | 4 | Feser F, M Barcikowska, O Krueger, F Schenk, R Weiss, L Xia, Review Article: Storminess over the North Atlantic and northwestern Europe - a review, <i>QJR Meteorol. Soc</i> , 141, 350-382, 2015.                                                                                                                                                                                                                 |
| Larsen et al (2015)           | 4 | Larsen XG, C Kalogeris, G Galanis, G Kallos, A statistical methodology for the estimation of extreme wave conditions for offshore renewable applications, <i>Renewable Energy</i> , 80, 205-218, 2015.                                                                                                                                                                                                             |
| Thejournal.ie (20151214)      | 3 | thejournal.ie, The deadliest storms to ever hit Europe, 14Dec2015 0610AM, <a href="https://www.thejournal.ie/europe-storms-2497164-Dec2015/">https://www.thejournal.ie/europe-storms-2497164-Dec2015/</a> , accessed 10Dec2020                                                                                                                                                                                     |
| Larsen et al (2017)           | 3 | Larsen XG, J Du, R Bolanos, S Larsen, On the impact of wind on the development of wave field during storm Britta, <i>Ocean Dynamics</i> , 67, 1407-1427, 2017.                                                                                                                                                                                                                                                     |
| Ravndal and Abrahamsen (2017) | 4 | Ravndal, Oda Roaldsdotter and Trine Abrahamsen, The Norwegian tide gauge network: National report of Norway, Kartverket, June 2017.                                                                                                                                                                                                                                                                                |
| Caithness Windfarm (20180730) | 3 | Caithness Windfarm, craigrd, Detailed accidents to 19 June 2018. Document time stamp 30/07/2018, 177pp Wind turbine accident compilation (start 30Nov1980) [Storm Anatol 1999 reports]                                                                                                                                                                                                                             |
| Capellen (2018)               | 3 | Cappelen, J., Storm og ekstrem vind i Danmark - opgørelser og analyser til og med 2017, DMI rapport 18-07, Copenhagen 2018                                                                                                                                                                                                                                                                                         |
| Cappelen et al (2018a)        | 1 | Cappelen J, S Olufsen, MH Ribergaard, JW Nielsen, T Schmith, N Hansen, Det traekker op til orkan, updated 25Jun2018a, <a href="https://www.dmi.dk/vejr-og-atmosfare/temaforside-decemberorkanen-1999/det-traekker-op-til-orkan/">https://www.dmi.dk/vejr-og-atmosfare/temaforside-decemberorkanen-1999/det-traekker-op-til-orkan/</a>                                                                              |
| Cappelen et al (2018b)        | 1 | Cappelen J, S Olufsen, MH Ribergaard, JW Nielsen, T Schmith, N Hansen, Stormfloden under decemberorkanen, updated 25Jun2018b, <a href="https://www.dmi.dk/vejr-og-atmosfare/temaforside-decemberorkanen-1999/stormfloden-under-decemberorkanen/">https://www.dmi.dk/vejr-og-atmosfare/temaforside-decemberorkanen-1999/stormfloden-under-decemberorkanen/</a>                                                      |
| Cappelen et al (2018c)        | 1 | Cappelen J, S Olufsen, MH ribergaard, JW Nielsen, T Schmith, N Hansen, Var klimaændringer skyld i decemberorkan? updated 25Jun2018c, <a href="https://www.dmi.dk/vejr-og-atmosfare/temaforside-decemberorkanen-1999/var-klimaændringer-skyld-i-decemberorkanen/">https://www.dmi.dk/vejr-og-atmosfare/temaforside-decemberorkanen-1999/var-klimaændringer-skyld-i-decemberorkanen/</a>                             |
| Cappelen et al (2018d)        | 1 | Cappelen J, S Olufsen, MH Ribergaard, JW Nielsen, T Schmith, H Hansen, Dagen derpaa, updated 25Jun2018d, <a href="https://www.dmi.dk/vejr-og-atmosfare/temaforside-decemberorkanen-1999/dagen-derpaa/">https://www.dmi.dk/vejr-og-atmosfare/temaforside-decemberorkanen-1999/dagen-derpaa/</a>                                                                                                                     |
| Cappelen et al (2018e)        | 1 | Cappelen J, S Olufsen, MH Ribergaard, JW Nielsen, T Schmith, N Hansen, Orkan passerer, updated 25Jun2018e, <a href="https://www.dmi.dk/vejr-og-atmosfare/temaforside-decemberorkanen-1999/orkanen-passerer/">https://www.dmi.dk/vejr-og-atmosfare/temaforside-decemberorkanen-1999/orkanen-passerer/</a>                                                                                                           |
| Cappelen et al (2018f)        | 1 | Cappelen J, S Olufsen, MH Ribergaard, JW Nielsen, T Schmith, N Hansen, Bringer fremtiden flerer decemberorkaner? 25Jun2018f, <a href="https://www.dmi.dk/vejr-og-atmosfare/temaforside-decemberorkanen-1999/bringer-fremtiden-flere-decemberorkaner/">https://www.dmi.dk/vejr-og-atmosfare/temaforside-decemberorkanen-1999/bringer-fremtiden-flere-decemberorkaner/</a>                                           |
| Cappelen et al (2018g)        | 1 | Cappelen J, S Olufsen, MH Ribergaard, JW Nielsen, T Schmith, N Hansen, Bringer fremtiden flerer decemberorkaner? 25Jun2018g, <a href="https://www.dmi.dk/vejr-og-atmosfare/temaforside-decemberorkanen-1999/bringer-fremtiden-flere-decemberorkaner/">https://www.dmi.dk/vejr-og-atmosfare/temaforside-decemberorkanen-1999/bringer-fremtiden-flere-decemberorkaner/</a>                                           |

|                             |   |                                                                                                                                                                                                                                                                                                                                                                  |
|-----------------------------|---|------------------------------------------------------------------------------------------------------------------------------------------------------------------------------------------------------------------------------------------------------------------------------------------------------------------------------------------------------------------|
| Decker (2018)               | 3 | Decker, Lauge, Windthrow risk assessment of Douglas-fir stands in Denmark. A comparison study of Douglas-fir ( <i>Pseudotsuga menziesii</i> ) and Norway spruce ( <i>Picea abies</i> ), M.Sc. thesis, University of Copenhagen, submitted 6Aug2018 [pdf properties: title=Notatbog; author=Lauge Decker, Subject=SKOG303 - Silviculture and forest growth yield] |
| Ditlevsen et al. (2018)     | 3 | Ditlevsen C, MM Ramos, C Sorensen, UR Ciocan, T Pionkowitz, <i>Hojvandsstatistikker 2017</i> , Miljo- og Foedevareministeriet, Kystdirektoratet Lemvig, Februar, 2018                                                                                                                                                                                            |
| Environment Agency (2018)   | 3 | Environment Agency, Thames Barrier Project Pack, January, 2018                                                                                                                                                                                                                                                                                                   |
| Air Worldwide (20191219)    | 3 | Air Worldwide, Three severe storms together were a wake-up call, 19Dec2019.                                                                                                                                                                                                                                                                                      |
| Astleitner (2019)           | 1 | Astleitner, Thomas, 3. December 1999: Orkantief Anatol fegt ueber de Nordsee, <a href="https://uwr.de/de/a/3-dezember-1999-orkan-tief-anatol-trifft-deutschland">https://uwr.de/de/a/3-dezember-1999-orkan-tief-anatol-trifft-deutschland</a> , published 3Dec2019, accessed 20Sep2020                                                                           |
| Buchana and McSharry (2019) | 3 | Buchana P, PR McSharry, Windstorm risk assessment for offshore wind farms in the North Sea, <i>Wind Energy</i> , 22, 1219-1229, 2019                                                                                                                                                                                                                             |
| Cappelen (2019)             | 1 | Capellen, John, Orkaner paa vore breddegrader, updated 8Jan2019 <a href="https://www.dmi.dk/vejr-og-atmosfare/temaforside-vind/orkaner-paa-vore-breddegrader/">https://www.dmi.dk/vejr-og-atmosfare/temaforside-vind/orkaner-paa-vore-breddegrader/</a> , (webpage downloaded 12Oct2020)                                                                         |
| World Energy Council (2019) | 3 | World Energy Council, Case Study Series, Extreme Weather, Windstorms France December 1999, <a href="https://www.worldenergy.org/assets/downloads/Windstorms_France_-_Extreme_weather_conditions_SEP_2019.pdf">https://www.worldenergy.org/assets/downloads/Windstorms_France_-_Extreme_weather_conditions_SEP_2019.pdf</a> , pdf date stamp: 11Oct2019           |
| Halsne et al (2020)         | 4 | Halsne M, N Oma, G Ersdal, A Kvitrud, RL Leonhardsen, M Langoy, T Andersen, LG BJORHEIM, In service experiences with ship-shaped floating production units, Proceedings of the ASMI 2020 39th International Conference on Ocean, Offshore and Arctic Engineering, OMAE 2020, June 28-July 3, 2020, Fort Lauderdale, FL, USA, OMAE2020-19287                      |
| Surgewatch (20201013)       | 4 | Surgewatch, Storm event 28th November 1999, <a href="https://www.surgewatch.org/events/1999_11_28/">https://www.surgewatch.org/events/1999_11_28/</a> , accessed 13Oct2020                                                                                                                                                                                       |
| XWS (20200906)              | 3 | XWS, Extreme Wind Storms Catalogue, <a href="http://www.europeanwindstorms.org/cgi-bin/storms/storms.cgi">http://www.europeanwindstorms.org/cgi-bin/storms/storms.cgi</a> , accessed 06Sep2020                                                                                                                                                                   |
| Wikipedia (20210418)        | 1 | Wikipedia, Orkan Anatol, <a href="https://de.wikipedia.org/wiki/Orkan_Anatol">https://de.wikipedia.org/wiki/Orkan_Anatol</a> , accessed 18Apr2021                                                                                                                                                                                                                |

Notes:

<sup>1</sup> Type: 1=storm is main focus (or used as key example in general discussion); 2=1-4 case studies including the storm; 3=the storm is one of many case studies or mentioned only; 4=storm not mentioned; reference is included for background information

Table SL2. List of sources that could not be obtained (alphabetically)

| Source                  | Full Reference and Notes                                                                                                                                                                                         |
|-------------------------|------------------------------------------------------------------------------------------------------------------------------------------------------------------------------------------------------------------|
| BP (2007)               | BP (2007), Valhall field. Oceanic and meteorological design data summary, version 4, BP                                                                                                                          |
| Goennert (2000)         | Goennert, G., Simulation der Sturmflut von .12.1999 und Veraenderung der Zugbahn des Sturmtiefs Anatol. Ergebnis einer Arbeitsgruppe in Zusammenarbeit mit dem DWD, BAW-AK, BSH und Strom- und Hafenaufbau, 2000 |
| Hjorteland et al (1999) | Hjorteland K, MJ Mes, AK Magnusson, Ekofisk Observed Weather Compared with Weather Predictions, Offshore Technology Conference, 3-6May, Houston, Texas, 1999, OTC-10768-MS                                       |
| Lonseth (2006)          | Lonseth, L, Ekofisk Reference Data Set 1980-2005, Fugro Oceanor Report No C55060/4026/R2, 2006.                                                                                                                  |
| Magnusson (1993)        | Magnusson AK, Ekofisk Extreme Wave Analysis, Preliminary Report, Tech Rep Nr 103, DNMI, Feb 1993                                                                                                                 |
| Munich Re (1973)        | Munich Re, Sturmschaeden in Europa, 1973.                                                                                                                                                                        |
| Standing (1997)         | RG Standing, Green sea damage on FPSOs and FSUs, HSE Report OTH 486, London, 1997                                                                                                                                |

Table SL3. List of normal photos of event (arranged by year and then alphabetically)

| Source                   | Full Reference and Notes                                                                                                                                                                                                                                                                                                                                                                                                                                                                    |
|--------------------------|---------------------------------------------------------------------------------------------------------------------------------------------------------------------------------------------------------------------------------------------------------------------------------------------------------------------------------------------------------------------------------------------------------------------------------------------------------------------------------------------|
| Munich Re (2002)         | Munich Re, Winter Storms in Europe (II), Analysis of 1999 losses and loss potentials, Muenchener Rueck, Munich Re Group, 76pp, 2002<br>-photos of storm damage in Europe in December 1999 but Storm Anatol and locations not explicitly identified                                                                                                                                                                                                                                          |
| Tatge (2009)             | Tatge, Yoern, Looking back, looking forward: Anatol, Lothar and Martin ten years later, 09Dec2009. <a href="https://www.air-worldwide.com/publications/air-currents/looking-back-looking-forward-anatol-lothar-and-martin-ten-years-later/-FIG1">https://www.air-worldwide.com/publications/air-currents/looking-back-looking-forward-anatol-lothar-and-martin-ten-years-later/-FIG1</a> . [PHOTOS] Damage from Storm Anatol in Denmark; roof, collapsed wall, collapsed barn (Source: AIR) |
| Cappelen et al (2018d)   | Cappelen J, S Olufsen, MH Ribergaard, JW Nielsen, T Schmith, H Hansen, Dagen derpaa, updated 25Jun2018d, <a href="https://www.dmi.dk/vejr-og-atmosfare/temaforside-decemberorkanen-1999/dagen-derpaa/">https://www.dmi.dk/vejr-og-atmosfare/temaforside-decemberorkanen-1999/dagen-derpaa/</a><br>-FIG. [PHOTO] Storm falls in Danish mixed forest after December hurricane 1999                                                                                                            |
| Air Worldwide (20191219) | Air Worldwide, Three severe storms together were a wake-up call, 19Dec2019.<br>-FIG1. [PHOTO] damage from Anatol in Denmark; roof damage, collapsed wall, destroyed barn                                                                                                                                                                                                                                                                                                                    |

Table SL4. Ranking of storm among events; assessing importance of storm (arranged by year and then alphabetically)

| Source                          | Full Reference and Notes                                                                                                                                                                                                                     |
|---------------------------------|----------------------------------------------------------------------------------------------------------------------------------------------------------------------------------------------------------------------------------------------|
| Brugge (1999)                   | Brugge, Roger, Weather Diary, Dec 1999 <a href="http://www.met.reading.ac.uk/~brugge/diary1999.html#1299">www.met.reading.ac.uk/~brugge/diary1999.html#1299</a><br>-75mph gust at Leeds was December record                                  |
| DMI (19991209)                  | DMI, Rapport. Orkanen over Danmark den 3.-4. december 1999, Danmarks Meteorologiske Institut, Lyngbyvej 100, DK-2100 Kobenhavn 0, 9Dec1999.<br>-Hurricane Anatol assessed as 100-year event                                                  |
| Kristeligt Dagblad (1999)       | Kristeligt Dagblad, Orkan haergede landet over. Paa vestkysten naede vindstyrken op pa 47 sekundmeter, 4Dec1999 00:00<br>-DMI watch chief Niels Thyge Rasmussen says Anatol was some of the worst storm weather Denmark has ever experienced |
| Lloyds Casualty Week (19991217) | Lloyds Casualty Week, vol318, No12, 17Dec1999<br>-storm is identified as the storm of the century for Denmark                                                                                                                                |
| Met Eireann (199912)            | Met Eireann, Monthly Weather Bulletin, no. 164, Dec, 1999<br>-Anatol not ranked very dangerous for Ireland                                                                                                                                   |

|                                              |                                                                                                                                                                                                                                                                                                                                                                                                                                                                                                                                                                                                                                                                                                                                                                                                                                |
|----------------------------------------------|--------------------------------------------------------------------------------------------------------------------------------------------------------------------------------------------------------------------------------------------------------------------------------------------------------------------------------------------------------------------------------------------------------------------------------------------------------------------------------------------------------------------------------------------------------------------------------------------------------------------------------------------------------------------------------------------------------------------------------------------------------------------------------------------------------------------------------|
|                                              | <p>-some locations measured highest 10min wind speed and gust of month in pre-dawn 03Dec1999</p> <p>-winds described as very strong and gusty</p> <p>-wave conditions around Ireland low on 3Dec (5m) but up to 9.5m on 8Dec (highest of month)</p>                                                                                                                                                                                                                                                                                                                                                                                                                                                                                                                                                                            |
| RWS (1999)                                   | <p>RWS, Verslag van de Stormvloed van 3 en 4 december 1999 (SR79), Ministerie van Verkeer en Waterstaat, Directoraat-Generaal Rijkswaterstaat, Rijksinstituut voor Kust en Zee, Stormvloedwaarschuwingsdienst, Postbus 20907, 2500EX 's-Gravenhage, 's-Gravenhage, december 1999.</p> <p>-storm surge 3-4Dec1999 not exceptional for Netherlands</p> <p>-across entire Dutch coast return period ranking was 4X/year to 1 per 3year.</p> <p>-hurricane-strength storm caused problems Denmark &amp; N Germany</p> <p>-German/Denmark: one of the 4 most powerful storms of 20th century</p> <p>-Denmark: only 3 comparable storms with wspd&gt;125km/h: kerststorm 26Nov1902, surge 18Oct1967, surge 24Nov1981</p>                                                                                                             |
| Vedin and Alexandersson (1999)               | <p>Vedin, Haldo and Hans Alexandersson, Aarhunderadets storm? Vaader och Vatten, p.18, Dec, 1999</p> <p>-how do these storms compare with previous storms?</p> <p>-last time hurricane strength winds at coast 26Feb1990 with 38m/s at Kullen</p> <p>-last time similar or higher winds Masekar and Orskar during 10Jan1991 and 7Dec1989</p> <p>-last time comparable winds Hano 20Jan1986 and 24Nov1981 with 34m/s</p> <p>-last time comparable wind Falsterbo 17Oct1967 with 38m/s and 6 deaths</p>                                                                                                                                                                                                                                                                                                                          |
| Beredskapsstyrelsen Udviklingsenheden (2000) | <p>Beredskapsstyrelsen Udviklingsenheden, Den Samlede redningsbreds-kabssektors opgavelosning i forbindelse med orkanen d. 3.-4. december og stormen d. 17 december 1999 - En Tvaer-gaende evaluering og erfaringsopsamling. Februar 2000, Beredskapsstyrelsen, Beredskabsudviklingsenheden, Datavej 16, 3460 Birkerød, Telefon: 4590 6000, Telefax: 4590 6060, E-mail: bue@brs.dk, Internet: www.brs.dk</p> <p>-Denmark hit by most powerful hurricane of 20C</p>                                                                                                                                                                                                                                                                                                                                                             |
| Bresch et al (2000)                          | <p>Bresch DN, M Bisping, G Lemcke, Storm over Europe. An underestimated risk, Swiss Re (Swiss Reinsurance Company), 27pp, 2000.</p> <p>-Anatol rank 6/10 European winter storm insurance losses in list starting 1976; return period &lt;5y</p>                                                                                                                                                                                                                                                                                                                                                                                                                                                                                                                                                                                |
| Kristensen et al (2000)                      | <p>Kristensen L, O Rathmann, SO Hansen, Extreme wind in Denmark, Journal of Wind Engineering and Industrial Aerodynamics, 87, 147-166, 2000.</p> <p>-Anatol was worst storm on record for Denmark</p>                                                                                                                                                                                                                                                                                                                                                                                                                                                                                                                                                                                                                          |
| Mann and Hansen (2000)                       | <p>Mann AJ, SO Hansen, En storm gor ingen norm, Vejret, no1. 22.Argang, 82, pp.28-34, Februar 2000.</p> <p>-only defining storm mentioned in the context of the revisions of Danish construction standards</p>                                                                                                                                                                                                                                                                                                                                                                                                                                                                                                                                                                                                                 |
| Neckelmann and Petersen (2000)               | <p>Neckelmann, S. and J. Petersen, Evaluation of the stand-alone wind and wave measurement systems for Horns Rev 150MW offshore wind farm in Denmark, OWEMES 2000, ATENA, Rome, Sicily, pp.17-27, 2000</p> <p>-"With wind speeds recorded of this magnitude the hurricane was the fiercest in Denmark for more than a 100 years."</p>                                                                                                                                                                                                                                                                                                                                                                                                                                                                                          |
| Nielsen and Nielsen (2000)                   | <p>Nielsen, Jacob Woge and Nielsen, Mads Hvid, Stormfloden foraarsaget af orkanen den 3. december 1999, Vejret, 82, 8-14, Februar 2000</p> <p>-rank 4 storm surge water level Esbjerg; rank 1 event in 1981</p> <p>-all-time low water level record in western Baltic; 2m below normal; many gauges left dry</p>                                                                                                                                                                                                                                                                                                                                                                                                                                                                                                               |
| Rosenorn (2000)                              | <p>Rosenorn, Af Stig, De kraftigste storme i det tyvende aarhundrede in Denmark, Vejret, 82, 15-18, Februar 2000</p> <p>-described as century storm</p> <p>-highest ever recorded 10min wind speed and gust in Videhavs areas</p>                                                                                                                                                                                                                                                                                                                                                                                                                                                                                                                                                                                              |
| UN/ECE (2000)                                | <p>UN/ECE Timber Committee, Chapter 3. Effects of the December 1999 storms on European timber markets, ECE/FAO Forest Products Annual Market Review, 1999-2000, 15pp, 2000, Timber Bulletin, Vol LIII, ECE/TIM/BULL/53/3 [pdf document properties: title=3stormdamageFIN.PDF; author=najera; datestamp=15/08/2000] <a href="https://www.unece.org/fileadmin/DAM/timber/docs/rev-00/rev00.htm">https://www.unece.org/fileadmin/DAM/timber/docs/rev-00/rev00.htm</a></p> <p>- FIG3.1.1. Windstorm damage in European forests, 1950-1999</p> <p>NOTE: DEC1999 rank1 event; 1990 storm sequence rank 2 (source: Mr. Mart-Jan Schelhaas, Altera, Netherlands, 2000)</p> <p>-windthrow volumes largest on record; markets expected to be skewed for 2-3 years</p> <p>-Denmark: Anatol wind throw 159.1 percent of annual removal</p> |
| Voldberg (2000)                              | <p>Voldberg Henrik, Vredens julemaaned, Vejret, 82, no.1, 1-7, Feb, 2000.</p> <p>-storm identified as Danmark-Arhundredts orkan</p>                                                                                                                                                                                                                                                                                                                                                                                                                                                                                                                                                                                                                                                                                            |
| Ulblich et al (2001)                         | <p>Ulblich U, AH Fink, M Klawa, JG Pinto, Three extreme storms over Europe in December 1999, Weather 56, 70-80, 2001</p> <p>-storm severity comparable to worst since 1980's: storm 23Nov1981, storm 15-16Oct1987, storm late Feb-1Mar1990, storm Lothar 26Dec1999, storm Martin 27Dec1999</p>                                                                                                                                                                                                                                                                                                                                                                                                                                                                                                                                 |
| DWD (20020528)                               | <p>DWD, Orkantief 'Anatol' von 3./4. Dezember 1999 (5pp), <a href="https://www.dwd.de/DE/leistungen/besondereereignisse/stuerme/19991204_orkantief_anatol.pdf">https://www.dwd.de/DE/leistungen/besondereereignisse/stuerme/19991204_orkantief_anatol.pdf</a> [pdf document properties: datestamp: 28May2002]</p> <p>-Denmark: strongest hurricane of the 20th century</p> <p>-Germany: strongest hurricane of last decades</p> <p>-wind gust records in Denmark and extreme northern German stations</p> <p>-rank 4 storm surge Hamburg</p>                                                                                                                                                                                                                                                                                   |
| Munich Re (2002)                             | <p>Munich Re, Winter Storms in Europe (II), Analysis of 1999 losses and loss potentials, Muenchener Rueck, Munich Re Group, 76pp, 2002</p> <p>-Anatol strongest gale to hit Denmark in 20C</p> <p>-Anatol Sylt wind speed records at 184km/h; exceeded previous record from 1976 by 10%</p> <p>-Anatol wind speed record at Romo with the185km/s</p> <p>-Anatol Hamburg surge water level rank 4 of recent decades</p> <p>-Anatol insured losses many times higher than any other storm for 1990+1999</p> <p>-for all Europe, Anatol after Lothar and Martin for insured losses; high losses Germany and France</p> <p>-TAB_p13: Comparison of insured losses from windstorm series 1990 &amp; 1999: Daria, Herta, Vivian, Wiebke, Anatol, Lothar, Martin</p>                                                                  |
| Sommer (2002)                                | <p>Sommer A, Wind Resources at Horns Rev, Eltra PSO-2000 Proj nr. EG-05 3248, Tech-wise, 2002.</p>                                                                                                                                                                                                                                                                                                                                                                                                                                                                                                                                                                                                                                                                                                                             |



|                                  |                                                                                                                                                                                                                                                                                                                                                                                                                                                                                                                                  |
|----------------------------------|----------------------------------------------------------------------------------------------------------------------------------------------------------------------------------------------------------------------------------------------------------------------------------------------------------------------------------------------------------------------------------------------------------------------------------------------------------------------------------------------------------------------------------|
|                                  | -Anatol was century storm in Denmark                                                                                                                                                                                                                                                                                                                                                                                                                                                                                             |
| Mueller-Navarra et al (2003)     | Mueller-Navarra SH, W Lang, S Dick, KC Soetje, Ueber de Verfahren der Wasserstands- und Sturmflutvorhersage. Hydrodynamisch-numerische Modelle der Nord- und Ostsee und ein empirisch-statistisches Verfahren fuer die Deutsche Bucht, promet. Jahrg. 29, Nr 1-4, 117-124, June 2003<br>-strongest hurricane of the 20th century for Denmark                                                                                                                                                                                     |
| Woetmann Nielsen and Sass (2003) | Woetmann Nielsen N and B Hansen Sass, A numerical, high-resolution study of the life cycle of the severe storm over Denmark on 3Dec1999, Tellus, 55A, 338-351, 2003.<br>-storm damage was considered >100y event<br>-Dec1999 Europe unusual weather with 3 very severe cyclones 3,26,27 Dec                                                                                                                                                                                                                                      |
| Nilsson et al (2004)             | Nilsson C, I Stjernquist, L Barring, P Schlyter, AM Jonsson, H Samuelsson, Recorded storm damage in Swedish forests 1901-2000, Forest Ecology and Management 1999, 163-173, 2004<br>-Anatol 1999 was a rank 5 storm for forest destruction over 100 year period                                                                                                                                                                                                                                                                  |
| Mueller-Navarra (2005)           | Mueller-Navarra, Sylvin, Sturmfluten. Land under an Nord- und Ostsee, in: Entfesselte Elemente-Der Mensch und die Kraefte der Natur, 5, 92-99, Guetersloh. Wissen-Media-Verl., 2005<br>-rank 2 water levels at Hamburg and Husum in storm list 16-17Feb1962, Capella, Daria, Anatol<br>-most German Bight stations otherwise showed rank 4                                                                                                                                                                                       |
| Frank and Majewski (2006)        | Frank, H, and D Majewski, Hindcasts of historic storms with the DWD models GME, LMQ and LMK using ERA-40 reanalysis, ECMWF Newsletter No. 109, autumn 2006, pp.16-21.<br>-for measured 10m winds at Norderney, Anatol rank 6 of 22 storms 1962-2002<br>-strongest storm observed in Denmark                                                                                                                                                                                                                                      |
| Jensen et al (2006)              | Jensen J, C Mudersbach, SH Mueller-Navarra, I Bork, C Koziar, V Renner, Modellgestuetzte Untersuchungen zu Sturmfluten mit sehr geringen Eintrittswahrscheinlichkeiten an der deutschen Nordseekueste, Die Kueste, 71, 123-167, 2006.<br>-Anatol rank 2 event at Husum (1: 1976) and Borkum (1:1962)<br>-Anatol rank 3 event at Wilhelmshaven, Bremerhaven, Cuxhaven, Busum, List                                                                                                                                                |
| Mueller-Westermeier (2007)       | Gerhard Mueller-Westermeier, Beschreibung un klimatologische Bewertung des Orkantiefs "Kyrill", pdf properties: Title: Deutscher Wetterdienst - Nationale Klimauberwachung, Author: Gerhard Mueller-Westermeier, Subjet: Orkan Kyrill, datestamp: 26Jan2007<br>-Anatol rank 7/25 for wind gust in period 1990-2007 with 51.00 m/s measured on List/Sylt                                                                                                                                                                          |
| Nilsson et al. (2007)            | Nilsson C, S Goyette, L Barring, Relating forest damage data to the wind field from high-resolution RCM simulations: case study of Anatol striking Sweden in December 1999, Global and Planetary Change, 57, 161-176, 2007.<br>-several stations in Denmark registered highest ever wind speeds<br>-Sweden Falsterbo station registered most violent storm since 1967<br>-Storm Gudrun Jan 2005 was worse storm for tree damage                                                                                                  |
| Fink et al (2009)                | Fink AH, T Brucher, V Ermert, A Kruger, JG Pinto, The European storm Kyrill in Jan 2007: synoptic evolution, meteorological impacts and some considerations with respect to climate change, Natural Hazards and Earth System Sciences, 9, 405-423, 2009.<br>-Anatol rank 6/10 storms since 1990 in damage parameter<br>-Anatol rank 3/10 storms since 1990 in minimum central pressure (Daria, Wiebke lower)                                                                                                                     |
| Goennert and Buss (2009)         | Goennert, Gabriele & Thomas Buss, Sturmfluten zur Bemessung von Hochwasserschutzanlagen, Berichte des Landesbetriebes Strassen, Bruecken und Gewaesser Nr.2/2009, Freie und Hansestadt Hamburg, Landesbetrieb Strassen, Bruecken und Gewaesser, Hamburg ISSN 1867-7959.<br>-Anatol rank 4 storm in time series 1900-2008:<br>03-04/01/1976 H=1011 S=423<br>16-17/02/1962 H=995 S=387<br>20-22/01/1976 H=970 S=289                                                                                                                |
| Tatge (2009)                     | Tatge, Yoern, Looking back, looking forward: Anatol, Lothar and Martin ten years later, 09Dec2009. <a href="https://www.air-worldwide.com/publications/air-currents/looking-back-looking-forward-anatol-lothar-and-martin-ten-years-later/">https://www.air-worldwide.com/publications/air-currents/looking-back-looking-forward-anatol-lothar-and-martin-ten-years-later/</a><br>-Anatol: strongest winds in Denmark for acentury                                                                                               |
| Fehrmann and Fackler (2010)      | Fehrmann, A. and A. Fackler, Offshore wind farms: risk and initial loss experience, Temple Insurance, a member of the Munich Re Group, 2010 [PDF timestamp: 09Mar2010] (last date reference 2001; last incident reference 2003)<br>-Anatol 1999 was one of three defining storms important for defining insurance loss; others were Gujarat 1998 cyclone and unidentified storm on Spanish Atlantic island (Canary Islands?, Storm Delta 2005?)                                                                                  |
| Gardiner (2010)                  | Gardiner, Barry, Appendix 3: Background information on 11 storms selected for detailed analysis, European Forest Institute, Atlantic European Regional Office - EFlAtlantic, 161 pp. [PDF properties: datestamp 23Jul2010]<br>-Storm Gudrun Jan 2005 had more damage in northern part of Denmark compared with Storm Anatol.<br>-Storm Anatol Dec11999 had more damage in southern part of country                                                                                                                               |
| Herrling et al (2010)            | Herrling Gerald, Heiko Knaack, Ralf Kaiser, Hanz D. Niemayer, Evaluation of design water levels at the Ems-Dollard estuary considering the effect of a storm surge barrier, 32nd Conference on Coastal Engineering 2010, Shanghai, China, 30Jun-05Jul2020. ed by JM Smith and P Lynett, pp. 3899-3917, [pdf document properties: title=ICCE2020_Ems_final, datestamp=15Sep2010<br>-water levels during Anatol were lower than Britta, Tilo or 1906 surge                                                                         |
| Schwierz et al (2010)            | Schwierz C, P Koellnet-Heck, E Zenklusen Mutter, DN Bresch, P-L Vidale, M Wild, C Schaer, Modelling European winter wind storm losses in current and future climate, Climatic Change, 101, 485-514, 2010.<br>-for insurance losses in Anatol-Lothar-Martin, Anatol was rank 3                                                                                                                                                                                                                                                    |
| Rosenthal et al (2011)           | Rosenthal W, AL Pleskachevsky, S Lehner, S Brusch, Observation and modeling of high individual ocean waves and wave groups caused by a variable wind field, 12th International Workshop on Wave Hindcasting and Forecasting, Kohala Coast, Hawai'i, HI, 2011.<br>-Anatol 3Dec1999 described as a heavy, fast-developing storm like Britta 2006<br>-Britta had an unusual rogue wave event at FINOI north of Borkum<br>-Anatol not described as serious rogue wave event similar to 1995 Draupner wave, Britta 2006, or Tilo 2007 |
| SMHI (20111013)                  | SMHI_20111013, Hosten 1999 - Arhundradets storm? 13Oct2011 ( <a href="https://www.smhi.se/kunskapsbanken/meteorologi/hosten-1999-arhundradets-storm-1.5762">https://www.smhi.se/kunskapsbanken/meteorologi/hosten-1999-arhundradets-storm-1.5762</a> )<br>-wind gusts in southern Skania at the 50y return period level or higher                                                                                                                                                                                                |

|                              |                                                                                                                                                                                                                                                                                                                                                                                                                                                                                                                                                                                              |
|------------------------------|----------------------------------------------------------------------------------------------------------------------------------------------------------------------------------------------------------------------------------------------------------------------------------------------------------------------------------------------------------------------------------------------------------------------------------------------------------------------------------------------------------------------------------------------------------------------------------------------|
| Gardiner et al (2012)        | Gardiner B, K Blennow, J-M Carnus, P Fleischer, F Ingemarson, G Landmann, M Lindner, M Marzano, B Nicoll, C Orazio, J-L Peyron, M-P Reviron, M-J Schelhaas, A Schuck, M Spielmann, T Usbeck, Destructive storm in European Forests: Past and Forthcoming Impacts, European Forest Institute, Atlantic European Regional Office - EFlAtlantic [pdf document properties: author=Barry Gardiner, datestamp=09Mar2012]<br>-forest damage: for Denmark Anatol was rank3 event since 1950 after 1967 & 1981; low rank for Sweden storm sequence 1999 rank1 event for Europe with 1990 storms rank2 |
| AON Benfield (2013)          | AON Benfield, Historie von 1703 bis 2012: Winterstuerme in Europea, Stand: Januar 2013<br>-worst hurricane of 20C for Denmark<br>-rank 15 insurance loss for Germany among storms reviewed 1703-2013<br>-new wind speed record set on Sylt                                                                                                                                                                                                                                                                                                                                                   |
| Danhostel-Ribe (2013)        | Danhostel-Ribe, Sturmfluten, <a href="https://web.archive.org/web/20131215125955/http://www.danhostel-ribe.dk/de/sturmfluten">https://web.archive.org/web/20131215125955/http://www.danhostel-ribe.dk/de/sturmfluten</a> , accessed 25Apr2021<br>-rank2 storm surge level at Ribe after 11Oct1634 Burchardi flood; same water level as 27Nov1825                                                                                                                                                                                                                                             |
| Fruergaard et al (2013)      | Fruergaard M, TJ Andersen, PN Johannessen, LH Nielsen, M Pejrup, Major coastal impact induced by a 1000-year storm event, Nature, Scientific Reports, 3:1051, DOI: 101038/srep01051, 2013.<br>-Anatol was rank 2 surge, 1m lower than 6.1m marked on Ribe Cathedral for surge 11-12Oct1634                                                                                                                                                                                                                                                                                                   |
| Humbling (2013)              | Humbling David, Weatherwatch: Our severe gales are not hurricanes, but they can be as deadly, The Guardian, 13Dec2013<br>-review of hurricane Anatol 1999 and damage to Denmark and Germany; defining event to compare with storm Xaver                                                                                                                                                                                                                                                                                                                                                      |
| Joyner (2013)                | Joyner, T.A., Optimizing peak gust and maximum sustained wind speed estimates from mid-latitude wave cyclones, Louisiana State University Doctoral Dissertations, 421, 2013<br>-Anatol one of 18 serious insurance storms between 1976-2010                                                                                                                                                                                                                                                                                                                                                  |
| Haeseler and Lefebvre (2013) | Haeseler S, C Lefebvre, Heavy storm Christian on 28 October 2013, DWD, 13Nov2013<br>-Anatol had rank1 gust for List/Sylt in Germany; record still stood after Storm Christian in Oct2012<br>-Anatol gust did not rank in top ten of any other coast station in Germany<br>-for Denmark, Anatol held record gust (51.4 m/s or 185 km/h) until storm Christian Oct2013 when Kegnaes Fyr registered gust 53.5m/s or 193km/h                                                                                                                                                                     |
| Pelt (2013)                  | Pelt, S., Kraftige storme med oprindelse i Nordatlanten, Vejret, 137, 44-47, 2013<br>-all 3 December storms achieved hurricane strength<br>-Anatol was the most powerful of the 3 December storms (with Lothar and Martin)<br>-there is broad consensus that Anatol was the most powerful storm to have hit Denmark during the instrumental period<br>-Anatol air pressure fell to 952.4hPa; it was a country-wide category 4 storm<br>-Storm Allan Oct 2013 had higher record winds but was shorter duration and limited area                                                               |
| Kristandt et al (2014)       | Kristandt, J, B Brecht, H Frank, H Knaack, Optimization of empirical storm surge forecast – modelling of high resolution wind fields, Die Kuste, 18, 301-308, 2014<br>-Storm Anatol had rank 21 storm surge of 39 surges 1962-2011<br>-1962 was rank1 as Norderney; Capella 1976 was highest water level for any station on North Sea coast                                                                                                                                                                                                                                                  |
| Roberts et al (2014)         | Roberts JF, AJ Champion, LC Dawkins, KI Hodes, LC Shaffrey, DB Stephenson, MA Stringer, HE Thornton, DB Youngman, The XWS open access catalogue of extreme European windstorms from 1979 to 2012, Nat. Hazards Earth Syst. Sci, 14, 2487-2501, 2014<br>-report opened with Anatol/Lothar/Martin Dec 1999 inflicted 2012USD 13.5billion & 150 fatalities<br>-Anatol rank 9 of 23 top insurance loss storms in period 1979-2013<br>-Anatol had higher wind speeds over a greater area but Lothar/Martin had higher insurance losses                                                            |
| Danish Energy Agency (2015)  | Danish Energy Agency, Security of Electricity Supply in Denmark, 1st edition 2015, translated 2016, Danish Energy Agency, Amaliegade 44, 1256 Copenhagen K, ISBN 978-87-93180-15-4<br>-Storm Anatol was worst storm of century<br>-storms Dec1999, Jan2005, Oct2013, Dec2013 were equal strength                                                                                                                                                                                                                                                                                             |
| Thejournal.ie (20151214)     | thejournal.ie, The deadliest storms to evr hit Europe, 14Dec2015 0610AM, <a href="https://www.thejournal.ie/europe-storms-2497164-Dec2015/">https://www.thejournal.ie/europe-storms-2497164-Dec2015/</a> , accessed 10Dec2020<br>-Storm Anatol rank 10 for monetary losses and rank 8 for fatalities (20)<br>-worst storm Lothar 1999 with 10.6b EUR damage and 110 fatalities                                                                                                                                                                                                               |
| Capellen (2018)              | Cappelen, J., Storm og ekstrem vind i Danmark - opgørelser og analyser til og med 2017, DMI rapport 18-07, Copenhagen 2018<br>-Anatol one of the four country-wide hurricanes of 20th century: 1902 Christmas storm, 17-18Oct1967, 25Nov1981, 03Dec1999<br>-described as most powerful storm in Danish area since start systematic measurement 1870s<br>-Surge coincided with low tide. If it had coincided with high water, water levels would have been as high as 1634, where water level was 612cm                                                                                       |
| Ditlevsen (2018)             | Ditlevsen C, MM Ramos, C Sorensen, UR Ciocan, T Pionkowitz, Hojvandsstatistikker 2017, Miljo- og Foedevareministeriet, Kystdirektoratet Lemvig, Februar, 2018<br>-Denmark storm surge water levels at rank 1 for some Denmark west coast stations                                                                                                                                                                                                                                                                                                                                            |
| Cappelen et al (2018b)       | Cappelen J, S Olufsen, MH Ribergaard, JW Nielsen, T Schmith, N Hansen, Stormfloden under decemberorkanen, updated 25Jun2018b, <a href="https://www.dmi.dk/vejr-og-atmosfare/temaforside-decemberorkanen-1999/stormfloden-under-decemberorkanen/">https://www.dmi.dk/vejr-og-atmosfare/temaforside-decemberorkanen-1999/stormfloden-under-decemberorkanen/</a><br>-if surge had come at astron high water (6h earlier or later) water levels 1-1.5m higher<br>-we would have had a surge of same level as 'manddrukningen i 1634'; worst ever Waddensee flood                                 |
| Decker (2018)                | Decker, Lauge, Windthrow risk assessment of Douglas-fir stands in Denmark. A comparison study of Douglas-fir (Pseudotsuga menziesii) and Norway spruce (Picea abies), M.Sc. thesis, University of Copenhagen, submitted 6Aug2018 [pdf properties: title=Notatbog; author=Lauge Decker, Subject=SKOG303 - Silviculture and forest growth yield]<br>-most serious recent Denmark windthrow storms: Anatol 1999, Gudrun 2005, Allan 2013, Bodil (2013)<br>-Anatol most serious storm as a country-wide category 4; Gudrun was a country-wide category 3                                         |
| Air Worldwide (20191219)     | Air Worldwide, Three severe storms together were a wake-up call, 19Dec2019.<br>-Anatol was Denmark's largest insured loss ever                                                                                                                                                                                                                                                                                                                                                                                                                                                               |

|                             |                                                                                                                                                                                                                                                                                                                                                                                                                                                                                               |
|-----------------------------|-----------------------------------------------------------------------------------------------------------------------------------------------------------------------------------------------------------------------------------------------------------------------------------------------------------------------------------------------------------------------------------------------------------------------------------------------------------------------------------------------|
|                             | -Denmark: Anatol completely exhausted many reinsurance covers                                                                                                                                                                                                                                                                                                                                                                                                                                 |
| Astleitner (2019)           | Astleitner, Thomas, 3. December 1999: Orkantief Anatol fegt ueber de Nordsee, <a href="https://uwr.de/de/a/3-dezember-1999-orkan-tief-anatol-trifft-deutschland">https://uwr.de/de/a/3-dezember-1999-orkan-tief-anatol-trifft-deutschland</a> , published 3Dec2019, accessed 20Sep2020<br>-new wind speed records for northern Germany during Anatol                                                                                                                                          |
| Capellen (2019)             | Capellen, John, Orkaner paa vore breddegrader, updated 8Jan2019 <a href="https://www.dmi.dk/vejr-og-atmosfare/temaforside-vind/orkaner-paa-vore-breddegrader/">https://www.dmi.dk/vejr-og-atmosfare/temaforside-vind/orkaner-paa-vore-breddegrader/</a> , (webpage downloaded 12Oct2020)<br>*-3Dec1999 Denmark impacted by most powerful hurricane ever<br>-record stood until hurricane Allan Oct 2013 /w highest avg=39.5m/s, gust 53.5m/s                                                  |
| World Energy Council (2019) | World Energy Council, Case Study Series, Extreme Weather, Windstorms France December 1999, <a href="https://www.worldenergy.org/assets/downloads/Windstorms_France_-_Extreme_weather_conditions_SEP_2019.pdf">https://www.worldenergy.org/assets/downloads/Windstorms_France_-_Extreme_weather_conditions_SEP_2019.pdf</a> , pdf date stamp: 11Oct2019<br>-Anatol storm Denmark insurance record 2bill EUR; insurers blieved such a loss impossible<br>-Anatol/Lothar/Martin were 100y events |
| Wikipedia (20210418)        | Wikipedia, Orkan Anatol, <a href="https://de.wikipedia.org/wiki/Orkan_Anatol">https://de.wikipedia.org/wiki/Orkan_Anatol</a> , accessed 18Apr2021<br>-Ribe rank2 surge after Burchardi 1634 surge; equal in height to 1825 surge                                                                                                                                                                                                                                                              |

Table SL5. Severe forecast (arranged by year and then alphabetically)

| Source                                       | Full Reference and Notes                                                                                                                                                                                                                                                                                                                                                                                                                                                                                                                                                                                                                        |
|----------------------------------------------|-------------------------------------------------------------------------------------------------------------------------------------------------------------------------------------------------------------------------------------------------------------------------------------------------------------------------------------------------------------------------------------------------------------------------------------------------------------------------------------------------------------------------------------------------------------------------------------------------------------------------------------------------|
| DMI (19991209)                               | DMI, Rapport. Orkanen over Danmark den 3.-4. december 1999, Danmarks Meteorologiske Institut, Lyngbyvej 100, DK-2100 Kobenhaven 0, 9Dec1999.<br>-hurricane passage over Denmark predicted at early point<br>-first indication of hurricane was in DMI 7d forecast broadcast Thu 02Dec 1030<br>-followed up Thu evening by DR TV meteorologist & weather presentation TV2 from DMI warning<br>-no doubt that there would be unusual and serious weather phenomenon                                                                                                                                                                               |
| Lloyd's Casualty Week (19991217)             | Lloyds Casualty Week, vol318, No12, 17Dec1999<br>-Sniegs fishing boat capsize and fatalities in Latvia due to severe storm forecast issued only previous day.                                                                                                                                                                                                                                                                                                                                                                                                                                                                                   |
| Beredskapsstyrelsen Udviklingsenheden (2000) | Beredskapsstyrelsen Udviklingsenheden, Den Samlede redningsberedskabssektors opgavelosning i forbindelse med orkanen d. 3.-4. december og stormen d. 17 december 1999 - En Tvaergaende evaluering og erfaringsopsamling. Februar 2000, Beredskapsstyrelsen, Beredskabsudviklingsenheden, Datavej 16, 3460 Birkerød, Telefon: 4590 6000, Telefax: 4590 6060, E-mail: bue@brs.dk, Internet: www.brs.dk<br>-word of hurricane at DMI Thursday 2Dec1999 1030MEZ in connection with 7d advance forecast<br>-earlier hurricane weather forecast on key sites was critized                                                                             |
| Nielsen and Nielsen (2000)                   | Nielsen, Jacob Woge and Nielsen, Mads Hvid, Stormfloden foraarsaget af orkanen den 3. december 1999, Vejret, 82, 8-14, Februar 2000<br>-DMI Mike21 surge model gave predicted water levels up to 2.5m below observed<br>-correct surge warning not sent out                                                                                                                                                                                                                                                                                                                                                                                     |
| Voldberg (2000)                              | Voldberg Henrik, Vredens julemaanend, Vejret, 82, no.1, 1-7, Feb, 2000.<br>-numerical model gave indications of severe Denmark storm on 3Dec from Tuesday 30Nov<br>-not possible to see how violet it would become; trajectory uncertain<br>-confirmation of numerical forecasts not until 0000UTC 3Dec1999 when stations NW Ireland had 10mb pressure drop in 3h                                                                                                                                                                                                                                                                               |
| Woetmann Nielsen (2000)                      | Woetmann Nielsen, AN, DMI-HIRLAM's forudsigelse af orkanen den 3.december 1999. Vejret, 82, pp. 19-23, februar 2000.<br>-Denmark 3 Dec storm first appeared in advance forecasts from 28Nov of the experimental DMI hemispheric model<br>-storm forecast 2 days in advance in the normal DMI operational model (as good as physically possible)                                                                                                                                                                                                                                                                                                 |
| Buizza and Hollingsworth (2001)              | Buizza, Roberto and Anthony Hollingsworth, Severe weather prediction using the ECMWF EPS - The European Storms of December 1999, ECMWF Newsletter, No. 89, Winter 2000/01.<br>-EPS gave some indication of severe storm from 28Nov<br>-steady improvement in EPS predictions from one day to next<br>-EPS consensus of storm with >50% of members only took place 24-30h before event<br>-high resolution HEPS gave better predictions with >50% member onverging on storm 55h before event<br>-normal operation forecast model gave different forecasts from one day to next                                                                   |
| Buizza and Hollingsworth (2002)              | Buizza, Roberto and Anthony Hollingsworth, Storm predicton over Europe using the ECMWF ensemble prediction system, Meteorol. Appl., 9, 2002<br>-EPS gave some indication of severe storm from 28Nov<br>-steady improvement in EPS predictions from one day to next<br>-EPS consensus of storm with >50% of members only took place 24-30h before event<br>-high resolution HEPS gave better predictions with >50% member onverging on storm 55h before event<br>-normal operation forecast model gave different forecasts from one day to next                                                                                                  |
| Mueller-Navarra et al (2003)                 | Mueller-Navarra SH, W Lang, S Dick, KC Soetje, Ueber de Verfahren der Wasserstands- und Stormflutvorhersage. Hydrodynamisch-numerische Modelle der Nord- und Ostsee und ein empirisch-statistisches Verfahren fuer die Deutsche Bucht, promet. Jahrg. 29, Nr 1-4, 117-124, June 2003<br>-extraordinary storm event forecast from midday 02Dec1999<br>-precise storm surge forecasts can only be given 18h in advance                                                                                                                                                                                                                            |
| Woetmann Nielsen and Hansen Sass (2003)      | Woetmann Nielsen N and B Hansen Sass, A numerical, high-resolution study of the life cycle of the severe storm over Denmark on 3Dec1999, Tellus, 55A, 338-351, 2003.<br>-DMI HIRLAM made a fair prediction of the Denmark storm 48h in advance                                                                                                                                                                                                                                                                                                                                                                                                  |
| Cappelen et al (2018a)                       | Cappelen J, S Olufsen, MH Ribegaard, JW Nielsen, T Schmith, N Hansen, Det traekker op til orkan, updated 25Jun2018a, <a href="https://www.dmi.dk/vejr-og-atmosfare/temaforside-decemberorkanen-1999/det-traekker-op-til-orkan/">https://www.dmi.dk/vejr-og-atmosfare/temaforside-decemberorkanen-1999/det-traekker-op-til-orkan/</a><br>-already on 30Nov1999 model prognosis of violent storm in development<br>-02Dec1999 model prognosis showed very power low pressure under steady development<br>could give wind of hurricane strength<br>-first indication of hurricane appeared in DMI 7day forecast sent on Thursday 02Dec1999 10:30M? |

|                        |                                                                                                                                                                                                                                                                                                                                                                                                                                                                                                                           |
|------------------------|---------------------------------------------------------------------------------------------------------------------------------------------------------------------------------------------------------------------------------------------------------------------------------------------------------------------------------------------------------------------------------------------------------------------------------------------------------------------------------------------------------------------------|
|                        | -early Friday 3Dec ... the low pressure was deepening explosively<br>-within 12h central pressure fell from 996hPa to 958hPa on way west from Hebrides to central Nsea                                                                                                                                                                                                                                                                                                                                                    |
| Cappelen et al (2018g) | Cappelen J, S Olufsen, MH Ribergaard, JW Nielsen, T Schmith, N Hansen, Bringer fremtiden flerer decemberorkaner? 25Jun2018f, <a href="https://www.dmi.dk/vejr-og-atmosfare/temaforside-decemberorkanen-1999/bringer-fremtiden-flere-decemberorkaner/">https://www.dmi.dk/vejr-og-atmosfare/temaforside-decemberorkanen-1999/bringer-fremtiden-flere-decemberorkaner/</a><br>-DMI forecast the Anatol hurricane the day before<br>-one of the problems with the hurricane was that many did not know how violent it can be |

Table SL6. Storm not as bad as expected; not as bad as it could have been (arranged by year and then alphabetically)

| Source                     | Full Reference and Notes                                                                                                                                                                                                                                                                                                                                                                                                                                                                                             |
|----------------------------|----------------------------------------------------------------------------------------------------------------------------------------------------------------------------------------------------------------------------------------------------------------------------------------------------------------------------------------------------------------------------------------------------------------------------------------------------------------------------------------------------------------------|
| Nielsen and Nielsen (2000) | Nielsen, Jacob Woge and Nielsen, Mads Hvid, Stormfloden foraarsaget af orkanen den 3. december 1999, Vejret, 82, 8-14, Februar 2000<br>-surge max occurred at low water<br>-if surge max at high water, water levels would have been 1m higher; catastrophe                                                                                                                                                                                                                                                          |
| Munich Re (2002)           | Munich Re, Winter Storms in Europe (II), Analysis of 1999 losses and loss potentials, Muenchener Rueck, Munich Re Group, 76pp, 2002<br>-no major damage to dykes in Germany                                                                                                                                                                                                                                                                                                                                          |
| Herrling et al (2010)      | Herrling Gerald, Heiko Knaack, Ralf Kaiser, Hanz D. Niemayer, Evaluation of design water levels at the Ems-Dollard estuary considering the effect of a storm surge barrier, 32nd Conference on Coastal Engineering 2010, Shanghai, China, 30Jun-05Jul2020. ed by JM Smith and P Lynett, pp. 3899-3917, [pdf document properties: title=ICCE2020_Ems_final, datestamp=15Sep2010<br>-water levels during Anatol were low because wind from southwest during peak tide                                                  |
| Danhostel-Ribe (2013)      | Danhostel-Ribe, Sturmfluten, <a href="https://web.archive.org/web/20131215125955/http://www.danhostel-ribe.dk/de/sturmfluten">https://web.archive.org/web/20131215125955/http://www.danhostel-ribe.dk/de/sturmfluten</a> , accessed 25Apr2021<br>-Ribe did not have sea flooding because water level 0.3m below dike crest of 7.0m<br>-50% of houses damaged by strong winds; mostly roof damage<br>-if surge had arrived during high tide, water levels would have been 1-1.5m higher; Ribe would have been flooded |
| Joyner (2013)              | Joyner, T.A., Optimizing peak gust and maximum sustained wind speed estimates from mid-latitude wave cyclones, Louisiana State University Doctoral Dissertations, 421, 2013<br>-Anatol storm impact relatively mild in Sweden                                                                                                                                                                                                                                                                                        |
| Capellen (2019)            | Capellen, John, Orkaner paa vore breddegrader, updated 8Jan2019 <a href="https://www.dmi.dk/vejr-og-atmosfare/temaforside-vind/orkaner-paa-vore-breddegrader/">https://www.dmi.dk/vejr-og-atmosfare/temaforside-vind/orkaner-paa-vore-breddegrader/</a> , (webapage downloaded 12Oct2020)<br>-Ribe water level reached 5.12m; instrument malfunction<br>*-surge occurred at low water; could have been 1-1.5m higher if at astronomical high water                                                                   |

Table SL7. Storm worse than expected (arranged by year and then alphabetically)

| Source                                       | Full Reference and Notes                                                                                                                                                                                                                                                                                                                                                                                                                                                                                                                                                                                           |
|----------------------------------------------|--------------------------------------------------------------------------------------------------------------------------------------------------------------------------------------------------------------------------------------------------------------------------------------------------------------------------------------------------------------------------------------------------------------------------------------------------------------------------------------------------------------------------------------------------------------------------------------------------------------------|
| Focus (1999)                                 | Focus, Strandfresser Anatol, Nr.50, 1999 (correspondent Birte Siedenborg), <a href="https://www.focus.de/politik/deutschland/sylt-strandfresser-anatol_aid_178994.html">https://www.focus.de/politik/deutschland/sylt-strandfresser-anatol_aid_178994.html</a><br>-interrupted car train service at Hindenburg; people sitting in cars on train for 6h at height of storm<br>-wind destroyed mobile homes; hundreds of roofs damaged<br>-70% of houses damaged at beach front                                                                                                                                      |
| Kristeligt Dagblad (1999)                    | Kristeligt Dagblad, Orkan haergede landet over. Paa vestkysten naede vindstyrken op pa 47 sekundmeter, 4Dec1999 00:00<br>-DMI watch chief Niels Thyge Rasmussen says Anatol was some of the worst storm weather Denmark has ever experienced                                                                                                                                                                                                                                                                                                                                                                       |
| RWS (1999)                                   | RWS, Verslag van de Stormvloed van 3 en 4 december 1999 (SR79), Ministerie van VerKeer en Waterstaat, Directoraat-Generaal Rijkswaterstaat, Rijksinstituut voor Kust en Zee, Stormvloedwaarschuwingsdienst, Postbus 20907, 2500EX 's-Gravenhage, 's-Gravenhage, december 1999.<br>-forecast water levels Delfzijl 0.36m higher than expected                                                                                                                                                                                                                                                                       |
| Beredskapsstyrelsen Udviklingsenheden (2000) | Beredskapsstyrelsen Udviklingsenheden, Den Samlede redningsbredskabssektors opgavelosning i forbindelse med orkanen d. 3.-4. december og stormen d. 17 december 1999 - En Tvaergaende evaluering og erfaringsopsamling. Februar 2000, Beredskapsstyrelsen, Beredskabsudviklingsenheden, Datavej 16, 3460 Birkerød, Telefon: 4590 6000, Telefax: 4590 6060, E-mail: bue@brs.dk, Internet: www.brs.dk<br>-worst Denmark hurricane of 20th C (time scale longer than 1 generation; outside living memory)<br>-hurricane forecast on key internet sites criticized<br>-call centers for emergency services overwhelmed |
| Mann and Hansen (2000)                       | Mann AJ, SO Hansen, En storm gor ingen norm, Vejret, no1. 22.Argang, 82, pp.28-34, Februar 2000.<br>-increasing estimates of insurance losses followign the storm<br>-roof and cladding damage should have been within thresholds Danish construction guideline thresholds<br>-10min wind speed and 1s gust at top of Horns Rev highest ever recorded in Denmark                                                                                                                                                                                                                                                   |
| Neckelsen and Petersen (2000)                | Neckelmann, S. and J. Petersen, Evaluation of the stand-alone wind and wave measurement systems for Horns Rev 150MW offshore wind farm in Denmark, OWEMES 2000, ATENA, Rome, Sicily, pp.17-27, 2000<br>-waves hit Horns Rev mast junction box shed at 6.2m above sea level; forced out power cables & caused 10 day power outage                                                                                                                                                                                                                                                                                   |
| Voldberg (2000)                              | Voldberg Henrik, Vredens julemaaned, Vejret, 82, no.1, 1-7, Feb, 2000.<br>-storm described as century event<br>-numerical model gave indications of severe Denmark storm on 3Dec from Tuesday 30Nov<br>-not possible to see how violent it would become; trajectory uncertain                                                                                                                                                                                                                                                                                                                                      |
| Sommer (2002)                                | Sommer A, Wind Resources at Horns Rev, Eltra PSO-2000 Proj nr. EG-05 3248, Tech-wise, 2002.<br>-primary measurement instrument system went down for 10d when Anatol wave strikes instrument cabin pushed power plugs out of sockets                                                                                                                                                                                                                                                                                                                                                                                |
| Tatge (2009)                                 | Tatge, Yoern, Looking back, looking forward: Anatol, Lothar and Martin ten years later, 09Dec2009. <a href="https://www.air-worldwide.com/publications/air-currents/looking-back-looking-forward-anatol-lothar-and-">https://www.air-worldwide.com/publications/air-currents/looking-back-looking-forward-anatol-lothar-and-</a>                                                                                                                                                                                                                                                                                   |

|                       |                                                                                                                                                                                                                                                                                                                                                                                                                                           |
|-----------------------|-------------------------------------------------------------------------------------------------------------------------------------------------------------------------------------------------------------------------------------------------------------------------------------------------------------------------------------------------------------------------------------------------------------------------------------------|
|                       | <p>martin-ten-years-later/<br/>         -insurance industry did not assess severe storm event like 1990 to be frequent enough to justify re-insurance cover for scale of Anatol damage<br/>         -for Denmark; Anatol storm damage was an order of magnitude more than the next most severe storm winter 1981</p>                                                                                                                      |
| Cappelen et al (2018) | <p>Cappelen J, S Olufsen, MH Ribegaard, JW Nielsen, T Schmith, N Hansen, Det traekker op til orkan, updated 25Jun2018, <a href="https://www.dmi.dk/vejr-og-atmosfare/temaforside-decemberorkanen-1999/det-traekker-op-til-orkan/">https://www.dmi.dk/vejr-og-atmosfare/temaforside-decemberorkanen-1999/det-traekker-op-til-orkan/</a><br/>         -no doubt that we will be standing over an unusual and serious weather phenomenon</p> |

Table SL8. Storm duration; extended period bad weather (arranged by year and then alphabetically)

| Source                                       | Full Reference and Notes                                                                                                                                                                                                                                                                                                                                                                                                                                                                                                                                                                                                                                                                                                                                                                                                                                                                                                                                                                                                                                                                                                                                   |
|----------------------------------------------|------------------------------------------------------------------------------------------------------------------------------------------------------------------------------------------------------------------------------------------------------------------------------------------------------------------------------------------------------------------------------------------------------------------------------------------------------------------------------------------------------------------------------------------------------------------------------------------------------------------------------------------------------------------------------------------------------------------------------------------------------------------------------------------------------------------------------------------------------------------------------------------------------------------------------------------------------------------------------------------------------------------------------------------------------------------------------------------------------------------------------------------------------------|
| Bancroft (1999)                              | <p>George P. Bancroft, Marine Weather Review - North Atlantic Area September through December 1999, Mariners Weather Log, Vol.44, No.1, April 2000.<br/>         pp.23-38.<br/>         -weather map with North European storm 30Nov1999</p>                                                                                                                                                                                                                                                                                                                                                                                                                                                                                                                                                                                                                                                                                                                                                                                                                                                                                                               |
| DMI (19991209)                               | <p>DMI, Rapport. Orkanen over Danmark den 3.-4. december 1999, Danmarks Meteorologiske Institut, Lyngbyvej 100, DK-2100 Kobenhavn 0, 9Dec1999.<br/>         -hurricane strength winds over extended period<br/>         -1st observations of storm strength 25m/s 15:00 MET; lasted until 2300 Jyllands W coast<br/>         -hurricane strength or greater 17:00-19:00</p>                                                                                                                                                                                                                                                                                                                                                                                                                                                                                                                                                                                                                                                                                                                                                                                |
| Focus (1999)                                 | <p>Focus, Strandfresser Anatol, Nr.50, 1999 (correspondent Birte Siedenburg), <a href="https://www.focus.de/politik/deutschland/sylt-strandfresser-anatol_aid_178994.html">https://www.focus.de/politik/deutschland/sylt-strandfresser-anatol_aid_178994.html</a><br/>         -car train service at Hindenburg interrupted for 6h at height of storm</p>                                                                                                                                                                                                                                                                                                                                                                                                                                                                                                                                                                                                                                                                                                                                                                                                  |
| Lloyd's Casualty Week (19991210)             | <p>Lloyd's Casualty Week, vol.318, No.11, Dec10, 1999<br/>         -severe winter storms Scandinavia 30Nov1999 (Finland and Sweden)<br/>         -ship accidents Bay of Biscay, eastern Atlantic in week before Storm Xaver</p>                                                                                                                                                                                                                                                                                                                                                                                                                                                                                                                                                                                                                                                                                                                                                                                                                                                                                                                            |
| RWS (1999)                                   | <p>RWS, Verslag van de Stormvloed van 3 en 4 december 1999 (SR79), Ministerie van Verkeer en Waterstaat, Directoraat-Generaal Rijkswaterstaat, Rijksinstituut voor Kust en Zee, Stormvloedwaarschuwingsdienst, Postbus 20907, 2500EX 's-Gravenhage, 's-Gravenhage, december 1999.<br/>         -Storm Anatol was short duration storm for Dutch storm surge service<br/>         -preceding surge warning 27Nov1999 Schelde and West Holland<br/>         -preceding surge warning 01Dec1999 Delfzijl</p>                                                                                                                                                                                                                                                                                                                                                                                                                                                                                                                                                                                                                                                  |
| Vedin and Alexandersson (1999)               | <p>Vedin, Haldo and Hans Alexandersson, Aarhunderadets storm? Vaader och Vatten, p.18, Dec, 1999<br/>         -four southern Sweden storms from end November to mid-December<br/>         -first storm passed 29Nov<br/>         -highest wind speed 29m/s at Masekar outside Orust<br/>         -winds to 27m/s at Harstena at Ostgotakusten in spite of west wind from land<br/>         -1.5d later wind blew not quite so hard<br/>         -highest wind night 30Nov-1Dec at 25m/s at Masekar on Orskar in N Uppland; wind from west<br/>         -third and last storm passed during night to 4Dec and was clearly the worst<br/>         -started in Atlantic W of Ireland in evening of 2Dec<br/>         -moved NNE via Scotland and Nsea to Jylland where it culminated 19MET 3Dec at 953hPa central pressure<br/>         -during following night passed over Gotland<br/>         -Sweden winds blew at 33m/s at Hano (hurricane strength); 30m/s at Falsterbo<br/>         -wind direction approx SW; highest winds Skane and Blekinge<br/>         -later another storm on 17-18Dec with 17m/s Hano &amp; 25m/s at Nidingen and Harstena</p> |
| Beredskapsstyrelsen Udviklingsenheden (2000) | <p>Beredskapsstyrelsen Udviklingsenheden, Den Samlede redningsberedskabssektors opgavelosning i forbindelse med orkanen d. 3.-4. december og stormen d. 17 december 1999 - En Tvaergaende evaluering og erfaringsopsamling. Februar 2000, Beredskapsstyrelsen, Beredskabsudviklingsenheden, Datavej 16, 3460 Birkerød, Telefon: 4590 6000, Telefax: 4590 6060, E-mail: bue@brs.dk, Internet: www.brs.dk<br/>         -Denmark storm on 17Dec1999</p>                                                                                                                                                                                                                                                                                                                                                                                                                                                                                                                                                                                                                                                                                                       |
| Rosenorn (2000)                              | <p>Rosenorn, Af Stig, De kraftigste storme i det tyvende aarhundrede i Danmark, Vejret, 82, 15-18, Februar 2000<br/>         -1999 storm shorter duration compared with 1981 but more powerful</p>                                                                                                                                                                                                                                                                                                                                                                                                                                                                                                                                                                                                                                                                                                                                                                                                                                                                                                                                                         |
| Voldberg (2000)                              | <p>Voldberg Henrik, Vredens julemaaned, Vejret, 82, no.1, 1-7, Feb, 2000.<br/>         -Dec2000 reported as particularly stormy with 2 Denmark storms and 2 France storms; additional storm end Jan2000</p>                                                                                                                                                                                                                                                                                                                                                                                                                                                                                                                                                                                                                                                                                                                                                                                                                                                                                                                                                |
| Sommer (2002)                                | <p>Sommer A, Wind Resources at Horns Rev, Eltra PSO-2000 Proj nr. EG-05 3248, Tech-wise, 2002.<br/>         -maximum wind period lasted 2.5h</p>                                                                                                                                                                                                                                                                                                                                                                                                                                                                                                                                                                                                                                                                                                                                                                                                                                                                                                                                                                                                           |
| Woetmann Nielsen and Hansen Sass (2003)      | <p>Woetmann Nielsen N and B Hansen Sass, A numerical, high-resolution study of the life cycle of the severe storm over Denmark on 3Dec1999, Tellus, 55A, 338-351, 2003.<br/>         -rapid development of storm</p>                                                                                                                                                                                                                                                                                                                                                                                                                                                                                                                                                                                                                                                                                                                                                                                                                                                                                                                                       |
| Mueller-Navarra (2005)                       | <p>Mueller-Navarra, Sylvain, Sturmfluten. Land under an Nord- und Ostsee, in: Entfesselte Elemente-Der Mensch und die Kraefte der Natur, 5, 92-99, Guetersloh. Wissen-Media-Verl., 2005<br/>         -Storm Anatol belonged to Circulation type of surge for low pressure centre mving quickly over British Isles and intensifying over the North Sea<br/>         -Cuxhaven water levels 1.5m above normal at low tide and reached 4.53m NN in 6 hours</p>                                                                                                                                                                                                                                                                                                                                                                                                                                                                                                                                                                                                                                                                                                |
| Frank and Majewski (2006)                    | <p>Frank, H, and D Majewski, Hindcasts of historic storms with the DWD models GME, LMQ and LMK using ERA-40 reanalysis, ECMWF Newsletter No. 109, autumn 2006, pp.16-21.<br/>         -Anatol very fast storm crossing North Sea in 12 h</p>                                                                                                                                                                                                                                                                                                                                                                                                                                                                                                                                                                                                                                                                                                                                                                                                                                                                                                               |
| Nilsson et al (2007)                         | <p>Nilsson C, S Goyette, L Barring, Relating forest damage data to the wind field from high-resolution RCM simulations: case study of Anatol striking Sweden in December 1999, Global and Planetary Change, 57, 161-176, 2007.<br/>         -preceding storm in early Dec 1999 may have weakened tree root systems in southern Sweden</p>                                                                                                                                                                                                                                                                                                                                                                                                                                                                                                                                                                                                                                                                                                                                                                                                                  |
| Von Storch and Woth (2008)                   | <p>von Storch, Hans and Katja Woth, Storm surges: perspectives and options, Sustain Sci, 3, 33-43, 2008<br/>         -Anatol was a rather small fast moving storm with a fetch 100-200km in 1999 in the North Sea area</p>                                                                                                                                                                                                                                                                                                                                                                                                                                                                                                                                                                                                                                                                                                                                                                                                                                                                                                                                 |

|                        |                                                                                                                                                                                                                                                                                                                                                                                                                                                                                                                                                                    |
|------------------------|--------------------------------------------------------------------------------------------------------------------------------------------------------------------------------------------------------------------------------------------------------------------------------------------------------------------------------------------------------------------------------------------------------------------------------------------------------------------------------------------------------------------------------------------------------------------|
|                        | -Anatol was unusually small for extratropical cyclone and similar to tropical storm in size                                                                                                                                                                                                                                                                                                                                                                                                                                                                        |
| SMHI (20111013)        | SMHI_20111013, Hosten 1999 - Arhundradets storm? 13Oct2011<br>( <a href="https://www.smhi.se/kunskapsbanken/meteorologi/hosten-1999-arhundradets-storm-1.5762">https://www.smhi.se/kunskapsbanken/meteorologi/hosten-1999-arhundradets-storm-1.5762</a> )<br>-3 storms in succession starting on 29Nov1999 and ending with Anatol                                                                                                                                                                                                                                  |
| Ge et al. (2014)       | Ge J, D Much, J Kappenberg, O Nino, P Ding, Z Chen, Simulating storm flooding maps over Hafencity under present and sea level rise scenarios, Journal of Flood Risk Management, 7, 319-331, 2014.<br>-approximate 1m storm surge started already on 1Dec1999                                                                                                                                                                                                                                                                                                       |
| Roberts et al (2014)   | Roberts JF, AJ Champion, LC Dawkins, KI Hodes, LC Shaffrey, DB Stephenson, MA Stringer, HE Thornton, DB Youngman, The XWS open access catalogue of extreme European windstorms from 1979 to 2012, Nat. Hazards Earth Syst. Sci, 14, 2487-2501, 2014<br>-Anatol was fast-moving storm                                                                                                                                                                                                                                                                               |
| Cappelen et al (2018b) | Cappelen J, S Olufsen, MH Ribergaard, JW Nielsen, T Schmith, N Hansen, Stormfloden under decemberorkanen, updated 25Jun2018b, <a href="https://www.dmi.dk/vejr-og-atmosfare/temaforside-decemberorkanen-1999/stormfloden-under-decemberorkanen/">https://www.dmi.dk/vejr-og-atmosfare/temaforside-decemberorkanen-1999/stormfloden-under-decemberorkanen/</a><br>-in Waddensee surge water levels fell quickly after maximum<br>-high water levels lasted longer on Danish west coast<br>-second high water shortly after midnight that lasted until morning 04Dec |
| Cappelen et al (2018e) | Cappelen J, S Olufsen, MH Ribergaard, JW Nielsen, T Schmith, N Hansen, Orkan passerer, updated 25Jun2018e, <a href="https://www.dmi.dk/vejr-og-atmosfare/temaforside-decemberorkanen-1999/orkanen-passerer/">https://www.dmi.dk/vejr-og-atmosfare/temaforside-decemberorkanen-1999/orkanen-passerer/</a><br>-winds storm force or higher 1500-2300MET 3Dec1999 in Denmark                                                                                                                                                                                          |
| Surgewatch (20201013)  | Surgewatch, Storm event 28th November 1999, <a href="https://www.surgewatch.org/events/1999_11_28/">https://www.surgewatch.org/events/1999_11_28/</a> , accessed 13Oct2020<br>-surge and overtopping in Solent area 28Nov1999                                                                                                                                                                                                                                                                                                                                      |
| Wikipedia (20210418)   | Wikipedia, Orkan Anatol, <a href="https://de.wikipedia.org/wiki/Orkan_Anatol">https://de.wikipedia.org/wiki/Orkan_Anatol</a> , accessed 18Apr2021<br>-rapid development of storm center between 2Dec and 3Dec1999                                                                                                                                                                                                                                                                                                                                                  |

Table SL9. Names of the storm (arranged by year and then alphabetically)

| Name   | Full Reference and Notes                                                                                                                                                                                                                                                                                                                                                                                                                                                                                                                                                                                                                                                                                                                                                                                                                                                                                                                                                                                                                                                                                                                                                                                                                                                                                                                                                                                                                                                                                                                                                                                                                                                                                                                                                                                                                                                                                                                                                                                                                                                                                                                                                                                                                                                                                                                                                                                                                                                                                                                                                                                                                                                                                                                                                                                                                                                                                                                                                                                                                                                                                                                                                                                                                                                                                                                                                                                                                                                                                                                                                                                                                                                                                                                                                                                                                                                                                                                        |
|--------|-------------------------------------------------------------------------------------------------------------------------------------------------------------------------------------------------------------------------------------------------------------------------------------------------------------------------------------------------------------------------------------------------------------------------------------------------------------------------------------------------------------------------------------------------------------------------------------------------------------------------------------------------------------------------------------------------------------------------------------------------------------------------------------------------------------------------------------------------------------------------------------------------------------------------------------------------------------------------------------------------------------------------------------------------------------------------------------------------------------------------------------------------------------------------------------------------------------------------------------------------------------------------------------------------------------------------------------------------------------------------------------------------------------------------------------------------------------------------------------------------------------------------------------------------------------------------------------------------------------------------------------------------------------------------------------------------------------------------------------------------------------------------------------------------------------------------------------------------------------------------------------------------------------------------------------------------------------------------------------------------------------------------------------------------------------------------------------------------------------------------------------------------------------------------------------------------------------------------------------------------------------------------------------------------------------------------------------------------------------------------------------------------------------------------------------------------------------------------------------------------------------------------------------------------------------------------------------------------------------------------------------------------------------------------------------------------------------------------------------------------------------------------------------------------------------------------------------------------------------------------------------------------------------------------------------------------------------------------------------------------------------------------------------------------------------------------------------------------------------------------------------------------------------------------------------------------------------------------------------------------------------------------------------------------------------------------------------------------------------------------------------------------------------------------------------------------------------------------------------------------------------------------------------------------------------------------------------------------------------------------------------------------------------------------------------------------------------------------------------------------------------------------------------------------------------------------------------------------------------------------------------------------------------------------------------------------|
| Adam   | Neckelmann, S. and J. Petersen, Evaluation of the stand-alone wind and wave measurement systems for Horns Rev 150MW offshore wind farm in Denmark, OWEMES 2000, ATENA, Rome, Sicily, pp.17-27, 2000<br>Capellen, John, Orkaner paa vore breddegrader, updated 8Jan2019 <a href="https://www.dmi.dk/vejr-og-atmosfare/temaforside-vind/orkaner-paa-vore-breddegrader/">https://www.dmi.dk/vejr-og-atmosfare/temaforside-vind/orkaner-paa-vore-breddegrader/</a> , (webapage downloaded 12Oct2020)                                                                                                                                                                                                                                                                                                                                                                                                                                                                                                                                                                                                                                                                                                                                                                                                                                                                                                                                                                                                                                                                                                                                                                                                                                                                                                                                                                                                                                                                                                                                                                                                                                                                                                                                                                                                                                                                                                                                                                                                                                                                                                                                                                                                                                                                                                                                                                                                                                                                                                                                                                                                                                                                                                                                                                                                                                                                                                                                                                                                                                                                                                                                                                                                                                                                                                                                                                                                                                                |
| Anatol | Ulblich U, AH Fink, M Klawa, JG Pinto, Three extreme storms over Europe in December 1999, Weather 56, 70-80, 2001<br>DWD, Orkantief 'Anatol' von 3./4. Dezember 1999 (5pp), <a href="https://www.dwd.de/DE/leistungen/besondereereignisse/stuerme/19991204_orkantief_anatol.pdf">https://www.dwd.de/DE/leistungen/besondereereignisse/stuerme/19991204_orkantief_anatol.pdf</a> [pdf document properties: datestamp: 28May2002]<br>Munich Re, Winter Storms in Europe (II), Analysis of 1999 losses and loss potentials, Muenchener Rueck, Munich Re Group, 76pp, 2002<br>Mueller-Navarra SH, W Lang, S Dick, KC Soetje, Ueber de Verfahren der Wasserstands- und Stormflutvorhersage. Hydrodynamisch-numerische Modelle der Nord- und Ostsee und ein empirisch-statistisches Verfahren fuer die Deutsche Bucht, promet. Jahrg. 29, Nr 1-4, 117-124, June 2003<br>Mueller-Navarra, Sylvin, Sturmfluten. Land under an Nord- und Ostsee, in: Entfesselte Elemente-Der Mensch und die Kraefte der Natur, 5, 92-99, Guetersloh. Wissen-Media-Verl., 2005<br>Jensen J, C Mudersbach, SH Mueller-Navarra, I Bork, C Koziar, V Renner, Modellgestuetzte Untersuchungen zu Sturmfluten mit sehr geringen Eintrittswahrscheinlichkeiten an der deutschen Nordseekueste, Die Kueste, 71, 123-167, 2006.<br>Nilsson C, S Goyette, L Barring, Relating forest damage data to the wind field from high-resolution RCM simulations: case study of Anatol striking Sweden in December 1999, Global and Planetary Change, 57, 161-176, 2007.<br>Fink AH, T Brucher, V Ermert, A Kruger, JG Pinto, The European storm Kyrill in Jan 2007: synoptic evolution, meteorological impacts and some considerations with respect to climate change, Natural Hazards and Earth System Sciences, 9, 405-423, 2009.<br>Tatge, Yoern, Looking back, looking forward: Anatol, Lothar and Martin ten years later, 09Dec2009. <a href="https://www.air-worldwide.com/publications/air-currents/looking-back-looking-forward-anatol-lothar-and-martin-ten-years-later/">https://www.air-worldwide.com/publications/air-currents/looking-back-looking-forward-anatol-lothar-and-martin-ten-years-later/</a><br>Herrling Gerald, Heiko Knaack, Ralf Kaiser, Hanz D. Niemayer, Evaluation of design water levels at the Ems-Dollard estuary considering the effect of a storm surge barrier, 32nd Conference on Coastal Engineering 2010, Shanghai, China, 30Jun-05Jul2020. ed by JM Smith and P Lynett, pp. 3899-3917, [pdf document properties: title=ICCE2020_Ems_final, datestamp=15Sep2010<br>Gatey, DA, The analysis of extreme synoptic winds, Ph.D. Thesis, University of Western Ontario, 2011. University of Western Ontario - Electronic Thesis and Dissertation Repository. Paper 268.<br>Sieber, Jeanette, Impacts of extreme hydro-meteorological events on electricity generation and possible adaptation measures. A GIS-based approach for corporate risk management and enhanced climate mitigation concepts in Germany. Ph.D. thesis, Julius-Maximilians-Universitaet Wuerzburg - Institut fuer Geographie, Karlsruhe, November 2012<br>AON Benfield, Historie von 1703 bis 2012: Winterstuerme in Europea, Stand: Januar 2013<br>Joyner, T.A., Optimizing peak gust and maximum sustained wind speed estimates from mid-latitude wave cyclones, Louisiana State University Doctoral Dissertations, 421, 2013<br>Pelt, S., Kraftige storme med oprindelse i Nordatlanten, Vejret, 137, 44-47, 2013<br>Ge J, D Much, J Kappenberg, O Nino, P Ding, Z Chen, Simulating storm flooding maps over Hafencity under present and sea level rise scenarios, Journal of Flood Risk Management, 7, 319-331, 2014.<br>Roberts JF, AJ Champion, LC Dawkins, KI Hodes, LC Shaffrey, DB Stephenson, MA Stringer, HE Thornton, DB Youngman, The XWS open access catalogue of extreme European windstorms from 1979 to 2012, Nat. Hazards Earth Syst. Sci, 14, 2487-2501, 2014 |

|                             |                                                                                                                                                                                                                                                                                                                                                                                                                                                                                                                                                                                                                                                                                                                                                                                                                                                                                                                                                                                                                                                                                                                                                                                                                           |
|-----------------------------|---------------------------------------------------------------------------------------------------------------------------------------------------------------------------------------------------------------------------------------------------------------------------------------------------------------------------------------------------------------------------------------------------------------------------------------------------------------------------------------------------------------------------------------------------------------------------------------------------------------------------------------------------------------------------------------------------------------------------------------------------------------------------------------------------------------------------------------------------------------------------------------------------------------------------------------------------------------------------------------------------------------------------------------------------------------------------------------------------------------------------------------------------------------------------------------------------------------------------|
|                             | Capellen, John, Orkaner paa vore breddegrader, updated 8Jan2019 <a href="https://www.dmi.dk/vejr-og-atmosfare/temaforside-vind/orkaner-paa-vore-breddegrader/">https://www.dmi.dk/vejr-og-atmosfare/temaforside-vind/orkaner-paa-vore-breddegrader/</a> , (webapage downloaded 12Oct2020)                                                                                                                                                                                                                                                                                                                                                                                                                                                                                                                                                                                                                                                                                                                                                                                                                                                                                                                                 |
| Storm Carola                | Wikipedia, Orkan Anatol, <a href="https://de.wikipedia.org/wiki/Orkan_Anatol">https://de.wikipedia.org/wiki/Orkan_Anatol</a> , accessed 18Apr2021                                                                                                                                                                                                                                                                                                                                                                                                                                                                                                                                                                                                                                                                                                                                                                                                                                                                                                                                                                                                                                                                         |
| Danish storm                | Buizza, Roberto and Anthony Hollingsworth, Severe weather prediction using the ECMWF EPS - The European Storms of December 1999, ECMWF Newsletter, No. 89, Winter 2000/01.<br>Buizza, Roberto and Anthony Hollingsworth, Storm prediction over Europe using the ECMWF ensemble prediction system, Meteorol. Appl., 9, 2002                                                                                                                                                                                                                                                                                                                                                                                                                                                                                                                                                                                                                                                                                                                                                                                                                                                                                                |
| Danmark-Arhundrets orkan    | Vedin, Haldø and Hans Alexandersson, Aarhunderadets storm? Vaader och Vatten, p.18, Dec, 1999<br>Voldberg Henrik, Vredens julemaaned, Vejret, 82, no.1, 1-7, Feb, 2000                                                                                                                                                                                                                                                                                                                                                                                                                                                                                                                                                                                                                                                                                                                                                                                                                                                                                                                                                                                                                                                    |
| Decemberorkanen             | Pelt, S., Kraftige storme med oprindelse i Nordatlanten, Vejret, 137, 44-47, 2013<br>Cappelen J, S Olufsen, MH Ribegaard, JW Nielsen, T Schmith, N Hansen, Det traekker op til orkan, updated 25Jun2018, <a href="https://www.dmi.dk/vejr-og-atmosfare/temaforside-decemberorkanen-1999/det-traekker-op-til-orkan/">https://www.dmi.dk/vejr-og-atmosfare/temaforside-decemberorkanen-1999/det-traekker-op-til-orkan/</a>                                                                                                                                                                                                                                                                                                                                                                                                                                                                                                                                                                                                                                                                                                                                                                                                  |
| Decemberstormen 1999        | Rosenorn, Af Stig, De kraftigste storme i det tyvende aarhundrede in Denmark, Vejret, 82, 15-18, Februar 2000                                                                                                                                                                                                                                                                                                                                                                                                                                                                                                                                                                                                                                                                                                                                                                                                                                                                                                                                                                                                                                                                                                             |
| Denmark storm               | Woetmann Nielsen N and B Hansen Sass, A numerical, high-resolution study of the life cycle of the severe storm over Denmark on 3Dec1999, Tellus, 55A, 338-351, 2003.                                                                                                                                                                                                                                                                                                                                                                                                                                                                                                                                                                                                                                                                                                                                                                                                                                                                                                                                                                                                                                                      |
| Orkanen den 3.december 1999 | Woetmann Nielsen, AN, DMI-HIRLAM's forudsigelse af orkanen den 3.december 1999. Vejret, 82, pp. 19-23, februar 2000.                                                                                                                                                                                                                                                                                                                                                                                                                                                                                                                                                                                                                                                                                                                                                                                                                                                                                                                                                                                                                                                                                                      |
| SR79                        | RWS, Verslag van de Stormvloed can 3 en 4 december 1999 (SR79), Ministerie van VerKeer en Waterstaat, Directoraat-Generaal Rijkswaterstaat, Rijksinstituut voor Kust en Zee, Stormvloedwaarschuwingsdienst, Postbus 20907, 2500EX 's-Gravenhage, 's-Gravenhage, december 1999.                                                                                                                                                                                                                                                                                                                                                                                                                                                                                                                                                                                                                                                                                                                                                                                                                                                                                                                                            |
| Unnamed (hurricane)         | Brugge, Roger, Weather Diary, Dec 1999 <a href="http://www.met.reading.ac.uk/~brugge/diary1999.html#1299">www.met.reading.ac.uk/~brugge/diary1999.html#1299</a><br>Kristeligt Dagblad, Orkan haergedet landet over. Paa vestkysten naede vindstyrken op pa 47 sekundmeter, 4Dec1999 00:00<br>Lloyds Casualty Week, vol318, No12, 17Dec1999<br>Bancroft, George P., Marine Weather Review - North Atlantic Area September through December 1999, Mariners Weather Log, Vol.44, No.1, April 2000. pp.23-38.<br>Sommer A, Wind Resources at Horns Rev, Eltra PSO-2000 Proj nr. EG-05 3248, Tech-wise, 2002.<br>Sommer, A., Offshore measurements of wind and waves at Horns Rev & Laeso, Denmark. European Seminar OWEMES 2003, Apr 10-12, 2003, Naples, Campania, Italy.<br>SMHI_20111013, Hosten 1999 - Arhundradets storm? 13Oct2011<br>( <a href="https://www.smhi.se/kunskapsbanken/meteorologi/hosten-1999-arhundradets-storm-1.5762">https://www.smhi.se/kunskapsbanken/meteorologi/hosten-1999-arhundradets-storm-1.5762</a> )<br>Danish Energy Agency, Security of Electricity Supply in Denmark, 1st edition 2015, translated 2016, Danish Energy Agency, Amaliegade 44, 1256 Copenhagen K, ISBN 978-87-93180-15-4 |

Table SL10. Satellite pictures (arranged by year and then alphabetically)

| Source                                  | Full Reference and Notes                                                                                                                                                                                                                                                                                                                                                                                                                                                              |
|-----------------------------------------|---------------------------------------------------------------------------------------------------------------------------------------------------------------------------------------------------------------------------------------------------------------------------------------------------------------------------------------------------------------------------------------------------------------------------------------------------------------------------------------|
| RWS (1999)                              | RWS, Verslag van de Stormvloed can 3 en 4 december 1999 (SR79), Ministerie van VerKeer en Waterstaat, Directoraat-Generaal Rijkswaterstaat, Rijksinstituut voor Kust en Zee, Stormvloedwaarschuwingsdienst, Postbus 20907, 2500EX 's-Gravenhage, 's-Gravenhage, december 1999.<br>FIG. [SATELLITE] visible? satellite image of storm over NW Europe                                                                                                                                   |
| Aakjaer (2000)                          | Aakjaer AF, Orkanen i Nordsoen den 30. oktober 2000, Vejret, 85, 1-7, 2000<br>-FIG5a.[SATELLITE] Infrared image from American NOAA satellite 3Dec1999 1725MET                                                                                                                                                                                                                                                                                                                         |
| Beredskapsstyrelsen (2000)              | Beredskapsstyrelsen Udviklingsenheden, Den Samlede redningsbredsksabssektors opgavelosning i forbindelse med orkanen d. 3.-4. december og stormen d. 17 december 1999 - En Tvaergaende evaluering og erfaringsopsamling. Februar 2000, Beredskapsstyrelsen, Beredskabsudviklingsenheden, Datavej 16, 3460 Birkerød, Telefon: 4590 6000, Telefax: 4590 6060, E-mail: bue@brs.dk, Internet: www.brs.dk<br>-cover picture is satellite image of storm Anatol from DMI; unknown satellite |
| Forestry Commission (2000)              | Forestry Commission, Naar skoven blaeser omkuld, Vejret, 85, pp.8-9, Dec, 2000<br>-FIG. Satellite picture 3Dec1999 1115. from DMI (Infrared?); Anatol over NW Denmark                                                                                                                                                                                                                                                                                                                 |
| DWD (20020528)                          | DWD, Orkantief 'Anatol' von 3./4. Dezember 1999 (5pp), <a href="https://www.dwd.de/DE/leistungen/besondereereignisse/stuerme/19991204_orkantief_anatol.pdf">https://www.dwd.de/DE/leistungen/besondereereignisse/stuerme/19991204_orkantief_anatol.pdf</a> [pdf document properties: datestamp: 28May2002]<br>-video clips of METEOSAT infrared images covering 2-4Dec1999                                                                                                            |
| Woetmann Nielsen and Hansen Sass (2003) | Woetmann Nielsen N and B Hansen Sass, A numerical, high-resolution study of the life cycle of the severe storm over Denmark on 3Dec1999, Tellus, 55A, 338-351, 2003.<br>-FIG11.NOAA infrared satellite images at (a) 05:36UTC 3Dec, (b) 13:52UTC 3Dec, and (c) 17L49UTC 3Dec. In (c) the dashed curve with arrows indicates the position and flow direction of the low-level jet BBJ.                                                                                                 |
| Astleitner (2019)                       | Astleitner, Thomas, 3. December 1999: Orkantief Anatol fegt ueber de Nordsee, <a href="https://uwr.de/de/a/3-dezember-1999-orkan-tief-anatol-trifft-deutschland">https://uwr.de/de/a/3-dezember-1999-orkan-tief-anatol-trifft-deutschland</a> , published 3Dec2019, accessed 20Sep2020<br>-FIG [MAP] MET IR 03Dec1999 18:00URC FU-Berlin (oppen cell convection pattern)                                                                                                              |
| Capellen (2018)                         | Cappelen, J., Storm og ekstrem vind i Danmark - opgørelser og analyser til og med 2017, DMI rapport 18-07, Copenhagen 2018<br>FIG. [SATELLITE] Friday 03Dec1999 Denmark hit by the most powerful hurricane ever registered. NOAA satellite picture 1749UTC<br>NOTE: band of open cell convective clouds NNW-SSE from Shetland to Dutch coast                                                                                                                                          |
| Capellen (2019)                         | Capellen, John, Orkaner paa vore breddegrader, updated 8Jan2019 <a href="https://www.dmi.dk/vejr-og-atmosfare/temaforside-vind/orkaner-paa-vore-breddegrader/">https://www.dmi.dk/vejr-og-atmosfare/temaforside-vind/orkaner-paa-vore-breddegrader/</a> , (webapage downloaded 12Oct2020)<br>-FIG2. visible satellite image 03Dec1999 1900                                                                                                                                            |
| Wikipedia (20210418)                    | Wikipedia, Orkan Anatol, <a href="https://de.wikipedia.org/wiki/Orkan_Anatol">https://de.wikipedia.org/wiki/Orkan_Anatol</a> , accessed 18Apr2021<br>-FIG: IR satellite picture Anatol taken 03Dec1999 17:25MET                                                                                                                                                                                                                                                                       |

Table SL11. Meteorological maps or surface analysis (arranged by year and then alphabetically)

| Source                                  | Full Reference and Notes                                                                                                                                                                                                                                                                                                                                                                                                                                                                                                                                                                                 |
|-----------------------------------------|----------------------------------------------------------------------------------------------------------------------------------------------------------------------------------------------------------------------------------------------------------------------------------------------------------------------------------------------------------------------------------------------------------------------------------------------------------------------------------------------------------------------------------------------------------------------------------------------------------|
| DMI (19991209)                          | DMI, Rapport. Orkanen over Danmark den 3.-4. december 1999, Danmarks Meteorologiske Institut, Lyngbyvej 100, DK-2100 Kobenhaven 0, 9Dec1999.<br>-FIG1. [MAP] Observations 3Dec1999 1900MET. Low pressure trajectory indicated with times UTC and air pressure at centre. Symbol information in FIG5 and FIG6                                                                                                                                                                                                                                                                                             |
| RWS (1999)                              | RWS, Verslag van de Stormvloed van 3 en 4 december 1999 (SR79), Ministerie van Verkeer en Waterstaat, Directoraat-Generaal Rijkswaterstaat, Rijksinstituut voor Kust en Zee, Stormvloedwaarschuwingsdienst, Postbus 20907, 2500EX 's-Gravenhage, 's-Gravenhage, december 1999.<br>-FIG. [MAP] Surface pressure field on the 4Dec2020 1300MET.<br>Trajectory with minimum pressure marked at 12h intervals                                                                                                                                                                                                |
| UKMO (1999)                             | UKMO, Daily Weather Summary, 26Nov1999 to 05Dec1999                                                                                                                                                                                                                                                                                                                                                                                                                                                                                                                                                      |
| Vedin and Alexandersson (1999)          | Vedin, Haldo and Hans Alexandersson, Aarhunderadets storm? Vaader och Vatten, p.18, Dec, 1999<br>- FIG1. [MAP] Map of lowest surface pressures during passage of low pressure.<br>Arrow shows trajectory of low pressure center with times marked. 10min avg & gusts shown                                                                                                                                                                                                                                                                                                                               |
| Bancroft (2000)                         | Bancroft, George P., Marine Weather Review - North Atlantic Area September through December 1999, Mariners Weather Log, Vol.44, No.1, April 2000. pp.23-38.<br>-FIG10. MPC Atlantic Part 1 surface analysis charts valid 12UTC 02Dec1999 and 03Dec1999;<br>500mb chart (actually 6h computer model forecast) valid 00UTC 03Dec1999<br>or halfway between the valid times of surface analysis charts                                                                                                                                                                                                      |
| Mann and Hansen (2000)                  | Mann AJ, SO Hansen, En storm gor ingen norm, Vejret, no.1. 22.Argang, 82, pp.28-34, Februar 2000.<br>*-FIG1. [MAP] Maximum reduced wind speeds over the southern Denmark 3Dec1999.<br>Wind speeds from Elsam projekt (bold), Riso (normal), DMI (italics)                                                                                                                                                                                                                                                                                                                                                |
| Rosenorn (2000)                         | Rosenorn, Af Stig, De kraftigste storme i det tyvende aarhundrede in Denmark, Vejret, 82, 15-18, Februar 2000<br>-Denmark map showing maximum wind speed and low pressure trajectory                                                                                                                                                                                                                                                                                                                                                                                                                     |
| Voldberg (2000)                         | Voldberg Henrik, Vredens julemaaned, Vejret, 82, no.1, 1-7, Feb, 2000.<br>-FIG1. [MAP] Low pressure center position from 3Dec 0000UTC to 4Dec 0300UTC<br>-FIG2a.[MAP] Average wind and wind gust 3Dec 1500UTC. Flags give wind speed and direction while the number gives the most powerful wind gust over the last 3h.<br>All values in knots<br>-FIG2b.[MAP] Wind measurements on 3Dec 1800UTC. Number for windgusts covers the latest 6h<br>-FIG2c.[MAP] Wind measurements on 3Dec 2100UTC. info same as FIG2a<br>-FIG2d.[MAP] Wind measurements on 4Dec 0000UTC. Number for wind gust covers last 6h |
| Woetman Nielsen (2000)                  | Woetmann Nielsen, AN, DMI-HIRLAM's forudsigelse af orkanen den 3.december 1999. Vejret, 82, pp. 19-23, februar 2000.<br>-FIG2. Synoptic observations of wind, weather, and sea level pressure 17UTC<br>3Dec1999                                                                                                                                                                                                                                                                                                                                                                                          |
| Woetmann Nielsen and Hansen Sass (2003) | Woetmann Nielsen N and B Hansen Sass, A numerical, high-resolution study of the life cycle of the severe storm over Denmark on 3Dec1999, Tellus, 55A, 338-351, 2003.<br>-FIG2. (a) 42h forecast of sea level pressure and wind velocity (WMO standard) at 10m height valid for 1800UTC 3Dec1999.<br>(b) Verifying observations on 1800UTC 3Dec1999 of sea level pressure and 10m wind velocity (WMO standard). Dashed lines are subjectively analyzed isobars at 956, 964, 984hPa.<br>Vertical arrow shows position of Horns Rev                                                                         |
| SMHI (20111013)                         | SMHI_20111013, Hosten 1999 - Arhundradets storm? 13Oct2011<br>( <a href="https://www.smhi.se/kunskapsbanken/meteorologi/hosten-1999-arhundradets-storm-1.5762">https://www.smhi.se/kunskapsbanken/meteorologi/hosten-1999-arhundradets-storm-1.5762</a> )<br>-map of Scania with wind speeds and gusts for selections stations where the 10min avg wind speed is at least 21m/s                                                                                                                                                                                                                          |
| Joyner (2013)                           | Joyner, T.A., Optimizing peak gust and maximum sustained wind speed estimates from mid-latitude wave cyclones, Louisiana State University Doctoral Dissertations, 421, 2013<br>-FIG2-4. Maximum sustained and peak gust wind speed interpolations for the Anatol (a,b), Lothar (c,d), and Martin (e,f) wind storms; all from 1999                                                                                                                                                                                                                                                                        |
| Roberts et al (2014)                    | Roberts JF, AJ Champion, LC Dawkins, KI Hodes, LC Shaffrey, DB Stephenson, MA Stringer, HE Thornton, DB Youngman, The XWS open access catalogue of extreme European windstorms from 1979 to 2012, Nat. Hazards Earth Syst. Sci, 14, 2487-2501, 2014<br>-Map of station measurements of maximum wind speed                                                                                                                                                                                                                                                                                                |
| Capellen (2018)                         | Capellen, J., Storm og ekstrem vind i Danmark - opgorelser og analyser til og med 2017, DMI rapport 18-07, Copenhagen 2018<br>-FIG. [MAP] Highest avg wind during Dec hurricane 1999 based on reanalysis of data from 3-4Dec1999<br>-FIG. [MAP] Highest wind gusts during Dec hurricane 1999 based on reanalysis of data from 3-4Dec1999                                                                                                                                                                                                                                                                 |
| Astleitner (2019)                       | Astleitner, Thomas, 3. December 1999: Orkantief Anatol fegt ueber de Nordsee, <a href="https://uwr.de/de/a/3-dezember-1999-orkan-tief-anatol-trifft-deutschland">https://uwr.de/de/a/3-dezember-1999-orkan-tief-anatol-trifft-deutschland</a> , published 3Dec2019, accessed 20Sep2020<br>-weather map and surface pressure for NW Europe but unknown time                                                                                                                                                                                                                                               |

Table SL12. Model fields (arranged by year and then alphabetically)

| Source     | Full Reference and Notes                                                                                                                                                                                                                                                                                                                                                                                                             |
|------------|--------------------------------------------------------------------------------------------------------------------------------------------------------------------------------------------------------------------------------------------------------------------------------------------------------------------------------------------------------------------------------------------------------------------------------------|
| RWS (1999) | RWS, Verslag van de Stormvloed van 3 en 4 december 1999 (SR79), Ministerie van Verkeer en Waterstaat, Directoraat-Generaal Rijkswaterstaat, Rijksinstituut voor Kust en Zee, Stormvloedwaarschuwingsdienst, Postbus 20907, 2500EX 's-Gravenhage, 's-Gravenhage, december 1999.<br>-FIG. [MAP] Maps of NW Europe showing surface wind and sea level pressure at 03Dec1999: 0600Z, 0900Z, 1200Z, 1500Z, 1800Z, 2100Z, 04Dec1999: 0000Z |



|                                         |                                                                                                                                                                                                                                                                                                                                                                                                                                                                                                                                                                                                                                                                                                                                                                                                                                                                                                                                                                                                                                                                                                                                                                                                                                                                                                                                                                                                                                       |
|-----------------------------------------|---------------------------------------------------------------------------------------------------------------------------------------------------------------------------------------------------------------------------------------------------------------------------------------------------------------------------------------------------------------------------------------------------------------------------------------------------------------------------------------------------------------------------------------------------------------------------------------------------------------------------------------------------------------------------------------------------------------------------------------------------------------------------------------------------------------------------------------------------------------------------------------------------------------------------------------------------------------------------------------------------------------------------------------------------------------------------------------------------------------------------------------------------------------------------------------------------------------------------------------------------------------------------------------------------------------------------------------------------------------------------------------------------------------------------------------|
| Bell et al (2000)                       | Bell GD, MS Halpert, RS Schnell, RW Higgins, J Lawrimore, VE Kousky, R Tinker, W Thlaw, M Chelliah, A Arthusa, Climate Assessment for 1999, Bulletin of the American Meteorological Society, 81, S1-S50, 2000<br>-FIG61. (a) [MAP] mean 300hPa heights and wind speeds during Dec1999                                                                                                                                                                                                                                                                                                                                                                                                                                                                                                                                                                                                                                                                                                                                                                                                                                                                                                                                                                                                                                                                                                                                                 |
| Nielsen and Nielsen (2000)              | Nielsen, Jacob Woge and Nielsen, Mads Hvid, Stormfloden forarsaget af orkanen den 3. december 1999, Vejret, 82, 8-14, Februar 2000<br>-FIG1. [MAP] Hirlam analysis of wind & pressure for 03Dec1999 18:00UTC.<br>Shown in the way that DMI's storm surge model sees it. Only wind over ocean has meaning. The highest wind speeds are about 34-35m/s                                                                                                                                                                                                                                                                                                                                                                                                                                                                                                                                                                                                                                                                                                                                                                                                                                                                                                                                                                                                                                                                                  |
| Woetman Nielsen (2000)                  | Woetmann Nielsen, AN, DMI-HIRLAM's forudsigtelse af orkanen den 3.december 1999. Vejret, 82, pp. 19-23, februar 2000.<br>-FIG1. 17h operational HIRLAM-E prognosis from 00UTC 3Dec1999.<br>The shown fields are sea level pressure (full lines, 2hPa contour) and wind at 10m height (V10m) contour interval 4m/s with smallest contour at 18m/s<br>-FIG3. 17h genkort (see text) HIRLAM-G prognosis from 00UTC 3Dec1999.<br>The shown fields are sea level pressure (stipled, contour interval 2hPa) and 10m wind speed (full contours at 24,26,28,29 m/s)<br>-FIG4. Same as Fig3 but for HIRLAM-E.<br>-FIG5. 17h genkort (see text) HIRLAN-D prognosis from 00UTC 3Dec1999.<br>The shown fields are sea level pressure (stippled, 2hPa contour interval) and V10m (full contours 24,26,28,29,30,31 and 32m/s)<br>-FIG6. 23h HIRLAM-D prognosis from 00UTC 3Dec1999.<br>The shown fields are sea level pressure (stippled, 2hPa intervals) and calculated maximum value of V10m at every grid point in prognosis period from +18 to +23 hour (full contours at 28, 30, 32, 34, 36m/s)<br>-FIG7. as for FIG5, but on a larger DMI-HIRLAM-D area.                                                                                                                                                                                                                                                                                      |
| Ulblich et al (2001)                    | Ulblich U, AH Fink, M Klawa, JG Pinto, Three extreme storms over Europe in December 1999, Weather 56, 70-80, 2001<br>-FIG1. [MAP] ECMWF sea level pressure analysis for (a) Anatol, (b) Lothar, (c) Martin.<br>at the time of the most violent gusts. Contours are every 5mb. Black dots indicate points where max gales within the period exceeded 63 or 80kt. The 6-h positions are also indicated.<br>(d) German Weather Service (DWD) operational manual surface analysis.<br>The location of the fronts is taken from the DWD analysis.<br>-FIG2. [MAP] Large scale conditions associated with the storms:<br>(a), (d), and (g) Anatol;<br>(b), (e), and (h) Lothar;<br>(c), (f), and (i) Martin.<br>The left-hand column shows the 500mb geopotential height (solid lines, contour interval 8dam) and temperature fields (broken lines, contour interval 5degC),<br>the middle column equivalent potential temperature (contour interval 5K) at 850mb,<br>and the right hand column the 3day avg upper level 300-500mb maximum Eady growth rate (per day).<br>Dates and associated cyclone locations (arrows) are indicated along with the cyclone track from 6h positions. Grid points where local values exceed the 85th and 99th percentile shaded<br>-FIG6. [MAP] Fields of maximum Eady growth rate (per day) and equivalent potential temperature (contour interval 5K) at 850mb for three historic European storm events |
| Buizza and Hollingsworth (2001)         | Buizza, Roberto and Anthony Hollingsworth, Severe weather prediction using the ECMWF EPS - The European Storms of December 1999, ECMWF Newsletter, No. 89, Winter 2000/01.<br>-mean sea level pressure field around North Sea and NW Europe for 04Dec1999                                                                                                                                                                                                                                                                                                                                                                                                                                                                                                                                                                                                                                                                                                                                                                                                                                                                                                                                                                                                                                                                                                                                                                             |
| Buizza and Hollingsworth (2002)         | Buizza, Roberto and Anthony Hollingsworth, Storm prediction over Europe using the ECMWF ensemble prediction system, Meteorol. Appl., 9, 2002<br>-mean sea level pressure field around North Sea and NW Europe for 04Dec1999                                                                                                                                                                                                                                                                                                                                                                                                                                                                                                                                                                                                                                                                                                                                                                                                                                                                                                                                                                                                                                                                                                                                                                                                           |
| Munich Re (2002)                        | Munich Re, Winter Storms in Europe (II), Analysis of 1999 losses and loss potentials, Muenchener Rueck, Munich Re Group, 76pp, 2002<br>Kriging grid map of peak gust Anatol                                                                                                                                                                                                                                                                                                                                                                                                                                                                                                                                                                                                                                                                                                                                                                                                                                                                                                                                                                                                                                                                                                                                                                                                                                                           |
| Mueller-Navarra et al (2003)            | Mueller-Navarra SH, W Lang, S Dick, KC Soetje, Ueber de Verfahren der Wasserstands- und Stormflutvorhersage. Hydrodynamisch-numerische Modelle der Nord- und Ostsee und ein empirisch-statistisches Verfahren fuer die Deutsche Bucht, promet. Jahrg. 29, Nr 1-4, 117-124, June 2003<br>FIG6. [MAP] forecast North Sea surge water level for 03Dec1999 22:00 based on a model run with data up to 02Dec1999 22:00.                                                                                                                                                                                                                                                                                                                                                                                                                                                                                                                                                                                                                                                                                                                                                                                                                                                                                                                                                                                                                    |
| Woetmann Nielsen and Hansen Sass (2003) | Woetmann Nielsen N and B Hansen Sass, A numerical, high-resolution study of the life cycle of the severe storm over Denmark on 3Dec1999, Tellus, 55A, 338-351, 2003.<br>-FIG2. (a) 42h forecast of sea level pressure and wind velocity (WMO standard) at 10m height valid for 1800UTC 3Dec1999.<br>-FIG5. [MAP] Relative vorticity at 950hPa, sea level pressure, and 300hPa wind speed.<br>(a) is a 12h forecast valid at 12UTC 2Dec, (b) is a 30h forecast valid 06UTC 3Dec and<br>(c) is a 36h forecast valid 12UTC 3Dec<br>-FIG6. Vertical cross section with distribution of relative humidity RH, theta_e, and V_n normal to section.<br>The thick dashed curve is 1.5PVU contour<br>-FIG7. Potential vorticity at 315K, theta_e at 950hPa.<br>(a) is a 12h forecast valid at 12UTC 2Dec, (b) is a 30h forecast valid 06UTC 3Dec and<br>(c) is a 36h forecast valid 12UTC 3Dec<br>-FIG9. Vertical cross-section with relative humidity RH and wind speed V_n normal to cross section<br>-FIG10. Distribution of theta_e in C at 600hPa. Surface fronts are shown with conventional symbols, the center of the surface low is marked by L and the jet core at 300hPa is shown by thick                                                                                                                                                                                                                                          |

|                           |                                                                                                                                                                                                                                                                                                                                                                                                                                                                                                                                                                                                                                                                                                                                                                                                                |
|---------------------------|----------------------------------------------------------------------------------------------------------------------------------------------------------------------------------------------------------------------------------------------------------------------------------------------------------------------------------------------------------------------------------------------------------------------------------------------------------------------------------------------------------------------------------------------------------------------------------------------------------------------------------------------------------------------------------------------------------------------------------------------------------------------------------------------------------------|
|                           | dashed curve.                                                                                                                                                                                                                                                                                                                                                                                                                                                                                                                                                                                                                                                                                                                                                                                                  |
| Frank and Majewski (2006) | Frank, H, and D Majewski, Hindcasts of historic storms with the DWD models GME, LMQ and LMK using ERA-40 reanalysis, ECMWF Newsletter No. 109, autumn 2006, pp.16-21.<br>-FIG7. Maps of 10m wind speed and sea level pressure at 0000UTC 03Dec1999                                                                                                                                                                                                                                                                                                                                                                                                                                                                                                                                                             |
| Jensen et al (2006)       | Jensen J, C Mudersbach, SH Mueller-Navarra, I Bork, C Koziar, V Renner, Modellgestuetzte Untersuchungen zu Sturmfluten mit sehr geringen Eintrittswahrscheinlichkeiten an der deutschen Nordseekueste, Die Kueste, 71, 123-167, 2006.<br>-modelled storm surge field in German Bight                                                                                                                                                                                                                                                                                                                                                                                                                                                                                                                           |
| Nilsson et al (2007)      | Nilsson C, S Goyette, L Barring, Relating forest damage data to the wind field from high-resolution RCM simulations: case study of Anatol striking Sweden in December 1999, Global and Planetary Change, 57, 161-176, 2007.<br>-FIG2. [MAP] Mean sea level pressure field and 1000hPa wind vectors of 3Dec1999 1800UTC computed from NCEP-NCAR reanalysis. Units are hPa with isobars every 5hPa.<br>Wind speed vectors in m/s. Superimposed on this field is the track of the low pressure system that produced the storm Anatol from 2Dec 1200UTC to 5Dec 1200UTC with P in hPa every 6h.<br>-FIG3. [MAP] Map showing the track of the low pressure centre across southern Sweden on 3-4Dec1999. The lines show the lowest pressure during the passage, and the Ltt show the low pressure centre at time tt. |
| Herrling et al (2010)     | Herrling Gerald, Heiko Knaack, Ralf Kaiser, Hanz D. Niemayer, Evaluation of design water levels at the Ems-Dollard estuary considering the effect of a storm surge barrier, 32nd Conference on Coastal Engineering 2010, Shanghai, China, 30Jun-05Jul2020. ed by JM Smith and P Lynett, pp. 3899-3917, [pdf document properties: title=ICCE2020_Ems_final, datestamp=15Sep2010<br>-FIG5. Comparison of max wind velocities (m/s) and directions in the modelled wind fields of storms (a) Anatol 03Dec1999, (b) Britta 01Nov2006, (c) Tilo 09Nov2007 (DWD)                                                                                                                                                                                                                                                     |
| Gatey (2011)              | Gatey, DA, The analysis of extreme synoptic winds, Ph.D. Thesis, University of Western Ontario, 2011. University of Western Ontario - Electronic Thesis and Dissertation Repository. Paper 268.<br>-FIG5.2. MSLP field Storm Anatol 03Dec1999 18:00h<br>-FIG5.4. Geostrophic wind field: Storm Anatol 03Dec1999 18:00<br>-FIG5.6. Quasi-Geostrophic wind field: Storm Anatol 03Dec1999 18:00<br>-FIG5.8. Semi-Geostrophic wind field: Storm Anatol 03Dec1999 18:00<br>-FIG5.12. Wind field at 1000m: Anatol 3Dec1999 18:00                                                                                                                                                                                                                                                                                     |
| AON Benfield (2013)       | AON Benfield, Historie von 1703 bis 2012: Winterstuerme in Europea, Stand: Januar 2013<br>-FIG_p31. map of max wind gust for Anatol 03Dec1999                                                                                                                                                                                                                                                                                                                                                                                                                                                                                                                                                                                                                                                                  |
| Roberts et al (2014)      | Roberts JF, AJ Champion, LC Dawkins, KI Hodes, LC Shaffrey, DB Stephenson, MA Stringer, HE Thornton, DB Youngman, The XWS open access catalogue of extreme European windstorms from 1979 to 2012, Nat. Hazards Earth Syst. Sci, 14, 2487-2501, 2014<br>-MetUM model of maximum wind speed; model initialized with ERA-Interim<br>-model had problems simulating depth the sea level pressure in Denmark                                                                                                                                                                                                                                                                                                                                                                                                        |
| Cappelen et al (2018)     | Cappelen J, S Olufsen, MH Ribegaard, JW Nielsen, T Schmith, N Hansen, Det traekker op til orkan, updated 25Jun2018, <a href="https://www.dmi.dk/vejr-og-atmosfare/temaforside-decemberorkanen-1999/det-traekker-op-til-orkan/">https://www.dmi.dk/vejr-og-atmosfare/temaforside-decemberorkanen-1999/det-traekker-op-til-orkan/</a><br>FIG. [MAP] average wind speed (and surface atmospheric pressure?) at 15:00 03Dec1999.<br>Average wind speed of storm strength is registered for the first time in W Denmark,<br>NOTE high winds on RHS of low pressure center                                                                                                                                                                                                                                           |
| Cappelen et al (2018e)    | Cappelen J, S Olufsen, MH Ribegaard, JW Nielsen, T Schmith, N Hansen, Orkan passerer, updated 25Jun2018, <a href="https://www.dmi.dk/vejr-og-atmosfare/temaforside-decemberorkanen-1999/orkanen-passerer/">https://www.dmi.dk/vejr-og-atmosfare/temaforside-decemberorkanen-1999/orkanen-passerer/</a><br>-FIG. [MAP] highest avg wind during December hurricane based on reanalysis of data 3-4Dec1999 [Michael Scharling]<br>-FIG. [MAP] highest wind gust during December hurricane based on reanalysis of data 3-4Dec1999 [Michael Scharling]                                                                                                                                                                                                                                                              |

Table SL13. Satellite altimeter strip maps (arranged by year and then alphabetically)

| Source               | Full Reference and Notes                                                                                                                                                                                                                                                                                                                                                          |
|----------------------|-----------------------------------------------------------------------------------------------------------------------------------------------------------------------------------------------------------------------------------------------------------------------------------------------------------------------------------------------------------------------------------|
| Toffoli et al (2005) | A.Toffoli, J.M. Lefevre, E. Bitner-Gregersen, J. Monbaliu, Towards the identification of warning criteria: Analysis of a ship accident database, Applied Ocean Research, 27, 281-291, 2005<br>-there was data extraction for Topex-Poseidon, ERS1, ERS2 for Hs for ship accidents in the period 1995-1999.<br>-Storm Anatol ship accidents not mentioned specifically, but likely |

Table SL14. List meteorological data (arranged by year and then alphabetically)

| Data type                                                                                                | Location                                                      | Time Interval | Full Reference and Notes                                                                                                                                           |
|----------------------------------------------------------------------------------------------------------|---------------------------------------------------------------|---------------|--------------------------------------------------------------------------------------------------------------------------------------------------------------------|
| [TEXT] maximum gust                                                                                      | Prestwick, Humber Bridge, Crosby, Leeds                       | 3Dec1999      | Brugge, Roger, Weather Diary, Dec 1999<br><a href="http://www.met.reading.ac.uk/~brugge/diary1999.html#1299">www.met.reading.ac.uk/~brugge/diary1999.html#1299</a> |
| [FIG] Time series of weather symbols showing wind speed, gust, temperature, humidity, weather conditions | Romo/Juvre, Blaavandshuk, List/Sylt                           | 3-4Dec1999    | DMI, Rapport. Orkanen over Danmark den 3.-4. december 1999, Danmarks Meteorologiske Institut, Lyngbyvej 100, DK-2100 Kobenhaven 0, 9Dec1999.                       |
| [TEXT] maximum gust                                                                                      | Esbjerg                                                       | 3Dec1999      | Kristeligt Dagblad, Orkan haergedet landet over. Paa vestkysten naede vindstyrken op pa 47 sekundmeter, 4Dec1999 00:00                                             |
| [TABLE] maximum 10 min wind speed and gust of month                                                      | Shannon, Kilkenny, Connaught airport, Clones, Birr, Mullingar | 3Dec1999      | Met Eireann, Monthly Weather Bulletin, no. 164, Dec, 1999                                                                                                          |
| [FIG] Time series wind                                                                                   | Eurolplatform, Hoek van                                       | 3-4 Dec 1999  | RWS, Verslag van de Stormvloed can 3 en 4 december 1999                                                                                                            |

|                                                                                                       |                                                                                                                                                                                                                  |                        |                                                                                                                                                                                                                                                                                                            |
|-------------------------------------------------------------------------------------------------------|------------------------------------------------------------------------------------------------------------------------------------------------------------------------------------------------------------------|------------------------|------------------------------------------------------------------------------------------------------------------------------------------------------------------------------------------------------------------------------------------------------------------------------------------------------------|
| speed and direction                                                                                   | Holland, IJmuiden, platform K13a                                                                                                                                                                                 |                        | (SR79), Ministerie van Verkeer en Waterstaat, Directoraat-Generaal Rijkswaterstaat, Rijksinstituut voor Kust en Zee, Stormvloedwaarschuwingsdienst, Postbus 20907, 2500EX 's-Gravenhage, 's-Gravenhage, december 1999.                                                                                     |
| [TEXT] Single ship report from Walter Hertwig 3                                                       | North Sea ship report 55N 2E                                                                                                                                                                                     | 3Dec1999               | Bancroft, George P., Marine Weather Review - North Atlantic Area September through December 1999, Mariners Weather Log, Vol.44, No.1, April 2000. pp.23-38.                                                                                                                                                |
| [TABLE] maximum 10 minute wind speeds from original measurements and reduced to 10m height with times | Horns Rev, Tobol, Omo, Rodsand, Gedser Rev, Gedser Odde, Vindeby, Middelgrundten, Riso, Tystofte, Borglum, Skjern, Kegnaes, Bastrup, Beldringe, Tystofte, Abed, Gedser Odde, Sjaelsmark, Kastrup, Klemensker Ost | 3 Dec 1999             | Mann AJ, SO Hansen, En storm gor ingen norm, Vejret, no1. 22.Argang, 82, pp.28-34, Februar 2000.                                                                                                                                                                                                           |
| [FIGURE] Time series air pressure, 5s avg gust, and 10min sustained wind speed                        | Horns Rev 62m mast                                                                                                                                                                                               | 3Dec1999               | Neckelmann, S. and J. Petersen, Evaluation of the stand-alone wind and wave measurement systems for Horns Rev 150MW offshore wind farm in Denmark, OWEMES 2000, ATENA, Rome, Sicily, pp.17-27, 2000                                                                                                        |
| [TABLE] maximum wind speed at 4 measurement heights                                                   | Horns Rev 62m mast                                                                                                                                                                                               | 3 Dec 1999             | Neckelmann, S. and J. Petersen, Evaluation of the stand-alone wind and wave measurement systems for Horns Rev 150MW offshore wind farm in Denmark, OWEMES 2000, ATENA, Rome, Sicily, pp.17-27, 2000                                                                                                        |
| [MAP] map labelled with maximum sustained wind speeds                                                 | Denmark stations                                                                                                                                                                                                 | 3-4 Dec 1999           | Rosenorn, Af Stig, De kraftigste storme i det tyvende aarhundrede in Denmark, Vejret, 82, 15-18, Februar 2000                                                                                                                                                                                              |
| [MAP] map with wind flags                                                                             | Denmark, northernmost Germany, south Sweden                                                                                                                                                                      | 3Dec1999<br>1500 UTC   | Voldberg Henrik, Vredens julemaanend, Vejret, 82, no.1, 1-7, Feb, 2000.                                                                                                                                                                                                                                    |
| [MAP] map with wind flags                                                                             | Denmark, northernmost Germany, south Sweden                                                                                                                                                                      | 3Dec1999<br>1800 UTC   | Voldberg Henrik, Vredens julemaanend, Vejret, 82, no.1, 1-7, Feb, 2000.                                                                                                                                                                                                                                    |
| [MAP] map with wind flags                                                                             | Denmark, northernmost Germany, south Sweden                                                                                                                                                                      | 3Dec1999<br>2100 UTC   | Voldberg Henrik, Vredens julemaanend, Vejret, 82, no.1, 1-7, Feb, 2000.                                                                                                                                                                                                                                    |
| [MAP] map with wind flags                                                                             | Denmark, northernmost Germany, south Sweden                                                                                                                                                                      | 4Dec1999<br>0000 UTC   | Voldberg Henrik, Vredens julemaanend, Vejret, 82, no.1, 1-7, Feb, 2000.                                                                                                                                                                                                                                    |
| [MAP] synoptic map with wind, weather, surface pressure printed                                       | Denmark, southernmost Sweden, northernmost Germany                                                                                                                                                               | 3 Dec 1999<br>1700 MET | Woetmann Nielsen, AN, DMI-HIRLAM's forudsigtelse af orkanen den 3.december 1999. Vejret, 82, pp. 19-23, februar 2000.                                                                                                                                                                                      |
| [TABLE] maximum gust                                                                                  | Sylt (WMO 10020), Kap Arkona (WMO 10091), Hel (WMO 12135)                                                                                                                                                        | 3-4Dec1999             | Ulblich U, AH Fink, M Klawa, JG Pinto, Three extreme storms over Europe in December 1999, Weather 56, 70-80, 2001                                                                                                                                                                                          |
| [TEXT] maximum gust                                                                                   | North Sea platform, Romo, Sylt, Fehmarn, Kap Arkon Rugen, Bornholm, Hela Peninsula, Gdansk (Danzig), Kaliningrad (Konigsburg)                                                                                    | 3-4Dec1999             | DWD, Orkantief 'Anatol' von 3./4. Dezember 1999 (5pp), <a href="https://www.dwd.de/DE/leistungen/besondereereignisse/stuerme/19991204_orkantief_anatol.pdf">https://www.dwd.de/DE/leistungen/besondereereignisse/stuerme/19991204_orkantief_anatol.pdf</a> [pdf document properties: timestamp: 28May2002] |
| [FIGURE] Time series annual maximum gust                                                              | List auf Sylt                                                                                                                                                                                                    | 3-4Dec1999             | DWD, Orkantief 'Anatol' von 3./4. Dezember 1999 (5pp), <a href="https://www.dwd.de/DE/leistungen/besondereereignisse/stuerme/19991204_orkantief_anatol.pdf">https://www.dwd.de/DE/leistungen/besondereereignisse/stuerme/19991204_orkantief_anatol.pdf</a> [pdf document properties: timestamp: 28May2002] |
| [FIGURE] Time series sea level pressure                                                               | List auf Sylt, Torup Sweden                                                                                                                                                                                      | 3-4Dec1999             | DWD, Orkantief 'Anatol' von 3./4. Dezember 1999 (5pp), <a href="https://www.dwd.de/DE/leistungen/besondereereignisse/stuerme/19991204_orkantief_anatol.pdf">https://www.dwd.de/DE/leistungen/besondereereignisse/stuerme/19991204_orkantief_anatol.pdf</a> [pdf document properties: timestamp: 28May2002] |
| [FIGURE] Time series 10 minute average wind speed                                                     | Unnamed North Sea platform 55.5N 5.00E                                                                                                                                                                           | 3-4Dec1999             | DWD, Orkantief 'Anatol' von 3./4. Dezember 1999 (5pp), <a href="https://www.dwd.de/DE/leistungen/besondereereignisse/stuerme/19991204_orkantief_anatol.pdf">https://www.dwd.de/DE/leistungen/besondereereignisse/stuerme/19991204_orkantief_anatol.pdf</a> [pdf document properties: timestamp: 28May2002] |
| [FIGURE] Time series of gust and 10min average wind speed                                             | List auf Sylt, Westermarkelsdorf                                                                                                                                                                                 | 3-4Dec1999             | DWD, Orkantief 'Anatol' von 3./4. Dezember 1999 (5pp), <a href="https://www.dwd.de/DE/leistungen/besondereereignisse/stuerme/19991204_orkantief_anatol.pdf">https://www.dwd.de/DE/leistungen/besondereereignisse/stuerme/19991204_orkantief_anatol.pdf</a> [pdf document properties: timestamp: 28May2002] |
| [TABLE] maximum wind speed of radiosonde profile                                                      | Radiosonde stations in central and western Europe                                                                                                                                                                | 3-4Dec1999             | DWD, Klimatologische Bewertung der juensten Stark-Windereignisse (Anatol und Lothar) aus der Sicht der Klimatologie der freien Atmosphaere, [pdf document properties: 28/05/2002]                                                                                                                          |
| [TABLE] maximum wind speeds                                                                           | Romo, Copenhagen, Sylt, Cape Arcona (Ruegen)                                                                                                                                                                     | 3-4Dec1999             | Munich Re, Winter Storms in Europe (II), Analysis of 1999 losses and loss potentials, Muenchener Rueck, Munich Re Group, 76pp, 2002                                                                                                                                                                        |
| [FIG] Time series of the wind speed (10min, 5s, 1s) and air pressure at 62m                           | Horns Rev                                                                                                                                                                                                        | 3-4Dec1999             | Sommer A, Wind Resources at Horns Rev, Eltra PSO-2000 Proj nr. EG-05 3248, Tech-wise, 2002.                                                                                                                                                                                                                |
| [TEXT] maximum 1s gust at 62m height 58.5m/s                                                          | Horns Rev M2 Mast                                                                                                                                                                                                | 3Dec1999<br>18:00MET?  | Sommer, A., Offshore measurements of wind and waves at Horns Rev & Laeso, Denmark. European Seminar OWEMES                                                                                                                                                                                                 |

|                                                                        |                                            |                         |                                                                                                                                                                                                                                                                                                       |
|------------------------------------------------------------------------|--------------------------------------------|-------------------------|-------------------------------------------------------------------------------------------------------------------------------------------------------------------------------------------------------------------------------------------------------------------------------------------------------|
|                                                                        |                                            |                         | 2003, Apr 10-12, 2003, Naples, Campania, Italy.                                                                                                                                                                                                                                                       |
| [FIGURE] time series of Horns Rev wind speed at 30m (height corrected) | Horns Rev mast                             | 3 Dec 1999 0600-2330UTC | Woetmann Nielsen N and B Hansen Sass, A numerical, high-resolution study of the life cycle of the severe storm over Denmark on 3Dec1999, Tellus, 55A, 338-351, 2003.                                                                                                                                  |
| [TABLE] Maximum wind speed                                             | Norderney                                  | 03Dec1999               | Frank, H, and D Majewski, Hindcasts of historic storms with the DWD models GME, LMQ and LMK using ERA-40 reanalysis, ECMWF Newsletter No. 109, autumn 2006, pp.16-21.                                                                                                                                 |
| [TABLE] highest wind gust in Germany during storm                      | List/Sylt                                  | 3-4Dec1999              | Gerhard Mueller-Westermeier, Beschreibung un klimatologische Bewertung des Orkantiefs "Kyrill", pdf properties: Title: Deutscher Wetterdienst - Nationale Klimauberwachung, Author: Gerhard Mueller-Westermeier, Subjet: Orkan Kyrill, datestamp: 26Jan2007                                           |
| [FIGURE] time series of gust wind speed                                | Malmo, Horby, Skillinge, Helsingborg, Hano | 3-4Dec1999              | Nilsson C, S Goyette, L Barring, Relating forest damage data to the wind field from high-resolution RCM simulations: case study of Anatol striking Sweden in December 1999, Global and Planetary Change, 57, 161-176, 2007.                                                                           |
| [FIGURE] Map with text for 10 min average wind speed and gust          | 8 stations in southern Sweden              | 3-4Dec1999              | SMHI_20111013, Hosten 1999 - Arhundredets storm? 13Oct2011 ( <a href="https://www.smhi.se/kunskapsbanken/meteorologi/hosten-1999-arhundredets-storm-1.5762">https://www.smhi.se/kunskapsbanken/meteorologi/hosten-1999-arhundredets-storm-1.5762</a> )                                                |
| [TEXT] 10 minute average wind speed                                    | Hano, Falsterbo                            | 3-4Dec1999              | SMHI_20111013, Hosten 1999 - Arhundredets storm? 13Oct2011 ( <a href="https://www.smhi.se/kunskapsbanken/meteorologi/hosten-1999-arhundredets-storm-1.5762">https://www.smhi.se/kunskapsbanken/meteorologi/hosten-1999-arhundredets-storm-1.5762</a> )                                                |
| [TEXT] maximum wind gusts                                              | Fehmarn, Hiddensee, Mecklenburg-Vorpommern | 3Dec1999                | AON Benfield, Historie von 1703 bis 2012: Winterstuerme in Europea, Stand: Januar 2013                                                                                                                                                                                                                |
| [TEXT] maximum wind and gust                                           | Romo                                       | 3Dec1999                | Cappelen J, S Olufsen, MH Ribergaard, JW Nielsen, T Schmith, N Hansen, Orkan passerer, updated 25Jun2018, <a href="https://www.dmi.dk/vej-og-atmosfare/temaforside-decemberorkanen-1999/orkanen-passerer/">https://www.dmi.dk/vej-og-atmosfare/temaforside-decemberorkanen-1999/orkanen-passerer/</a> |
| [TEXT] Lowest measured air pressure                                    | Anholt                                     | 3Dec1999                | Cappelen J, S Olufsen, MH Ribergaard, JW Nielsen, T Schmith, N Hansen, Orkan passerer, updated 25Jun2018, <a href="https://www.dmi.dk/vej-og-atmosfare/temaforside-decemberorkanen-1999/orkanen-passerer/">https://www.dmi.dk/vej-og-atmosfare/temaforside-decemberorkanen-1999/orkanen-passerer/</a> |
| [TEXT] Maximum average wind and gust                                   | Sylt                                       | 3Dec1999                | Astleitner, Thomas, 3. December 1999: Orkantief Anatol feget ueber de Nordsee, <a href="https://uwr.de/de/a/3-dezember-1999-orkan-tief-anatol-trifft-deutschland">https://uwr.de/de/a/3-dezember-1999-orkan-tief-anatol-trifft-deutschland</a> , published 3Dec2019, accessed 20Sep2020               |

Table SL15. Significant wave height and sea state (arranged by year and then alphabetically)

| Data type                                                            | Location                                                  | Time Interval | Full Reference and Notes                                                                                                                                                                                                                                                       |
|----------------------------------------------------------------------|-----------------------------------------------------------|---------------|--------------------------------------------------------------------------------------------------------------------------------------------------------------------------------------------------------------------------------------------------------------------------------|
| [FIG] Time series of wave height                                     | Europlatform, IJmuiden, K13a, Eierlandse Gat              | 3-4 Dec 1999  | RWS, Verslag van de Stormvloed can 3 en 4 december 1999 (SR79), Ministerie van Verkeer en Waterstaat, Directoraat-Generaal Rijkswaterstaat, Rijksinstituut voor Kust en Zee, Stormvloedwaarschuwingsdienst, Postbus 20907, 2500EX 's-Gravenhage, 's-Gravenhage, december 1999. |
| [TABLE] maximum wave height and maximum significant wave height      | Horns Rev, 2 waverider locations north and south of shoal | 3Dec1999      | Neckelmann, S. and J. Petersen, Evaluation of the stand-alone wind and wave measurement systems for Horns Rev 150MW offshore wind farm in Denmark, OWEMES 2000, ATENA, Rome, Sicily, pp.17-27, 2000                                                                            |
| [FIG] Time series of significant wave height and maximum wave height | Horns Rev, waverider buoys, north and south               | 3-4Dec1999    | Sommer A, Wind Resources at Horns Rev, Eltra PSO-2000 Proj nr. EG-05 3248, Tech-wise, 2002.                                                                                                                                                                                    |
| [TABLE] maximum wave height and maximum significant wave height      | Horns Rev, 2 waverider locations north and south of shoal | 3Dec1999      | Sommer, A., Offshore measurements of wind and waves at Horns Rev & Laeso, Denmark. European Seminar OWEMES 2003, Apr 10-12, 2003, Naples, Campania, Italy.                                                                                                                     |

Table SL16. Wave period and other wave data (arranged by year and then alphabetically)

| Data type                           | Location                                     | Time Interval | Full Reference and Notes                                                                                                                                                                                                                                                       |
|-------------------------------------|----------------------------------------------|---------------|--------------------------------------------------------------------------------------------------------------------------------------------------------------------------------------------------------------------------------------------------------------------------------|
| [FIG] Time series of wave direction | Europlatform, IJmuiden, K13a, Eierlandse Gat | 3-4 Dec 1999  | RWS, Verslag van de Stormvloed can 3 en 4 december 1999 (SR79), Ministerie van Verkeer en Waterstaat, Directoraat-Generaal Rijkswaterstaat, Rijksinstituut voor Kust en Zee, Stormvloedwaarschuwingsdienst, Postbus 20907, 2500EX 's-Gravenhage, 's-Gravenhage, december 1999. |

Table SL17. Surge reports and quantitative water levels (arranged by year and then alphabetically)

| Data type                    | Location                         | Time Interval        | Full Reference and Notes                                                                                     |
|------------------------------|----------------------------------|----------------------|--------------------------------------------------------------------------------------------------------------|
| [TABLE] Maximum water levels | Esbjerg, Vidaa(Hojer), Torsminde | 3 Dec 1999 afternoon | DMI, Rapport. Orkanen over Danmark den 3.-4. december 1999, Denmarks Meteorologiske Institut, Lyngbyvej 100, |

|                                                                                                                                                                                                                          |                                                                                                                                                               |                      |                                                                                                                                                                                                                                                                                                            |
|--------------------------------------------------------------------------------------------------------------------------------------------------------------------------------------------------------------------------|---------------------------------------------------------------------------------------------------------------------------------------------------------------|----------------------|------------------------------------------------------------------------------------------------------------------------------------------------------------------------------------------------------------------------------------------------------------------------------------------------------------|
|                                                                                                                                                                                                                          |                                                                                                                                                               |                      | DK-2100 Kobenhaven 0, 9Dec1999.                                                                                                                                                                                                                                                                            |
| [TEXT] skew surge statement that water level 3.2m over normal                                                                                                                                                            | Esbjerg                                                                                                                                                       | 3 Dec 1999 afternoon | Kristeligt Dagblad, Orkan haergede landet over. Paa vestkysten naede vindstyrken op pa 47 sekundmeter, 4Dec1999 00:00                                                                                                                                                                                      |
| [TABLE] Highest water levels and skew surge references to mean high tide (1986-1995)                                                                                                                                     | Stations in Schleswig-Holstein and Niedersachsen                                                                                                              | 3-4 Dec 1999         | Land Schleswig-Holstein, Sturmflutereignis am 03.12.1999 (Wasserstaende an Pegelmessstellen), Amt fuer laendliche Raeume, Husum, Az.: 5621, document sent by Maria Bluemel 09Sep2020                                                                                                                       |
| [TEXT] maximum water level 5.86m                                                                                                                                                                                         | Hamburg                                                                                                                                                       | 3 Dec 1999 23:15?    | Lloyds Casualty Week, vol318, No12, 17Dec1999                                                                                                                                                                                                                                                              |
| [TEXT] maximum skew surge 4.10m                                                                                                                                                                                          | Esbjerg                                                                                                                                                       | 3-4 Dec 1999         | Lloyds Casualty Week, vol318, No12, 17Dec1999                                                                                                                                                                                                                                                              |
| [TABLE] Maximum values of water level, true surge, and skew surge with times                                                                                                                                             | Delfzijl, Vlissingen, Roompot buiten, Hoek van Holland, Dordrecht, Den Helder, Harlingen                                                                      | 3-4 Dec 1999         | RWS, Verslag van de Stormvloed can 3 en 4 december 1999 (SR79), Ministerie van Verkeer en Waterstaat, Directoraat-Generaal Rijkswaterstaat, Rijksinstituut voor Kust en Zee, Stormvloedwaarschuwingsdienst, Postbus 20907, 2500EX 's-Gravenhage, 's-Gravenhage, december 1999.                             |
| [FIG] Time series of measured water level, model astronomical tide, surge residual                                                                                                                                       | Delfzijl, Vlissingen, Roompot buiten, Hoek van Holland, Dordrecht, Den Helder, Harlingen                                                                      | 3-4 Dec 1999         | RWS, Verslag van de Stormvloed can 3 en 4 december 1999 (SR79), Ministerie van Verkeer en Waterstaat, Directoraat-Generaal Rijkswaterstaat, Rijksinstituut voor Kust en Zee, Stormvloedwaarschuwingsdienst, Postbus 20907, 2500EX 's-Gravenhage, 's-Gravenhage, december 1999.                             |
| [TABLE] maximum water level across storm period 2.80 m but with power outage?                                                                                                                                            | Horns Rev Mast                                                                                                                                                | (3 Dec 1999)         | Neckelmann, S. and J. Petersen, Evaluation of the stand-alone wind and wave measurement systems for Horns Rev 150MW offshore wind farm in Denmark, OWEMES 2000, ATENA, Rome, Sicily, pp.17-27, 2000                                                                                                        |
| [TABLE] maximum water level, astronomical tides, maximum residual                                                                                                                                                        | Thyboron, Ferring, Tosminde, Hvide Sande, Esbjerg, Ribe, Havneby, Ballum, Vidaa/Hojer                                                                         | 3-4 Dec 1999         | Nielsen, Jacob Woge and Nielsen, Mads Hvid, Stormfloden foraarsaget af orkanen den 3. december 1999, Vejret, 82, 8-14, Februar 2000                                                                                                                                                                        |
| [TEXT] Maximum surge 5.82m                                                                                                                                                                                               | Hamburg                                                                                                                                                       | 3 Dec 1999 23:15MEZ  | DWD, Orkantief 'Anatol' von 3./4. Dezember 1999 (5pp), <a href="https://www.dwd.de/DE/leistungen/besondereereignisse/stuerme/19991204_orkantief_anatol.pdf">https://www.dwd.de/DE/leistungen/besondereereignisse/stuerme/19991204_orkantief_anatol.pdf</a> [pdf document properties: datestamp: 28May2002] |
| [TEXT] Maximum surge water level at 5.86m                                                                                                                                                                                | Hamburg                                                                                                                                                       | 3 Dec 1999           | Munich Re, Winter Storms in Europe (II), Analysis of 1999 losses and loss potentials, Muenchener Rueck, Munich Re Group, 76pp, 2002                                                                                                                                                                        |
| [FIG] Time series of water level from ADCP? showing maximum of 2.75 m                                                                                                                                                    | Horns Rev                                                                                                                                                     | 3-4Dec1999           | Sommer A, Wind Resources at Horns Rev, Eltra PSO-2000 Proj nr. EG-05 3248, Tech-wise, 2002.                                                                                                                                                                                                                |
| [TABLE] MHW for 1999, astronomical departure from MHW, surge residual, departure from MHW, max water level for PN reference, time of maximum water level, PN reference level, maximum water level for NN reference level | Helgoland, Borkum, Emden, Wilhelmshaven, Alte Weser, Bremerhaven, Bremen, Grosser Vogelsand, Cuxhaven, Hamburg, Buesum, Bildesperrwerk, Husum, Ribe, Esbjerg. | 3 Dec 1999           | Mueller-Navarra SH, W Lang, S Dick, KC Soetje, Ueber de Verfahren der Wasserstands- und Sturmflutvorhersage. Hydrodynamisch-numerische Modelle der Nord- und Ostsee und ein empirisch-statistisches Verfahren fuer die Deutsche Bucht, promet. Jahrg. 29, Nr 1-4, 117-124, June 2003                       |
| [TABLE] Maximum water level 2.80m; expected high tide about 0.49m                                                                                                                                                        | Horns Rev                                                                                                                                                     | 3 Dec 1999           | Sommer, A., Offshore measurements of wind and waves at Horns Rev & Laeso, Denmark. European Seminar OWEMES 2003, Apr 10-12, 2003, Naples, Campania, Italy.                                                                                                                                                 |
| [TABLE] Maximum water levels relative normal null                                                                                                                                                                        | Borkum, Emden, Norderney, Helgoland, Wilhelmshaven, Bremerhaven, Bremen, Cuxhaven, Hamburg, Buesum, Husum, Dagebuell, Wittduen, List                          | 3Dec1999             | Mueller-Navarra, Sylvin, Sturmfluten. Land under an Nord- und Ostsee, in: Entfesselte Elemente-Der Mensch und die Kraefte der Natur, 5, 92-99, Guetersloh. Wissen-Media-Verl., 2005                                                                                                                        |
| [TABLE] Measured highest water levels                                                                                                                                                                                    | Borkum, Emden, Norderney, Helgoland, Wilhelmshaven, Bremerhaven, Cuxhaven, Buesum, Husum, Dagebuell, Wittduen, List, Esbjerg                                  | 3-4Dec1999           | Jensen J, C Mudersbach, SH Mueller-Navarra, I Bork, C Koziar, V Renner, Modellgestuetzte Untersuchungen zu Sturmfluten mit sehr geringen Eintrittswahrscheinlichkeiten an der deutschen Nordseekueste, Die Kueste, 71, 123-167, 2006.                                                                      |
| [FIG] Measured water level, astronomical tide, surge residual                                                                                                                                                            | Cuxhaven                                                                                                                                                      | 3-4Dec1999           | Goennert, Gabriele & Thomas Buss, Sturmfluten zur Bemessung von Hochwasserschutzanlagen, Berichte des Landesbetriebes Strassen, Bruecken und Gewaesser Nr.2/2009, Freie und Hansestadt Hamburg, Landesbetrieb Strassen, Bruecken und Gewaesser, Hamburg ISSN 1867-7959.                                    |
| [FIG] Measured highest water levels during Anatol                                                                                                                                                                        | Brokum, Eemshaven, Eemshoern, Delfzijl Knock, Emden, Pogum barrier                                                                                            | 3-4 Dec 1999         | Herrling Gerald, Heiko Knaack, Ralf Kaiser, Hanz D. Niemayer, Evaluation of design water levels at the Ems-Dollard estuary considering the effect of a storm surge barrier,                                                                                                                                |

|                                                                              |                                                                                                   |              |                                                                                                                                                                                                                                                                                                                                                               |
|------------------------------------------------------------------------------|---------------------------------------------------------------------------------------------------|--------------|---------------------------------------------------------------------------------------------------------------------------------------------------------------------------------------------------------------------------------------------------------------------------------------------------------------------------------------------------------------|
|                                                                              |                                                                                                   |              | 32nd Conference on Coastal Engineering 2010, Shanghai, China, 30Jun-05Jul2020. ed by JM Smith and P Lynett, pp. 3899-3917, [pdf document properties: title=ICCE2020_Ems_final, datestamp=15Sep2010]                                                                                                                                                           |
| [TEXT] Maximum water level 3.43 m ODN?, skew surge 0.96 m, true surge 1.39 m | Southend on Sea, UK                                                                               | 3 Dec 1999   | Environment Agency, Thames Barrier Project Pack 2012, time stamp Nov. 24, 2011<br>Environment Agency, Thames Barrier Project Pack, January, 2018                                                                                                                                                                                                              |
| [TEXT] Maximum water level                                                   | Hamburg                                                                                           | 3 Dec 1999   | AON Benfield, Historie von 1703 bis 2012: Winterstuerme in Europea, Stand: Januar 2013                                                                                                                                                                                                                                                                        |
| [TEXT] Highest water levels                                                  | Ribe                                                                                              | 3 Dec 1999   | Danhostel-Ribe, Sturmfluten, <a href="https://web.archive.org/web/20131215125955/http://www.danhostel-ribe.dk/de/sturmfluten">https://web.archive.org/web/20131215125955/http://www.danhostel-ribe.dk/de/sturmfluten</a> , accessed 25Apr2021                                                                                                                 |
| [FIG, TEXT] maximum measured water levels                                    | Hamburg, Harburg                                                                                  | 3 Dec 1999   | Ge J, D Much, J Kappenberg, O Nino, P Ding, Z Chen, Simulating storm flooding maps over Hafencity under present and sea level rise scenarios, Journal of Flood Risk Management, 7, 319-331, 2014.                                                                                                                                                             |
| [TABLE] 'wind surge' 201cm                                                   | Norderney                                                                                         | 1999         | Kristandt, J, B Brecht, H Frank, H Knaack, Optimization of empirical storm surge forecast – modelling of high resolution wind fields, Die Kuste, 18, 301-308, 2014                                                                                                                                                                                            |
| [FIGURE] Highest water levels labelled on map                                | Hanstholm, Thyboron, Ferring, Thorsminde, Hvide Sand, Esbjerg, Ribe, Havneby, Ballum, Vidaa/Hojer | 3 Dec 1999   | Cappelen, J., Storm og ekstrem vind i Danmark - opgorelser og analyser til og med 2017, DMI rapport 18-07, Copenhagen 2018                                                                                                                                                                                                                                    |
| [FIGURE] Highest water levels labelled on map                                | Hanstholm, Thyboron, Ferring, Thorsminde, Hvide Sand, Esbjerg, Ribe, Havneby, Ballum, Vidaa/Hojer | 3 Dec 1999   | Cappelen J, S Olufsen, MH Ribergaard, JW Nielsen, T Schmith, N Hansen, Stormfloden under decemberorkanen, updated 25Jun2018b, <a href="https://www.dmi.dk/vejr-og-atmosfare/temaforside-decemberorkanen-1999/stormfloden-under-decemberorkanen/">https://www.dmi.dk/vejr-og-atmosfare/temaforside-decemberorkanen-1999/stormfloden-under-decemberorkanen/</a> |
| [TABLE] Detrended highest measured water level                               | ~20 stations on Danish west coast and Kattegat                                                    | 3-4 Dec 1999 | Ditlevsen C, MM Ramos, C Sorensen, UR Ciocan, T Pionkowitz, Hojvandsstatistikker 2017, Miljo- og Foedevareministeriet, Kystdirektoratet Lemvig, Februar, 2018                                                                                                                                                                                                 |
| [TEXT] Maximum water level before instrument malfunction                     | Ribe                                                                                              | 3 Dec 1999   | Capellen, John, Orkaner paa vore breddegrader, updated 8Jan2019 <a href="https://www.dmi.dk/vejr-og-atmosfare/temaforside-vind/orkaner-paa-vore-breddegrader/">https://www.dmi.dk/vejr-og-atmosfare/temaforside-vind/orkaner-paa-vore-breddegrader/</a> , (webapage downloaded 12Oct2020)                                                                     |
| [TEXT] Maximum water level                                                   | Ribe, Hamburg                                                                                     | 3 Dec 1999   | Wikipedia, Orkan Anatol, <a href="https://de.wikipedia.org/wiki/Orkan_Anatol">https://de.wikipedia.org/wiki/Orkan_Anatol</a> , accessed 18Apr2021                                                                                                                                                                                                             |

Table SL18. Water current information (arranged by year and then alphabetically)

| Data type                                                                                           | Location                | Time Interval | Full Reference and Notes                                                                                                           |
|-----------------------------------------------------------------------------------------------------|-------------------------|---------------|------------------------------------------------------------------------------------------------------------------------------------|
| [FIG] Time series of water current speed at Baltic Sea outflow                                      | Vestbroen i Storesbaelt | 4 Dec 1999    | Nielsen, Jacob Woge and Nielsen, Mads Hvid, Stormfloden forarsaget af orkanen den 3. december 1999, Vejret, 82, 8-14, Februar 2000 |
| [FIG] Time series of water current at 3 levels showing maximum value 0.98m/s on afternoon 04Dec1999 | Horns Rev               | 3-4Dec1999    | Sommer A, Wind Resources at Horns Rev, Eltra PSO-2000 Proj nr. EG-05 3248, Tech-wise, 2002.                                        |

Table SL19. Return period of water level; ranking of water level

| Source                     | Full Reference and Notes                                                                                                                                                                                                                                                                                                                                                                                                            |
|----------------------------|-------------------------------------------------------------------------------------------------------------------------------------------------------------------------------------------------------------------------------------------------------------------------------------------------------------------------------------------------------------------------------------------------------------------------------------|
| RWS (1999)                 | RWS, Verslag van de Stormvloed can 3 en 4 december 1999 (SR79), Ministerie van VerKeer en Waterstaat, Directoraat-Generaal Rijkswaterstaat, Rijksinstituut voor Kust en Zee, Stormvloedwaarschuwingsdienst, Postbus 20907, 2500EX 's-Gravenhage, 's-Gravenhage, december 1999.<br>-water levels expressed as return period frequencies for Delfzijl, Vlissingen, Roompot buiten, Hoek van Holland, Dordrecht, Den Helder, Harlingen |
| Nielsen and Nielsen (2000) | Nielsen, Jacob Woge and Nielsen, Mads Hvid, Stormfloden forarsaget af orkanen den 3. december 1999, Vejret, 82, 8-14, Februar 2000<br>-Thyboron: 2y<br>-Torsminde: 3y<br>-Hvide Sand: 9y<br>-Esbjerg: 50y (rank 4 after 1981 storm)<br>-Ribe: >196y<br>-Havneby: 5y<br>-Ballum: 25y<br>-Vidaa/Hojer: 43y                                                                                                                            |
| DWD (20020528)             | DWD, Orkantief 'Anatol' von 3./4. Dezember 1999 (5pp), <a href="https://www.dwd.de/DE/leistungen/besondereereignisse/stuerme/19991204_orkantief_anatol.pdf">https://www.dwd.de/DE/leistungen/besondereereignisse/stuerme/19991204_orkantief_anatol.pdf</a> [pdf document properties: datestamp: 28May2002]<br>-rank 4 storm surge water level Hamburg                                                                               |
| Munich Re (2002)           | Munich Re, Winter Storms in Europe (II), Analysis of 1999 losses and loss potentials, Muenchener Rueck, Munich Re Group, 76pp, 2002                                                                                                                                                                                                                                                                                                 |

|                         |                                                                                                                                                                                                                                                                                                                                                                                          |
|-------------------------|------------------------------------------------------------------------------------------------------------------------------------------------------------------------------------------------------------------------------------------------------------------------------------------------------------------------------------------------------------------------------------------|
|                         | -water level Hamburg rank 4 of recent decades                                                                                                                                                                                                                                                                                                                                            |
| Mueller-Navarra (2005)  | Mueller-Navarra, Sylvin, Sturmfluten. Land under an Nord- und Ostsee, in: Entfesselte Elemente-Der Mensch und die Kraefte der Natur, 5, 92-99, Guetersloh. Wissen-Media-Verl., 2005<br>-ranking of water level for storms in period 1962-1999                                                                                                                                            |
| Jensen et al (2006)     | Jensen J, C Mudersbach, SH Mueller-Navarra, I Bork, C Koziar, V Renner, Modellgestuetzte Untersuchungen zu Sturmfluten mit sehr geringen Eintrittswahrscheinlichkeiten an der deutschen Nordseekueste, Die Kueste, 71, 123-167, 2006.<br>-tabulated information to calculate return period levels for Emden, Norderney, Bremerhaven, Cuxhaven, Helgoland, Buesum, Husum, Dagebuell, List |
| Danhostel-Ribe (2013)   | Danhostel-Ribe, Sturmfluten, <a href="https://web.archive.org/web/20131215125955/http://www.danhostel-ribe.dk/de/sturmfluten">https://web.archive.org/web/20131215125955/http://www.danhostel-ribe.dk/de/sturmfluten</a> , accessed 25Apr2021<br>-previous comparable water level before Anatol 27Nov1825 and then 11Oct1634                                                             |
| Ditlevesen et al (2018) | Ditlevsen C, MM Ramos, C Sorensen, UR Ciocan, T Pionkowitz, Hojvandsstatistikker 2017, Miljo- og Foedevareministeriet, Kystdirektoratet Lemvig, Februar, 2018<br>-information to calculate return period of water level for Storm Anatol                                                                                                                                                 |
| Wikipedia (20210418)    | Wikipedia, Orkan Anatol, <a href="https://de.wikipedia.org/wiki/Orkan_Anatol">https://de.wikipedia.org/wiki/Orkan_Anatol</a> , accessed 18Apr2021<br>-rank 2 water level in Ribe after Buchardi 1634 flood; equal in height to 1825 surge<br>-rank 4 storm surge Hamburg                                                                                                                 |

Table SL20. Return period of wind speed; ranking of wind speed

| Source                         | Full Reference and Notes                                                                                                                                                                                                                                                                                                                                                                                                                              |
|--------------------------------|-------------------------------------------------------------------------------------------------------------------------------------------------------------------------------------------------------------------------------------------------------------------------------------------------------------------------------------------------------------------------------------------------------------------------------------------------------|
| Brugge (1999)                  | Brugge, Roger, Weather Diary, Dec 1999 <a href="http://www.met.reading.ac.uk/~brugge/diary1999.html#1299">www.met.reading.ac.uk/~brugge/diary1999.html#1299</a><br>-75mph gust at Leeds was December records                                                                                                                                                                                                                                          |
| Met Eireann (199912)           | Met Eireann, Monthly Weather Bulletin, no. 164, Dec, 1999<br>-mean wind speeds for the month were above normal everywhere<br>-mean wind speeds for Belmullet and Malin Head were highest for December for 5-16 years.                                                                                                                                                                                                                                 |
| Vedin and Alexandersson (1999) | Vedin, Haldo and Hans Alexandersson, Arhunderadets storm? Vaader och Vatten, p.18, Dec, 1999<br>-previous comparable storms from Sweden from 1967, 1981 and after                                                                                                                                                                                                                                                                                     |
| Kristensen et al (2000)        | Kristensen L, O Rathmann, SO Hansen, Extreme wind in Denmark, Journal of Wind Engineering and Industrial Aerodynamics, 87, 147-166, 2000.<br>-return period maximum wind speed Skjern (47y), Kegnaes (27y), Tystofte (204y)<br>-low value for Kegnaes may be due to WASP corrections to standard conditions                                                                                                                                           |
| Mann and Hansen (2000)         | Mann AJ, SO Hansen, En storm gor ingen norm, Vejret, no.1. 22.Argang, 82, pp.28-34, Februar 2000.<br>-return period graph and reduced wind speed for Horns Rev indicate that Anatol was a 400year event                                                                                                                                                                                                                                               |
| Voldberg (2000)                | Voldberg Henrik, Vredens julemaaned, Vejret, 82, no.1, 1-7, Feb, 2000.<br>-description as Danmark-Arhundrets orkan                                                                                                                                                                                                                                                                                                                                    |
| IEA (2001)                     | IEA, Wind Energy Annual Report 2000, International Energy Agency, National Renewable Energy Laboratory, May, 2001. (Author Ian Fletcher) pdf document properties: datestamp: 08Jul2005;<br>-Database on wind energy characteristics 1996-1998<br>-Toboel wind field data (3000h, Denmark with 400y wind event; storm 03Dec1999)                                                                                                                       |
| DWD (20020528)                 | DWD, Orkantief 'Anatol' von 3./4. Dezember 1999 (5pp), <a href="https://www.dwd.de/DE/leistungen/besondereereignisse/stuerme/19991204_orkantief_anatol.pdf">https://www.dwd.de/DE/leistungen/besondereereignisse/stuerme/19991204_orkantief_anatol.pdf</a> [pdf document properties: datestamp: 28May2002]<br>-wind speed record for station in Denmark and some stations in northernmost Germany                                                     |
| Munich Re (2002)               | Munich Re, Winter Storms in Europe (II), Analysis of 1999 losses and loss potentials, Muenchener Rueck, Munich Re Group, 76pp, 2002<br>-rank 1 wind speed Sylt; previous record 1976<br>-rank 1 record wind speed Romo Denmark                                                                                                                                                                                                                        |
| Nilsson et al (2007)           | Nilsson C, S Goyette, L Barring, Relating forest damage data to the wind field from high-resolution RCM simulations: case study of Anatol striking Sweden in December 1999, Global and Planetary Change, 57, 161-176, 2007.<br>-Sweden Falsterbo stations register most violent wind speed since 1967<br>-several stations in Denmark registered highest wind speeds up to that time                                                                  |
| Della-Marta et al (2009)       | Della-Marta PM, H Mathis, C Frei, MA Liniger, J Kleinn, C Appenzeller, The return period of wind storms over Europe, International Journal of Climatology, 29, 437-459, 2009.<br>-return period WS10: 4.31y (2.82-6.72y)<br>-return period FG10: 2.93 (2.09-4.17)                                                                                                                                                                                     |
| SMHI (20111013)                | SMHI_20111013, Hosten 1999 - Arhunderadets storm? 13Oct2011<br>( <a href="https://www.smhi.se/kunskapsbanken/meteorologi/hosten-1999-arhunderadets-storm-1.5762">https://www.smhi.se/kunskapsbanken/meteorologi/hosten-1999-arhunderadets-storm-1.5762</a> )<br>-map of gust return periods for Sweden showing values of 50 years in southernmost Scania                                                                                              |
| Decker (2018)                  | Decker, Lauge, Windthrow risk assessment of Douglas-fir stands in Denmark. A comparison study of Douglas-fir (Pseudotsuga menziesii) and Norway spruce (Picea abies), M.Sc. thesis, University of Copenhagen, submitted 6Aug2018 [pdf properties: title=Notatbog; author=Lauge Decker, Subject=SKOG303 - Silviculture and forest growth yield]<br>-for 100y series 5y interval between major windthrow; 10y interval between 250000m3 throw           |
| Capellen (2019)                | Capellen, John, Orkaner paa vore breddegrader, updated 8Jan2019 <a href="https://www.dmi.dk/vejr-og-atmosfare/temafor-side-vind/orkaner-paa-vore-breddegrader/">https://www.dmi.dk/vejr-og-atmosfare/temafor-side-vind/orkaner-paa-vore-breddegrader/</a> , (webpage downloaded 12Oct2020)<br>-Anatol very high wind speeds registered avg 38.1m/s, gust 51.4m/s<br>-record stood until hurricane Allan Oct 2013 /w highest avg=39.5m/s, gust 53.5m/s |

Table SL21. Storm trajectory map (arranged by year and then alphabetically)

| Source         | Full Reference and Notes                                                                                |
|----------------|---------------------------------------------------------------------------------------------------------|
| DMI (19991209) | DMI, Rapport. Orkanen over Danmark den 3.-4. december 1999, Danmarks Meteorologiske Institut, Lyngbyvej |

|                                |                                                                                                                                                                                                                                                                                                                                                                                                                                                                                                                                                                                                                                                                                                                                                                                                                |
|--------------------------------|----------------------------------------------------------------------------------------------------------------------------------------------------------------------------------------------------------------------------------------------------------------------------------------------------------------------------------------------------------------------------------------------------------------------------------------------------------------------------------------------------------------------------------------------------------------------------------------------------------------------------------------------------------------------------------------------------------------------------------------------------------------------------------------------------------------|
|                                | 100, DK-2100 Kobenhaven 0, 9Dec1999.<br>-map showing trajectory and central pressures at 3h intervals between 3Dec1999 1200-2100UTC                                                                                                                                                                                                                                                                                                                                                                                                                                                                                                                                                                                                                                                                            |
| RWS (1999)                     | RWS, Verslag van de Stormvloed van 3 en 4 december 1999 (SR79), Ministerie van Verkeer en Waterstaat, Directoraat-Generaal Rijkswaterstaat, Rijksinstituut voor Kust en Zee, Stormvloedwaarschuwingsdienst, Postbus 20907, 2500EX 's-Gravenhage, 's-Gravenhage, december 1999.<br>-FIG2. [MAP] Trajectory of the low pressure centre and surface pressure at 4Dec1999 1300MET                                                                                                                                                                                                                                                                                                                                                                                                                                  |
| Vedin and Alexandersson (1999) | Vedin, Haldo and Hans Alexandersson, Aarhunderadets storm? Vaader och Vatten, p.18, Dec, 1999<br>-FIG1. [MAP] Map of lowest surface pressures during passage of low pressure.<br>Arrow shows trajectory of low pressure center with times marked. 10min avg & gusts shown                                                                                                                                                                                                                                                                                                                                                                                                                                                                                                                                      |
| Rosenorn (2000)                | Rosenorn, Af Stig, De kraftigste storme i det tyvende aarhundrede in Denmark, Vejret, 82, 15-18, Februar 2000<br>-Denmark map with low pressure trajectory indicated                                                                                                                                                                                                                                                                                                                                                                                                                                                                                                                                                                                                                                           |
| Voldberg (2000)                | Voldberg Henrik, Vredens julemaaned, Vejret, 82, no.1, 1-7, Feb, 2000.<br>-trajectory map with min low pressure marked 3Dec1999 0000UTC to 4Dec1999 0300UTC                                                                                                                                                                                                                                                                                                                                                                                                                                                                                                                                                                                                                                                    |
| Ulblich et al (2001)           | Ulblich U, AH Fink, M Klawa, JG Pinto, Three extreme storms over Europe in December 1999, Weather 56, 70-80, 2001<br>-minimum pressure trajectory at 6h intervals                                                                                                                                                                                                                                                                                                                                                                                                                                                                                                                                                                                                                                              |
| DWD (20020528)                 | DWD, Orkantief 'Anatol' von 3./4. Dezember 1999 (5pp),<br><a href="https://www.dwd.de/DE/leistungen/besondereereignisse/stuerme/19991204_orkantief_anatol.pdf">https://www.dwd.de/DE/leistungen/besondereereignisse/stuerme/19991204_orkantief_anatol.pdf</a> [pdf document properties: datestamp: 28May2002]<br>-[MAP] storm trajectory in 3h station on rectilinear axes                                                                                                                                                                                                                                                                                                                                                                                                                                     |
| Munich Re (2002)               | Munich Re, Winter Storms in Europe (II), Analysis of 1999 losses and loss potentials, Muenchener Rueck, Munich Re Group, 76pp, 2002<br>-Anatol trajectory map given: 02Dec1999 2100UTC to 09Dec1999 0900UTC                                                                                                                                                                                                                                                                                                                                                                                                                                                                                                                                                                                                    |
| Nilsson et al (2007)           | Nilsson C, S Goyette, L Barring, Relating forest damage data to the wind field from high-resolution RCM simulations: case study of Anatol striking Sweden in December 1999, Global and Planetary Change, 57, 161-176, 2007.<br>-FIG2. [MAP] Mean sea level pressure field and 1000hPa wind vectors of 3Dec1999 1800UTC computed from NCEP-NCAR reanalysis. Units are hPa with isobars every 5hPa.<br>Wind speed vectors in m/s. Superimposed on this field is the track of the low pressure system that produced the storm Anatol from 2Dec 1200UTC to 5Dec 1200UTC with P in hPa every 6h.<br>-FIG3. [MAP] Map showing the track of the low pressure centre across southern Sweden on 3-4Dec1999. The lines show the lowest pressure during the passage, and the Ltt show the low pressure centre at time tt. |
| Fink et al (2009)              | Fink AH, T Brucher, V Ermert, A Kruger, JG Pinto, The European storm Kyrill in Jan 2007: synoptic evolution, meteorological impacts and some considerations with respect to climate change, Natural Hazards and Earth System Sciences, 9, 405-423, 2009.<br>-map with storm trajectory from NCEP-1 reanalysis field                                                                                                                                                                                                                                                                                                                                                                                                                                                                                            |
| Gardiner (2010)                | Gardiner, Barry, Appendix 3: Background information on 11 storms selected for detailed analysis, European Forest Institute, Atlantic European Regional Office - EFIAtlantic, 161 pp. [PDF properties: datestamp 23Jul2010]<br>-map with schematic trajectories of storms Anatol, Lothar, Martin in Dec 1999                                                                                                                                                                                                                                                                                                                                                                                                                                                                                                    |
| SMHI (20111013)                | SMHI_20111013, Hosten 1999 - Arhundradets storm? 13Oct2011<br>( <a href="https://www.smhi.se/kunskapsbanken/meteorologi/hosten-1999-arhundradets-storm-1.5762">https://www.smhi.se/kunskapsbanken/meteorologi/hosten-1999-arhundradets-storm-1.5762</a> )<br>-map showing trajectory of the Anatol low pressure center across Scania                                                                                                                                                                                                                                                                                                                                                                                                                                                                           |
| XWS (20200906)                 | XWS, Extreme Wind Storms Catalogue, <a href="http://www.europeanwindstorms.org/cgi-bin/storms/storms.cgi">http://www.europeanwindstorms.org/cgi-bin/storms/storms.cgi</a> , accessed 06Sep2020                                                                                                                                                                                                                                                                                                                                                                                                                                                                                                                                                                                                                 |

Table SL22. Unusual pressure drop; time series central pressure; explosive characteristics; bomb (arranged by year and then alphabetically)

| Source                         | Full Reference and Notes                                                                                                                                                                                                                                                                                                                                                                |
|--------------------------------|-----------------------------------------------------------------------------------------------------------------------------------------------------------------------------------------------------------------------------------------------------------------------------------------------------------------------------------------------------------------------------------------|
| Brugge (1999)                  | Brugge, Roger, Weather Diary, Dec 1999 <a href="http://www.met.reading.ac.uk/~brugge/diary1999.html#1299">www.met.reading.ac.uk/~brugge/diary1999.html#1299</a><br>-Dun Laoghaire had 9mb fall in pressure over 3h period to 3Dec1999 0000UTC                                                                                                                                           |
| DMI (19991209)                 | DMI, Rapport. Orkanen over Danmark den 3.-4. december 1999, Danmarks Meteorologiske Institut, Lyngbyvej 100, DK-2100 Kobenhaven 0, 9Dec1999.<br>-comment that explosively deepening low pressure centres near Denmark are difficult to forecast                                                                                                                                         |
| UKMO (1999)                    | UKMO, Daily Weather Summary, 26Nov1999 to 05Dec1999<br>-Storm Anatol pressure drop given in series of maps of Daily Weather Summary                                                                                                                                                                                                                                                     |
| Aakjaer (2000)                 | Aakjaer AF, Orkanen i Nordsoen den 30. oktober 2000, Vejret, 85, 1-7, 2000<br>-time series of central drop; comparison of hurricanes 30Oct2000, 3-4Dec1999, and Faeroe hurricane from 1993.<br>-hurricanes 1999 and 2000 were similar to each other; Faeroe 1993 hurricane much deeper<br>-reference to atmospheric bomb used by US meteorologists to describe their east coast storms. |
| Bancroft (2000)                | Bancroft, George P., Marine Weather Review - North Atlantic Area September through December 1999, Mariners Weather Log, Vol.44, No.1, April 2000. pp.23-38.<br>-966mb in North Sea at 1200UTC 03Dec<br>-remarkable 49mb drop in central pressure in 24h; 14mb in last 6h<br>-500mb analysis valid 00UTC 03Dec shows short wave trough that amplified with upper low east of Iceland     |
| Neckelmann and Petersen (2000) | Neckelmann, S. and J. Petersen, Evaluation of the stand-alone wind and wave measurement systems for Horns Rev 150MW offshore wind farm in Denmark, OWEMES 2000, ATENA, Rome, Sicily, pp.17-27, 2000<br>-measured time series of atmospheric pressure at 55m height on 62m mast                                                                                                          |
| Nielsen and Nielsen (2000)     | Nielsen, Jacob Woge and Nielsen, Mads Hvid, Stormfloden foraarsaget af orkanen den 3. december 1999, Vejret, 82, 8-14, Februar 2000<br>-hurricane with explosive development                                                                                                                                                                                                            |
| Voldberg (2000)                | Voldberg Henrik, Vredens julemaaned, Vejret, 82, no.1, 1-7, Feb, 2000.<br>-storm forecast initially confirmed with stations in NW Ireland with P drops of 10mb in 3h.<br>-map shows rapid development 995 to 958hPa drop in 12h from W of Hebrides to Nsea                                                                                                                              |



|                                         |                                                                                                                                                                                                                                                                                                                                                                                                                                                                                                                                                                                                         |
|-----------------------------------------|---------------------------------------------------------------------------------------------------------------------------------------------------------------------------------------------------------------------------------------------------------------------------------------------------------------------------------------------------------------------------------------------------------------------------------------------------------------------------------------------------------------------------------------------------------------------------------------------------------|
| Woetmann Nielsen (2000)                 | Woetmann Nielsen, AN, DMI-HIRLAM's forudsigelse af orkanen den 3.december 1999. Vejret, 82, pp. 19-23, februar 2000.<br>-difficult to simulate all details of explosive cyclogenesis in DMI Hirlam                                                                                                                                                                                                                                                                                                                                                                                                      |
| Ulblich et al (2001)                    | Ulblich U, AH Fink, M Klawa, JG Pinto, Three extreme storms over Europe in December 1999, Weather 56, 70-80, 2001<br>-rapid intensification of central pressure after it approached British Isles from 990 mb 0000GMT 03Dec1999 to 957 mb 1200GMT 03Dec1999 over central North Sea (note bomb criterion met)<br>-minimum pressure 953mb near east coast of Jutland                                                                                                                                                                                                                                      |
| Buizza and Hollingsworth (2001)         | Buizza, Roberto and Anthony Hollingsworth, Severe weather prediction using the ECMWF EPS - The European Storms of December 1999, ECMWF Newsletter, No. 89, Winter 2000/01.<br>-storm central pressure dropped from 996 to 961hPa in 12h from 0000Z to 1200Z on 3Dec1999                                                                                                                                                                                                                                                                                                                                 |
| Buizza and Hollingsworth (2002)         | Buizza, Roberto and Anthony Hollingsworth, Storm prediction over Europe using the ECMWF ensemble prediction system, Meteorol. Appl., 9, 2002<br>-storm central pressure dropped from 996 to 961hPa in 12h from 0000Z to 1200Z on 3Dec1999                                                                                                                                                                                                                                                                                                                                                               |
| DWD (20020528)                          | DWD, Orkantief 'Anatol' von 3./4. Dezember 1999 (5pp), <a href="https://www.dwd.de/DE/leistungen/besondereereignisse/stuerme/19991204_orkantief_anatol.pdf">https://www.dwd.de/DE/leistungen/besondereereignisse/stuerme/19991204_orkantief_anatol.pdf</a> [pdf document properties: datestamp: 28May2002]<br>-unusual pressure drop of 40hPa in 12h<br>-[FIG] Time series showing fast pressure drop and increase at List auf Sylt and Torup Sweden                                                                                                                                                    |
| Woetmann Nielsen and Hansen Sass (2003) | Woetmann Nielsen N and B Hansen Sass, A numerical, high-resolution study of the life cycle of the severe storm over Denmark on 3Dec1999, Tellus, 55A, 338-351, 2003.<br>-maximum deepening rate 80hPa/day as low pressure center passed under jet stream<br>-atmospheric bomb of Sanders and Gyakum (1980)                                                                                                                                                                                                                                                                                              |
| Nilsson et al (2007)                    | Nilsson C, S Goyette, L Barring, Relating forest damage data to the wind field from high-resolution RCM simulations: case study of Anatol striking Sweden in December 1999, Global and Planetary Change, 57, 161-176, 2007.<br>-max deepening rate 13hPa/6h when it crossed northern Scotland<br>-deepened further when it crossed North Sea night to Dec3<br>-crossed S Scandinavia night 3-4Dec1999<br>-sfc P=952hPa over Jylland Denmark 1900UTC 3Dec                                                                                                                                                |
| Pelt (2013)                             | Pelt, S., Kraftige storme med oprindelse i Nordatlanten, Vejret, 137, 44-47, 2013<br>-mention of unusual pressure drop and bomb characteristics for Braer storm 8-11Jan1993 & Oct 1967 storm but not Anatol                                                                                                                                                                                                                                                                                                                                                                                             |
| Cappelen et al (2018)                   | Cappelen J, S Olufsen, MH Ribegaard, JW Nielsen, T Schmith, N Hansen, Det traekker op til orkan, updated 25Jun2018, <a href="https://www.dmi.dk/vejr-og-atmosfare/temaforside-decemberorkanen-1999/det-traekker-op-til-orkan/">https://www.dmi.dk/vejr-og-atmosfare/temaforside-decemberorkanen-1999/det-traekker-op-til-orkan/</a><br>-early Friday 3Dec ... the low pressure was deepening explosively<br>-within 12h central pressure fell from 996hPa to 958hPa on way west from Hebrides to central Nsea<br>-low P center achieved min of 952.4hPa (lowest ever was 943.9hPa) from Skive to Anholt |
| World Energy Council (2019)             | World Energy Council, Case Study Series, Extreme Weather, Windstorms France December 1999, <a href="https://www.worldenergy.org/assets/downloads/Windstorms_France_-_Extreme_weather_conditions_SEP_2019.pdf">https://www.worldenergy.org/assets/downloads/Windstorms_France_-_Extreme_weather_conditions_SEP_2019.pdf</a> , pdf date stamp: 11Oct2019<br>-explosive deepening for Lothar; meteorological bomb                                                                                                                                                                                          |

Table SL23. Low level jet

| Source                                  | Full Reference and Notes                                                                                                                                                                                                                                                                                             |
|-----------------------------------------|----------------------------------------------------------------------------------------------------------------------------------------------------------------------------------------------------------------------------------------------------------------------------------------------------------------------|
| Woetmann Nielsen and Hansen Sass (2003) | Woetmann Nielsen N and B Hansen Sass, A numerical, high-resolution study of the life cycle of the severe storm over Denmark on 3Dec1999, Tellus, 55A, 338-351, 2003.<br>-low level jet seen in model simulations                                                                                                     |
| Nilsson et al (2007)                    | Nilsson C, S Goyette, L Barring, Relating forest damage data to the wind field from high-resolution RCM simulations: case study of Anatol striking Sweden in December 1999, Global and Planetary Change, 57, 161-176, 2007.<br>-atmospheric sounding theta_v increasing from 900-500hPa; low level jet at 1500-2000m |
| Pelt (2013)                             | Pelt, S., Kraftige storme med oprindelse i Nordatlanten, Vejret, 137, 44-47, 2013<br>-mention of low level jet for most severe storms<br>-starts in NE quadrant and spirals counterclockwise                                                                                                                         |

Table SL24. Sting Jet

| Source      | Full Reference and Notes                                                                                                                                                             |
|-------------|--------------------------------------------------------------------------------------------------------------------------------------------------------------------------------------|
| Pelt (2013) | Pelt, S., Kraftige storme med oprindelse i Nordatlanten, Vejret, 137, 44-47, 2013<br>-mention of sting jet for some of most severe storms: Allan 28Oct2013, Great Storm 15-16Oct1987 |

Table SL25. Radiosonde analysis

| Source                           | Full Reference and Notes                                                                                                                                                                                                                                                                                                                                                                                                                                                                     |
|----------------------------------|----------------------------------------------------------------------------------------------------------------------------------------------------------------------------------------------------------------------------------------------------------------------------------------------------------------------------------------------------------------------------------------------------------------------------------------------------------------------------------------------|
| DWD (20020528)                   | DWD, Klimatologische Bewertung der juensten Stark-Windereignisse (Anatol und Lothar) aus der Sicht der Klimatologie der freien Atmosphaere, [pdf document properties: 28/05/2002]<br>-maximum wind speed in the radiosondes for stations in central and western Europe<br>-unusual number of cases of high wind speeds >60m/s and >80m/s during winter 1995/6, 1996/7, 1997/8<br>-Radiosonde wind speeds during Anatol reached >60 and 80m/s<br>-north-south gradient in maximum wind speeds |
| University of Wyoming (20210914) | University of Wyoming, <a href="http://weather.uwyo.edu/upperair/sounding.html">http://weather.uwyo.edu/upperair/sounding.html</a> , last access 14Sep2021<br>-global database radiosonde measurements, including the period of Storm Anatol.                                                                                                                                                                                                                                                |

Table SL26. Stable atmospheric boundary layer

| Source               | Full Reference and Notes                                                                                                                                                                                                                                                                                             |
|----------------------|----------------------------------------------------------------------------------------------------------------------------------------------------------------------------------------------------------------------------------------------------------------------------------------------------------------------|
| Nilsson et al (2007) | Nilsson C, S Goyette, L Barring, Relating forest damage data to the wind field from high-resolution RCM simulations: case study of Anatol striking Sweden in December 1999, Global and Planetary Change, 57, 161-176, 2007.<br>-atmospheric sounding theta_v increasing from 900-500hPa; low level jet at 1500-2000m |

Table SL27. Strong jet stream

| Source                                  | Full Reference and Notes                                                                                                                                                                                                                                                                                                                                                                                                                                                                                                                                                                                                                                                                                          |
|-----------------------------------------|-------------------------------------------------------------------------------------------------------------------------------------------------------------------------------------------------------------------------------------------------------------------------------------------------------------------------------------------------------------------------------------------------------------------------------------------------------------------------------------------------------------------------------------------------------------------------------------------------------------------------------------------------------------------------------------------------------------------|
| Bancroft (2000)                         | Bancroft, George P., Marine Weather Review - North Atlantic Area September through December 1999, Mariners Weather Log, Vol.44, No.1, April 2000. pp.23-38.<br>-p30. Dec was very active with strong W of SW flow aloft leading to a series of strong low P systems moving into W Europe beginning 3Dec                                                                                                                                                                                                                                                                                                                                                                                                           |
| Bell et al (2000)                       | Bell GD, MS Halpert, RS Schnell, RW Higgins, J Lawrimore, VE Kousky, R Tinker, W Thlaw, M Chelliah, A Arthusa, Climate Assessment for 1999, Bulletin of the American Meteorological Society, 81, S1-S50, 2000<br>-strong jet stream displaced to low altitude during Dec 1999                                                                                                                                                                                                                                                                                                                                                                                                                                     |
| Woetmann Nielsen (2000)                 | Woetmann Nielsen, AN, DMI-HIRLAM's forudsigelse af orkanen den 3.december 1999. Vejret, 82, pp. 19-23, februar 2000.<br>-problems simulating jet stream in ECMWF because of different spatial resolution the in zonal and meridional directions                                                                                                                                                                                                                                                                                                                                                                                                                                                                   |
| UN/ECE (2000)                           | UN/ECE Timber Committee, Chapter 3. Effects of the December 1999 storms on European timber markets, ECE/FAO Forest Products Annual Market Review, 1999-2000, 15pp, 2000, Timber Bulletin, Vol LIII, ECE/TIM/BULL/53/3 [pdf document properties: title=3stormdamageFIN.PDF; author=najera; datestamp=15/08/2000] <a href="https://www.unece.org/fileadmin/DAM/timber/docs/rev-00/rev00.htm">https://www.unece.org/fileadmin/DAM/timber/docs/rev-00/rev00.htm</a><br>-bizarre meteorological combination combined 3 factors for 26-28Dec storms<br>a. blast of strong polar air<br>b. jet stream oscillating 350-400km/h compared to normal 100kph<br>c. series of zones of extremely low pressure at low altitudes |
| DWD (20020528b)                         | DWD, Klimatologische Bewertung der juensten Stark-Windereignisse (Anatol und Lothar) aus der Sicht der Klimatologie der freien Atmosphaere. [pdf document properties: 28/05/2002]<br>-high radiosonde wind speeds during Storms Anatol and Lothar<br>-highest radiosonde wind speeds typically reached at tropopause (summer) or stratosphere                                                                                                                                                                                                                                                                                                                                                                     |
| Woetmann Nielsen and Hansen Sass (2003) | Woetmann Nielsen N and B Hansen Sass, A numerical, high-resolution study of the life cycle of the severe storm over Denmark on 3Dec1999, Tellus, 55A, 338-351, 2003.<br>-maximum deepening rate 80hPa/day as low pressure center passed under jet stream                                                                                                                                                                                                                                                                                                                                                                                                                                                          |
| Nilsson et al (2007)                    | Nilsson C, S Goyette, L Barring, Relating forest damage data to the wind field from high-resolution RCM simulations: case study of Anatol striking Sweden in December 1999, Global and Planetary Change, 57, 161-176, 2007.<br>-powerful Atlantic jet stream with wind speed 60-72m/s                                                                                                                                                                                                                                                                                                                                                                                                                             |
| Joyner (2013)                           | Joyner, T.A., Optimizing peak gust and maximum sustained wind speed estimates from mid-latitude wave cyclones, Louisiana State University Doctoral Dissertations, 421, 2013<br>-stronger than normal upper level jet for Storm Lothar                                                                                                                                                                                                                                                                                                                                                                                                                                                                             |

Table SL28. Squall line, convective thunderstorms, tornadoes (arranged by year and then alphabetically)

| Source        | Full Reference and Notes                                                                                                                                                                                                                                                                                                                                                                                                                       |
|---------------|------------------------------------------------------------------------------------------------------------------------------------------------------------------------------------------------------------------------------------------------------------------------------------------------------------------------------------------------------------------------------------------------------------------------------------------------|
| Brugge (1999) | Brugge, Roger, Weather Diary, Dec 1999 <a href="http://www.met.reading.ac.uk/~brugge/diary1999.html#1299">www.met.reading.ac.uk/~brugge/diary1999.html#1299</a><br>-low dragged cold front across all S areas of British Isles<br>-rain clearing in S England in evening<br>-snow showers as far S as N Wales and Shropshire, blocking roads in N & causing accidents<br>*-thunder reported in the showers from the Northern Isles to Cheshire |

Table SL29. Lightning (arranged by year and then alphabetically)

| Source                         | Full Reference and Notes                                                                                                                                                                                                                                                                                                                                     |
|--------------------------------|--------------------------------------------------------------------------------------------------------------------------------------------------------------------------------------------------------------------------------------------------------------------------------------------------------------------------------------------------------------|
| Neckelmann and Petersen (2000) | Neckelmann, S. and J. Petersen, Evaluation of the stand-alone wind and wave measurement systems for Horns Rev 150MW offshore wind farm in Denmark, OWEMES 2000, ATENA, Rome, Sicily, pp.17-27, 2000<br>-reference to lightning strike in Oct 1999 that severely damaged top anemometer                                                                       |
| Caithness Windfarm (20180730)  | CaithnessWindfarm, craigrd, Detailed accidents to 19 June 2018. Document time stamp 30/07/2018, 177pp Wind turbine accident compilation (start 30Nov1980) [Storm Anatol 1999 reports]<br>-lightning strike damages blades of turbines at Zennhausen Germany 3Dec1999<br>-lightning strike damages turbine blade at Westermarsch II, Norddeich, Niedersachsen |

Table SL30. Meso-vortex (arranged by year and then alphabetically)

| Source | Full Reference and Notes |
|--------|--------------------------|
|--------|--------------------------|

Table SL31. Meteotsunami and unusual surges (arranged by year and then alphabetically)

| Source         | Full Reference and Notes                                                                                                                                                                                                                                            |
|----------------|---------------------------------------------------------------------------------------------------------------------------------------------------------------------------------------------------------------------------------------------------------------------|
| Aakjaer (2000) | Aakjaer AF, Orkanen i Nordsoen den 30. oktober 2000, Vejret, 85, 1-7, 2000<br>-storm surge at Hvide Sande without strong storm winds on 30Oct2000<br>-dynamical effect shift of low P trajectory to north, releasing water as wave to flow north at long wave speed |

Table SL32. Hurricane gusts only on south (right) side of pressure center (arranged by year and then alphabetically)

| Source         | Full Reference and Notes                                                                                                                     |
|----------------|----------------------------------------------------------------------------------------------------------------------------------------------|
| DMI (19991209) | DMI, Rapport. Orkanen over Danmark den 3.-4. december 1999, Danmarks Meteorologiske Institut, Lyngbyvej 100, DK-2100 Kobenhaven 0, 9Dec1999. |

|                            |                                                                                                                                                                                                                                                                                                                                                                                                                                                                  |
|----------------------------|------------------------------------------------------------------------------------------------------------------------------------------------------------------------------------------------------------------------------------------------------------------------------------------------------------------------------------------------------------------------------------------------------------------------------------------------------------------|
|                            | -weather map 3Dec1999 1800UTC shows highest wind speeds only on right hand side of trajectory                                                                                                                                                                                                                                                                                                                                                                    |
| Aakjaer (2000)             | Aakjaer AF, Orkanen i Nordsoen den 30. oktober 2000, Vejret, 85, 1-7, 2000<br>-surface weather map shows strongest winds on right hand side of storm center 30 Oct 2000                                                                                                                                                                                                                                                                                          |
| Nielsen and Nielsen (2000) | Nielsen, Jacob Woge and Nielsen, Mads Hvid, Stormfloden foraarsaget af orkanen den 3. december 1999, Vejret, 82, 8-14, Februar 2000<br>-highest water levels in Vadehavet                                                                                                                                                                                                                                                                                        |
| Voldberg (2000)            | Voldberg Henrik, Vredens julemaaned, Vejret, 82, no.1, 1-7, Feb, 2000.<br>-hurricane gust were only S of the low P trajectory<br>-in north Jylland only few places with storm gusts to 25m/s both in front of and behind L                                                                                                                                                                                                                                       |
| Woetmann Nielsen (2000)    | Woetmann Nielsen, AN, DMI-HIRLAM's forudsigelse af orkanen den 3.december 1999. Vejret, 82, pp. 19-23, februar 2000.<br>-map of modelled maximum wind speeds in a strip across southern Denmark                                                                                                                                                                                                                                                                  |
| Frank and Majewki (2006)   | Frank, H, and D Majewski, Hindcasts of historic storms with the DWD models GME, LMQ and LMK using ERA-40 reanalysis, ECMWF Newsletter No. 109, autumn 2006, pp.16-21.<br>-model fields show strongest winds in cold sector to S and SW of low pressure center                                                                                                                                                                                                    |
| Fink et al (2009)          | Fink AH, T Brucher, V Ermert, A Kruger, JG Pinto, The European storm Kyrill in Jan 2007: synoptic evolution, meteorological impacts and some considerations with respect to climate change, Natural Hazards and Earth System Sciences, 9, 405-423, 2009.<br>-map of wind speed exceedance at the 98th percentile for Daria, Anatol, Kyrill show damaging winds almost entirely on right hand side of storm track                                                 |
| Pelt (2013)                | Pelt, S., Kraftige storme med oprindelse i Nordatlanten, Vejret, 137, 44-47, 2013<br>-maximum in wind speed to south of low pressure (right)<br>-low level jet LLJ; poison breath<br>-jet starts normally in NE quadrant; spreads south spiraling counterclockwise                                                                                                                                                                                               |
| Cappelen et al (2018d)     | Cappelen J, S Olufsen, MH Ribergaard, JW Nielsen, T Schmith, H Hansen, Dagen derpaa, updated 25Jun2018d, <a href="https://www.dmi.dk/vejr-og-atmosfare/temaforside-decemberorkanen-1999/dagen-derpaa/">https://www.dmi.dk/vejr-og-atmosfare/temaforside-decemberorkanen-1999/dagen-derpaa/</a><br>-little tree-fall loss in north Jylland on left hand side of trajectory                                                                                        |
| Cappelen et al (2018e)     | Cappelen J, S Olufsen, MH Ribergaard, JW Nielsen, T Schmith, N Hansen, Orkan passerer, updated 25Jun2018e, <a href="https://www.dmi.dk/vejr-og-atmosfare/temaforside-decemberorkanen-1999/orkanen-passerer/">https://www.dmi.dk/vejr-og-atmosfare/temaforside-decemberorkanen-1999/orkanen-passerer/</a><br>-only S of hurricane eye that winds achieved hurricane strength                                                                                      |
| Cappelen (2019)            | Capellen, John, Orkaner paa vore breddegrader, updated 8Jan2019 <a href="https://www.dmi.dk/vejr-og-atmosfare/temaforside-vind/orkaner-paa-vore-breddegrader/">https://www.dmi.dk/vejr-og-atmosfare/temaforside-vind/orkaner-paa-vore-breddegrader/</a> , (webapage downloaded 12Oct2020)<br>-almost entire country impacted<br>-except N Jylland wind gusts in most places reached 40-50m/s or 150-175km/h<br>-worst impacts in S Jylland, especially Waddensee |

Table SL33. Culmination time and location determines damage properties of storm

| Source                                  | Full Reference and Notes                                                                                                                                                                                                                                                                                                                         |
|-----------------------------------------|--------------------------------------------------------------------------------------------------------------------------------------------------------------------------------------------------------------------------------------------------------------------------------------------------------------------------------------------------|
| Vedin and Alexandersson (1999)          | Vedin, Haldo and Hans Alexandersson, Aarhunderadets storm? Vaader och Vatten, p.18, Dec, 1999<br>-moved NNE via Scotland and Nsea to Jylland where it culminated 19MET 3Dec at 953hPa central pressure                                                                                                                                           |
| Woetmann Nielsen and Hansen Sass (2003) | Woetmann Nielsen N and B Hansen Sass, A numerical, high-resolution study of the life cycle of the severe storm over Denmark on 3Dec1999, Tellus, 55A, 338-351, 2003.<br>-reference the deepening and mature phase                                                                                                                                |
| Pelt (2013)                             | Pelt, S., Kraftige storme med oprindelse i Nordatlanten, Vejret, 137, 44-47, 2013<br>-storms are most dangerous when they are intensifying                                                                                                                                                                                                       |
| RMS (2014)                              | RMS, 2013-2014 Winter Storms in Europe. An Insurance and Catastrophe Modeling Perspective. RMS White Paper. [PDF TIMESTAMP 11Mar2014]<br>-presentation of storm tracks for early winter 1990 and winter 2013-2014 showing atmospheric pressure nadir points<br>-storm considered less serious if pressure nadir points to west of British Isles. |

Table SL34. Infragravity wave, rogue wave, green water incidents (arranged by year and then alphabetically)

| Source                   | Full Reference and Notes                                                                                                                                                                                                                                                                                                                                                                                                |
|--------------------------|-------------------------------------------------------------------------------------------------------------------------------------------------------------------------------------------------------------------------------------------------------------------------------------------------------------------------------------------------------------------------------------------------------------------------|
| Leonhardsen et al (2001) | Leonhardsen RL, G Ersdal, A Kvitrud, Experience and risk assessment of FPSOs in use on the Norwegian Continental Shelf. Description of Events, The Eleventh International Offshore and Polar Engineering Conference, International Society of Offshore and Polar Engineerings, 2001. 6pp. Paper No. 2001-IL-05 [pdf document datastamp=08Apr2001]<br>-green water incidents on 30Nov1999 to Asgard A and Petrojarl Varg |

Table SL35. Wave dynamics and dike breaches; wave runup studies (arranged by year and then alphabetically)

| Source                 | Full Reference and Notes                                                                                                                                                                                                                                                                                                                                                                                                                                                                                                                                                                                                                                                                                                                                                             |
|------------------------|--------------------------------------------------------------------------------------------------------------------------------------------------------------------------------------------------------------------------------------------------------------------------------------------------------------------------------------------------------------------------------------------------------------------------------------------------------------------------------------------------------------------------------------------------------------------------------------------------------------------------------------------------------------------------------------------------------------------------------------------------------------------------------------|
| Schrovers et al (2007) | Schrovers M, J Dekker, R Groenendaal, H Peters, Inventory wave data for model calibration, Rijksinstituut voor Kust en Zee, Rijkswaterstaat, July, 2007 [pdf timestamp 07Jan2016]<br>* -'the dike breached in 1999. Hereafter, wave locations in the tidal basin between the islands of Romo and Mando (including the location closest a dike, 3013) were set-up especially to check wave propagation in this inlet'<br>-'During the 1999 event there were high water levels at the mainland dykes, which was one of the causes for failure. It is believed that the back flow after this initial setup was one of the causes for the dike on the lee side of Romo to fail.<br>DCA would very much like input on how and where to measure this back flow effect including the waves' |

Table SL36. Precipitation, river level dike breaches (arranged by year and then alphabetically)

| Source | Full Reference and Notes |
|--------|--------------------------|
|--------|--------------------------|

Table SL37. Unusual peak of significant wave height in northern North Sea (arranged by year and then alphabetically)

| Source | Full Reference and Notes |
|--------|--------------------------|
|--------|--------------------------|

Table SL38. Double surge peak from wind and travelling wave (arranged by year and then alphabetically)

| Source                       | Full Reference and Notes                                                                                                                                                                                                                                                                                                                                                                                                 |
|------------------------------|--------------------------------------------------------------------------------------------------------------------------------------------------------------------------------------------------------------------------------------------------------------------------------------------------------------------------------------------------------------------------------------------------------------------------|
| Neckmann and Petersen (2000) | Neckelmann, S. and J. Petersen, Evaluation of the stand-alone wind and wave measurement systems for Horns Rev 150MW offshore wind farm in Denmark, OWEMES 2000, ATENA, Rome, Sicily, pp.17-27, 2000<br>-double peak in wind speed across 2.5h period of hurricane maximum                                                                                                                                                |
| Capellen et al (2018b)       | Cappelen J, S Olufsen, MH Ribergaard, JW Nielsen, T Schmith, N Hansen, Stormfloden under decemberorkanen, updated 25Jun2018b, <a href="https://www.dmi.dk/vejr-og-atmosfare/temaforside-decemberorkanen-1999/stormfloden-under-decemberorkanen/">https://www.dmi.dk/vejr-og-atmosfare/temaforside-decemberorkanen-1999/stormfloden-under-decemberorkanen/</a><br>-second high water after midnight lasting until morning |

Table SL39. Very low water levels (arranged by year and then alphabetically)

| Source                 | Full Reference and Notes                                                                                                                                                                                                                                                                                                                                                                                                                                                                                                                                                                                                  |
|------------------------|---------------------------------------------------------------------------------------------------------------------------------------------------------------------------------------------------------------------------------------------------------------------------------------------------------------------------------------------------------------------------------------------------------------------------------------------------------------------------------------------------------------------------------------------------------------------------------------------------------------------------|
| Capellen et al (2018b) | Cappelen J, S Olufsen, MH Ribergaard, JW Nielsen, T Schmith, N Hansen, Stormfloden under decemberorkanen, updated 25Jun2018b, <a href="https://www.dmi.dk/vejr-og-atmosfare/temaforside-decemberorkanen-1999/stormfloden-under-decemberorkanen/">https://www.dmi.dk/vejr-og-atmosfare/temaforside-decemberorkanen-1999/stormfloden-under-decemberorkanen/</a><br>-in indre dansk farvand, east facing coasts dry; harbours had yachts luying on ground<br>-water levels fell to 2m below normal; lowest ever registered<br>-lost water sent into Baltic and turned back in course of Friday as high water S of Baelthavet |

Table SL40. Modelled turbulence kinetic energy in ocean wave model (arranged by year and then alphabetically)

| Source | Full Reference and Notes |
|--------|--------------------------|
|--------|--------------------------|

Table SL41. Classification of storm surges (arranged by year and then alphabetically)

| Source                     | Full Reference and Notes                                                                                                                                                                                                                                                                                                                                                                                                                                                                         |
|----------------------------|--------------------------------------------------------------------------------------------------------------------------------------------------------------------------------------------------------------------------------------------------------------------------------------------------------------------------------------------------------------------------------------------------------------------------------------------------------------------------------------------------|
| Keers (1966)               | Keers, JF, The meteorological conditions leading to storm surges in the North Sea, Meteorological Magazine, London, 95, (1130), 261-272, Sept. 1966<br>-Four types of storm surges for England east coast                                                                                                                                                                                                                                                                                        |
| Mueller-Navarra (2005)     | Mueller-Navarra, Sylvain, Sturmfluten. Land under an Nord- und Ostsee, in: Entfesselte Elemente-Der Mensch und die Kraefte der Natur, 5, 92-99, Guetersloh. Wissen-Media-Verl., 2005<br>-Windstau type versus Circulation Type<br>-Anatol belonged to Circulation type; rapid passage over British Isles and intensification over North Sea                                                                                                                                                      |
| Frank and Majewski (2006)  | Frank, H. and D Majewski, Hindcasts of historic storms with the DWD models GME, LMQ and LMK using ERA-40 reanalysis, ECMWF Newsletter No. 109, autumn 2006, pp.16-21.<br>-comment that trajectory of storm between Scotland and Jutland, similar to summer storm Aug 1990                                                                                                                                                                                                                        |
| Von Storch and Woth (2008) | von Storch, Hans and Katja Woth, Storm surges: perspectives and options, Sustain Sci, 3, 33-43, 2008<br>-tropical versus extratropical storms and surges                                                                                                                                                                                                                                                                                                                                         |
| Kristandt et al (2014)     | Kristandt, J, B Brecht, H Frank, H Knaack, Optimization of empirical storm surge forecast – modelling of high resolution wind fields, Die Kuste, 18, 301-308, 2014<br>-Surge storm types: Scandinavia type, Skaggerak type, Jutland type (Petersen and Rodhe, 1991)<br>-Anatol belonged to Jutland type like Capella 1976<br>-Jutland type: develop at Nfld coast; cross 8E at 55-57N; short duration, very strong storms; affect mostly W coast Schleswig Holstein & Elbe; example Capella 1976 |
| RMS (2014)                 | RMS, 2013-2014 Winter Storms in Europe. An Insurance and Catastrophe Modeling Perspective. RMS White Paper. [PDF TIMESTAMP 11Mar2014]<br>-classification of serious European winter storms by location of where central pressure reaches minimum                                                                                                                                                                                                                                                 |

Table SL42. Fatalities & injuries

| Source                          | Full Reference and Notes                                                                                                                                                                                                                                                                                                                                                                                                                                                                                                                                                                                                                                                                                                                                                                     |
|---------------------------------|----------------------------------------------------------------------------------------------------------------------------------------------------------------------------------------------------------------------------------------------------------------------------------------------------------------------------------------------------------------------------------------------------------------------------------------------------------------------------------------------------------------------------------------------------------------------------------------------------------------------------------------------------------------------------------------------------------------------------------------------------------------------------------------------|
| Brugge (1999)                   | Brugge, Roger, Weather Diary, Dec 1999 <a href="http://www.met.reading.ac.uk/~brugge/diary1999.html#1299">www.met.reading.ac.uk/~brugge/diary1999.html#1299</a><br>*-3 people killed as tree blown down in Kings Heath, Birmingham                                                                                                                                                                                                                                                                                                                                                                                                                                                                                                                                                           |
| Kristeligt Dagblad (1999)       | Kristeligt Dagblad, Orkan haergede landet over. Paa vestkysten naede vindstyrken op pa 47 sekundmeter, 4Dec1999 00:00<br>-tree toppled onto electricity mast that fell on man                                                                                                                                                                                                                                                                                                                                                                                                                                                                                                                                                                                                                |
| Lloyds Casualty Week (19991217) | Lloyds Casualty Week, vol318, No12, 17Dec1999<br>-6 fishermen killed when Sniegs fishing boat overturned by large wave<br>-2 woman and man killed in 3 separate car accidents in Denmark<br>-another woman killed by debris from roof Denmark<br>-3 people in Birmingham killed by tree falling on vehicles<br>-hospitals Denmark treated many injuries<br>-6 people killed and many injured in country's most severe storm of century during yesterday afternoon to early hours Dec 4<br>-weekend storms left at least 17 dead and scores injured across N Europe<br>-7 people killed Denmark<br>- cargo aircraft Ilyushin-114 crashed on takeoff at Domodedomo airport in SE Moscow at around 0200UTC (0500local); 5/7 crew killed; Itar-Tass said it was due to engine fire or HIGH WINDS |
| RWS (1999)                      | RWS, Verslag van de Stormvloed van 3 en 4 december 1999 (SR79), Ministerie van Verkeer en Waterstaat, Directoraat-Generaal Rijkswaterstaat, Rijksinstituut voor Kust en Zee, Stormvloedwaarschuwingsdienst, Postbus 20907, 2500EX 's-Gravenhage, 's-Gravenhage, december 1999.                                                                                                                                                                                                                                                                                                                                                                                                                                                                                                               |

|                                              |                                                                                                                                                                                                                                                                                                                                                                                                                                                                                                                                                     |
|----------------------------------------------|-----------------------------------------------------------------------------------------------------------------------------------------------------------------------------------------------------------------------------------------------------------------------------------------------------------------------------------------------------------------------------------------------------------------------------------------------------------------------------------------------------------------------------------------------------|
|                                              | -30 fatalities across Europe                                                                                                                                                                                                                                                                                                                                                                                                                                                                                                                        |
| Vedin and Alexandersson (1999)               | Vedin, Haldo and Hans Alexandersson, Aarhunderadets storm? Vaader och Vatten, p.18, Dec, 1999<br>-one fatality Sweden                                                                                                                                                                                                                                                                                                                                                                                                                               |
| Beredskapsstyrelsen Udviklingsenheden (2000) | Beredskapsstyrelsen Udviklingsenheden, Den Samlede redningsbredsabssektors opgavelosning i forbindelse med orkanen d. 3.-4. december og stormen d. 17 december 1999 - En Tvaergaende evaluering og erfaringsopsamling. Februar 2000, Beredskapsstyrelsen, Beredskabsudviklingsenheden, Datavej 16, 3460 Birkerød, Telefon: 4590 6000, Telefax: 4590 6060, E-mail: bue@brs.dk, Internet: www.brs.dk<br>-7 fatalities during hurricane; almost all fatalities on roads, most associated with fallen trees<br>-833 injuries requiring hospitalization  |
| UN/ECE (2000)                                | UN/ECE Timber Committee, Chapter 3. Effects of the December 1999 storms on European timber markets, ECE/FAO Forest Products Annual Market Review, 1999-2000, 15pp, 2000, Timber Bulletin, Vol LIII, ECE/TIM/BULL/53/3 [pdf document properties: title=3stormdamageFIN.PDF; author=najera; datestamp=15/08/2000] <a href="https://www.unece.org/fileadmin/DAM/timber/docs/rev-00/rev00.htm">https://www.unece.org/fileadmin/DAM/timber/docs/rev-00/rev00.htm</a><br>-100 fatalities from 3 storms; 19 fatalities in Germany recovering fallen timber |
| DWD (20020528)                               | DWD, Orkantief 'Anatol' von 3./4. Dezember 1999 (5pp), <a href="https://www.dwd.de/DE/leistungen/besondereereignisse/stuerme/19991204_orkantief_anatol.pdf">https://www.dwd.de/DE/leistungen/besondereereignisse/stuerme/19991204_orkantief_anatol.pdf</a> [pdf document properties: datestamp: 28May2002]<br>- 'Das Orkantief ‚Anatol‘ war in Dänemark, wo besonders hohe Schäden und zahlreiche Menschenopfer zu beklagen waren'                                                                                                                  |
| Munich Re (2002)                             | Munich Re, Winter Storms in Europe (II), Analysis of 1999 losses and loss potentials, Muenchener Rueck, Munich Re Group, 76pp, 2002<br>->20 fatalities                                                                                                                                                                                                                                                                                                                                                                                              |
| Tatge (2009)                                 | Tatge, Yoern, Looking back, looking forward: Anatol, Lothar and Martin ten years later, 09Dec2009. <a href="https://www.air-worldwide.com/publications/air-currents/looking-back-looking-forward-anatol-lothar-and-martin-ten-years-later/">https://www.air-worldwide.com/publications/air-currents/looking-back-looking-forward-anatol-lothar-and-martin-ten-years-later/</a><br>-20 people killed; 160 people killed in Anatol+Lothar+Martin                                                                                                      |
| Humbling (2013)                              | Humbling David, Weatherwatch: Our severe gales are not hurricanes, but they can be as deadly, The Guardian, 13Dec2013<br>->100 deaths during 3 storm sequence of Dec2013                                                                                                                                                                                                                                                                                                                                                                            |
| Thejournal.ie (20151214)                     | thejournal.ie, The deadliest storms to evr hit Europe, 14Dec2015 0610AM, <a href="https://www.thejournal.ie/europe-storms-2497164-Dec2015/">https://www.thejournal.ie/europe-storms-2497164-Dec2015/</a> , accessed 10Dec2020<br>-20 fatalities give for storm Anatol                                                                                                                                                                                                                                                                               |
| Cappelen et al (2018d)                       | Cappelen J, S Olufsen, MH Ribergaard, JW Nielsen, T Schmith, H Hansen, Dagen derpa, updated 25Jun2018d, <a href="https://www.dmi.dk/vejr-og-atmosfare/temaforside-decemberorkanen-1999/dagen-derpaa/">https://www.dmi.dk/vejr-og-atmosfare/temaforside-decemberorkanen-1999/dagen-derpaa/</a><br>-7 deaths Denmark; >800 injured requiring doctor attention                                                                                                                                                                                         |
| Capellen (2019)                              | Capellen, John, Orkaner paa vore breddegrader, updated 8Jan2019 <a href="https://www.dmi.dk/vejr-og-atmosfare/temaforside-vind/orkaner-paa-vore-breddegrader/">https://www.dmi.dk/vejr-og-atmosfare/temaforside-vind/orkaner-paa-vore-breddegrader/</a> . (webapage downloaded 12Oct2020)<br>-across country 7killed, 800 injured & hospitalized                                                                                                                                                                                                    |

Table SL43. Coastal flooding, dike breaks, and evacuations (arranged by year and then alphabetically)

| Source                                       | Full Reference and Notes                                                                                                                                                                                                                                                                                                                                                                                                                                                                             |
|----------------------------------------------|------------------------------------------------------------------------------------------------------------------------------------------------------------------------------------------------------------------------------------------------------------------------------------------------------------------------------------------------------------------------------------------------------------------------------------------------------------------------------------------------------|
| Kristeligt Dagblad (1999)                    | Kristeligt Dagblad, Orkan haergede landet over. Paa vestkysten naede vindstyrken op pa 47 sekundmeter, 4Dec1999 00:00<br>-Esbjerg harbour area flooded                                                                                                                                                                                                                                                                                                                                               |
| Lloyds Casualty Week (19991217)              | Lloyds Casualty Week, vol318, No12, 17Dec1999<br>-on Denmark west coast, people in many low-lying areas evacuated as coast water levels rose > 5m above normal levels<br>-Esbjerg offices and warehouses flooded                                                                                                                                                                                                                                                                                     |
| Beredskapsstyrelsen Udviklingsenheden (2000) | Beredskapsstyrelsen Udviklingsenheden, Den Samlede redningsbredsabssektors opgavelosning i forbindelse med orkanen d. 3.-4. december og stormen d. 17 december 1999 - En Tvaergaende evaluering og erfaringsopsamling. Februar 2000, Beredskapsstyrelsen, Beredskabsudviklingsenheden, Datavej 16, 3460 Birkerød, Telefon: 4590 6000, Telefax: 4590 6060, E-mail: bue@brs.dk, Internet: www.brs.dk<br>-400-500 surge damage cases<br>-people evacuated in Sonderjylland because of damage to 4 dykes |
| Nielsen and Nielsen (2000)                   | Nielsen, Jacob Woge and Nielsen, Mads Hvid, Stormfloden foraarsaget af orkanen den 3. december 1999, Vejret, 82, 8-14, Februar 2000<br>-Mando evacuated<br>-Esbjerg main destruction flooding of harbour area<br>-Juvre dyke north of Romo broke through in several places over a km stretch<br>-significant numbers of animals drowned<br>-newly restored route on the dam from mainland to Romo partly destroyed on north side                                                                     |
| Schroevens et al (2007)                      | Schroevens M, J Dekker, R Groenendaal, H Peters, Inventory wave data for model calibration, Rijksinstituut voor Kust en Zee, Rijkswaterstaat, July, 2007 [pdf timestamp 07Jan2016]<br>-mainland dike break between Mano and Romo islands<br>-dike break on lee side of Romo island from back flow effect                                                                                                                                                                                             |
| Danhostel-Ribe (2013)                        | Danhostel-Ribe, Sturmfluten, <a href="https://web.archive.org/web/20131215125955/http://www.danhostel-ribe.dk/de/sturmfluten">https://web.archive.org/web/20131215125955/http://www.danhostel-ribe.dk/de/sturmfluten</a> , accessed 25Apr2021<br>-dike breaks at Resby and Juvredeich                                                                                                                                                                                                                |
| Ge et al (2014)                              | Ge J, D Much, J Kappenberg, O Nino, P Ding, Z Chen, Simulating storm flooding maps over Hafencity under present and sea level rise scenarios, Journal of Flood Risk Management, 7, 319-331, 2014.<br>-parts of Hafencity not behind 7.5m Elbe Dyke and flooded                                                                                                                                                                                                                                       |
| Wikipedia (20210418)                         | Wikipedia, Orkan Anatol, <a href="https://de.wikipedia.org/wiki/Orkan_Anatol">https://de.wikipedia.org/wiki/Orkan_Anatol</a> , accessed 18Apr2021<br>-flooding at Romo                                                                                                                                                                                                                                                                                                                               |

Table SL44. Coastal dike heights and protection levels (arranged by year and then alphabetically)

| Source                 | Full Reference and Notes                                                                                                                                                                                                                                                                                                                                                                                                                                                                                                                                                                                                                                                                                                                             |
|------------------------|------------------------------------------------------------------------------------------------------------------------------------------------------------------------------------------------------------------------------------------------------------------------------------------------------------------------------------------------------------------------------------------------------------------------------------------------------------------------------------------------------------------------------------------------------------------------------------------------------------------------------------------------------------------------------------------------------------------------------------------------------|
| Mueller-Navarra (2005) | Mueller-Navarra, Sylvin, Sturmfluten. Land under an Nord- und Ostsee, in: Entfesselte Elemente-Der Mensch und die Kraefte der Natur, 5, 92-99, Guetersloh. Wissen-Media-Verl., 2005<br>-Hamburg dike heights at 5.4-5.8mNN in 1962 during surge disaster.                                                                                                                                                                                                                                                                                                                                                                                                                                                                                            |
| Von Storch (2008)      | von Storch, Hans and Katja Woth, Storm surges: perspectives and options, Sustain Sci, 3, 33-43, 2008<br>-history of Hamburg dike heights and surges<br>-before 1825 dyke failure at NN+5.20m<br>-after 1825 dyke heights raised to NN+5.70m<br>-after 1962 dyke heights raised to NN+7.20m<br>-after 1976 dyke heights raised to NN+8.0m and then NN+9.30m<br>-since 1962 several storm surges to the NN+5.50m to NN+6.00m                                                                                                                                                                                                                                                                                                                           |
| Herrling et al (2010)  | Herrling Gerald, Heiko Knaack, Ralf Kaiser, Hanz D. Niemayer, Evaluation of design water levels at the Ems-Dollard estuary considering the effect of a storm surge barrier, 32nd Conference on Coastal Engineering 2010, Shanghai, China, 30Jun-05Jul2020. ed by JM Smith and P Lynett, pp. 3899-3917, [pdf document properties: title=ICCE2020_Ems_final, datestamp=15Sep2010<br>-Design water levels Emden revised upward to 6.39 mNN in Lower Saxon Dike act<br>-FIG10. Determination of the highest expected high water level at Emden with an open storm surge barrier by Single value method (Luders & Leis 1964) & in compliance with Lower Saxon Dyke Act.<br>-based on highest known surge setup from 1906 event; 50cm sea level rise added |
| Danhostel-Ribe (2013)  | Danhostel-Ribe, Sturmfluten, <a href="https://web.archive.org/web/20131215125955/http://www.danhostel-ribe.dk/de/sturmfluten">https://web.archive.org/web/20131215125955/http://www.danhostel-ribe.dk/de/sturmfluten</a> , accessed 25Apr2021<br>-Ribe dike 7.0m during storm Anatol and was almost overtopped when water level+waves reached 6.70m<br>-dike heights at Ballum are 4.0m; lowest along coast<br>-description of dike structure with sand core for drainage & shallow angle front to dissipate wave energy                                                                                                                                                                                                                             |
| Ge et al (2014)        | Ge J, D Much, J Kappenberg, O Nino, P Ding, Z Chen, Simulating storm flooding maps over Hafencity under present and sea level rise scenarios, Journal of Flood Risk Management, 7, 319-331, 2014.<br>-Elbe dike is 7.5m high in Hamburg and prevents flooding of hinterlands                                                                                                                                                                                                                                                                                                                                                                                                                                                                         |

Table SL45. Surge barrier closures (arranged by year and then alphabetically)

| Source                    | Full Reference and Notes                                                                                                                                                                                                                                                                                                                                                                                                                       |
|---------------------------|------------------------------------------------------------------------------------------------------------------------------------------------------------------------------------------------------------------------------------------------------------------------------------------------------------------------------------------------------------------------------------------------------------------------------------------------|
| RWS (1999)                | RWS, Verslag van de Stormvloed van 3 en 4 december 1999 (SR79), Ministerie van Verkeer en Waterstaat, Directoraat-Generaal Rijkswaterstaat, Rijksinstituut voor Kust en Zee, Stormvloedwaarschuwingsdienst, Postbus 20907, 2500EX 's-Gravenhage, 's-Gravenhage, december 1999.<br>*-during storm passage storm surge barrier in the Hollandse IJssel closed                                                                                    |
| Environment Agency (2012) | Environment Agency, Thames Barrier Project Pack 2012, time stamp Nov. 24, 2011<br>-Thames Barrier closed hydraulically at 2200 GMT<br>-vigorous depression across North Sea with strong northerly winds<br>-measured tide running well above forecast<br>-maximum level at Southend 3.43m (ODN?) with a surge at high water of 0.96m (skew surge) and a maximum surge of 1.39 m (true surge)<br>-Thames Barrier main gates reopened at 2315GMT |
| Environment Agency (2018) | Environment Agency, Thames Barrier Project Pack, January, 2018<br>-as for Environment Agency (2012)                                                                                                                                                                                                                                                                                                                                            |

Table SL46. Beach damage and coastal issues; salt water contamination of groundwater; sewer systems (arranged by year and then alphabetically)

| Source                                       | Full Reference and Notes                                                                                                                                                                                                                                                                                                                                                                                                                                                                                                    |
|----------------------------------------------|-----------------------------------------------------------------------------------------------------------------------------------------------------------------------------------------------------------------------------------------------------------------------------------------------------------------------------------------------------------------------------------------------------------------------------------------------------------------------------------------------------------------------------|
| Focus (1999)                                 | Focus, Strandfresser Anatol, Nr.50, 1999 (correspondent Birte Siedenburger), <a href="https://www.focus.de/politik/deutschland/sylt-strandfresser-anatol_aid_178994.html">https://www.focus.de/politik/deutschland/sylt-strandfresser-anatol_aid_178994.html</a><br>-in only one night Sylt lost 1.4 million m3 of sand; more than in full year<br>-ocean took all sand laid down in beach protection scheme the for 9.5 million DM<br>-also on south point of island near Hoernum and Lister Ellenbogen beach scraped away |
| Beredskapsstyrelsen Udviklingsenheden (2000) | Beredskapsstyrelsen Udviklingsenheden, Den Samlede redningsberedskabssektors opgavelosning i forbindelse med orkanen d. 3.-4. december og stormen d. 17 december 1999 - En Tvaergaende evaluering og erfaringsopsamling. Februar 2000, Beredskapsstyrelsen, Beredskabsudviklingsenheden, Datavej 16, 3460 Birkerød, Telefon: 4590 6000, Telefax: 4590 6060, E-mail: bue@brs.dk, Internet: www.brs.dk<br>-broken dykes in Sonder-Jylland                                                                                     |
| Nielsen and Nielsen (2000)                   | Nielsen, Jacob Woge and Nielsen, Mads Hvid, Stormfloden foraarsaget af orkanen den 3. december 1999, Vejret, 82, 8-14, Februar 2000<br>-Juvre dyke north of Romo broke through in several places over a km stretch<br>-newly restored route on the dam from mainland to Romo partly destroyed on north side<br>-building debris from Mando scattered over dyke by waves                                                                                                                                                     |

Table SL47. Power interruptions (arranged by year and then alphabetically)

| Source                    | Full Reference and Notes                                                                                                                                                                                                               |
|---------------------------|----------------------------------------------------------------------------------------------------------------------------------------------------------------------------------------------------------------------------------------|
| Kristeligt Dagblad (1999) | Kristeligt Dagblad, Orkan haergede landet over. Paa vestkysten naede vindstyrken op pa 47 sekundmeter, 4Dec1999 00:00<br>-cases of electricity masts blown down<br>-Esbjerg & Varde alarm center out of action because of power outage |
| Lloyds Casualty Week      | Lloyds Casualty Week, vol318, No12, 17Dec1999                                                                                                                                                                                          |

|                                              |                                                                                                                                                                                                                                                                                                                                                                                                                                                                                                                                                                                                                                                                                                                                                                    |
|----------------------------------------------|--------------------------------------------------------------------------------------------------------------------------------------------------------------------------------------------------------------------------------------------------------------------------------------------------------------------------------------------------------------------------------------------------------------------------------------------------------------------------------------------------------------------------------------------------------------------------------------------------------------------------------------------------------------------------------------------------------------------------------------------------------------------|
| (19991217)                                   | -Lithuania Klaipeda 100,000 people left without power after strong winds damaged transmission lines<br>-Latvia: several hundred homes without power in western areas<br>-power blackouts and flooding in many parts of Denmark<br>-power blackouts reported in many parts of Denmark<br>-electricity blackouts occurred in many areas of Denmark; torn power lines set off 400 fires<br>-power cut: parts of Schleswig-Holstein & North Sea islands of Sylt and Amrum                                                                                                                                                                                                                                                                                              |
| Vedin and Alexandersson (1999)               | Vedin, Haldo and Hans Alexandersson, Aarhunderadets storm? Vaader och Vatten, p.18, Dec, 1999<br>-long duration power cuts for at most 100000 customers (Sweden)                                                                                                                                                                                                                                                                                                                                                                                                                                                                                                                                                                                                   |
| Beredskapsstyrelsen Udviklingsenheden (2000) | Beredskapsstyrelsen Udviklingsenheden, Den Samlede redningsberedskabssektors opgaveløsning i forbindelse med orkanen d. 3.-4. december og stormen d. 17 december 1999 - En Tvaergaende evaluering og erfaringsopsamling. Februar 2000, Beredskapsstyrelsen, Beredskabsudviklingsenheden, Datavej 16, 3460 Birkerød, Telefon: 4590 6000, Telefax: 4590 6060, E-mail: bue@brs.dk, Internet: www.brs.dk<br>-400,000 households without electricity                                                                                                                                                                                                                                                                                                                    |
| Neckelmann and Petersen (2000)               | Neckelmann, S. and J. Petersen, Evaluation of the stand-alone wind and wave measurement systems for Horns Rev 150MW offshore wind farm in Denmark, OWEMES 2000, ATENA, Rome, Sicily, pp.17-27, 2000<br>-10 day power outage for most instruments at Horns Rev because waves hit junction box shed and forced out power cables                                                                                                                                                                                                                                                                                                                                                                                                                                      |
| Rosenorn (2000)                              | Rosenorn, Af Stig, De kraftigste storme i det tyvende aarhundrede in Denmark, Vejret, 82, 15-18, Februar 2000<br>-Romo and Ribe met stations had a power cut of several hours so highest gusts not known                                                                                                                                                                                                                                                                                                                                                                                                                                                                                                                                                           |
| Munich Re (2002)                             | Munich Re, Winter Storms in Europe (II), Analysis of 1999 losses and loss potentials, Muenchener Rueck, Munich Re Group, 76pp, 2002<br>-165000 households without power due to major damage of overhead line network (Denmark, Sweden)                                                                                                                                                                                                                                                                                                                                                                                                                                                                                                                             |
| Tatge (2009)                                 | Tatge, Yoern, Looking back, looking forward: Anatol, Lothar and Martin ten years later, 09Dec2009. <a href="https://www.air-worldwide.com/publications/air-currents/looking-back-looking-forward-anatol-lothar-and-martin-ten-years-later/">https://www.air-worldwide.com/publications/air-currents/looking-back-looking-forward-anatol-lothar-and-martin-ten-years-later/</a><br>-large scale power interruptions specifically mentioned for Martin but not Anatol or Lothar<br>-Lothar+Martin: electricity: 1/4 France high tension transmission lines lost & 300 high voltage pylons toppled<br>-one of greatest energy disruptions ever experienced by a modern developed country<br>-10 mill people across France & Germany without power at height of winter |
| Sieber (2012)                                | Sieber, Jeanette, Impacts of extreme hydro-meteorological events on electricity generation and possible adaptation measures. A GIS-based approach for corporate risk management and enhanced climate mitigation concepts in Germany. Ph.D. thesis, Julius-Maximilians-Universitaet Wuerzburg - Institut fuer Geographie, Karlsruhe, November 2012<br>-electricity supply to 165000 households failed<br>-summary of storm 1999-2010 with important energy impacts Europe                                                                                                                                                                                                                                                                                           |
| Humbling (2013)                              | Humbling David, Weatherwatch: Our severe gales are not hurricanes, but they can be as deadly, The Guardian, 13Dec2013<br>-3 million people without electricity during 3 storms of Dec1999                                                                                                                                                                                                                                                                                                                                                                                                                                                                                                                                                                          |
| Danish Energy Agency (2015)                  | Danish Energy Agency, Security of Electricity Supply in Denmark, 1st edition 2015, translated 2016, Danish Energy Agency, Amaliegade 44, 1256 Copenhagen K, ISBN 978-87-93180-15-4<br>-approx 440000 households lost electricity in worst hurricane of century.                                                                                                                                                                                                                                                                                                                                                                                                                                                                                                    |
| Cappelen et al (2018d)                       | Cappelen J, S Olufsen, MH Ribergaard, JW Nielsen, T Schmith, H Hansen, Dagen derpaa, updated 25Jun2018d, <a href="https://www.dmi.dk/vejr-og-atmosfare/temaforside-decemberorkanen-1999/dagen-derpaa/">https://www.dmi.dk/vejr-og-atmosfare/temaforside-decemberorkanen-1999/dagen-derpaa/</a><br>-electricity masts suffered during the storm<br>-fallen power cables caused 200 fires across the country<br>-several thousand customers had experience the December hurricane & days afterward without power<br>-20000 people in nordsjaelland spent week in winter darkness                                                                                                                                                                                     |
| Air Worldwide (20191219)                     | Air Worldwide, Three severe storms together were a wake-up call, 19Dec2019.<br>-France 25% high tension lines lost; 300 transmission pylons toppled<br>-one of greatest energy disruptions for modern developed country                                                                                                                                                                                                                                                                                                                                                                                                                                                                                                                                            |
| Capellen (2019)                              | Capellen, John, Orkaner paa vore breddegrader, updated 8Jan2019 <a href="https://www.dmi.dk/vejr-og-atmosfare/temaforside-vind/orkaner-paa-vore-breddegrader/">https://www.dmi.dk/vejr-og-atmosfare/temaforside-vind/orkaner-paa-vore-breddegrader/</a> , (webapage downloaded 12Oct2020)<br>-fallen electricity cables caused >200 fires<br>-Nordsjaelland 20000 people without electricity for entire week<br>-train traffic partly stopped for several days                                                                                                                                                                                                                                                                                                     |

Table SL48. List bridge closures, cancelled ferry crossings, port closures, airport cancel, rail interruptions, traffic accidents (arranged by year and then alphabetically)

| Source                           | Full Reference and Notes                                                                                                                                                                                                                                                                                                                                                    |
|----------------------------------|-----------------------------------------------------------------------------------------------------------------------------------------------------------------------------------------------------------------------------------------------------------------------------------------------------------------------------------------------------------------------------|
| Brugge (1999)                    | Brugge, Roger, Weather Diary, Dec 1999, <a href="http://www.met.reading.ac.uk/~brugge/diary1999.html#1299">www.met.reading.ac.uk/~brugge/diary1999.html#1299</a><br>-strong gusts led to many blocked roads with fallen debris and overturned lorries Scotland<br>-road restrictions imposed in exposed areas as far S as Cheshire and Derbyshire<br>-A65 flooded at Settle |
| Focus (1999)                     | Focus, Strandfresser Anatol, Nr.50, 1999 (correspondent Birte Siedenburg), <a href="https://www.focus.de/politik/deutschland/sylt-strandfresser-anatol_aid_178994.html">https://www.focus.de/politik/deutschland/sylt-strandfresser-anatol_aid_178994.html</a><br>-Sylt car train service interrupted for 6h at Hindenburgdamm                                              |
| Kristeligt Dagblad (1999)        | Kristeligt Dagblad, Orkan haergede landet over. Paa vestkysten naede vindstyrken op pa 47 sekundmeter, 4Dec1999 00:00<br>-early in the afternoon Storebaeltsbroen was closed<br>-most ferry routes stopped, flights grounded                                                                                                                                                |
| Lloyd's Casualty Week (19991217) | Lloyds Casualty Week, vol318, No12, 17Dec1999<br>-storm forced closure of Latvia's Ventspils port and Lithuania Klaipeda port<br>-storm forced closure of Latvia's 3 main ports, which re-opened early today<br>-Denmark: trains, city buses, ferries stopped running; road auth closed bridges                                                                             |

|                        |                                                                                                                                                                                                                                                                                                                                                                                                                                                                                                                                                                                                                                                                                                                                                                                                                                                                                                                                                                                                                                                                                                                                                                                                                                                                                                                                                                                                                                       |
|------------------------|---------------------------------------------------------------------------------------------------------------------------------------------------------------------------------------------------------------------------------------------------------------------------------------------------------------------------------------------------------------------------------------------------------------------------------------------------------------------------------------------------------------------------------------------------------------------------------------------------------------------------------------------------------------------------------------------------------------------------------------------------------------------------------------------------------------------------------------------------------------------------------------------------------------------------------------------------------------------------------------------------------------------------------------------------------------------------------------------------------------------------------------------------------------------------------------------------------------------------------------------------------------------------------------------------------------------------------------------------------------------------------------------------------------------------------------|
|                        | <ul style="list-style-type: none"> <li>-Denmark: lorries toppled by strong winds blocking some highways</li> <li>-Denmark: airports including Copenhagen international closed</li> <li>-rain, snow and high winds caused serious travel problems Scotland</li> <li>-Denmark: trains, city buses, ferries ceased running</li> <li>-Denmark: road authorities closed bridges across major waterways</li> <li>-Denmark: dozens of lorries toppled &amp; blocked highways</li> <li>-Denmark: airports and Copenhagen international closed</li> <li>-Denmark: air, ferry, rail and road traffic resumed gradually this morning &amp; bridges over major waterway re-opened</li> <li>-Denmark: thousands of people stranded as airports closed and train/bus services suspended</li> <li>-Denmark: winds: DMI meas up to 180km/h toppled dozens of lorries, closing highways</li> <li>-Denmark: thousands of fallen trees hampered traffic across country</li> <li>*-no major damage to port or vessels in Hamburg</li> <li>-Poland: rail service between Warsaw and Baltic cities of Szczecin and Gdansk cut by falling trees</li> <li>-Sweden: storms halted traffic at airports and ferry terminals</li> <li>-Moscow, Dec5: Reuters: cargo aircraft Ilyushin-114 crashed on takeoff at Domodedovo airport in SE Moscow at around 0200UTC (0500local); 5/7 crew killed; Itar-Tass said it was due to engine fire or HIGH WINDS</li> </ul> |
| Capellen (2019)        | <p>Capellen, John, Orkaner paa vore breddegrader, updated 8Jan2019 <a href="https://www.dmi.dk/vejr-og-atmosfare/temaforside-vind/orkaner-paa-vore-breddegrader/">https://www.dmi.dk/vejr-og-atmosfare/temaforside-vind/orkaner-paa-vore-breddegrader/</a>, (webpage downloaded 12Oct2020)</p> <ul style="list-style-type: none"> <li>-train traffic partly stopped for several days</li> </ul>                                                                                                                                                                                                                                                                                                                                                                                                                                                                                                                                                                                                                                                                                                                                                                                                                                                                                                                                                                                                                                       |
| Cappelen et al (2018d) | <p>Cappelen J, S Olufsen, MH Ribergaard, JW Nielsen, T Schmith, H Hansen, Dagen derpa, updated 25Jun2018d, <a href="https://www.dmi.dk/vejr-og-atmosfare/temaforside-decemberorkanen-1999/dagen-derpaa/">https://www.dmi.dk/vejr-og-atmosfare/temaforside-decemberorkanen-1999/dagen-derpaa/</a></p> <ul style="list-style-type: none"> <li>-fallen trees paralyze rail network dor several days</li> <li>-trees block secondary roads</li> </ul>                                                                                                                                                                                                                                                                                                                                                                                                                                                                                                                                                                                                                                                                                                                                                                                                                                                                                                                                                                                     |

Table SL49. Structural damage to wind farms and wind energy impacts (arranged by year and then alphabetically)

| Source                        | Full Reference and Notes                                                                                                                                                                                                                                                                                                                                                                                                                                                                                                                                                                                                                                                       |
|-------------------------------|--------------------------------------------------------------------------------------------------------------------------------------------------------------------------------------------------------------------------------------------------------------------------------------------------------------------------------------------------------------------------------------------------------------------------------------------------------------------------------------------------------------------------------------------------------------------------------------------------------------------------------------------------------------------------------|
| Sommer (2002)                 | <p>Sommer A, Wind Resources at Horns Rev, Eltra PSO-2000 Proj nr. EG-05 3248, Tech-wise, 2002.</p> <ul style="list-style-type: none"> <li>-wave strike during Anatol disabled Horns Rev primary measurement system for 10days</li> </ul>                                                                                                                                                                                                                                                                                                                                                                                                                                       |
| Fehrmann and Fackler (2010)   | <p>Fehrmann, A. and A. Fackler, Offshore wind farms: risk and initial loss experience, Temple Insurance, a member of the Munich Re Group, 2010 [PDF timestamp: 09Mar2010] (last date reference 2001; last incident reference 2003)</p> <ul style="list-style-type: none"> <li>-13 older wind turbines destroyed in Denmark out of 3500 onshore turbines in operation at time of storm.</li> </ul>                                                                                                                                                                                                                                                                              |
| Caithness Windfarm (20180730) | <p>Caithness Windfarm, craigrd, Detailed accidents to 19 June 2018. Document time stamp 30/07/2018, 177pp Wind turbine accident compilation (start 30Nov1980) [Storm Anatol 1999 reports]</p> <ul style="list-style-type: none"> <li>-blade failure, Sievern-Langdon, Kreis Cuxhaven, 3Dec1999</li> <li>-structural failure, Bochlolt-Hemden, 3Dec1999</li> <li>-structural failure Jutland, 3Dec1999</li> <li>-blade failure, Zennhusen, 3 Dec 1999 (lightning)</li> <li>-blade failure, Westermarsch II, Norddeich, Niedersachsen (4Dec1999)</li> <li>-structural failure, Eemshaven 9Dec1999</li> <li>-structural failure, Lichtenau-Asseln, Nordrhein-Westfalen</li> </ul> |
| Buchana and McSharry (2019)   | <p>Buchana P, PR McSharry, Windstorm risk assessment for offshore wind farms in the North Sea, Wind Energy, 22, 1219-1229, 2019</p> <ul style="list-style-type: none"> <li>-no mention of offshore or onshore wind turbine damage during storm Anatol</li> <li>-Anatol-Lothar-Martin mentioned as defining destructive storms in Europe as late as 2019</li> </ul>                                                                                                                                                                                                                                                                                                             |

Table SL50. Hydropower impacts (arranged by year and then alphabetically)

| Source | Full Reference and Notes |
|--------|--------------------------|
|        |                          |

Table SL51. Structural damage to buildings, piers, and cultural monuments (arranged by year and then alphabetically)

| Source                          | Full Reference and Notes                                                                                                                                                                                                                                                                                                                                                                                                                                                                                                                                                                                                                                                                                                                                                                                                                                                                                                                                                                                                                                                                                                                         |
|---------------------------------|--------------------------------------------------------------------------------------------------------------------------------------------------------------------------------------------------------------------------------------------------------------------------------------------------------------------------------------------------------------------------------------------------------------------------------------------------------------------------------------------------------------------------------------------------------------------------------------------------------------------------------------------------------------------------------------------------------------------------------------------------------------------------------------------------------------------------------------------------------------------------------------------------------------------------------------------------------------------------------------------------------------------------------------------------------------------------------------------------------------------------------------------------|
| Focus (1999)                    | <p>Focus, Strandfresser Anatol, Nr.50, 1999 (correspondent Birte Siedenborg), <a href="https://www.focus.de/politik/deutschland/sylt-strandfresser-anatol_aid_178994.html">https://www.focus.de/politik/deutschland/sylt-strandfresser-anatol_aid_178994.html</a></p> <ul style="list-style-type: none"> <li>-70% of houses damaged at Westerland</li> <li>-mobile homes destroyed</li> <li>-hundreds of roofs damaged</li> </ul>                                                                                                                                                                                                                                                                                                                                                                                                                                                                                                                                                                                                                                                                                                                |
| Kristeligt Dagblad (1999)       | <p>Kristeligt Dagblad, Orkan haergede landet over. Paa vestkysten naede vindstyrken op pa 47 sekundmeter, 4Dec1999 00:00</p> <ul style="list-style-type: none"> <li>-deroofed houses</li> <li>-Tonder: police station de-roofed</li> </ul>                                                                                                                                                                                                                                                                                                                                                                                                                                                                                                                                                                                                                                                                                                                                                                                                                                                                                                       |
| Lloyds Casualty Week (19991217) | <p>Lloyds Casualty Week, vol318, No12, 17Dec1999</p> <ul style="list-style-type: none"> <li>-Denmark: storm uprooted trees and ripped roofs off many buildings</li> <li>-Denmark: material damage from heavy rains and gale winds estimate to exceed 1bill kronur (Danish Insurance Information Service)</li> <li>-Danish rescue officials logged &gt;4000 reports of damage to buildings, mainly shattered windows and torn off roofs</li> <li>-Poland: 105m crane capable of lifting 900t toppled into sea at Gydnia shipyard</li> <li>-Poland: strong winds in Baltic region toppled one of world's largest gantry cranes, the 900tonne Kone crane at Gydnia Shipyard in Poland early hours of Dec4</li> <li>-Poland: winds gusting up to 170km/h too strong for heavy steel hawsers to secure crane for gales; collapse caused damage to Drydock no 2; crane spanned 70m wide drydock</li> <li>-Odense shipyard: 3000ton crane toppled over vessel being built (Friday evening Dec3); 2000 workers sent home</li> <li>-heavy crane at Lindoe shipyard fell onto new building YARD No.170 (Danish container vessel 91560gt) in dry</li> </ul> |



|                              |                                                                                                                                                                                                                                                                                                                                                                                                                                                                                                                             |
|------------------------------|-----------------------------------------------------------------------------------------------------------------------------------------------------------------------------------------------------------------------------------------------------------------------------------------------------------------------------------------------------------------------------------------------------------------------------------------------------------------------------------------------------------------------------|
|                              | dock; crane seriously damaged; ship with minor damage<br>-hurricane did considerable damage to constructions, roofs, forests, etc<br>-Lindoe shipyard Odense, heavy crane collapsed on newbuilding Yard No.170; damage estimated at 2 million DKK                                                                                                                                                                                                                                                                           |
| Mann and Hansen (2000)       | Mann AJ, SO Hansen, En storm gor ingen norm, Vejret, no1. 22.Argang, 82, pp.28-34, Februar 2000.<br>-roof tile and side cladding damage during Storm Anatol should have been within Danish construction standards.                                                                                                                                                                                                                                                                                                          |
| Munich Re (2002)             | Munich Re, Winter Storms in Europe (II), Analysis of 1999 losses and loss potentials, Muenchener Rueck, Munich Re Group, 76pp, 2002<br>-main damage: roofs, facades, vehicles, boats, scaffolding                                                                                                                                                                                                                                                                                                                           |
| Mueller-Navarra et al (2003) | Mueller-Navarra SH, W Lang, S Dick, KC Soetje, Ueber de Verfahren der Wasserstands- und Stormflutvorhersage. Hydrodynamisch-numerische Modelle der Nord- und Ostsee und ein empirisch-statistisches Verfahren fuer die Deutsche Bucht, promet. Jahrg. 29, Nr 1-4, 117-124, June 2003<br>-damage to buildings in southern Jutland                                                                                                                                                                                            |
| Tatge (2009)                 | Tatge, Yoern, Looking back, looking forward: Anatol, Lothar and Martin ten years later, 09Dec2009.<br><a href="https://www.air-worldwide.com/publications/air-currents/looking-back-looking-forward-anatol-lothar-and-martin-ten-years-later/">https://www.air-worldwide.com/publications/air-currents/looking-back-looking-forward-anatol-lothar-and-martin-ten-years-later/</a><br>-photos of Anatol damage in Denmark<br>-Lothar+Martin: building: 60% of roofs damaged in the area of Paris; state of emergency in city |
| Danhostel-Ribe (2013)        | Danhostel-Ribe, Sturmfluten, <a href="https://web.archive.org/web/20131215125955/http://www.danhostel-ribe.dk/de/sturmfluten">https://web.archive.org/web/20131215125955/http://www.danhostel-ribe.dk/de/sturmfluten</a> , accessed 25Apr2021<br>-50% of buildings in Ribe damaged; mostly roofs and lost roof tiles                                                                                                                                                                                                        |
| Cappelen et al (2018d)       | Cappelen J, S Olufsen, MH Ribergaard, JW Nielsen, T Schmith, H Hansen, Dagen derpa, updated 25Jun2018d,<br><a href="https://www.dmi.dk/vejr-og-atmosfare/temaforaside-decemberorkanen-1999/dagen-derpaa/">https://www.dmi.dk/vejr-og-atmosfare/temaforaside-decemberorkanen-1999/dagen-derpaa/</a><br>-much roof and house damage                                                                                                                                                                                           |

Table SL52. Forest damage and tree falls (arranged by year and then alphabetically)

| Source                          | Full Reference and Notes                                                                                                                                                                                                                                                                                                                                                                                                                                                                                                                                                                                                                                                                                                                                                                                                                                                                                                                                                                            |
|---------------------------------|-----------------------------------------------------------------------------------------------------------------------------------------------------------------------------------------------------------------------------------------------------------------------------------------------------------------------------------------------------------------------------------------------------------------------------------------------------------------------------------------------------------------------------------------------------------------------------------------------------------------------------------------------------------------------------------------------------------------------------------------------------------------------------------------------------------------------------------------------------------------------------------------------------------------------------------------------------------------------------------------------------|
| Focus (1999)                    | Focus, Strandfresser Anatol, Nr.50, 1999 (correspondent Birte Siedenburger),<br><a href="https://www.focus.de/politik/deutschland/sylt-strandfresser-anatol_aid_178994.html">https://www.focus.de/politik/deutschland/sylt-strandfresser-anatol_aid_178994.html</a><br>-large trees snapped off on Sylt                                                                                                                                                                                                                                                                                                                                                                                                                                                                                                                                                                                                                                                                                             |
| Kristeligt Dagblad (1999)       | Kristeligt Dagblad, Orkan haergede landet over. Paa vestkysten naede vindstyrken op pa 47 sekundmeter, 4Dec1999 00:00<br>-large numbers of toppled trees                                                                                                                                                                                                                                                                                                                                                                                                                                                                                                                                                                                                                                                                                                                                                                                                                                            |
| Lloyds Casualty Week (19991217) | Lloyds Casualty Week, vol318, No12, 17Dec1999<br>-Denmark: storm uprooted trees and ripped roofs off many buildings<br>-3 people killed in 2 vehicles at Kings Heath Birmingham 0940UTC when large tree fell onto traffic<br>-Denmark: thousands of fallen trees hampered traffic across country<br>-Poland: rail service between Warsaw and Baltic cities of Szczecin and Gdansk cut by falling trees<br>-hurricane did considerable damage to constructions, roofs, forests, etc                                                                                                                                                                                                                                                                                                                                                                                                                                                                                                                  |
| RWS (1999)                      | RWS, Verslag van de Stormvloed can 3 en 4 december 1999 (SR79), Ministerie van Verkeer en Waterstaat, Directoraat-Generaal Rijkswaterstaat, Rijksinstituut voor Kust en Zee, Stormvloedwaarschuwingsdienst, Postbus 20907, 2500EX 's-Gravenhage, 's-Gravenhage, december 1999.<br>-Nationale Deene Meteo: 6 million toppled trees 3Dec1999                                                                                                                                                                                                                                                                                                                                                                                                                                                                                                                                                                                                                                                          |
| Vedin and Alexandersson (1999)  | Vedin, Haldo and Hans Alexandersson, Aarhunderadets storm? Vaader och Vatten, p.18, Dec, 1999<br>-over 5 million m3 fallen timber; of which 3 million in N Gotland & S Svealand by storm 29Nov<br>-last time of such windthrow in Sweden was during snowstorm 17Nov1995 when 5 million m3 toppled                                                                                                                                                                                                                                                                                                                                                                                                                                                                                                                                                                                                                                                                                                   |
| Forestry Commission (2000)      | Forestry Commission, Naar skoven blaeser omkuld, Vejret, 85, pp.8-9, Dec, 2000<br>-3Dec1999 southern part of country hit by 100y storms<br>-15000 ha forest destroyed by storm; 3.5 mill m3 tree lay on ground<br>-Dansk Skovforening dedicate January issue of magazine Skoven to the storm                                                                                                                                                                                                                                                                                                                                                                                                                                                                                                                                                                                                                                                                                                        |
| UN/ECE (2000)                   | UN/ECE Timber Committee, Chapter 3. Effects of the December 1999 storms on European timber markets, ECE/FAO Forest Products Annual Market Review, 1999-2000, 15pp, 2000, Timber Bulletin, Vol LIII, ECE/TIM/BULL/53/3 [pdf document properties: title=3stormdamageFIN.PDF; author=najera; datestamp=15/08/2000] <a href="https://www.unece.org/fileadmin/DAM/timber/docs/rev-00/rev00.htm">https://www.unece.org/fileadmin/DAM/timber/docs/rev-00/rev00.htm</a><br>-FIG3.1.1. Windstorm damage in European forests, 1950-1999<br>NOTE: DEC1999 rank1 event<br>(source: Mr. Mart-Jan Schelhaas, Altera, Netherlands, 2000)<br>-fallen timber in Europe storm worst case on record back to 1950; 1999 storm sequence rank2<br>-fatalities in harvesting fallen timber<br>-Anatol: worst impact Denmark, Sweden secondary<br>-Lothar/Martin: heavy preceding rain weakened soil; worst damage France, Germany, Switzerland<br>-part of windthrow loss in France due to changing silviculture practices |
| Munich Re (2002)                | Munich Re, Winter Storms in Europe (II), Analysis of 1999 losses and loss potentials, Muenchener Rueck, Munich Re Group, 76pp, 2002<br>-significant forest damage in Denmark (100-150% of annual harvest) and Sweden (<10% annual harvest)                                                                                                                                                                                                                                                                                                                                                                                                                                                                                                                                                                                                                                                                                                                                                          |
| Mueller-Navarra et al (2003)    | Mueller-Navarra SH, W Lang, S Dick, KC Soetje, Ueber de Verfahren der Wasserstands- und Stormflutvorhersage. Hydrodynamisch-numerische Modelle der Nord- und Ostsee und ein empirisch-statistisches Verfahren fuer die Deutsche Bucht, promet. Jahrg. 29, Nr 1-4, 117-124, June 2003<br>-damage to forests in southern Jutland                                                                                                                                                                                                                                                                                                                                                                                                                                                                                                                                                                                                                                                                      |
| Nilsson et al (2004)            | Nilsson C, I Stjernquist, L Barring, P Schlyter, AM Jonsson, H Samuelsson, Recorded storm damage in Swedish forests 1901-2000, Forest Ecology and Management 1999, 163-173, 2004<br>*-FIG2. Annual total damaged volume expressed as cubic meter over bark Mm3 and the annual total number of forest damaging storms; note break at 7.5mm3 in upper y-axis<br>storms 1999, 1995, 1981                                                                                                                                                                                                                                                                                                                                                                                                                                                                                                                                                                                                               |

|                        |                                                                                                                                                                                                                                                                                                                                                                                                                                                                                                                                                                                                                                                                                                                                                                                                                            |
|------------------------|----------------------------------------------------------------------------------------------------------------------------------------------------------------------------------------------------------------------------------------------------------------------------------------------------------------------------------------------------------------------------------------------------------------------------------------------------------------------------------------------------------------------------------------------------------------------------------------------------------------------------------------------------------------------------------------------------------------------------------------------------------------------------------------------------------------------------|
|                        | -Anatol was most recent severe storm event; previous severe storms 1995, 1981                                                                                                                                                                                                                                                                                                                                                                                                                                                                                                                                                                                                                                                                                                                                              |
| Nilsson et al (2007)   | Nilsson C, S Goyette, L Barring, Relating forest damage data to the wind field from high-resolution RCM simulations: case study of Anatol striking Sweden in December 1999, Global and Planetary Change, 57, 161-176, 2007.<br>-forest damage in Scania; mostly on S and SW facing slopes<br>-forest management practices                                                                                                                                                                                                                                                                                                                                                                                                                                                                                                  |
| Tatge (2009)           | Tatge, Yoern, Looking back, looking forward: Anatol, Lothar and Martin ten years later, 09Dec2009.<br><a href="https://www.air-worldwide.com/publications/air-currents/looking-back-looking-forward-anatol-lothar-and-martin-ten-years-later/">https://www.air-worldwide.com/publications/air-currents/looking-back-looking-forward-anatol-lothar-and-martin-ten-years-later/</a><br>-Lothar+Martin: forests devastated: area level several times average annual yield in France, Germany, Switzerland combined                                                                                                                                                                                                                                                                                                            |
| Gardiner et al (2012)  | Gardiner B, K Blennow, J-M Carnus, P Fleischer, F Ingemarson, G Landmann, M Lindner, M Marzano, B Nicoll, C Orazio, J-L Peyron, M-P Reviron, M-J Schelhaas, A Schuck, M Spielmann, T Usbeck, Destructive storm in European Forests: Past and Forthcoming Impacts, European Forest Institute, Atlantic European Regional Office - EFlAtlantic [pdf document properties: author=Barry Gardiner, datestamp=09Mar2012]<br>*FIG7. Damage as percentage of growing stock for different countries<br>NOTE: for Denmark Anatol was rank3 event since 1950 after 1967 & 1981; low rank for Sweden storm sequence 1999 rank1 event for Europe with 1990 storms rank2;<br>NOTE: 6.5% value for Denmark considered very high; highest values 7% for 1967,1981 storm.<br>-FIG4. Envelope of threshold of damage versus gust wind speed. |
| Danhostel-Ribe (2013)  | Danhostel-Ribe, Sturmfluten, <a href="https://web.archive.org/web/20131215125955/http://www.danhostel-ribe.dk/de/sturmfluten">https://web.archive.org/web/20131215125955/http://www.danhostel-ribe.dk/de/sturmfluten</a> , accessed 25Apr2021<br>-many old trees cracked off around Ribe                                                                                                                                                                                                                                                                                                                                                                                                                                                                                                                                   |
| Cappelen et al (2018d) | Cappelen J, S Olufsen, MH Ribergaard, JW Nielsen, T Schmith, H Hansen, Dagen derpa, updated 25Jun2018d, <a href="https://www.dmi.dk/vejr-og-atmosfare/temaforside-decemberorkanen-1999/dagen-derpaa/">https://www.dmi.dk/vejr-og-atmosfare/temaforside-decemberorkanen-1999/dagen-derpaa/</a><br>-in days after hurricane assessment of stormfalls carried out (trees blown down)<br>-stormfalls amounted to 3.4million m3; later better estimates 4 million m3<br>-TAB. Tabulated tree fall by tree type (coniferous, deciduous) and region (Sydjylland, upper Jylland ,Fyn. Sjaelland)                                                                                                                                                                                                                                   |
| Decker (2018)          | Decker, Lauge, Windthrow risk assessment of Douglas-fir stands in Denmark. A comparison study of Douglas-fir (Pseudotsuga menziesii) and Norway spruce (Picea abies), M.Sc. thesis, University of Copenhagen, submitted 6Aug2018 [pdf properties: title=Notatbog; author=Lauge Decker, Subject=SKOG303 - Silviculture and forest growth yield]<br>-Lindet state forest district Denmark; Anatol damage to different tree species: European beech, sessile oak, cypress unharmed; spruce & pine blown over (Jorgensen and Nielsen 2001)<br>-FIG6.2.[MAP] Maximum wind speed (gusts) during storm Anatol on 3Dec1999.<br>Orange marks forests experiencing wind throw.<br>Red dotted line is trajectory.<br>* -recommendations from windthrow act Act 349 17May2000                                                          |
| Cappelen (2019)        | Cappelen, John, Orkaner paa vore breddegrader, updated 8Jan2019 <a href="https://www.dmi.dk/vejr-og-atmosfare/temaforside-vind/orkaner-paa-vore-breddegrader/">https://www.dmi.dk/vejr-og-atmosfare/temaforside-vind/orkaner-paa-vore-breddegrader/</a> , (webpage downloaded 12Oct2020)<br>-massive storm fall of 4 million m3 wood & other vegetation especially Sonderjylland                                                                                                                                                                                                                                                                                                                                                                                                                                           |
| Wikipedia (20210418)   | Wikipedia, Orkan Anatol, <a href="https://de.wikipedia.org/wiki/Orkan_Anatol">https://de.wikipedia.org/wiki/Orkan_Anatol</a> , accessed 18Apr2021<br>-100s trees blown down on island of Foehr                                                                                                                                                                                                                                                                                                                                                                                                                                                                                                                                                                                                                             |

Table SL53. General ship/rig emergency reports/offshore incidents/platform evacuations (arranged by year and then alphabetically)

| Source                           | Full Reference and Notes                                                                                                                                                                                                                                                                                                                                                                                   |
|----------------------------------|------------------------------------------------------------------------------------------------------------------------------------------------------------------------------------------------------------------------------------------------------------------------------------------------------------------------------------------------------------------------------------------------------------|
| Kristeligt Dagblad (1999)        | Kristeligt Dagblad, Orkan haergede landet over. Paa vestkysten naede vindstyrken op pa 47 sekundmeter, 4Dec1999 00:00<br>-Sovaernets Operative Kommando: sea traffic okay                                                                                                                                                                                                                                  |
| Lloyd's Casualty Week (19991210) | Lloyd's Casualty Week, vol.318, No.11, Dec10, 1999<br>Bajorai, Baltica, Candourity, Corona, De Kaper, Dole America, Esmeralda, Framnes; Friedrich Russ, Friendship, Gerda Maria, Grampion Venture, Havsoke Jan V, Knighton, Kvinnherad, Larita, Monagas II, Nordhav, Palatin, Risvaer, Sirius, Sjard, Sleipner, Snorre B, Sociality, unidentified, Vana Tallinn, Viking Victor, Volharding,                |
| Lloyds Casualty Week (19991217)  | Lloyd's Casualty Week, vol318, No12, 17Dec1999<br>-fishing boat Sniegs capsizes in Latvia before dawn with 6 fatalities<br>-Bremnes, Grampion Venture, Paula Ahrens, Cincobulk, Seines, Stavanger, Sniegs,<br>-Rolf Buck, Oerd, Sztorm-2, Eastfern,<br>-Fensfjord, Lys Ranger, Lucky Fortune, Gerarda, Dana Hafnia, Ek-sky, Sea Explorer, Bussard, Ingrid P, GL. Graady,                                   |
| DGZRS (2000)                     | DGZRS, "Fischkutter brennt" Eiswette bringt die "Jente" und drei Mann in Sicherheit, Jahrbuch 2000, Deutsche Gesellschaft zur Rettung Schiffbruechiger, Hamburg, pp6-7, 2000.<br>-rescue of fish cutter Jente by German rescue cruiser Eiswette near Amrum                                                                                                                                                 |
| Leonhardsen et al (2001)         | Leonhardsen RL, G Ersdal, A Kvitrud, Experience and risk assessment of FPSOs in use on the Norwegian Continental Shelf. Description of Events, The Eleventh International Offshore and Polar Engineering Conference, International Society of Offshore and Polar Engineerings, 2001. 6pp. Paper No. 2001-IL-05 [pdf document datestamp=08Apr2001]<br>-green water incidents at Asgard A and Petrojarl Varg |
| HSE (2002c)                      | HSE, An investigation of storm incidents in UK waters, Prepared by the Met Office for the Health and Safety Executive, Offshore Technology Report 2001/078, 2002c.<br>-listing of 'wave' event on a 'ship'; it may be a rague wave strike on a ship or a greenwater incident on an FPSO                                                                                                                    |
| Bitner-Gregersen and             | Bitner-Gregersen EM, AK Magnusson, Extreme events in field data and in a second order wave model, Proc. of the                                                                                                                                                                                                                                                                                             |

|                                   |                                                                                                                                                                                                                                                                           |
|-----------------------------------|---------------------------------------------------------------------------------------------------------------------------------------------------------------------------------------------------------------------------------------------------------------------------|
| Magnusson (2004)                  | Rogue Waves 2004 workshop, Oct 20-22, 2004, Brest, France<br>-Varg B greenwater incident on 30Nov1999; Ekofisk wave data analysis                                                                                                                                         |
| Jensen and Mueller-Navarra (2008) | Jensen J, SH Mueller-Navarra, Storm surges on the German coast, Die Kueste, 74 ICCE (2008), 92-124.<br>-Anatol: Elbe lightship capsized in heavy seas and suffered heavy damage<br>unmanned lightship Elbe considered unnecessary as navigation aid; removed from service |
| Wikipedia (20210418)              | Wikipedia, Orkan Anatol, <a href="https://de.wikipedia.org/wiki/Orkan_Anatol">https://de.wikipedia.org/wiki/Orkan_Anatol</a> , accessed 18Apr2021<br>-shipwreck Feuerschiff FS2 at position of Elbe 1                                                                     |

Table SL54. Instrument failures during storm (arranged by year and then alphabetically)

| Source                         | Full Reference and Notes                                                                                                                                                                                                                                                                                                                                                                                                   |
|--------------------------------|----------------------------------------------------------------------------------------------------------------------------------------------------------------------------------------------------------------------------------------------------------------------------------------------------------------------------------------------------------------------------------------------------------------------------|
| DMI (19991209)                 | DMI, Rapport. Orkanen over Danmark den 3.-4. december 1999, Danmarks Meteorologiske Institut, Lyngbyvej 100, DK-2100 Kobenhaven 0, 9Dec1999.<br>-most powerful wind 38m/s measured at Romo 18:00MET; gust to more than 50m/s<br>-anemometer Romo broken by hurricane 1900MET                                                                                                                                               |
| Land Schleswig-Holstein (1999) | Land Schleswig-Holstein, Sturmflutereignis am 03.12.1999 (Wasserstaende an Pegelmessstellen), Amt fuer laendliche Raeume, Husum, Az.: 5621, document sent by Maria Bluemel 09Sep2020<br>- gauge power cut: Suedwesthoern, Schluettziel (power off during storm), S.N kood-Siel                                                                                                                                             |
| Kristensen et al (2000)        | Kristensen L, O Rathmann, SO Hansen, Extreme wind in Denmark, Journal of Wind Engineering and Industrial Aerodynamics, 87, 147-166, 2000.<br>-comment on missing data in wind speed time series in the calculation of 50 year extreme winds for 4 stations in Denmark                                                                                                                                                      |
| Neckelmann and Petersen (2000) | Neckelmann, S. and J. Petersen, Evaluation of the stand-alone wind and wave measurement systems for Horns Rev 150MW offshore wind farm in Denmark, OWEMES 2000, ATENA, Rome, Sicily, pp.17-27, 2000<br>-wave strike causes several day data gap in main meteorological measurement system                                                                                                                                  |
| Nielsen and Nielsen (2000)     | Nielsen, Jacob Woge and Nielsen, Mads Hvid, Stormfloden foraarsaget af orkanen den 3. december 1999, Vejret, 82, 8-14, Februar 2000<br>-DMI tide gauge Esbjerg and Vidaa/Hojer stopped when storm at highest<br>-KDI tide Ribe stopped during storm                                                                                                                                                                        |
| Rosenorn (2000)                | Rosenorn, Af Stig, De kraftigste storme i det tyvende aarhundrede in Denmark, Vejret, 82, 15-18, Februar 2000<br>-Romo and Ribe met stations had a power cut of several hours so highest gusts are not known                                                                                                                                                                                                               |
| Voldberg (2000)                | Voldberg Henrik, Vredens julemaaned, Vejret, 82, no.1, 1-7, Feb, 2000.<br>-1800UTC Romo reports gust of almost 50m/s; anemometer broke after                                                                                                                                                                                                                                                                               |
| DWD (20020528)                 | DWD, Orkantief 'Anatol' von 3./4. Dezember 1999 (5pp), <a href="https://www.dwd.de/DE/leistungen/besondereereignisse/stuerme/19991204_orkantief_anatol.pdf">https://www.dwd.de/DE/leistungen/besondereereignisse/stuerme/19991204_orkantief_anatol.pdf</a> [pdf document properties: timestamp: 28May2002]<br>-instrument malfunction for List auf Sylt so that strongest wind gust probably not recorded                  |
| Munich Re (2002)               | Munich Re, Winter Storms in Europe (II), Analysis of 1999 losses and loss potentials, Muenchener Rueck, Munich Re Group, 76pp, 2002<br>-power loss to Sylt met station; stronger gusts could not be ruled out                                                                                                                                                                                                              |
| Nilsson et al (2002)           | Nilsson C, S Goyette, L Barring, Relating forest damage data to the wind field from high-resolution RCM simulations: case study of Anatol striking Sweden in December 1999, Global and Planetary Change, 57, 161-176, 2007.<br>-time series data for Sweden Hano and Skillinge have gaps because of temporary instrument or data transfer failure                                                                          |
| Sommer (2002)                  | Sommer A, Wind Resources at Horns Rev, Eltra PSO-2000 Proj nr. EG-05 3248, Tech-wise, 2002.<br>-wave strike on instrument cabin at 6.2m height at Horns Rev mast pushed power plugs out of sockets and switched off primary measurement system for 10days.                                                                                                                                                                 |
| Goennert and Buss (2009)       | Goennert, Gabriele & Thomas Buss, Sturmfluten zur Bemessung von Hochwasserschutzanlagen, Berichte des Landesbetriebes Strassen, Bruecken und Gewaesser Nr.2/2009, Freie und Hansestadt Hamburg, Landesbetrieb Strassen, Bruecken und Gewaesser, Hamburg ISSN 1867-7959.<br>-Cuxhaven tide gauge fails 04Dec2013 15:30                                                                                                      |
| Danhostel-Ribe (2013)          | Danhostel-Ribe, Sturmfluten, <a href="https://web.archive.org/web/20131215125955/http://www.danhostel-ribe.dk/de/sturmfluten">https://web.archive.org/web/20131215125955/http://www.danhostel-ribe.dk/de/sturmfluten</a> , accessed 25Apr2021<br>-Ribe Kammersleuse tide gauge failed when water level reached 5.13m<br>-dike surveys 1 day later showed water level+wave runup reached 6.7m or 0.3m below dike crest 7.0m |
| Pelt (2013)                    | Pelt, S., Kraftige storme med oprindelse i Nordatlanten, Vejret, 137, 44-47, 2013<br>-Romo anemometer broke at height of storm so wind speeds higher than avg 38.1 gust 51.4m/s possible                                                                                                                                                                                                                                   |
| Cappelen et al (2018e)         | Cappelen J, S Olufsen, MH Ribergaard, JW Nielsen, T Schmith, N Hansen, Orkan passerer, updated 25Jun2018e, <a href="https://www.dmi.dk/vejr-og-atmosfare/temaforside-decemberorkanen-1999/orkanen-passerer/">https://www.dmi.dk/vejr-og-atmosfare/temaforside-decemberorkanen-1999/orkanen-passerer/</a><br>-after 1900, winds decreased slowly but anemometer connection at Romo broken                                   |
| Astleitner (2019)              | Astleitner, Thomas, 3. December 1999: Orkantief Anatol fegt ueber de Nordsee, <a href="https://uwr.de/de/a/3-dezember-1999-orkan-tief-anatol-trifft-deutschland">https://uwr.de/de/a/3-dezember-1999-orkan-tief-anatol-trifft-deutschland</a> , published 3Dec2019, accessed 20Sep2020<br>*-Sylt had unbelievable 185km/h wind gust<br>*-station had power loss for several hours; possible that wind gusts were higher    |
| Cappelen (2019)                | Cappelen, John, Orkaner paa vore breddegrader, updated 8Jan2019 <a href="https://www.dmi.dk/vejr-og-atmosfare/temaforside-vind/orkaner-paa-vore-breddegrader/">https://www.dmi.dk/vejr-og-atmosfare/temaforside-vind/orkaner-paa-vore-breddegrader/</a> , (webapage downloaded 12Oct2020)<br>-Ribe water level reached 5.12m; instrument malfunction                                                                       |
| Wikipedia (20210418)           | Wikipedia, Orkan Anatol, <a href="https://de.wikipedia.org/wiki/Orkan_Anatol">https://de.wikipedia.org/wiki/Orkan_Anatol</a> , accessed 18Apr2021<br>-highest gust Sylt 180km/h before power failed                                                                                                                                                                                                                        |

Table SL55. Nonhomogeneous data sets (arranged by year and then alphabetically)

| Source                         | Full Reference and Notes                                                                                                                                                                                       |
|--------------------------------|----------------------------------------------------------------------------------------------------------------------------------------------------------------------------------------------------------------|
| Vedin and Alexandersson (1999) | Vedin, Haldo and Hans Alexandersson, Aarhunderadets storm? Vaader och Vatten, p.18, Dec, 1999<br>-storm 3-4Dec was worst in Sweden farvand region since start of 1990s<br>-Falsterbo had worst wind since 1967 |

|                            |                                                                                                                                                                                                                                                                                                                                                                                                                                                            |
|----------------------------|------------------------------------------------------------------------------------------------------------------------------------------------------------------------------------------------------------------------------------------------------------------------------------------------------------------------------------------------------------------------------------------------------------------------------------------------------------|
|                            | -significant gusts: Hano to 43m/s, Malmo to 36m/s<br>* -not possible to compare gusts with previous times; before 1995, gust meas only at airports                                                                                                                                                                                                                                                                                                         |
| Kristensen et al (2000)    | Kristensen L, O Rathmann, SO Hansen, Extreme wind in Denmark, Journal of Wind Engineering and Industrial Aerodynamics, 87, 147-166, 2000.<br>-Sprogo mast wind speed time series discontinued in 1999 before storm Anatol<br>-wind speed time series relatively short; Sprogo longest record & extends back to 1977.                                                                                                                                       |
| Rosenorn (2000)            | Rosenorn, Af Stig, De kraftigste storme i det tyvende aarhundrede in Denmark, Vejret, 82, 15-18, Februar 2000<br>-modern anemometers in use only over past 20-30 years<br>-difficult to assess wind conditions for 1902 storm                                                                                                                                                                                                                              |
| Schmidt (2001)             | Schmidt H, Die Entwicklung der Sturmhaufigkeit in der Deutschen Bucht zwischen 1878 und 2000. Klimastatusbericht 2001, DWD. pp199-205.<br>-no homogeneous data sets for German Bight longer than 30 years<br>-geostrophic wind speeds more homogeneous but deviations between 2 independent data sets in 1950s.                                                                                                                                            |
| DWD (20020528)             | DWD, Orkantief 'Anatol' von 3./4. Dezember 1999 (5pp), <a href="https://www.dwd.de/DE/leistungen/besondereereignisse/stuerme/19991204_orkantief_anatol.pdf">https://www.dwd.de/DE/leistungen/besondereereignisse/stuerme/19991204_orkantief_anatol.pdf</a> [pdf document properties: datestamp: 28May2002]<br>-Change of instrumentation for List auf Sylt 1995 so that higher gusts could be registered<br>-before 1995 highest values bounded at 160km/h |
| Von Storch and Woth (2008) | von Storch, Hans and Katja Woth, Storm surges: perspectives and options, Sustain Sci, 3, 33-43, 2008<br>-problems with quantifying historic sea level rise; near-lying German stations in east Waddensee disagree                                                                                                                                                                                                                                          |
| Gatey (2011)               | Gatey, DA, The analysis of extreme synoptic winds, Ph.D. Thesis, University of Western Ontario, 2011. University of Western Ontario - Electronic Thesis and Dissertation Repository. Paper 268.<br>-jumps and discontinuities in 50y wind speed across national boundaries                                                                                                                                                                                 |
| Pelt (2013)                | Pelt, S., Kraftige storme med oprindelse i Nordatlanten, Vejret, 137, 44-47, 2013<br>-few wind speed data from early 20C and quality lower; difficult to compare with modern measurements                                                                                                                                                                                                                                                                  |

Table SL56. Climatological background of storm; unusual preceding weather events (arranged by year and then alphabetically)

| Source               | Full Reference and Notes                                                                                                                                                                                                                                                                                                                                                                                                          |
|----------------------|-----------------------------------------------------------------------------------------------------------------------------------------------------------------------------------------------------------------------------------------------------------------------------------------------------------------------------------------------------------------------------------------------------------------------------------|
| Met Eireann (199912) | Met Eireann, Monthly Weather Bulletin, no. 164, Dec, 1999<br>-annual temperature Ireland 1C above normal<br>-6th consecutive year with mean annual temperatures above normal for Ireland<br>-annual temperature Ireland not as high as the record year of 1997.                                                                                                                                                                   |
| Bell et al (1999)    | Bell GD, MS Halpert, RS Schnell, RW Higgins, J Lawrimore, VE Kousky, R Tinker, W Thlaw, M Chelliah, A Arthusa, Climate Assessment for 1999, Bulletin of the American Meteorological Society, 81, S1-S50, 2000<br>-1999 had rank 5 high surface temperatures and rank2 extratropical surface temperature since record start 1880<br>* -anomalous 1999 warmth continues trend that began 1977<br>-1998 was rank 1 temperature year. |
| Bresch et al (2000)  | Bresch DN, M Bisping, G Lemcke, Storm over Europe. An underestimated risk, Swiss Re (Swiss Reinsurance Company), 27pp, 2000.<br>-storm series phenomenon in 1990 & 1999<br>-stationary Icelandic low                                                                                                                                                                                                                              |
| Rosenorn (2000b)     | Rosenorn, Af Stig, Efteraarsvejret 1999, Vejret, 82, No1., 22 Aargang, pp. 24-27, Februar, 2000b.<br>-record warm temperatures during September 1999 at 16.2C; 3.5C over 1961-1990 climate normal<br>-previous record Sept 1949 with 16.0C<br>-October and November with normal temperatures; overall SON temperatures much higher than average                                                                                   |
| DWD (20020528b)      | DWD, Klimatologische Bewertung der juensten Stark-Windereignisse (Anatol und Lothar) aus der Sicht der Klimatologie der freien Atmosphaere, [pdf document properties: 28/05/2002]<br>-unusually high radiosonde wind speeds during the winters 1995/6, 1996/7, and 1997/8 (winter 1998/9 normal)<br>-radiosonde time series record from 1974                                                                                      |
| Munich Re (2002)     | Munich Re, Winter Storms in Europe (II), Analysis of 1999 losses and loss potentials, Muenchener Rueck, Munich Re Group, 76pp, 2002<br>-1999 & 1990 rank3 warmest year central Europe after 1934 & 1994<br>-Germany 1.3C higher than climate normal 1961-1990<br>-meteorological precursor situation 1990 & 1999 similar                                                                                                          |
| Humbling (2013)      | Humbling David, Weatherwatch: Our severe gales are not hurricanes, but they can be as deadly, The Guardian, 13Dec2013<br>-distribution of 20 most damaging European storms by month: Oct=2, Dec=5, Jan=9, Feb=4                                                                                                                                                                                                                   |
| Joyner (2013)        | Joyner, T.A., Optimizing peak gust and maximum sustained wind speed estimates from mid-latitude wave cyclones, Louisiana State University Doctoral Dissertations, 421, 2013<br>-Lothar stronger because: 1. stronger than normal upper level jet; 2. rapid intensification;<br>3. higher than normal Atlantic temperatures                                                                                                        |

Table SL57. Storm timing compared with spring tide; phase of surge and tide (arranged by year and then alphabetically)

| Source                     | Full Reference and Notes                                                                                                                                                                                                                                                                                              |
|----------------------------|-----------------------------------------------------------------------------------------------------------------------------------------------------------------------------------------------------------------------------------------------------------------------------------------------------------------------|
| DMI (19991209)             | DMI, Rapport. Orkanen over Danmark den 3.-4. december 1999, Danmarks Meteorologiske Institut, Lyngbyvej 100, DK-2100 Kobenhaven 0, 9Dec1999.<br>-maximum winds were at astronomical low water<br>-if wind field had been 3-6h earlier then water levels would have been 1-1.5m higher                                 |
| RWS (1999)                 | RWS, Verslag van de Stormvloed can 3 en 4 december 1999 (SR79), Ministerie van VerKeer en Waterstaat, Directoraat-Generaal Rijkswaterstaat, Rijksinstituut voor Kust en Zee, Stormvloedwaarschuwingsdienst, Postbus 20907, 2500EX 's-Gravenhage, 's-Gravenhage, december 1999.<br>-maximum surge 3h before high water |
| Nielsen and Nielsen (2000) | Nielsen, Jacob Woge and Nielsen, Mads Hvid, Stormfloden foraarsaget af orkanen den 3. december 1999, Vejret, 82, 8-14, Februar 2000                                                                                                                                                                                   |

|                        |                                                                                                                                                                                                                                                                                                                                                                                                                                                                           |
|------------------------|---------------------------------------------------------------------------------------------------------------------------------------------------------------------------------------------------------------------------------------------------------------------------------------------------------------------------------------------------------------------------------------------------------------------------------------------------------------------------|
|                        | -surge max at low water; catastrophe would have occurred with higher water levels by 1m if surge and tide max coincided                                                                                                                                                                                                                                                                                                                                                   |
| Mueller-Navarra (2005) | Mueller-Navarra, Sylvain, Sturmfluten. Land under an Nord- und Ostsee, in: Entfesselte Elemente-Der Mensch und die Kraefte der Natur, 5, 92-99, Guetersloh. Wissen-Media-Verl., 2005<br>-comment that water levels 1.5m above normal low tide and 6 h later water levels reached 4.53mNN                                                                                                                                                                                  |
| Danhostel-Ribe (2013)  | Danhostel-Ribe, Sturmfluten, <a href="https://web.archive.org/web/20131215125955/http://www.danhostel-ribe.dk/de/sturmfluten">https://web.archive.org/web/20131215125955/http://www.danhostel-ribe.dk/de/sturmfluten</a> , accessed 25Apr2021<br>-Ribe storm surge arrived during low tide<br>-if surge had come at high tide, water would have been 1-1.5m higher; levels would have been comparable to 1634 Burchardi flood and Ribe would have been flooded.           |
| Capellen (2019)        | Capellen, John, Orkaner paa vore breddegrader, updated 8Jan2019 <a href="https://www.dmi.dk/vejr-og-atmosfare/temaforside-vind/orkaner-paa-vore-breddegrader/">https://www.dmi.dk/vejr-og-atmosfare/temaforside-vind/orkaner-paa-vore-breddegrader/</a> , (webapage downloaded 12Oct2020)<br>*-surge occurred at low water; could have been 1-1.5m higher if at astron high water<br>-surge would have been at same level as 11Oct1634 (worst Waddensee surge ever 6.12m) |

Table SL58. Tide analysis (arranged by year and then alphabetically)

| Source        | Full Reference and Notes                                                                                                                                                                                                                                                                                                    |
|---------------|-----------------------------------------------------------------------------------------------------------------------------------------------------------------------------------------------------------------------------------------------------------------------------------------------------------------------------|
| RWS (1999)    | RWS, Verslag van de Stormvloed van 3 en 4 december 1999 (SR79), Ministerie van Verkeer en Waterstaat, Directoraat-Generaal Rijkswaterstaat, Rijksinstituut voor Kust en Zee, Stormvloedwaarschuwingsdienst, Postbus 20907, 2500EX 's-Gravenhage, 's-Gravenhage, december 1999.<br>-tide analysis for 6 Dutch basis stations |
| Larsen (2020) | Data files sent by X. Larsen in 2020 of tide model analysis of water level measured at Horn's Rev and Esberg                                                                                                                                                                                                                |

Table SL59. Data filtering and discretization issues (arranged by year and then alphabetically)

| Source                         | Full Reference and Notes                                                                                                                                                                                                                                                                                                                                                                                                                                                                                                                                                                                                                                                                                                                                                                                                           |
|--------------------------------|------------------------------------------------------------------------------------------------------------------------------------------------------------------------------------------------------------------------------------------------------------------------------------------------------------------------------------------------------------------------------------------------------------------------------------------------------------------------------------------------------------------------------------------------------------------------------------------------------------------------------------------------------------------------------------------------------------------------------------------------------------------------------------------------------------------------------------|
| DWD (20020528)                 | DWD, Orkantief 'Anatol' von 3./4. Dezember 1999 (5pp), <a href="https://www.dwd.de/DE/leistungen/besondereereignisse/stuerme/19991204_orkantief_anatol.pdf">https://www.dwd.de/DE/leistungen/besondereereignisse/stuerme/19991204_orkantief_anatol.pdf</a> [pdf document properties: datestamp: 28May2002]<br>-comment that Torup met data available only every 3h                                                                                                                                                                                                                                                                                                                                                                                                                                                                 |
| Neckelmann and Petersen (2000) | Neckelmann, S. and J. Petersen, Evaluation of the stand-alone wind and wave measurement systems for Horns Rev 150MW offshore wind farm in Denmark, OWEMES 2000, ATENA, Rome, Sicily, pp.17-27, 2000<br>-5s gust defined as average of 5 1Hz measurements of cup anemometer                                                                                                                                                                                                                                                                                                                                                                                                                                                                                                                                                         |
| Krogstad et al (2008)          | Krogstad, HE., S.F. Barstow, J.P. Mathisen, L. Lonseth, A.K. Magnusson, M.A. Donelan, Extreme waves in the long-term wave measurements at Ekofisk, in Proc. Rogue Waves 2008 Workshop, ed. by M Olagnon and M. Prevosto, 13-15Oct2008, Brest France, 23-33, 2008<br>-special cleaning procedures applied to Ekofisk Reference Data Set to remove spikes:<br>-check compared the raw data to a band-pass filtered version (0.03-0.5Hz), and all records with a significant difference around the maximum crest (indicative of a spike or an irregularity were discarded from further analysis'<br>-check compared the raw data to a band-pass filtered version (0.03-0.5Hz), and all records with a significant difference around the maximum crest (indicative of a spike or an irregularity were discarded from further analysis' |

Table SL60. Difficulties in meteorological model of storm (arranged by year and then alphabetically)

| Source                                  | Full Reference and Notes                                                                                                                                                                                                                                                                                                                                                                                                                                                                                                                                                                                                                                                                                                                                        |
|-----------------------------------------|-----------------------------------------------------------------------------------------------------------------------------------------------------------------------------------------------------------------------------------------------------------------------------------------------------------------------------------------------------------------------------------------------------------------------------------------------------------------------------------------------------------------------------------------------------------------------------------------------------------------------------------------------------------------------------------------------------------------------------------------------------------------|
| Bancroft (2000)                         | Bancroft, George P., Marine Weather Review - North Atlantic Area September through December 1999, Mariners Weather Log, Vol.44, No.1, April 2000. pp.23-38.<br>-surface analysis charts show low pressure center appearing and deepening after 12UTC 02Dec1999                                                                                                                                                                                                                                                                                                                                                                                                                                                                                                  |
| Buizza and Hollingsworth (2001)         | Buizza, Roberto and Anthony Hollingsworth, Severe weather prediction using the ECMWF EPS - The European Storms of December 1999, ECMWF Newsletter, No. 89, Winter 2000/01.<br>-ECMWF standard operational model able to predict intensity and position of storm accurately 132h in advance; not stable model result and subsequent forecasts much poorer.<br>-low resolution ensemble bad at advance forecast of storm over Denmark; a few of the members captured the storm at the 132h forecast; most members did not capture storm until 24h before event<br>-High resolution ensemble performed better and half of members captured storm accurately at 55h before event<br>-model simulations for Lothar and Martin even worse (small, fast-moving storms) |
| Buizza and Hollingsworth (2002)         | Buizza, Roberto and Anthony Hollingsworth, Storm prediction over Europe using the ECMWF ensemble prediction system, Meteorol. Appl., 9, 2002<br>-ECMWF standard operational model able to predict intensity and position of storm accurately 132h in advance; not stable model result and subsequent forecasts much poorer.<br>-low resolution ensemble bad at advance forecast of storm over Denmark; a few of the members captured the storm at the 132h forecast; most members did not capture storm until 24h before event<br>-High resolution ensemble performed better and half of members captured storm accurately at 55h before event<br>-model simulations for Lothar and Martin even worse (small, fast-moving storms)                               |
| Woetmann Nielsen and Hansen Sass (2003) | Woetmann Nielsen N and B Hansen Sass, A numerical, high-resolution study of the life cycle of the severe storm over Denmark on 3Dec1999, Tellus, 55A, 338-351, 2003.<br>-DMI HIRLAM model operational forecast not good enough for surge prediction<br>-post-storm analysis with HIRLAM model gave better storm simulation for track, phase of storm, and intensity of low level jet<br>-model improved by higher horizontal and vertical resolution (0.15deg and 50levels) and extending domain to central Atlantic                                                                                                                                                                                                                                            |
| Frank and Majewski (2006)               | Frank, H, and D Majewski, Hindcasts of historic storms with the DWD models GME, LMQ and LMK using ERA-40 reanalysis, ECMWF Newsletter No. 109, autumn 2006, pp.16-21.<br>-small storm can not captured well with ERA-40 resolution                                                                                                                                                                                                                                                                                                                                                                                                                                                                                                                              |

|  |                                                                                                                                                                                                                                                                                                                                                                                                                                                                                                                                                                                                                                                                    |
|--|--------------------------------------------------------------------------------------------------------------------------------------------------------------------------------------------------------------------------------------------------------------------------------------------------------------------------------------------------------------------------------------------------------------------------------------------------------------------------------------------------------------------------------------------------------------------------------------------------------------------------------------------------------------------|
|  | <ul style="list-style-type: none"> <li>-Anatol investigated using ECMWF's Ensemble Prediction System (EPS)</li> <li>-Buizza and Hollingsworth (2001): high res EPS T255 predicted storm much better than operational EPS T159 with same resolution as ERA-40 analysis</li> <li>* -strongest winds in cold sector S &amp; SW of centre</li> <li>-3 submodels predict approximately same max wind speed</li> <li>-ERS-40 much weaker because pressure gradient weaker</li> <li>-LMK best for capturing short backing of wind at 2300Z 2Dec and 1800Z 4Dec</li> <li>-small scale convective structures beginning to emerge in highest resolution LMK model</li> </ul> |
|--|--------------------------------------------------------------------------------------------------------------------------------------------------------------------------------------------------------------------------------------------------------------------------------------------------------------------------------------------------------------------------------------------------------------------------------------------------------------------------------------------------------------------------------------------------------------------------------------------------------------------------------------------------------------------|

Table SL61. Difficulties in modelling water levels and surge (arranged by year and then alphabetically)

| Source                       | Full Reference and Notes                                                                                                                                                                                                                                                                                                                                                                                                                                                                                                                                                                                                                                                       |
|------------------------------|--------------------------------------------------------------------------------------------------------------------------------------------------------------------------------------------------------------------------------------------------------------------------------------------------------------------------------------------------------------------------------------------------------------------------------------------------------------------------------------------------------------------------------------------------------------------------------------------------------------------------------------------------------------------------------|
| DMI (1999/2009)              | <p>DMI, Rapport. Orkanen over Danmark den 3.-4. december 1999, Danmarks Meteorologiske Institut, Lyngbyvej 100, DK-2100 København 0, 9Dec1999.</p> <p>-forecast water levels in Waddensee were 1-1.5m lower than measured due to error in wind field model that made an incorrect prediction of the storm trajectory</p>                                                                                                                                                                                                                                                                                                                                                       |
| RWS (1999)                   | <p>RWS, Verslag van de Stormvloed van 3 en 4 december 1999 (SR79), Ministerie van Verkeer en Waterstaat, Directoraat-Generaal Rijkswaterstaat, Rijksinstituut voor Kust en Zee, Stormvloedwaarschuwingsdienst, Postbus 20907, 2500EX 's-Gravenhage, 's-Gravenhage, december 1999.</p> <p>-observed water levels at Delfzijl 0.36m higher than forecast</p>                                                                                                                                                                                                                                                                                                                     |
| Nielsen and Nielsen (2000)   | <p>Nielsen, Jacob Woge and Nielsen, Mads Hvid, Stormfloden forårsaget af orkanen den 3. december 1999, Vejret, 82, 8-14, Februar 2000</p> <p>-DMI model water levels up to 2.5m lower than observations</p> <p>-correct surge warning not sent out</p> <p>-problem with met wind field prediction from deficient access to meas network on 2Dec</p> <p>-with best available wind field field, Mike21 surge model still deficient</p> <p>-actions at DMI to improve surge model</p> <p>-0.2m error for good surge prediction</p>                                                                                                                                                |
| Voldberg (2000)              | <p>Voldberg Henrik, Vredens julemaaned, Vejret, 82, no.1, 1-7, Feb, 2000.</p> <p>-high water levels on jyske west coast that was less well forecast</p> <p>-poor water forecast from E15 Hirlam based on 03Dec 00UTC predicted low P traj</p> <p>-predictions from 12h earlier were better.</p>                                                                                                                                                                                                                                                                                                                                                                                |
| Woetmann Nielsen (2000)      | <p>Woetmann Nielsen, AN, DMI-HIRLAM's forudsigelse af orkanen den 3.december 1999. Vejret, 82, pp. 19-23, februar 2000.</p> <p>-problems in forecasting Denmark west coast storm surge originated in poor meteorological forecast</p>                                                                                                                                                                                                                                                                                                                                                                                                                                          |
| Mueller-Navarra et al (2003) | <p>Mueller-Navarra SH, W Lang, S Dick, KC Soetje, Ueber de Verfahren der Wasserstands- und Stormflutvorhersage. Hydrodynamisch-numerische Modelle der Nord- und Ostsee und ein empirisch-statistisches Verfahren fuer die Deutsche Bucht, promet. Jahrg. 29, Nr 1-4, 117-124, June 2003</p> <p>-difficulty in predicting surge water levels more than 18h ahead.</p> <p>-TAB4. Wind forecast of the Seewetterdienstes Hamburg, times in MEZ (widely varying Cuxhaven water level estimates on evening of 3Dec1999 based on successive wind speed and direction forecasts; all water level predictions lower than actual event but the earliest forecast was most accurate)</p> |
| Jensen et al (2006)          | <p>Jensen J, C Mudersbach, SH Mueller-Navarra, I Bork, C Koziar, V Renner, Modellgestuetzte Untersuchungen zu Sturmfluten mit sehr geringen Eintrittswahrscheinlichkeiten an der deutschen Nordseekueste, Die Kueste, 71, 123-167, 2006.</p> <p>-maximum envelope of highest water levels from 50 member model ensemble versus measured Anatol water levels in German Bight</p> <p>-role of drag coefficient parameterization</p>                                                                                                                                                                                                                                              |
| Herrling et al (2010)        | <p>Herrling Gerald, Heiko Knaack, Ralf Kaiser, Hanz D. Niemayer, Evaluation of design water levels at the Ems-Dollard estuary considering the effect of a storm surge barrier, 32nd Conference on Coastal Engineering 2010, Shanghai, China, 30Jun-05Jul2020. ed by JM Smith and P Lynett, pp. 3899-3917, [pdf document properties: title=ICCE2020_Ems_final, datestamp=15Sep2010</p> <p>-model water level predictions 15-20cm below observations because of low resolution wind fields</p>                                                                                                                                                                                   |
| Environment Agency (2012)    | <p>Environment Agency, Thames Barrier Project Pack 2012, time stamp Nov. 24, 2011</p> <p>-measured tide much higher than forecast and Thames Barrier was closed</p>                                                                                                                                                                                                                                                                                                                                                                                                                                                                                                            |
| Ge et al (2014)              | <p>Ge J, D Much, J Kappenberg, O Nino, P Ding, Z Chen, Simulating storm flooding maps over Hafencity under present and sea level rise scenarios, Journal of Flood Risk Management, 7, 319-331, 2014.</p> <p>-unstructured grid model performed well in simulating the Hamburg surge</p>                                                                                                                                                                                                                                                                                                                                                                                        |

Table SL62. Future sea level rise and flooding effects; future climate and storm return period (arranged by year and then alphabetically)

| Source                 | Full Reference and Notes                                                                                                                                                                                                                                                                                                                                                                                                                                                                 |
|------------------------|------------------------------------------------------------------------------------------------------------------------------------------------------------------------------------------------------------------------------------------------------------------------------------------------------------------------------------------------------------------------------------------------------------------------------------------------------------------------------------------|
| Mueller-Navarra (2005) | <p>Mueller-Navarra, Sylvin, Sturmfluten. Land under an Nord- und Ostsee, in: Entfesselte Elemente-Der Mensch und die Kraefte der Natur, 5, 92-99, Guetersloh. Wissen-Media-Verl., 2005</p> <p>-0.6C global warming in 20C; this could lead to more intense storms; not all water level extremes have been realized</p> <p>-large uncertainty in future sea level rise; minimum estimate 10cm by end 21st century; several researchers believe it could be as high as several metres.</p> |
| Jensen et al (2006)    | <p>Jensen J, C Mudersbach, SH Mueller-Navarra, I Bork, C Koziar, V Renner, Modellgestuetzte Untersuchungen zu Sturmfluten mit sehr geringen Eintrittswahrscheinlichkeiten an der deutschen Nordseekueste, Die Kueste, 71, 123-167, 2006.</p> <p>-Cuxhaven water levels rising at 0.26cm/y; time series adjusted to 2004 before calculating return periods</p>                                                                                                                            |
| Herrling et al (2010)  | <p>Herrling Gerald, Heiko Knaack, Ralf Kaiser, Hanz D. Niemayer, Evaluation of design water levels at the Ems-Dollard estuary considering the effect of a storm surge barrier, 32nd Conference on Coastal Engineering 2010, Shanghai, China, 30Jun-05Jul2020. ed by JM Smith and P Lynett, pp. 3899-3917, [pdf document properties: title=ICCE2020_Ems_final, datestamp=15Sep2010</p>                                                                                                    |

|                             |                                                                                                                                                                                                                                                                                                                                                                                                                                                                                                                                                                                                                                                                                                                                                       |
|-----------------------------|-------------------------------------------------------------------------------------------------------------------------------------------------------------------------------------------------------------------------------------------------------------------------------------------------------------------------------------------------------------------------------------------------------------------------------------------------------------------------------------------------------------------------------------------------------------------------------------------------------------------------------------------------------------------------------------------------------------------------------------------------------|
|                             | -Design water level for Emden revised upward to 6.39m including 50cm increase to account for the sea level rise next century<br>-Niedersachsen state government changes 100 year sea level rise from 25cm to 50cm                                                                                                                                                                                                                                                                                                                                                                                                                                                                                                                                     |
| Danhostel-Ribe (2013)       | Danhostel-Ribe, Sturmfluten, <a href="https://web.archive.org/web/20131215125955/http://www.danhostel-ribe.dk/de/sturmfluten">https://web.archive.org/web/20131215125955/http://www.danhostel-ribe.dk/de/sturmfluten</a> , accessed 25Apr2021<br>-storm flooding levels becoming more frequent in last 50y<br>-sea level has increased by 11cm in last 100y<br>-UN climate scientists expect global water levels to increase 18-59cm<br>-one group of experts expect water level increase 1m                                                                                                                                                                                                                                                          |
| Ge et al (2014)             | Ge J, D Much, J Kappenberg, O Nino, P Ding, Z Chen, Simulating storm flooding maps over Hafencity under present and sea level rise scenarios, Journal of Flood Risk Management, 7, 319-331, 2014.<br>-predictions of Hamburg flood level to 2100<br>-sea level rise anticipated to be between 0.18-0.59m                                                                                                                                                                                                                                                                                                                                                                                                                                              |
| Cappelen et al (2018f)      | Cappelen J, S Olufsen, MH Ribergaard, JW Nielsen, T Schmith, N Hansen, Bringer fremtiden flerer decemberorkaner? 25Jun2018f, <a href="https://www.dmi.dk/vejr-og-atmosfare/temaforside-decemberorkanen-1999/bringer-fremtiden-flere-decemberorkanen/">https://www.dmi.dk/vejr-og-atmosfare/temaforside-decemberorkanen-1999/bringer-fremtiden-flere-decemberorkanen/</a><br>-models predict shift in North Atlantic storm track in 2100<br>-storms in North Sea will become more frequent and stronger<br>-high average wind speed for Denmark to increase by 10% at 2100<br>-wind climate of Denmark will become more like Scotland today<br>-more research is needed to assess if the decemberorkanen of 1999 will be a 30,10,5 year event at 2100. |
| Buchana and McSharry (2019) | Buchana P, PR McSharry, Windstorm risk assessment for offshore wind farms in the North Sea, Wind Energy, 22, 1219-1229, 2019<br>-mention of increased storminess and offshore wind farm risk with climate change                                                                                                                                                                                                                                                                                                                                                                                                                                                                                                                                      |

Table SL63. Storm event as manifestation of climate change (arranged by year and then alphabetically)

| Source                 | Full Reference and Notes                                                                                                                                                                                                                                                                                                                                                                                                                                                                                                                                                                                         |
|------------------------|------------------------------------------------------------------------------------------------------------------------------------------------------------------------------------------------------------------------------------------------------------------------------------------------------------------------------------------------------------------------------------------------------------------------------------------------------------------------------------------------------------------------------------------------------------------------------------------------------------------|
| Bresch et al (2000)    | Bresch DN, M Bisping, G Lemcke, Storm over Europe. An underestimated risk, Swiss Re (Swiss Reinsurance Company), 27pp, 2000.<br>-discussion global temperature increase 20C; acceleration since 1976; uncertain temperatures at 2100<br>-computer simulations and meteorological records indicate that although the frequency and intensity of storms over the Atlantic have increased slightly during recent decades, the storm paths tend to be further to the north'<br>-at present, a direct correlation between storm losses and climate change cannot be substantiated on the basis of reliable data'      |
| UN/ECE (2000)          | UN/ECE Timber Committee, Chapter 3. Effects of the December 1999 storms on European timber markets, ECE/FAO Forest Products Annual Market Review, 1999-2000, 15pp, 2000, Timber Bulletin, Vol LIII, ECE/TIM/BULL/53/3 [pdf document properties: title=3stormdamageFIN.PDF; author=najera; datestamp=15/08/2000] <a href="https://www.unece.org/fileadmin/DAM/timber/docs/rev-00/rev00.htm">https://www.unece.org/fileadmin/DAM/timber/docs/rev-00/rev00.htm</a><br>* -insufficient evidence to demonstrate storms becoming more frequent or severe<br>-enormous storm damage occurred regularly                  |
| Ulblich et al (2001)   | Ulblich U, AH Fink, M Klawa, JG Pinto, Three extreme storms over Europe in December 1999, Weather 56, 70-80, 2001<br>-With respect to the scientific and public discussion on anthropogenic climate change one should emphasise that the occurrence of the storms cannot be taken as evidence for an enhanced greenhouse gas effect. Firstly, such an attempt would be inappropriate from a statistical point of view. Secondly, only the first of the three storms, Anatol, seems to fit the greenhouse gas signal recently described by Knippertz et al (2000)'<br>...ie. more storm events in northern Europe |
| DWD (20020528b)        | DWD, Klimatologische Bewertung der juensten Stark-Windereignisse (Anatol und Lothar) aus der Sicht der Klimatologie der freien Atmosphaere, [pdf document properties: 28/05/2002]<br>-unusually high radiosonde wind speeds during Storm Anatol similar to unusually high values in winters 1995/6, 1996/7, 1997/8                                                                                                                                                                                                                                                                                               |
| Munich Re (2002)       | Munich Re, Winter Storms in Europe (II), Analysis of 1999 losses and loss potentials, Muenchener Rueck, Munich Re Group, 76pp, 2002<br>-effects of climate change on wind storm events ... matter of controversial discussion<br>* -blocking high central Europe; loss of snow cover permits storm entry                                                                                                                                                                                                                                                                                                         |
| Tatge (2009)           | Tatge, Yoern, Looking back, looking forward: Anatol, Lothar and Martin ten years later, 09Dec2009. <a href="https://www.air-worldwide.com/publications/air-currents/looking-back-looking-forward-anatol-lothar-and-martin-ten-years-later/">https://www.air-worldwide.com/publications/air-currents/looking-back-looking-forward-anatol-lothar-and-martin-ten-years-later/</a><br>-severe winter storm events had previously been perceived as very rare; 1990 event meant that another would not occur soon.<br>-emergent phenomenon of storm clustering                                                        |
| Schwierz et al (2010)  | Schwierz C, P Koellnet-Heck, E Zenklusen Mutter, DN Bresch, P-L Vidale, M Wild, C Schaer, Modelling European winter wind storm losses in current and future climate, Climatic Change, 101, 485-514, 2010.<br>-it is widely accepted that the world's climate is changing which results in significant alterations of regional weather and climatic conditions'                                                                                                                                                                                                                                                   |
| Joyner (2013)          | Joyner, T.A., Optimizing peak gust and maximum sustained wind speed estimates from mid-latitude wave cyclones, Louisiana State University Doctoral Dissertations, 421, 2013<br>-these patterns, along with other forcing mechanisms and climatic conditions, are in a constant state of flux with changes potentially attributable to anthropogenic climate change, which has led many to suggest that changes in climate are at least partly to blame for recent increases in catastrophes'                                                                                                                     |
| Capellen et al (2018c) | Cappelen J, S Olufsen, MH ribergaard, JW Nielsen, T Schmith, N Hansen, Var klimaendringer skyld i decemberorkan? updated 25Jun2018c, <a href="https://www.dmi.dk/vejr-og-atmosfare/temaforside-decemberorkanen-">https://www.dmi.dk/vejr-og-atmosfare/temaforside-decemberorkanen-</a>                                                                                                                                                                                                                                                                                                                           |

|                          |                                                                                                                                                                                                                                                                                                                                                                                                                                                                                                                                                                                                                                                                     |
|--------------------------|---------------------------------------------------------------------------------------------------------------------------------------------------------------------------------------------------------------------------------------------------------------------------------------------------------------------------------------------------------------------------------------------------------------------------------------------------------------------------------------------------------------------------------------------------------------------------------------------------------------------------------------------------------------------|
|                          | <p>1999/var-klimaaendringer-skyld-i-decemberorkanen/<br/>         -first and foremost: not possible to link single weather events with global warming<br/>         -only statistical changes of weather phenomenon over long time period can be linked to climate change<br/>         -Decemberorkan could have taken place at the beginning or end of 20C even without increased Greenhouse effect and global warming<br/>         -not possible to say if Decemberorkanen caused by global warming<br/>         -if one asks if global temperature increase in 20C increases the risk of powerful Danish hurricanes in period 1990-1999, answer is clearly no</p> |
| Air Worldwide (20191219) | <p>Air Worldwide, Three severe storms together were a wake-up call, 19Dec2019.<br/>         -Dec 1999 storms were a departure from the expected trend so insurance companies were caught out.</p>                                                                                                                                                                                                                                                                                                                                                                                                                                                                   |

Table SL64. Baltic Sea events (arranged by year and then alphabetically)

| Source                           | Full Reference and Notes                                                                                                                                                                                                                                                                                                                                                                                                                                                                                                                                                                                                                                             |
|----------------------------------|----------------------------------------------------------------------------------------------------------------------------------------------------------------------------------------------------------------------------------------------------------------------------------------------------------------------------------------------------------------------------------------------------------------------------------------------------------------------------------------------------------------------------------------------------------------------------------------------------------------------------------------------------------------------|
| Lloyd's Casualty Week (19991210) | <p>Lloyd's Casualty Week, vol.318, No.11, Dec10, 1999<br/>           -Baltica<br/>           -Friedrich Russ<br/>           -unidentified ship lost timber Finnish coast<br/>           -Vana Tallinn tug assistance to reach Helsinki</p>                                                                                                                                                                                                                                                                                                                                                                                                                           |
| Lloyd's Casualty Week (19991217) | <p>Lloyds Casualty Week, vol318, No12, 17Dec1999<br/>           -Latvia, Liepaja: overturned fishing boat fatalities<br/>           -Latvia and Lithuania: power cuts<br/>           -Poland: Gydnia collapsed crane; blocked rail from Warsaw northward<br/>           -air crash Moscow</p>                                                                                                                                                                                                                                                                                                                                                                        |
| RWS (1999)                       | <p>RWS, Verslag van de Stormvloed van 3 en 4 december 1999 (SR79), Ministerie van Verkeer en Waterstaat, Directoraat-Generaal Rijkswaterstaat, Rijksinstituut voor Kust en Zee, Stormvloedwaarschuwingsdienst, Postbus 20907, 2500EX 's-Gravenhage, 's-Gravenhage, december 1999.<br/>           -emergency services fully engaged in N Germany, Denmark, S Sweden<br/>           -storm trajectory northward in Baltic Sea into Gulf of Bothnia</p>                                                                                                                                                                                                                 |
| Nielsen and Nielsen (2000)       | <p>Nielsen, Jacob Woge and Nielsen, Mads Hvid, Stormfloden forårsaget af orkanen den 3. december 1999, Vejret, 82, 8-14, Februar 2000<br/>           -record low water levels in western Baltic over 120y measurement record.<br/>           -many tide gauges left dry<br/>           -Baltic seiching</p>                                                                                                                                                                                                                                                                                                                                                          |
| UN/ECE (2000)                    | <p>UN/ECE Timber Committee, Chapter 3. Effects of the December 1999 storms on European timber markets, ECE/FAO Forest Products Annual Market Review, 1999-2000, 15pp, 2000, Timber Bulletin, Vol LIII, ECE/TIM/BULL/53/3 [pdf document properties: title=3stormdamageFIN.PDF; author=najera; datestamp=15/08/2000] <a href="https://www.unecce.org/fileadmin/DAM/timber/docs/rev-00/rev00.htm">https://www.unecce.org/fileadmin/DAM/timber/docs/rev-00/rev00.htm</a><br/>           -reports forest damage Sweden, Poland, Lithuania</p>                                                                                                                             |
| DWD (20020528)                   | <p>DWD, Orkantief 'Anatol' von 3./4. Dezember 1999 (5pp), <a href="https://www.dwd.de/DE/leistungen/besondereereignisse/stuerme/19991204_orkantief_anatol.pdf">https://www.dwd.de/DE/leistungen/besondereereignisse/stuerme/19991204_orkantief_anatol.pdf</a> [pdf document properties: datestamp: 28May2002]<br/>           -strong wind gusts in southern and central Baltic</p>                                                                                                                                                                                                                                                                                   |
| Munich Re (2002)                 | <p>Munich Re, Winter Storms in Europe (II), Analysis of 1999 losses and loss potentials, Muenchener Rueck, Munich Re Group, 76pp, 2002<br/>           -gust field strong in Baltic Sea area on 4Dec2003</p>                                                                                                                                                                                                                                                                                                                                                                                                                                                          |
| Nilsson et al (2007)             | <p>Nilsson C, S Goyette, L Barring, Relating forest damage data to the wind field from high-resolution RCM simulations: case study of Anatol striking Sweden in December 1999, Global and Planetary Change, 57, 161-176, 2007.<br/>           -low pressure filled in as it crossed Baltic Sea</p>                                                                                                                                                                                                                                                                                                                                                                   |
| Tatge (2009)                     | <p>Tatge, Yoern, Looking back, looking forward: Anatol, Lothar and Martin ten years later, 09Dec2009. <a href="https://www.air-worldwide.com/publications/air-currents/looking-back-looking-forward-anatol-lothar-and-martin-ten-years-later/">https://www.air-worldwide.com/publications/air-currents/looking-back-looking-forward-anatol-lothar-and-martin-ten-years-later/</a><br/>           -Sweden, Poland, Latvia, Lithuania, Russia affected by storm</p>                                                                                                                                                                                                    |
| Cappelen et al (2018b)           | <p>Cappelen J, S Olufsen, MH Ribergaard, JW Nielsen, T Schmith, N Hansen, Stormfloden under decemberorkanen, updated 25Jun2018b, <a href="https://www.dmi.dk/vejr-og-atmosfare/temaforside-decemberorkanen-1999/stormfloden-under-decemberorkanen/">https://www.dmi.dk/vejr-og-atmosfare/temaforside-decemberorkanen-1999/stormfloden-under-decemberorkanen/</a><br/>           -in indre dansk farvand, east facing coasts dry; harbours had yachts luying on ground<br/>           -water levels fell to 2m below normal; lowest ever registered<br/>           -lost water sent into Baltic and turned back in course of Friday as high water S of Baelthavet</p> |
| Cappelen et al (2018e)           | <p>Cappelen J, S Olufsen, MH Ribergaard, JW Nielsen, T Schmith, N Hansen, Orkan passerer, updated 25Jun2018e, <a href="https://www.dmi.dk/vejr-og-atmosfare/temaforside-decemberorkanen-1999/orkanen-passerer/">https://www.dmi.dk/vejr-og-atmosfare/temaforside-decemberorkanen-1999/orkanen-passerer/</a><br/>           -hurricane force winds reach Kastrup 2100MET 3Dec1999; at this time Bornholm also has increase of wind</p>                                                                                                                                                                                                                                |

Table SL65. Aftermath: new defenses; new design criteria; assessment of climate change; model problems (arranged by year and then alphabetically)

| Source         | Full Reference and Notes                                                                                                                                                                                                                                                                                                                                                                                   |
|----------------|------------------------------------------------------------------------------------------------------------------------------------------------------------------------------------------------------------------------------------------------------------------------------------------------------------------------------------------------------------------------------------------------------------|
| DMI (19991209) | <p>DMI, Rapport. Orkanen over Danmark den 3.-4. december 1999, Danmarks Meteorologiske Institut, Lyngbyvej 100, DK-2100 Kobenhaven 0, 9Dec1999.<br/>           -investigation of error in weather model<br/>           -tests to see if weather and water level models would be improved by more advanced models and finer resolution<br/>           -DMI to work more closely with emergency services</p> |
| Focus (1999)   | <p>Focus, Strandfresser Anatol, Nr.50, 1999 (correspondent Birte Siedenburg), <a href="https://www.focus.de/politik/deutschland/sylt-strandfresser-anatol_aid_178994.html">https://www.focus.de/politik/deutschland/sylt-strandfresser-anatol_aid_178994.html</a><br/>           -Land Schleswig-Holstein government to spent 12 million DM for beach nourishment; Hartmut Mueller</p>                     |



|                                              |                                                                                                                                                                                                                                                                                                                                                                                                                                                                                                                                                                                                                                                                                                                                                                                                                                                                                                                                                                                                                                                                                                                         |
|----------------------------------------------|-------------------------------------------------------------------------------------------------------------------------------------------------------------------------------------------------------------------------------------------------------------------------------------------------------------------------------------------------------------------------------------------------------------------------------------------------------------------------------------------------------------------------------------------------------------------------------------------------------------------------------------------------------------------------------------------------------------------------------------------------------------------------------------------------------------------------------------------------------------------------------------------------------------------------------------------------------------------------------------------------------------------------------------------------------------------------------------------------------------------------|
|                                              | burgereister of Gemeinde Hoernum feels that 25 million DM should be committed to safeguard island                                                                                                                                                                                                                                                                                                                                                                                                                                                                                                                                                                                                                                                                                                                                                                                                                                                                                                                                                                                                                       |
| Aakjaer (2000)                               | Aakjaer AF, Orkanen i Nordsoen den 30. oktober 2000, Vejret, 85, 1-7, 2000<br>-discussion of Denmark storm surge 30Oct2000 and comparison with previous events including 3Dec1999                                                                                                                                                                                                                                                                                                                                                                                                                                                                                                                                                                                                                                                                                                                                                                                                                                                                                                                                       |
| Beredskapsstyrelsen Udviklingsenheden (2000) | Beredskapsstyrelsen Udviklingsenheden, Den Samlede redningsbredsabssektors opgavelosning i forbindelse med orkanen d. 3.-4. december og stormen d. 17 december 1999 - En Tvaergeraende evaluering og erfaringsopsamling, Februar 2000, Beredskapsstyrelsen, Beredskabsudviklingsenheden, Datavej 16, 3460 Birkerød, Telefon: 4590 6000, Telefax: 4590 6060, E-mail: bue@brs.dk, Internet: www.brs.dk<br>-more effective forecast of 17Dec1999 storm as result of forecast deficiencies during Anatol                                                                                                                                                                                                                                                                                                                                                                                                                                                                                                                                                                                                                    |
| Kristensen et al (1999)                      | Kristensen L, O Rathmann, SO Hansen, Extreme wind in Denmark, Journal of Wind Engineering and Industrial Aerodynamics, 87, 147-166, 2000.<br>-recommendation that the WASP correction method for Kegnaes wind speed should be reviewed; standard wind speed for Storm Anatol was too low considering the damage that occurred.                                                                                                                                                                                                                                                                                                                                                                                                                                                                                                                                                                                                                                                                                                                                                                                          |
| Mann and Hansen (2000)                       | Mann AJ, SO Hansen, En storm gor ingen norm, Vejret, no1. 22.Argang, 82, pp.28-34, Februar 2000.<br>-revision of Danish construction standards started 1995; dated 1998<br>-shorter time period for gust definition; emphasis on short period turbulence<br>-higher thresholds for wind pressure<br>-recommendation for revision of construction standards to address roof tile and cladding damage                                                                                                                                                                                                                                                                                                                                                                                                                                                                                                                                                                                                                                                                                                                     |
| Bresch et al (2000)                          | Bresch DN, M Bisping, G Lemcke, Storm over Europe. An underestimated risk, Swiss Re (Swiss Reinsurance Company), 27pp, 2000.<br>-premiums for re-insurance should be increased by 2 times                                                                                                                                                                                                                                                                                                                                                                                                                                                                                                                                                                                                                                                                                                                                                                                                                                                                                                                               |
| Nielsen and Nielsen (2000)                   | Nielsen, Jacob Woge and Nielsen, Mads Hvid, Stormfloden foraarsaget af orkanen den 3. december 1999, Vejret, 82, 8-14, Februar 2000<br>-DMI to improve surge prediction system                                                                                                                                                                                                                                                                                                                                                                                                                                                                                                                                                                                                                                                                                                                                                                                                                                                                                                                                          |
| Woetmann Nielsen (2000)                      | Woetmann Nielsen, AN, DMI-HIRLAM's forudsigelse af orkanen den 3.december 1999. Vejret, 82, pp. 19-23, februar 2000.<br>-model investigation to assess reasons for DMI met model forecast of storm<br>-ECMWF model zonal/meridional data discretization problem; 1h vs 6h time steps for data assimilation, HIRLAM grid discretization, spatial extension of HIRLAM grid.                                                                                                                                                                                                                                                                                                                                                                                                                                                                                                                                                                                                                                                                                                                                               |
| Buizza and Hollingsworth (2002)              | Buizza, Roberto and Anthony Hollingsworth, Storm prediction over Europe using the ECMWF ensemble prediction system, Meteorol. Appl., 9, 2002<br>-ECMWF has a program of continuous model improvement<br>-Dec1999 European storm s were a test of ensemble prediction system<br>-between Dec1992 and Dec1996 ECMWF ran EPS with 33 members with T63L19<br>-Dec1996 EPS resolution enhanced to TL159I31 with 51 ensemble members<br>-Oct1999 vertical levels increased to 40<br>-21Nov2000 EPS resolution increased to T1255L40 with initial conditions from hires analysis T1511L60                                                                                                                                                                                                                                                                                                                                                                                                                                                                                                                                      |
| Munich Re (2002)                             | Munich Re, Winter Storms in Europe (II), Analysis of 1999 losses and loss potentials, Muenchener Rueck, Munich Re Group, 76pp, 2002<br>-effects of climate change on wind storm events ... matter of controversial discussion<br>-ACACIA report 2000: assessment of potential effects & adaptations for climate change EUR<br>-precautionary principle<br>-IPCC2001: temperature increases 1.4-5.8C by end of century<br>-probably climate change effects<br>-N-S temperature gradient increase; circ of atmos accell; intensification wind storm (greenhouse effect incr energy input to atmos heat engine; switch in top gear)<br>* -blocking high central Europe; loss of snow cover permits storm entry<br>-convection processes increase; Germany lightning strokes incr exponentially with temp<br>-prolonged heat & drought in S & central Europe in summer; heat wave;<br>storms at end of heat waves cause damage:<br>3-4Jul2000: hailstorm Austria<br>6-7Jul2001: svere storm Germany<br>3Aug2001: hailstorm Germany<br>* -clear signs of climate change; exagerrating to develop horror scenarios for Europe |
| Nilsson et al (2004)                         | Nilsson C, I Stjernquist, L Barring, P Schlyter, AM Jonsson, H Samuelsson, Recorded storm damage in Swedish forests 1901-2000, Forest Ecology and Management 1999, 163-173, 2004<br>-Sweden storm forest study motivated by recent storm events (eg 1999)<br>-recent severe windstorms caused large damage & substantial economic loss in Europe regions<br>-viewed from climate change aspect small incr wind intensity can damage forests several orders magnitude<br>-storm damage in Swedish forests increased during the last century with peak 1980s; 1954 & 1969 worst years                                                                                                                                                                                                                                                                                                                                                                                                                                                                                                                                     |
| Mueller-Navarra (2005)                       | Mueller-Navarra, Sylvin, Sturmfluten. Land under an Nord- und Ostsee, in: Entfesselte Elemente-Der Mensch und die Kraefte der Natur, 5, 92-99, Guetersloh. Wissen-Media-Verl., 2005<br>-2005 project MUSE Modelluntersuchungen zu Sturmfluten met sehr geringen                                                                                                                                                                                                                                                                                                                                                                                                                                                                                                                                                                                                                                                                                                                                                                                                                                                         |
| Frank and Majewski (2006)                    | Frank, H, and D Majewski, Hindcasts of historic storms with the DWD models GME, LMQ and LMK using ERA-40 reanalysis, ECMWF Newsletter No. 109, autumn 2006, pp.16-21.<br>-NLWKN contracts DWD to simulate 22 Norderney storm1962-2002, probably in period 2002-2005                                                                                                                                                                                                                                                                                                                                                                                                                                                                                                                                                                                                                                                                                                                                                                                                                                                     |
| Schroevvers et al (2007)                     | Schroevvers M, J Dekker, R Groenendaal, H Peters, Inventory wave data for model calibration, Rijksinstituut voor Kust en Zee, Rijkswaterstaat, July, 2007 [pdf timestamp 07Jan2016]<br>-North Sea Coastal zone Managers Group (NSCMG) 21Apr2005 data exchange proposal<br>-organizations that cooperated during this inventory gather data for safety coastal defences, waterways, ecosystems<br>-focus on shallow water wave effects, especially leeside of islands.                                                                                                                                                                                                                                                                                                                                                                                                                                                                                                                                                                                                                                                   |
| Tatge (2009)                                 | Tatge, Yoern, Looking back, looking forward: Anatol, Lothar and Martin ten years later, 09Dec2009.<br><a href="https://www.air-worldwide.com/publications/air-currents/looking-back-looking-forward-anatol-lothar-and-martin-ten-years-later/">https://www.air-worldwide.com/publications/air-currents/looking-back-looking-forward-anatol-lothar-and-martin-ten-years-later/</a>                                                                                                                                                                                                                                                                                                                                                                                                                                                                                                                                                                                                                                                                                                                                       |

|                             |                                                                                                                                                                                                                                                                                                                                                                                                                                                                                                                                                                                                                                                                                                                                                                                                                                                                                                                                                                                                                                                                                                                                                                                                                                                                                                                                                                                                                                                                                                                                                                               |
|-----------------------------|-------------------------------------------------------------------------------------------------------------------------------------------------------------------------------------------------------------------------------------------------------------------------------------------------------------------------------------------------------------------------------------------------------------------------------------------------------------------------------------------------------------------------------------------------------------------------------------------------------------------------------------------------------------------------------------------------------------------------------------------------------------------------------------------------------------------------------------------------------------------------------------------------------------------------------------------------------------------------------------------------------------------------------------------------------------------------------------------------------------------------------------------------------------------------------------------------------------------------------------------------------------------------------------------------------------------------------------------------------------------------------------------------------------------------------------------------------------------------------------------------------------------------------------------------------------------------------|
|                             | <ul style="list-style-type: none"> <li>-aftermath: in 2000 most Scandinavian insurance companies significantly increased reinsurance coverage</li> <li>-new research on storm clustering (new phenomenon)</li> <li>-CRESTApplus initiative 2000: failed to gain wide acceptance</li> <li>-ACORD Association for Cooperative Operations Research and Development 2002</li> <li>-identified short-comings in Eur insurance industry: <ul style="list-style-type: none"> <li>a. ability to estimate sufficient coverage</li> <li>b. capacity to process large volumes of claims</li> <li>c. quality of data</li> </ul> </li> <li>-after event AIR released new generation extratropical cyclone model; incorporated NWP</li> <li>-first time catastrophe model incorporated physical modelling of met peril</li> </ul>                                                                                                                                                                                                                                                                                                                                                                                                                                                                                                                                                                                                                                                                                                                                                           |
| Fehrmann and Fackler (2010) | <p>Fehrmann, A. and A. Fackler, Offshore wind farms: risk and initial loss experience, Temple Insurance, a member of the Munich Re Group, 2010 [PDF timestamp: 09Mar2010] (last date reference 2001; last incident reference 2003)</p> <ul style="list-style-type: none"> <li>-review of offshore wind energy industry by re-insurance company notes 3 cases of severe storm damage (Canary Islands, Gujarat 1998, Anatol 1999).</li> <li>-Anatol 1999 storm track through area of proposed offshore wind farm concentration in southern North Sea; statement such a storm would be 100 year event.</li> </ul>                                                                                                                                                                                                                                                                                                                                                                                                                                                                                                                                                                                                                                                                                                                                                                                                                                                                                                                                                                |
| Herrling et al (2010)       | <p>Herrling Gerald, Heiko Knaack, Ralf Kaiser, Hanz D. Niemayer, Evaluation of design water levels at the Ems-Dollard estuary considering the effect of a storm surge barrier, 32nd Conference on Coastal Engineering 2010, Shanghai, China, 30Jun-05Jul2010. ed by JM Smith and P Lynett, pp. 3899-3917, [pdf document properties: title=ICCE2020_Ems_final, datestamp=15Sep2010</p> <ul style="list-style-type: none"> <li>-Gandersum surge barrier in operation from 2001; construction start 1998</li> <li>-Niedersachsen state government changes estimate of 100y sea level rise from 25cm to 50cm</li> </ul>                                                                                                                                                                                                                                                                                                                                                                                                                                                                                                                                                                                                                                                                                                                                                                                                                                                                                                                                                           |
| Gatey (2011)                | <p>Gatey, DA, The analysis of extreme synoptic winds, Ph.D. Thesis, University of Western Ontario, 2011. University of Western Ontario - Electronic Thesis and Dissertation Repository. Paper 268.</p> <ul style="list-style-type: none"> <li>-calculation of 50y return wind speeds for wind engineering design</li> <li>-Storm Anatol 1999 and Burn's Day storm Jan 1990 as case studies to test maximum wind predictions</li> </ul>                                                                                                                                                                                                                                                                                                                                                                                                                                                                                                                                                                                                                                                                                                                                                                                                                                                                                                                                                                                                                                                                                                                                        |
| Humbling (2013)             | <p>Humbling David, Weatherwatch: Our severe gales are not hurricanes, but they can be as deadly, The Guardian, 13Dec2013</p> <ul style="list-style-type: none"> <li>-Xaver had damaging storm surge but effective defences meant that insurance claims would be low</li> </ul>                                                                                                                                                                                                                                                                                                                                                                                                                                                                                                                                                                                                                                                                                                                                                                                                                                                                                                                                                                                                                                                                                                                                                                                                                                                                                                |
| Joyner (2013)               | <p>Joyner, T.A., Optimizing peak gust and maximum sustained wind speed estimates from mid-latitude wave cyclones, Louisiana State University Doctoral Dissertations, 421, 2013</p> <ul style="list-style-type: none"> <li>-development of better wind speed mapping methods for the insurance industry</li> </ul>                                                                                                                                                                                                                                                                                                                                                                                                                                                                                                                                                                                                                                                                                                                                                                                                                                                                                                                                                                                                                                                                                                                                                                                                                                                             |
| Danish Energy Agency (2015) | <p>Danish Energy Agency, Security of Electricity Supply in Denmark, 1st edition 2015, translated 2016, Danish Energy Agency, Amaliegade 44, 1256 Copenhagen K, ISBN 978-87-93180-15-4</p> <ul style="list-style-type: none"> <li>-Denmark power lines placed underground</li> <li>-green energy transition</li> <li>-energy grid links with surrounding countries</li> </ul>                                                                                                                                                                                                                                                                                                                                                                                                                                                                                                                                                                                                                                                                                                                                                                                                                                                                                                                                                                                                                                                                                                                                                                                                  |
| Decker (2018)               | <p>Decker, Lauge, Windthrow risk assessment of Douglas-fir stands in Denmark. A comparison study of Douglas-fir (<i>Pseudotsuga menziesii</i>) and Norway spruce (<i>Picea abies</i>), M.Sc. thesis, University of Copenhagen, submitted 6Aug2018 [pdf properties: title=Notatbog; author=Lauge Decker, Subject=SKOG303 - Silviculture and forest growth yield]</p> <p>* -recommendations from windthrow act Act 349 17May2000</p> <p>6.4. Norway spruce</p> <ul style="list-style-type: none"> <li>-important tree species introduced to many sites beyond native range</li> <li>-hot dry conditions from climate change creates suboptimal environments</li> <li>-expected to cease as productive species in England, S Finland and Sweden</li> </ul>                                                                                                                                                                                                                                                                                                                                                                                                                                                                                                                                                                                                                                                                                                                                                                                                                       |
| Air Worldwide (20191219)    | <p>Air Worldwide, Three severe storms together were a wake-up call, 19Dec2019.</p> <ul style="list-style-type: none"> <li>-using historical losses for risk assessment not sufficient</li> <li>-AIR Extratropical Cyclone Model gives comprehensive view of year-round risk for 22 European countries</li> <li>-model captures storm frequency and clustering that define hazard, and interannual variability</li> </ul>                                                                                                                                                                                                                                                                                                                                                                                                                                                                                                                                                                                                                                                                                                                                                                                                                                                                                                                                                                                                                                                                                                                                                      |
| Cappelen et al (2019g)      | <p>Cappelen J, S Olufsen, MH Ribergaard, JW Nielsen, T Schmith, H Hansen, Blev DMI klogere af decemberorkanen? updated 25Jun2018, <a href="https://www.dmi.dk/vejr-og-atmosfare/temaforside-decemberorkanen-1999/blev-dmi-klogere-af-decemberorkanen/">https://www.dmi.dk/vejr-og-atmosfare/temaforside-decemberorkanen-1999/blev-dmi-klogere-af-decemberorkanen/</a></p> <ul style="list-style-type: none"> <li>-DMI make contact with preparation authorities, and there was procedure in place for the next storm 14d later for authorities to receive information direction from DMI</li> <li>-one of the problems with the hurricane was that many did not know how violent it can be</li> <li>-this was followed up the following year, where DMI sent out special warnings to the public and authorities</li> <li>-blinking lamp on DMI website whenever violent weather expected</li> <li>-at the same time, work carried out by weather modellers to the find out whether the hurricane could be forecast perfectly</li> <li>-it was shown that a very good prognosis could be achieved even with a 15km model grid mesh when the model is driven on a large geographic area with good atmospheric data</li> <li>-today several prognoses can be carried out with short time between runs, eg every hour</li> <li>-prognoses are slightly different because they take account of uncertainties in the model and in atmospheric state</li> <li>-best forecast by considering an ensemble</li> <li>-ensemble permits assessment of uncertainty of prognosis</li> </ul> |
| Capellen (2019)             | <p>Capellen, John, Orkaner paa vore breddegrader, updated 8Jan2019 <a href="https://www.dmi.dk/vejr-og-atmosfare/temaforside-vind/orkaner-paa-vore-breddegrader/">https://www.dmi.dk/vejr-og-atmosfare/temaforside-vind/orkaner-paa-vore-breddegrader/</a>, (webapage downloaded 12Oct2020)</p> <ul style="list-style-type: none"> <li>-Danish storm naming convention starts 2013 with Storm Allan as first storm</li> </ul>                                                                                                                                                                                                                                                                                                                                                                                                                                                                                                                                                                                                                                                                                                                                                                                                                                                                                                                                                                                                                                                                                                                                                 |

Table SL66. Worst case storm surge situation (arranged by year and then alphabetically)

| Source                     | Full Reference and Notes                                                                                                                                                                                                                                                                                                                                                                                                                                                                                                                                                                                                                                                |
|----------------------------|-------------------------------------------------------------------------------------------------------------------------------------------------------------------------------------------------------------------------------------------------------------------------------------------------------------------------------------------------------------------------------------------------------------------------------------------------------------------------------------------------------------------------------------------------------------------------------------------------------------------------------------------------------------------------|
| Nielsen and Nielsen (2000) | Nielsen, Jacob Woge and Nielsen, Mads Hvid, Stormfloden foraarsaget af orkanen den 3. december 1999, Vejret, 82, 8-14, Februar 2000<br>-worst Esbjerg storm surge had been 1981                                                                                                                                                                                                                                                                                                                                                                                                                                                                                         |
| Rosenorn (2000)            | Rosenorn, Af Stig, De kraftigste storme i det tyvende aarhundrede in Denmark, Vejret, 82, 15-18, Februar 2000<br>-review of 4 worst Denmark storms and Anatol assessed to be most powerful                                                                                                                                                                                                                                                                                                                                                                                                                                                                              |
| Mueller-Navarra (2005)     | Mueller-Navarra, Sylvain, Sturmfluten. Land under an Nord- und Ostsee, in: Entfesselte Elemente-Der Mensch und die Kraefte der Natur, 5, 92-99, Guetersloh. Wissen-Media-Verl., 2005<br>-2005 project MUSE Modelluntersuchungen zu Sturmfluten met sehr geringen<br>-already in present climate conditions significantly greater storm & surges possible<br>-predicted water levels 1-1.5m higher than previous measurements<br>-western Baltic: only single well documented surge 12-13Nov1872; never reached since<br>-new research project to be initiated for Baltic                                                                                                |
| Jensen et al (2006)        | Jensen J, C Mudersbach, SH Mueller-Navarra, I Bork, C Koziar, V Renner, Modellgestuetzte Untersuchungen zu Sturmfluten mit sehr geringen Eintrittswahrscheinlichkeiten an der deutschen Nordseekueste, Die Kueste, 71, 123-167, 2006.<br>-from 50 member model ensemble, water levels could have been 1.4m higher during 1976 storm.<br>-'Ausgeloeset durch das Sturmtief Anatol im Dezember 1999 und den katastrophalen Sturmfluten in den vergangenen Jahrzehnten (z.B. in den Jahren 1962 un 1976) sind aktuell wieder Fragen nach moeglichen Hoeehen von Sturmfluten laut geworden'<br>-Gumbel type III distribution and asymptotic maximum water level at Cuxhaven |
| Schwierz et al (2010)      | Schwierz C, P Koellnet-Heck, E Zenklusen Mutter, DN Bresch, P-L Vidale, M Wild, C Schaer, Modelling European winter wind storm losses in current and future climate, Climatic Change, 101, 485-514, 2010.<br>-assessment of 100y insurance loss storm                                                                                                                                                                                                                                                                                                                                                                                                                   |
| Capellen (2019)            | Capellen, John, Orkaner paa vore breddegrader, updated 8Jan2019 <a href="https://www.dmi.dk/vejr-og-atmosfare/temaforside-vind/orkaner-paa-vore-breddegrader/">https://www.dmi.dk/vejr-og-atmosfare/temaforside-vind/orkaner-paa-vore-breddegrader/</a> , (webapage downloaded 12Oct2020)<br>-surge would have been at same level as 11Oct1634 (worst Waddensee surge ever 6.12m)                                                                                                                                                                                                                                                                                       |

Table SL67. Damage costs; insurance losses (arranged by year and then alphabetically)

| Source                                       | Full Reference and Notes                                                                                                                                                                                                                                                                                                                                                                                                                                                                                                                                                                                                                                                                                                                                                                                                                                                                                                       |
|----------------------------------------------|--------------------------------------------------------------------------------------------------------------------------------------------------------------------------------------------------------------------------------------------------------------------------------------------------------------------------------------------------------------------------------------------------------------------------------------------------------------------------------------------------------------------------------------------------------------------------------------------------------------------------------------------------------------------------------------------------------------------------------------------------------------------------------------------------------------------------------------------------------------------------------------------------------------------------------|
| Lloyds Casualty Week (19991217)              | Lloyds Casualty Week, vol318, No12, 17Dec1999<br>-Danish Insurance Information Service: cost could be 1 billion kronur; previous record storm damage 1981 827 million kronur                                                                                                                                                                                                                                                                                                                                                                                                                                                                                                                                                                                                                                                                                                                                                   |
| Beredskapsstyrelsen Udviklingsenheden (2000) | Beredskapsstyrelsen Udviklingsenheden, Den Samlede redningsbredskabssektors opgavelosning i forbindelse med orkanen d. 3.-4. december og stormen d. 17 december 1999 - En Tvaergaende evaluering og erfaringsopsamling. Februar 2000, Beredskabsstyrelsen, Beredskabsudviklingsenheden, Datavej 16, 3460 Birkerød, Telefon: 4590 6000, Telefax: 4590 6060, E-mail: bue@brs.dk, Internet: www.brs.dk<br>-350,000 damage cases with value of 8 billion DKK                                                                                                                                                                                                                                                                                                                                                                                                                                                                       |
| Bresch et al (2000)                          | Bresch DN, M Bisping, G Lemcke, Storm over Europe. An underestimated risk, Swiss Re (Swiss Reinsurance Company), 27pp, 2000.<br>-listing of winter storm insurance losses from 1976; Anatol at rank 6/10<br>-Lothar/Martin caused solvency problems for French insurance companies<br>-French companies overwhelms by large numbers of small claims (3 million)<br>-importance of deductables to prevent swamping of processing procedure; should be 1% of total cover<br>-Lothar damaged 60% roofs in Paris area; 80% of buildings outside.                                                                                                                                                                                                                                                                                                                                                                                   |
| Lemcke and Schibli (2000)                    | Lemcke G and F Schibli, Storm over Europe - an underestimated risk, 10Oct2000CET press release. [pdf document properties: 19Jul2007]<br>-problems with insurance priemium assessment after Dec 1999 storms                                                                                                                                                                                                                                                                                                                                                                                                                                                                                                                                                                                                                                                                                                                     |
| Mann and Hansen (2000)                       | Mann AJ, SO Hansen, En storm gor ingen norm, Vejret, no1. 22.Argang, 82, pp.28-34, Februar 2000.<br>-increasing estimates of insurance loss in months after storm starting from 1-2 billion DKR to 8 billion DKR in Feb 2000                                                                                                                                                                                                                                                                                                                                                                                                                                                                                                                                                                                                                                                                                                   |
| Tatge (2009)                                 | Tatge, Yoern, Looking back, looking forward: Anatol, Lothar and Martin ten years later, 09Dec2009. <a href="https://www.air-worldwide.com/publications/air-currents/looking-back-looking-forward-anatol-lothar-and-martin-ten-years-later/">https://www.air-worldwide.com/publications/air-currents/looking-back-looking-forward-anatol-lothar-and-martin-ten-years-later/</a><br>-600000 individual insured losses; >2 billion EUR (1999)<br>-most destructive impact on Denmark<br>-before Anatol, largest Denmark insured loss from a storm was about 120 mill EUR in 1981<br>-Anatol insured loss 2 bill EUR (1999) order of magnitude larger<br>-claims adjusters overwhelmed by number of claims to service; as much as 1/10 of population of country<br>-to facilitate processing: agents sent payments up to threshold without review<br>-this probably artificially increased Anatol's actual insured loss in Denmark |
| Schwierz et al (2010)                        | Schwierz C, P Koellnet-Heck, E Zenklusen Mutter, DN Bresch, P-L Vidale, M Wild, C Schaer, Modelling European winter wind storm losses in current and future climate, Climatic Change, 101, 485-514, 2010.<br>-1970s mean yearly insured loss 2-3billion UDS2006; 2001-2006 yearly is 30 bill USD 2006<br>-contributing factors: increasing assets as risk, larger concent in exposed areas<br>-Europe: volatility of losses exacerbated by clustering of severe storms:<br>-4 in 1990: 14.6bn USD2006 from Herta (1.3), Vivian (4.9), Wiebke (1.2), Daria (7.2)<br>-3 in 1999: 12.2bn USD2006 from Anatol (2.3), Lothar (7.0), Martin (2.9)                                                                                                                                                                                                                                                                                    |
| Gardiner et al. (2012)                       | Gardiner B, K Blennow, J-M Carnus, P Fleischer, F Ingemarson, G Landmann, M Lindner, M Marzano, B Nicoll, C Orazio, J-L Peyron, M-P Reviron, M-J Schelhaas, A Schuck, M Spielmann, T Usbeck, Destructive storm in European Forests: Past and Forthcoming Impacts, European Forest Institute, Atlantic European Regional Office - EFIAtlantic [pdf document properties: author=Barry Gardiner, datestamp=09Mar2012]<br>-cost of Anatol forest damage for Sweden                                                                                                                                                                                                                                                                                                                                                                                                                                                                 |
| AON Benfield (2013)                          | AON Benfield, Historie von 1703 bis 2012: Winterstuerme in Europea, Stand: Januar 2013                                                                                                                                                                                                                                                                                                                                                                                                                                                                                                                                                                                                                                                                                                                                                                                                                                         |

|                             |                                                                                                                                                                                                                                                                                                                                                                                                                                                                                                                                                                                                                                                                                                                                                                                                                                 |
|-----------------------------|---------------------------------------------------------------------------------------------------------------------------------------------------------------------------------------------------------------------------------------------------------------------------------------------------------------------------------------------------------------------------------------------------------------------------------------------------------------------------------------------------------------------------------------------------------------------------------------------------------------------------------------------------------------------------------------------------------------------------------------------------------------------------------------------------------------------------------|
|                             | -insured damage in Germany 290 mill EUR indexed to year 2012                                                                                                                                                                                                                                                                                                                                                                                                                                                                                                                                                                                                                                                                                                                                                                    |
| Roberts et al (2014)        | Roberts JF, AJ Champion, LC Dawkins, KI Hodes, LC Shaffrey, DB Stephenson, MA Stringer, HE Thornton, DB Youngman, The XWS open access catalogue of extreme European windstorms from 1979 to 2012, Nat. Hazards Earth Syst. Sci, 14, 2487-2501, 2014<br>-list of 23 top insurance storms in period 1979-2013; Anatol is rank 9                                                                                                                                                                                                                                                                                                                                                                                                                                                                                                   |
| RMS (2014)                  | RMS, 2013-2014 Winter Storms in Europe. An Insurance and Catastrophe Modeling Perspective. RMS White Paper. [PDF TIMESTAMP 11Mar2014]<br>-insurance losses for winter 2013-2014 not likely to reach levels of Anatol/Lothar/Martin in 1999 (13.9 billion USD), Kyrill in 2007 (6.8 billion USD), Xynthia in 2010 (2.9 billion USD) or summer UK flooding 2007 (6 billion USD)                                                                                                                                                                                                                                                                                                                                                                                                                                                   |
| Thejournal.ie (20151214)    | thejournal.ie, The deadliest storms to ever hit Europe, 14Dec2015 0610AM, <a href="https://www.thejournal.ie/europe-storms-2497164-Dec2015/">https://www.thejournal.ie/europe-storms-2497164-Dec2015/</a> , accessed 10Dec2020<br>-Anatol monetary loss rank10 at 2.9b EUR; Lothar rank 1 at 10.6b EUR                                                                                                                                                                                                                                                                                                                                                                                                                                                                                                                          |
| Cappelen et al (2018d)      | Cappelen J, S Olufsen, MH Ribergaard, JW Nielsen, T Schmith, H Hansen, Dagen derpaa, updated 25Jun2018d, <a href="https://www.dmi.dk/vejro-og-atmosfare/temaforside-decemberorkanen-1999/dagen-derpaa/">https://www.dmi.dk/vejro-og-atmosfare/temaforside-decemberorkanen-1999/dagen-derpaa/</a><br>-insurance companies assess damage at 13 billion DKR<br>-Saturday afternoon on 4Dec Falck 6000-7000 calls on storm damage                                                                                                                                                                                                                                                                                                                                                                                                   |
| Air Worldwide (20191219)    | Air Worldwide, Three severe storms together were a wake-up call, 19Dec2019.<br>-large volume of small claims for European extratropical storm can be equivalent to tropical hurricane<br>-extratropical cyclones last longer and impact larger area<br>-Anatol had most destructive impact on Denmark; country's largest insured loss ever<br>-French insurance market overwhelmed with >3 million claims, mostly from residential sector<br>-impact on reinsurance market<br>-Denmark: Anatol completely exhausted many reinsurance covers<br>-from low probability of Daria-Vivian-Wiebke 1990 event, many insur companies decided reinsurance unnecc<br>-solvency problems<br>-France: reinsurance based on 1990 event but wind speeds of Lathar & Martin 30% higher<br>-most reinsurance programs exhausted by Lothar alone |
| Buchana and McSharry (2019) | Buchana P, PR McSharry, Windstorm risk assessment for offshore wind farms in the North Sea, Wind Energy, 22, 1219-1229, 2019<br>-US hurricane losses vary exponentially with wind speed at 5% per m/s (Murnane and Elsner)<br>-power law relationship between losses and maximum wind speed: 4 to 10<br>-small changes wind speed can have devastating impacts                                                                                                                                                                                                                                                                                                                                                                                                                                                                  |
| Cappelen (2019)             | Capellen, John, Orkaner paa vore breddegrader, updated 8Jan2019 <a href="https://www.dmi.dk/vejro-og-atmosfare/temaforside-vind/orkaner-paa-vore-breddegrader/">https://www.dmi.dk/vejro-og-atmosfare/temaforside-vind/orkaner-paa-vore-breddegrader/</a> , (webapage downloaded 12Oct2020)<br>-damage at ~13 billion DKK                                                                                                                                                                                                                                                                                                                                                                                                                                                                                                       |
| World Energy Council (2019) | World Energy Council, Case Study Series, Extreme Weather, Windstorms France December 1999, <a href="https://www.worldenergy.org/assets/downloads/Windstorms_France_-_Extreme_weather_conditions_SEP_2019.pdf">https://www.worldenergy.org/assets/downloads/Windstorms_France_-_Extreme_weather_conditions_SEP_2019.pdf</a> , pdf date stamp: 11Oct2019<br>-2 bill EUR insurance loss for Denmark; insurers believed such a loss was impossible.                                                                                                                                                                                                                                                                                                                                                                                 |

Table SL68. Online data sets (arranged by year and then alphabetically)

| Source                      | Full Reference and Notes                                                                                                                                                                                                                                                                                                                          |
|-----------------------------|---------------------------------------------------------------------------------------------------------------------------------------------------------------------------------------------------------------------------------------------------------------------------------------------------------------------------------------------------|
| Nilsson et al. (2007)       | Nilsson C, S Goyette, L Barring, Relating forest damage data to the wind field from high-resolution RCM simulations: case study of Anatol striking Sweden in December 1999, Global and Planetary Change, 57, 161-176, 2007.<br>-NCEP-NCAR reanalysis fields<br>-Sweden station data<br>-Copenhagen radiosonde profiles from University of Wyoming |
| Buchana and McSharry (2019) | Buchana P, PR McSharry, Windstorm risk assessment for offshore wind farms in the North Sea, Wind Energy, 22, 1219-1229, 2019<br>-extreme wind storm XWS catalog                                                                                                                                                                                   |

Table SL69. Onshore/offshore wind energy policy and historical development

| Source                         | Full Reference and Notes                                                                                                                                                                                                                                                                                                                                                                                                                                                                                                                                                                                                                                                                                                                                                                                                                                                                                                                                                                                                                       |
|--------------------------------|------------------------------------------------------------------------------------------------------------------------------------------------------------------------------------------------------------------------------------------------------------------------------------------------------------------------------------------------------------------------------------------------------------------------------------------------------------------------------------------------------------------------------------------------------------------------------------------------------------------------------------------------------------------------------------------------------------------------------------------------------------------------------------------------------------------------------------------------------------------------------------------------------------------------------------------------------------------------------------------------------------------------------------------------|
| Neckelmann and Petersen (2000) | Neckelmann, S. and J. Petersen, Evaluation of the stand-alone wind and wave measurement systems for Horns Rev 150MW offshore wind farm in Denmark, OWEMES 2000, ATENA, Rome, Sicily, pp.17-27, 2000<br>-feasibility study of offshore wind energy in Danish water 1995<br>-onshore wind turbines in Denmark reached limit and 1500 MW onshore goal reached in 1999<br>-Danish government resolution in 1998 for 5 offshore wind farms to be constructed during 2002-2008 with 150MW capacity each to operate for 20y period<br>-Horns Rev met program started May1999, marine program started June 1999.                                                                                                                                                                                                                                                                                                                                                                                                                                       |
| IEA (2001)                     | IEA, Wind Energy Annual Report 2000, International Energy Agency, National Renewable Energy Laboratory, May, 2001. (Author Ian Fletcher) pdf document properties: datestamp: 08Jul2005;<br>-IEA founded in 1974 within framework of OECD Organization for Economic Cooperation and Development<br>-2000 another good year for wind energy; wind supplies enough for 75% Denmark needs<br>-advantages: rapid capacity building, removes fuel cost uncertainties; incr diversity energy supp<br>-Germany & Spain had very high rate turbine installation; Denmark with exceptional year<br>-offshore wind energy increased again in 2000.<br>-projects developed in UK (4MW), Denmark (40MW), Sweden (10MW)<br>-Denmark: strategy based on government action plan Energy 21 & setting ceilings on CO2 emissions<br>-Denmark: renewable energy quotas announced 1999<br>-Denmark: 20% of electricity consumption covered by renewables end 2003<br>-Denmark: land turbine will form signif part of expansion; first 350MW of offshore wind energy |

|                             |                                                                                                                                                                                                                                                                                                                                                                                                                                                                                                                                                                                                                                                                                                                                                                                                                                                                                                                                                                                                                                                                                                                                                                                                                                                                                                                                                                                                      |
|-----------------------------|------------------------------------------------------------------------------------------------------------------------------------------------------------------------------------------------------------------------------------------------------------------------------------------------------------------------------------------------------------------------------------------------------------------------------------------------------------------------------------------------------------------------------------------------------------------------------------------------------------------------------------------------------------------------------------------------------------------------------------------------------------------------------------------------------------------------------------------------------------------------------------------------------------------------------------------------------------------------------------------------------------------------------------------------------------------------------------------------------------------------------------------------------------------------------------------------------------------------------------------------------------------------------------------------------------------------------------------------------------------------------------------------------|
|                             | <ul style="list-style-type: none"> <li>-Denmark: long term goal to reach 5500MW by 2030 of which 4000MW expected to be offshore</li> <li>-Denmark: wind energy targets 500MW in 2010 and 2000 in 2025.</li> <li>-6143 turbines Denmark 2000</li> </ul>                                                                                                                                                                                                                                                                                                                                                                                                                                                                                                                                                                                                                                                                                                                                                                                                                                                                                                                                                                                                                                                                                                                                               |
| Sommer (2003)               | <p>Sommer, A., Offshore measurements of wind and waves at Horns Rev &amp; Laeso, Denmark. European Seminar OWEMES 2003, Apr 10-12, 2003, Naples, Campania, Italy.</p> <ul style="list-style-type: none"> <li>-Danish government energy plan Energy21 installed capacity 5500MW by 2030, 4000MW offshore, 1500MW onshore</li> <li>-density onshore almost reached limit /w 1500MW in 1999</li> <li>-utilization offshore only way to reach energy goals in Energy21</li> <li>-feasibility study 1995; sites for 8000MW identified</li> <li>-large scale demonstration wind farms technically and economically feasible</li> <li>-Elsam/Eltra (W) &amp; Elkraft (E) ordered by Danish government 1998 to construct 5 farms 2002-2008 for 20y operation</li> </ul>                                                                                                                                                                                                                                                                                                                                                                                                                                                                                                                                                                                                                                      |
| Sahin (2004)                | <p>Sahin, AD, Progress and recent trends in wind energy, Progress in Energy and Combustion Science, 30, 501-543, 2004.</p> <ul style="list-style-type: none"> <li>-historical development of wind energy</li> <li>-motivated by energy crises, pollution reduction, greenhouse gas reduction.</li> </ul>                                                                                                                                                                                                                                                                                                                                                                                                                                                                                                                                                                                                                                                                                                                                                                                                                                                                                                                                                                                                                                                                                             |
| Modern Power Systems (2004) | <p>Modern Power Systems, Horns Rev reveals the real hazards of offshore wind, <a href="https://www.modernpowersystems.com/features/featurehorns-rev-reveals-the-real-hazards-of-offshore-wind-720/">https://www.modernpowersystems.com/features/featurehorns-rev-reveals-the-real-hazards-of-offshore-wind-720/</a>, 01Oct2004</p> <ul style="list-style-type: none"> <li>-Horns Rev started 2002; salt corrosion and other problems started Aug2003; turbines to shore summer 2004</li> <li>-Vestas turbines at Kentish Flats, Scroby Sands, Frederikshavn Denmark.</li> <li>-advantages/disadvantages offshore wind farms.</li> </ul>                                                                                                                                                                                                                                                                                                                                                                                                                                                                                                                                                                                                                                                                                                                                                              |
| DEA (2005)                  | <p>DEA, Offshore Wind Power. Danish Experiences and Solutions. Danish Energy Authority, October, 2005. [pdf properties: datestamp: 24Oct2005]</p> <ul style="list-style-type: none"> <li>-Denmark 1980s most energy from coal; acidification of forest &amp; lakes</li> <li>-2005: renewable energy 28% Danish electricity; 19% from wind power</li> <li>-wind power increasingly competitive wrt other energy with higher oil prices &amp; CO2 tax</li> <li>-amount of renewable energy Denmark could reach 80% by 2025</li> <li>-significant part of expansion large offshore wind farms</li> <li>-FIG2.2. Total installed capacity and number of wind turbines 1980-2004, calced on basis of Danish Energy Authority's basic data registry.<br/>NOTE: 6200 turbines in operation in 1999 with 2100MW installed capacity</li> <li>-FIG_p3. Vindeby west of Lolland was the world's first offshore wind farm. It has 11X450kW wind turbines. It provided Danish energy companies with experience</li> <li>*-TAB_p4. Existing Danish wind farms - status as of autumn 2005<br/>First offshore windfarm Vindeby Falster 1991<br/>Second offshore windfarm Tuno Knob Odder 1995</li> <li>-wind power employs 20000 people directly &amp; indirectly</li> <li>-3billion EUR turnover</li> <li>-wind power accounts for 4% Danish industrial production</li> <li>8.3. 40% global market share</li> </ul> |
| Elsam (2005)                | <p>Elsam, Horns Rev - daenisches Windkraftwerk in der Nordsee, Stahlbau, 451, 73, 2005, pdf datestamp: 02Jun2005</p> <ul style="list-style-type: none"> <li>-significant contribution to Danish goal to reduce CO2 emissions; 2% of Danish energy use</li> </ul>                                                                                                                                                                                                                                                                                                                                                                                                                                                                                                                                                                                                                                                                                                                                                                                                                                                                                                                                                                                                                                                                                                                                     |
| Decker (2018)               | <p>Decker, Lauge, Windthrow risk assessment of Douglas-fir stands in Denmark. A comparison study of Douglas-fir (<i>Pseudotsuga menziesii</i>) and Norway spruce (<i>Picea abies</i>), M.Sc. thesis, University of Copenhagen, submitted 6Aug2018 [pdf properties: title=Notatbog; author=Lauge Decker, Subject=SKOG303 - Silviculture and forest growth yield]</p> <ul style="list-style-type: none"> <li>-FIG6.1. Wind resource map of Denmark at 45m height above ground, mean windspeed meas. Data from EMD2001. Orange points mark forest with wind throw. Map drawn for wind energy</li> </ul>                                                                                                                                                                                                                                                                                                                                                                                                                                                                                                                                                                                                                                                                                                                                                                                                 |
| Buchana and McSharry (2019) | <p>Buchana P, PR McSharry, Windstorm risk assessment for offshore wind farms in the North Sea, Wind Energy, 22, 1219-1229, 2019</p> <ul style="list-style-type: none"> <li>-first offshore wind farm Denmark 1991</li> <li>-2017: 84% of all offshore wind turbines located off coast of 10 European countries</li> <li>-2017: 18814MW offshore wind energy installed globally</li> <li>-offshore wind energy advantages: higher resources, NIMBY opposition weaker</li> <li>-Caithness wind farm reference: 370 blade failures, 299 fire cases, 189 structural instances</li> </ul>                                                                                                                                                                                                                                                                                                                                                                                                                                                                                                                                                                                                                                                                                                                                                                                                                 |

Table SL70. Context and background information where storm not mentioned (arranged by year and then alphabetically)

| Source            | Full Reference and Notes                                                                                                                                                                                                                                                                                                                                                                                                                                                                                                                                                              |
|-------------------|---------------------------------------------------------------------------------------------------------------------------------------------------------------------------------------------------------------------------------------------------------------------------------------------------------------------------------------------------------------------------------------------------------------------------------------------------------------------------------------------------------------------------------------------------------------------------------------|
| Rossiter (1958)   | <p>Rossiter JR, Storm surges in the North Sea, 11 to 30 December 1954, Philosophical Transactions of the Royal Society of London, Series A, 251, No. 991, 139-160, 1958.</p> <ul style="list-style-type: none"> <li>-return surge proposed by Corkan (1958) to explain 36h oscillation of low frequency component</li> <li>-positive surge heavily damped; negative surge with strong tendency to oscillations</li> <li>-longitudinal seiche period 30-40h; transverse seiche period 12h</li> <li>-ad hoc procedure for placing tide gauge data on common reference level.</li> </ul> |
| Keers (1966)      | <p>Keers, JF, The meteorological conditions leading to storm surges in the North Sea, Meteorological Magazine, London, 95, (1130), 261-272, Sept. 1966</p> <ul style="list-style-type: none"> <li>-classification of North Sea storm surge</li> <li>-North Sea positive surge often preceded by negative surge; reconance effect</li> </ul>                                                                                                                                                                                                                                           |
| Whitehouse (1977) | <p>Whitehouse, P., Wave Phenomenon in the North Sea, The Marine Observer, XLVII, No. 257, pp.128-129, July 1977 (Met.O. 904)</p> <ul style="list-style-type: none"> <li>-freak wave kill zone in northern North Sea</li> </ul>                                                                                                                                                                                                                                                                                                                                                        |

|                                      |                                                                                                                                                                                                                                                                                                                                                                                                                                                                                                                                                                                                                                                                                                               |
|--------------------------------------|---------------------------------------------------------------------------------------------------------------------------------------------------------------------------------------------------------------------------------------------------------------------------------------------------------------------------------------------------------------------------------------------------------------------------------------------------------------------------------------------------------------------------------------------------------------------------------------------------------------------------------------------------------------------------------------------------------------|
|                                      | <ul style="list-style-type: none"> <li>-big wave conditions:</li> <li>-SE gale from depression to W with front moving ENE across North Sea</li> <li>-wind conditions unremarkable: Bf6-9; v low cloud, visibility 1-2nm, falling pressure</li> <li>-3h before passage of fronthigh waves out of all proportion to fetch: 'like an of boiling water'</li> <li>-wave heights change from 5-7m to 15-17m; regular pattern becomes irregular</li> <li>-sea coming from up to 90deg of wind direction; imposs to distinguish sea from swell</li> <li>-not particularly shallow water &amp; well away from Fisher banks</li> <li>-on 2 occasions major damage to ship; several occasions of minor damage</li> </ul> |
| Neu (1984)                           | <p>Neu HJA, Interannual variations and longer-term changes in sea state of the North Atlantic from 1970 to 1982, JGR, 89, 6397-6402, 1984.</p> <ul style="list-style-type: none"> <li>-changes in North Atlantic storminess; secular trend and 3- to 7-year fluctuation</li> </ul>                                                                                                                                                                                                                                                                                                                                                                                                                            |
| Carter and Draper (1988)             | <p>Carter DJT and L Draper, Has the north-east Atlantic become rougher? Nature, 332, p.494. 1988.</p> <ul style="list-style-type: none"> <li>-increase in Hs from 1960s to 1985 at Sevenstones Light Vessel Land's End</li> <li>-50y Hs increased from 12 m 1960 to 18m 1990</li> </ul>                                                                                                                                                                                                                                                                                                                                                                                                                       |
| Logue (1989)                         | <p>Logue JJ, The estimation of extreme wind speeds over standard terrain in Ireland, Technical Note No. 51, Meteorological Service, Dublin, May 1989</p> <ul style="list-style-type: none"> <li>-highest wind speeds in Ireland associated with extratropical cyclones</li> <li>-highest wind speeds within few 100km of low pressure center across a swath of width 100-200km on right hand side of track</li> </ul>                                                                                                                                                                                                                                                                                         |
| Gram-Jensen (1991)                   | <p>Gram-Jensen, Ib, Stormfloder, Danish Meteorological Institute, Scientific Report 91-1, Copenhagen, 1991</p> <ul style="list-style-type: none"> <li>-history of Danish storm surges to 1991</li> </ul>                                                                                                                                                                                                                                                                                                                                                                                                                                                                                                      |
| Schmidt and von Storch (1993)        | <p>Schmidt H and H von Storch, German Bight storms analyzed, Nature, 343,791, 1993</p> <ul style="list-style-type: none"> <li>-debate climate change and intensification of the extratropical storms</li> <li>-IPCC no stand because of lack of evidence</li> <li>-2 workshops Reykjavik 29-30March 1993 &amp; Bergen Nov30-Dec1, 1992</li> <li>Climate trends and future offshore Design and Operation Criteria hosted by DNMI; representatives from oil industry, cert agencies, scientists</li> <li>*-stationary time series over 100y</li> </ul>                                                                                                                                                          |
| Hogben (1994)                        | <p>Hogben, N, Increases in wave heights over the North Atlantic: A review of the evidence and some implications for the naval architect, Transactions of The Royal Institution of Naval Architects, W5, 93-101, 1994.</p> <ul style="list-style-type: none"> <li>-increases in North Atlantic wave height in recent decades; observed wave height &amp; instruments</li> <li>-evidence for increase in extreme waves unclear (50 year wave)</li> <li>-no corresponding increase in wind speed.</li> <li>-naval architects doubt wave atlases and wave spectral models forced by winds.</li> </ul>                                                                                                             |
| Alexandersson et al (1998)           | <p>Alexandersson H, T Schmith, K Iden, H Tuomenvirta, Long-term variations of the storm climate over NW Europe, The Global Atmosphere and Ocean System, 6, 97-120, 1998</p> <ul style="list-style-type: none"> <li>-geostrophic wind from pressure triangle analysis in northeast Atlantic</li> <li>-clear increases in highest wind speedsfor many triangles northeast Atlantic</li> <li>-caution that recent trends may be broken</li> </ul>                                                                                                                                                                                                                                                                |
| Schmith et al (1998)                 | <p>Schmith T, E Kaas, TS Li, Northeast Atlantic winter storminess 1875-1995 re-analyzed, Climate Dynamics, 14, 529-536, 1998.</p> <ul style="list-style-type: none"> <li>-ongoing world debate climate change &amp; human influence</li> <li>-flagged by insurance (Berz and Conrad 1994) &amp; offshore industry</li> <li>* -climate change reports problematic: based on rumours &amp; inhomog quant (insur losses)</li> <li>-wind data unusable because of changing observation procedures &amp; instruments</li> <li>-importance of climate record length</li> <li>-analysis of new pressure data set from NE Atlantic stations; first difference pressure tendency</li> </ul>                            |
| Hjorteland et al (1999)              | <p>Hjorteland K, MJ Mes, AK Magnusson, Ekofisk Observed Weather Compared with Weather Predictions, Offshore Technology Conference, 3-6May, Houston, Texas, 1999, OTC-10768-MS</p> <ul style="list-style-type: none"> <li>-Ekofisk field came on stream 1971; subsidence was confirmed 1984</li> <li>-Ekofisk Extreme Wave Warning EXWW</li> <li>-DNMI wave forecasts at 12, 24, 48h &amp; 2,4,5,6 days advance weather and oceanography forecasts</li> </ul>                                                                                                                                                                                                                                                  |
| Lloyd's Casualty Week (19991210)     | <p>Lloyd's Casualty Week, vol.318, No.11, Dec10, 1999</p> <ul style="list-style-type: none"> <li>-storms and ship accidents in week before Anatol</li> </ul>                                                                                                                                                                                                                                                                                                                                                                                                                                                                                                                                                  |
| Norwegian Petroleum Directory (1999) | <p>Norwegian Petroleum Directorate, Offshore Norway 1999, Norwegian Petroleum Directorate, Prof. Olav Hanssens vei 10, P.O. Box 600, 4003 Stavanger, Norway [pdf document properties: datestamp: 24Jan2019]</p> <ul style="list-style-type: none"> <li>-overview of green water damage issues to the Norwegian FPSOs</li> <li>-FPSOs not designed according to marine standards of tankers</li> <li>-traditional platform installations designed to clear highest waves</li> <li>-measures imposed to protect against green water damage</li> <li>-Norwegian CO2 tax from 1Jan1991</li> </ul>                                                                                                                 |
| Winther-Jensen and Jorgensen (1999)  | <p>Winther-Jensen, M and ER Jorgensen, When real life wind speed exceeds design wind assumptions, 1999 European Wind Energy Conference, 1-5 March 1999, Nice, France pp220-223.</p> <ul style="list-style-type: none"> <li>-first case of large scale wind turbine collapse during a hurricane,</li> <li>-proposal to address accidental limit state case of 10000 year wind speed</li> <li>-expert team from DTU visits Porbandar sites in 1999.</li> </ul>                                                                                                                                                                                                                                                  |
| Ersdal and Kvitrud (2000)            | <p>Ersdal G and A Kvitrud, Green water on Norwegian production ships, Proceedings of the tenth (2000) International Offshore and Polar Engineering Conference, Seattle, USA, May 28- June 2, 2000, The International Society of Offshore and Polar Engineers, 2000</p> <ul style="list-style-type: none"> <li>-damage to FPSOs and FSUs in Norwegian and North Sea in period 1998-2000 from green water events</li> <li>-design criterion to take a 100y wave without any damage; 10000y without destruction</li> </ul>                                                                                                                                                                                       |
| Lemcke and Schibli (2000)            | <p>Lemcke G and F Schibli, Storm over Europe - an underestimated risk, 10Oct2000CET press release. [pdf document properties: 19Jul2007]</p>                                                                                                                                                                                                                                                                                                                                                                                                                                                                                                                                                                   |

|                                       |                                                                                                                                                                                                                                                                                                                                                                                                                                                                                                                                                                                                                                                                                                                                                                                                                                                                                                                                                                                                                                    |
|---------------------------------------|------------------------------------------------------------------------------------------------------------------------------------------------------------------------------------------------------------------------------------------------------------------------------------------------------------------------------------------------------------------------------------------------------------------------------------------------------------------------------------------------------------------------------------------------------------------------------------------------------------------------------------------------------------------------------------------------------------------------------------------------------------------------------------------------------------------------------------------------------------------------------------------------------------------------------------------------------------------------------------------------------------------------------------|
|                                       | <ul style="list-style-type: none"> <li>-return periods of severe winter storms in Europe</li> <li>-problems of over-optimistic insurance pricing based on most recent damage experience.</li> </ul>                                                                                                                                                                                                                                                                                                                                                                                                                                                                                                                                                                                                                                                                                                                                                                                                                                |
| BOMEL (2001)                          | <p>BOMEL Limited, Analysis of green water susceptibility of FPSO/FSUs on the UKCS, HSE Health and Safety Executive, Offshore Technology Report 2001/005, 38pp</p> <ul style="list-style-type: none"> <li>-background info on green water incidents at UK/Norway FPSOs 1995-2000</li> </ul>                                                                                                                                                                                                                                                                                                                                                                                                                                                                                                                                                                                                                                                                                                                                         |
| Magnusson and Donelan (2001)          | <p>Magnusson AK and MA Donelan, Extremes from evolved waves using measurements from a waverider buoy and vertical lasers, M Olagnon, GA Athanasoulis (ed), (2001) Rogue waves 2000: Proceedings of a Workshop in Brest, France, 29-30 November 2000. Actes de Colloues - IFREMER, 32. Editions IFREMER: Plouzane, ISBN 2-84433-063-0.X, 395pp, pp.141-150, 2001.</p> <ul style="list-style-type: none"> <li>-bad storm on Ekofisk field 12Dec1990 causing alot of damage to platforms</li> <li>-Ekofisk infrastructure subsiding due to oil extraction</li> <li>-Ekofisk Extreme Wave Warning introduced as mitigation measure of storm effects on subsiding platforms</li> <li>-case study of 4 storms: 25Oct1998, 27Oct1998, 4-5Feb1999, 17Feb1999.</li> <li>-DNMI efforts to forecast extreme crest heights in addition to significant wave height.</li> </ul>                                                                                                                                                                  |
| Schmidt (2001)                        | <p>Schmidt H, Die Entwicklung der Sturmhaufigkeit in der Deutschen Bucht zwischen 1878 und 2000. Klimastatusbericht 2001, DWD. pp199-205.</p> <ul style="list-style-type: none"> <li>-geostrophic wind calculation from triangles of stations in the German Bight</li> <li>-mercury barometer readings more homogeneous than wind speed measurements</li> <li>-long trend of increasing wind speeds broken by low geostrophic wind speeds starting in 1996</li> <li>-periods of increasing wind speeds 1880-1910 and 1930-1960</li> </ul>                                                                                                                                                                                                                                                                                                                                                                                                                                                                                          |
| Faulkner (2002)                       | <p>Faulkner, D., Shipping safety. A matter of concern, Ingenia, Royal Academy of Engineering, London (August/September), 13, 13-20, 2002</p> <ul style="list-style-type: none"> <li>*-1991 peak loss bulk carriers over 10ktons; 22 ships &amp; 200 people</li> <li>-main causes bulk carrier loss over 2 decades: 60% operational &amp; 40% water ingress</li> <li>*-attributable ship loss: 30% bad weather, 25% unexplained</li> <li>*-ships not designed to survive extreme weather</li> <li>*-Oct1998: N Pacific storms sweep 700 containers from the 4 large containers ships</li> <li>* -first European Parliamentary Symposium on Marine Safety, 24Jan2002 (new procedures)</li> <li>-max pressure hatch covers; increase strength 2-3.5</li> <li>* -ship rules order of magnitude inadequate</li> <li>-Maxwave projec run from Dec 1999 for 3 years; 4.65 million Euros, 6 partner countries</li> <li>-Faulkner &amp; Maxwave leaders to meet with the IMO Oct 2002 to emphasize Maxwave &amp; survival design</li> </ul> |
| HSE (2002b)                           | <p>HSE Health and Safety Executive, Floating Installations, Offshore Technology Report 2001/048, 2002</p> <ul style="list-style-type: none"> <li>-HSE's Offshore installations: Guidance on Design, Construction and Certification (1990 plus amendments)</li> <li>-guidance originally published in support of certification regime un SI289</li> <li>Offshore installations regulations 1974</li> <li>-SI289 revoked by Offshore Installations Regulations 1974</li> <li>-Guidance was formally withdrawn entirely 30June1998</li> <li>-'the withdrawal of the Guidance was not a reflection of the soundness (or otherwise) of the technical information it contained'</li> </ul>                                                                                                                                                                                                                                                                                                                                               |
| Buchner (2003)                        | <p>Buchner, Bas, Floaters challenged by waves, Offshore, 01Jun2003, <a href="https://www.offshore-mag.com/rigs-vessels/article/16755452/floaters-challenged-by-waves">https://www.offshore-mag.com/rigs-vessels/article/16755452/floaters-challenged-by-waves</a></p>                                                                                                                                                                                                                                                                                                                                                                                                                                                                                                                                                                                                                                                                                                                                                              |
| Jung et al. (2003)                    | <p>Jung T, E Klinker, S Uppala, 10. Reanalysis and reforecast of three major European storms of the 20th century using the ECMWF forecasting system. ERA-40 Project Report Series, 33pp, November, 2003.</p> <ul style="list-style-type: none"> <li>-ERA40 reanalysis project enables historic storm hindcasts for the first time at ECMWF</li> <li>-special data extraction from NCEP for the 1953 storm</li> <li>-ECMWF ensemble forecasts from the early 1990s grew from need to assess reliability and sensitivity of medium range weather forecasts.</li> <li>-previously forecast robustness assessed by comparing forecasts from different weather centers</li> </ul>                                                                                                                                                                                                                                                                                                                                                       |
| Toffoli et al (2003)                  | <p>Toffoli J.M., J.M. Lefevre, J. Montbaliu, H. Savina, E. Bitner-Gregersen, Freak waves: Clues for prediction in ship accidents? Proceedings of the Thirteenth (2003) International Offshore and Polar Engineering Conf. Honolulu, Hawaii, USA, May 25-30,2003, The International Society of Offshore and Polar Engineers</p> <ul style="list-style-type: none"> <li>-investigation of key met-ocean parameters for freak wave accidents from Lloyds ship accident database</li> <li>-no single met-ocean parameter good predictor of freak wave strikes</li> <li>-many freak wave ship accidents during low Hs</li> <li>-ECMWF ERA wave information pulled for accidents.</li> </ul>                                                                                                                                                                                                                                                                                                                                             |
| Bitner-Gregersen and Magnusson (2004) | <p>Bitner-Gregersen EM, AK Magnusson, Extreme events in field data and in a second order wave model, Proc. of the Rogue Waves 2004 workshop, Oct 20-22, 2004, Brest, France</p> <ul style="list-style-type: none"> <li>-Varg B greenwater incident on 30Nov1999; Ekofisk wave data analysis</li> </ul>                                                                                                                                                                                                                                                                                                                                                                                                                                                                                                                                                                                                                                                                                                                             |
| Sahin (2004)                          | <p>Sahin, AD, Progress and recent trends in wind energy, Progress in Energy and Combustion Science, 30, 501-543, 2004.</p> <ul style="list-style-type: none"> <li>-historical development of wind energy</li> <li>-motivated by energy crises, pollution reduction, greenhouse gas reduction.</li> </ul>                                                                                                                                                                                                                                                                                                                                                                                                                                                                                                                                                                                                                                                                                                                           |
| DEA (2005)                            | <p>DEA, Offshore Wind Power. Danish Experiences and Solutions. Danish Energy Authority, October, 2005. [pdf properties: datestamp: 24Oct2005]</p> <ul style="list-style-type: none"> <li>-1997 Denmark Action Plan</li> <li>-Denmark wind farm shut down during storm Gudrun 08Jan2005</li> <li>-Table of Denmark offshore wind farms with Horns Rev demonstration farm start 2002</li> <li>-14% of Denmark energy production by wind energy in 2004</li> <li>-wind energy construction 4% of total Denmark undustry production; 20000 people employed</li> <li>-Denmark turbines and ancillary infrastructure represents 40% of market share</li> <li>-map of Denmark energy grid</li> <li>-synergy with offshore oil industry</li> </ul>                                                                                                                                                                                                                                                                                         |
| Elsam (2005)                          | <p>Elsam, Horns Rev - daenisches Windkraftwerk in der Nordsee, Stahlbau, 451, 73, 2005, pdf datestamp:</p>                                                                                                                                                                                                                                                                                                                                                                                                                                                                                                                                                                                                                                                                                                                                                                                                                                                                                                                         |

|                                |                                                                                                                                                                                                                                                                                                                                                                                                                                                                                                                                                                                                                                                                                                                                          |
|--------------------------------|------------------------------------------------------------------------------------------------------------------------------------------------------------------------------------------------------------------------------------------------------------------------------------------------------------------------------------------------------------------------------------------------------------------------------------------------------------------------------------------------------------------------------------------------------------------------------------------------------------------------------------------------------------------------------------------------------------------------------------------|
|                                | 02Jun2005<br>-significant contribution to Danish goal to reduce CO2 emissions; 2% of Danish energy use                                                                                                                                                                                                                                                                                                                                                                                                                                                                                                                                                                                                                                   |
| Liu et al (2005)               | Liu WT, X Xie, H Hu, W Tang, Wind convergence observed by Quikscat, 2005<br>-Quikscat provides surface wind at 12.5km resolution<br>-surface wind convergence and rain bands in Hurricane Floyd Sep1999.                                                                                                                                                                                                                                                                                                                                                                                                                                                                                                                                 |
| Rosenthal (2005)               | Rosenthal, W., Results of the Maxwave project, in Mueller P and D Henderson (ed), 2005, Rogue Waves. Proc. 14th 'Aha Huliko' Hawaii, Winter workshop, Univ. Hawaii, Manoa, Honolulu: School of Ocean Earth Sci Technol, Spec Publ, 193 pp., <a href="http://www.soest.hawaii.edu/PubServices/AhaHuliko.html">http://www.soest.hawaii.edu/PubServices/AhaHuliko.html</a> .<br>-visual classification of 3 types of rogue waves: a.singular wave tower, b.three sisters, c.white wall<br>-case studies: Draupner (01/01/95), Stenfjell (26/10/98), Schiehallion (09/11/1998)<br>*-Accident Limit State: takes account of 10000 year wave<br>-critical Maxwave parameters: maximum crest, wave steepness, wave asymmetry, dir wave spectrum |
| Sterl and Caires (2005)        | Sterl, Andreas and Sofia Caires, Climatology, variability and extrema of ocean waves: The web-based KNMI/ERA-40 Wave Atlas, International Journal of Climatology, 25, 963-977, 2005.<br>-ERA40 model can not support tropical cyclones                                                                                                                                                                                                                                                                                                                                                                                                                                                                                                   |
| Williams (2005)                | Williams, M.O., Wave mapping in UK waters, Prepared by PhysE for the Health and Safety Executive 2005, Research Report 392<br>-updated atlas of 100y extreme Hs for North Sea and northeastern Atlantic Ocean<br>-special analysis for Magnus field in northern North Sea where NEXTRA model bias appeared                                                                                                                                                                                                                                                                                                                                                                                                                               |
| Bork et al (2007)              | Bork I, S Dick, E Kleine, S Mueller-Navarra, Tsunami - a study regarding the North Sea coast, Berichte des Bundesamtes fuer Seeschiffahrt und Hydrographie, Nr.41/2007, Hamburg and Rostock 2007<br>-high dissipation of the tsunami wave energy in North Sea model study<br>-5m line tsunami introduced at N North Sea give 50cm residual in German Bight<br>-area of wave focussing in the Wash behind the Dogger Bank<br>-area of wave focussing North Shields<br>-high amplitude secondary waves in southern North Sea<br>-coherence of initial tsunami wave lost in S North Sea except in constant depth model                                                                                                                      |
| Gorbachev et al (2008)         | Gorbachev A, JM Mattei, V Rebour, E Vial, Report on flooding of Le Blayais power plant on 27 december 1999, internet 2008<br>-outline of Le Blayais power plant incident in the Gironde during Storm Martin 27Dec1999                                                                                                                                                                                                                                                                                                                                                                                                                                                                                                                    |
| Krogstad et al (2008)          | Krogstad, HE., S.F. Barstow, J.P. Mathisen, L. Lonseth, A.K. Magnusson, M.A. Donelan, Extreme waves in the long-term wave measurements at Ekofisk, in Proc. Rogue Waves 2008 Workshop, ed. by M Olagnon and M. Prevosto, 13-15Oct2008, Brest France, 23-33, 2008<br>-Ekofisk Reference Data Set from 1980                                                                                                                                                                                                                                                                                                                                                                                                                                |
| Wagenaar and Eecen (2009)      | Wagenaar JW, PJ Eecen, Measurements of wind, wave and currents, OWEZ_R_122_Wave_20050701_200812131, ECN-E--09-015, December 2009<br>-Netherlands OWEZ wind farm project starts met-ocean monitoring from summer 2005<br>-subsidy of Ministry of Economic Affairs under CO2 reduction scheme Netherlands                                                                                                                                                                                                                                                                                                                                                                                                                                  |
| Bilgili et al (2011)           | Bilgili M, A. Yasar, E. Simsek, Offshore wind power development in Europe and its comparison with onshore counterpart, Renewable and Sustainable Energy Reviews, 15, 905-915, 2011<br>-history and development of onshore/offshore wind energy<br>-pollution reduction, first commercial wind farms California 1980s,<br>-first floating wind turbine Nordersund Sweden 1990,<br>-UK exceeds Denmark installed offshore wind capacity 2008.                                                                                                                                                                                                                                                                                              |
| Rosenthal et al (2011)         | Rosenthal W, AL Pleskachevsky, S Lehner, S Brusch, Observation and modeling of high individual ocean waves and wave groups caused by a variable wind field, 12th International Workshop on Wave Hindcasting and Forecasting, Kohala Coast, Hawaii, HI, 2011.<br>-introduction of a new type of wave model to simulate resonant growth between gust field and moving waves.<br>-discussion that return period of extreme waves much shorter than originally thought from empirical model.                                                                                                                                                                                                                                                 |
| Foster (2013)                  | Foster R, Signature of large aspect ratio roll vortices in synthetic aperture radar images of tropical cyclones, Oceanography, 26, 58-67, 2013.<br>-Synthetic aperture radar SAR images to retrieve wind divergence and curl at 1km resolutions<br>-boundary layer rolls appear with space scales of 8-19km (about same resolution of as Quikscat)<br>-cloud streets may or may not form in association with boundary layer rolls.                                                                                                                                                                                                                                                                                                       |
| Fruergaard et al (2013)        | Fruergaard M, TJ Andersen, PN Johannessen, LH Nielsen, M Pejrup, Major coastal impact induced by a 1000-year storm event, Nature, Scientific Reports, 3:1051, DOI: 101038/srep01051, 2013.<br>-worst storm surge in Danish Waddensee 11-12Oct1634<br>-water level 6.1m from mark on Ribe Cathedral; 1 m higher than rank 2 surge                                                                                                                                                                                                                                                                                                                                                                                                         |
| Feser et al (2015)             | Feser F, M Barcikowska, O. Krueger, F. Schenk, R. Weiss, L. Xia, Review Article: Storminess over the North Atlantic and northwestern Europe - a review, QJR Meteorol. Soc, 141, 350-382, 2015.<br>-studies from mid-1980s-1990s showing increasing trend in sea state climate<br>-subsequently found to be part of interannual variability                                                                                                                                                                                                                                                                                                                                                                                               |
| Larsen et al (2015)            | Larsen XG, C Kalogeri, G Galanis, G Kallos, A statistical methodology for the estimation of extreme wave conditions for offshore renewable applications, Renewable Energy, 80, 205-218, 2015.<br>-50y return period for significant wave height at the Horns Rev site<br>-reference to missing peak problem in wave models (Cavaleri et al, 2009)                                                                                                                                                                                                                                                                                                                                                                                        |
| Larsen et al (2017)            | Larsen XG, J Du, R Bolanos, S Larsen, On the impact of wind on the development of wave field during storm Britta, Ocean Dynamics, 67, 1407-1427, 2017.<br>-Anatol 1999 and Xaver (2013) mentioned as serious storms outside of main investigation period 2005-2013<br>-purpose to introduce new high resolution atmosphere-wave model to simulate Britta                                                                                                                                                                                                                                                                                                                                                                                 |
| Ravnsdal and Abrahamsen (2017) | Ravnsdal, Oda Roaldsdotter and Trine Abrahamsen, The Norwegian tide gauge network: National report of Norway, Kartverket, June 2017.<br>-historical and present status of Norwegian tide gauge network                                                                                                                                                                                                                                                                                                                                                                                                                                                                                                                                   |
| Halsne et al (2020)            | Halsne M, N Oma, G Ersdal, A Kvitrud, RL Leonhardsen, M Langoy, T Andersen, LG Bjrheim, In service                                                                                                                                                                                                                                                                                                                                                                                                                                                                                                                                                                                                                                       |



|                       |                                                                                                                                                                                                                                                                                                                                                     |
|-----------------------|-----------------------------------------------------------------------------------------------------------------------------------------------------------------------------------------------------------------------------------------------------------------------------------------------------------------------------------------------------|
|                       | experiences with ship-shaped floating production units, Proceedings of the ASMI 2020 39th International Conference on Ocean, Offshore and Arctic Engineering, OMAE 2020, June 28-July 3, 2020, Fort Lauderdale, FL, USA, OMAE2020-19287<br>-North Sea FPSO green water incidents restart 2016 for first time since 2001<br>-fatigue cracks in FPSOs |
| Surgewatch (20201013) | Surgewatch, Storm event 28th November 1999, <a href="https://www.surgewatch.org/events/1999_11_28/">https://www.surgewatch.org/events/1999_11_28/</a> , accessed 13Oct2020<br>-surge and overtopping in Solent area 28Nov1999                                                                                                                       |

Table SL71. Errors/types in source reports for storm (arranged by year and then alphabetically)

| Source                  | Full Reference and Notes                                                                                                                                                                                                                                                                                                                                                                                                                                                                                                                                 |
|-------------------------|----------------------------------------------------------------------------------------------------------------------------------------------------------------------------------------------------------------------------------------------------------------------------------------------------------------------------------------------------------------------------------------------------------------------------------------------------------------------------------------------------------------------------------------------------------|
| Woetmann Nielsen (2000) | Woetmann Nielsen, AN, DMI-HIRLAM's forudsigelse af orkanen den 3.december 1999. Vejret, 82, pp. 19-23, februar 2000.<br>-caution when reading sea level pressures printed on synoptic chart in FIG2; they are 400mb too low or else presented in an abbreviated format: $P_{map}=(P_{meas}-900.0)*10.0$                                                                                                                                                                                                                                                  |
| Decker (2018)           | Decker, Lauge, Windthrow risk assessment of Douglas-fir stands in Denmark. A comparison study of Douglas-fir ( <i>Pseudotsuga menziesii</i> ) and Norway spruce ( <i>Picea abies</i> ), M.Sc. thesis, University of Copenhagen, submitted 6Aug2018 [pdf properties: title=Notatbog; author=Lauge Decker, Subject=SKOG303 - Silviculture and forest growth yield]<br>-FIG6.2.[MAP] Maximum wind speed (gusts) during storm Anatol on 3Dec1999.<br>Orange marks forests experiencing wind throw.<br>Red dotted line is trajectory. ERROR IN TRAJECTORY MAP |

Table SL72. Abbreviations used in manuscript (arranged by year and then alphabetically)

| Abbreviation | Full name                                              |
|--------------|--------------------------------------------------------|
| DMI          | Danmarks Meteorologiske Institut                       |
| DWD          | Deutscher Wetterdienst                                 |
| ECMWF        | European Centre for Medium Range Weather Forecasts     |
| FINO1        | Forschungsplattformen in Nord- und Ostsee Nr. 1        |
| GESLA        | Global Extreme Sea Level Analysis                      |
| HSE          | Health and Safety Executive                            |
| IEA          | International Energy Agency                            |
| IPCC         | Intergovernmental Panel on Climate Change              |
| KNRM         | Koninklijke Nederlandse Redding Maatschappij           |
| RMS          | Risk Management Models, Analytics, Software & Services |
| RWS          | Rijkswaterstaat                                        |
| UKMO         | UK Met Office                                          |
| UN/ECE       | United Nations Economic Commission for Europe          |
| UTC          | Coordinated Universal Time                             |
| WASA Group   | Waves and Storms in the North Atlantic                 |
| XWS          | Extreme Wind Storms                                    |

Table SL73. People contacted for information about storm (arranged by year and then alphabetically)

| Name                    | Affiliation                                                                        |
|-------------------------|------------------------------------------------------------------------------------|
| Berz, Gerhard           | Munich Re (retired)                                                                |
| Beswick, Mark           | UK Met Office National Meteorological Archive                                      |
| Bluemel, Maria          | Landesbetrieb fuer Kuestenschutz, Nationalpark, und Meereschutz Schleswig-Holstein |
| Ersdal, Gerhard         | Petroleum Tilsynet (PTIL)                                                          |
| Frederiksen, Bjørn      | Kystdirektoratet                                                                   |
| Granneman, Edwin        | Kustwacht                                                                          |
| Hinrichsen, Arfst       | Landesbetrieb fuer Kuestenschutz, Nationalpark, und Meereschutz Schleswig-Holstein |
| Machoczek, Pamela       | Bundesamt für Seeschifffahrt und Hydrographie (BSH) library                        |
| Mueller, Larissa        | Bundesamt für Seeschifffahrt und Hydrographie (BSH)                                |
| Nielsen, Bárður         | University of the Faroe Islands                                                    |
| Reemts, Antke           | Seenotretter                                                                       |
| Ross, Catherine         | UK Met Office National Meteorological Archive                                      |
| Skaland, Reidun Gangsto | Met.no                                                                             |
| Tainamo, Susanne        | Swedish Meteorological and Hydrological Institute (SMHI)                           |
| Van Vliet, Gerda        | Koninklijke Nederlandse Redding Maatschappij (KNRM)                                |
| Wiechmann, Wilfried     | Bundesanstalt für Gewässerkunde (BAFG)                                             |
| Zijderfeld, Annette     | Rijkswaterstaat (RWS)                                                              |

## References

- Aakjaer AF, Orkanen i Nordsoen den 30. oktober 2000, Vejret, 85, 1-7, 2000  
 Air Worldwide, Three severe storms together were a wake-up call, 19Dec2019.  
 Alexandersson H, T Schmith, K Iden, H Tuomenvirta, Long-term variations of the storm climate over NW Europe, The Global Atmosphere and Ocean System, 6, 97-120, 1998  
 AON Benfield, Historie von 1703 bis 2012: Winterstuerme in Europa, Stand: Januar 2013  
 Astleitner, Thomas, 3. December 1999: Orkantief Anatol fegt ueber de Nordsee, <https://uwr.de/de/a/3-dezember-1999-orkan-tief-anatol-trifft-deutschland>, published 3Dec2019, accessed 20Sep2020

Bancroft, George P., Marine Weather Review - North Atlantic Area September through December 1999, Mariners Weather Log, Vol.44, No.1, April 2000. pp.23-38.

Bell GD, MS Halpert, RS Schnell, RW Higgins, J Lawrimore, VE Kousky, R Tinker, W Thlaw, M Chelliah, A Arthusa, Climate Assessment for 1999, Bulletin of the American Meteorological Society, 81, S1-S50, 2000

Beredskapsstyrelsen Udviklingsenheden, Den Samlede redningsberedskabssektors opgaveløsning i forbindelse med orkanen d. 3.-4. december og stormen d. 17 december 1999 - En Tvaergaende evaluering og erfaringsopsamling. Februar 2000, Beredskabsstyrelsen, Beredskabsudviklingsenheden, Datavej 16, 3460 Birkerød, Telefon: 4590 6000, Telefax: 4590 6060, E-mail: bue@brs.dk, Internet: www.brs.dk

Bilgili M, A. Yasar, E. Simsek, Offshore wind power development in Europe and its comparison with onshore counterpart, Renewable and Sustainable Energy Reviews, 15, 905-915, 2011

Bitner-Gregersen EM, AK Magnusson, Extreme events in field data and in a second order wave model, Proc. of the Rogue Waves 2004 workshop, Oct 20-22, 2004, Brest, France

BOMEL Limited, Analysis of green water susceptibility of FPSO/FSUs on the UKCS, HSE Health and Safety Executive, Offshore Technology Report 2001/005, 38pp

Bork I, S Dick, E Kleine, S Mueller-Navarra, Tsunami - a study regarding the North Sea coast, Berichte des Bundesamtes fuer Seeschiffahrt und Hydrographie, Nr.41/2007, Hamburg and Rostock 2007

Bresch DN, M Bisping, G Lemcke, Storm over Europe. An underestimated risk, Swiss Re (Swiss Reinsurance Company), 27pp, 2000.

Brugge, Roger, Weather Diary, Dec 1999 [www.met.reading.ac.uk/~brugge/diary1999.html#1299](http://www.met.reading.ac.uk/~brugge/diary1999.html#1299)

Buchana P, PR McSharry, Windstorm risk assessment for offshore wind farms in the North Sea, Wind Energy, 22, 1219-1229, 2019

Buchner, Bas, Floaters challenged by waves, Offshore, 01Jun2003, <https://www.offshore-mag.com/rigs-vessels/article/16755452/floaters-challenged-by-waves>

Buizza, Roberto and Anthony Hollingsworth, Severe weather prediction using the ECMWF EPS - The European Storms of December 1999, ECMWF Newsletter, No. 89, Winter 2000/01.

Buizza, Roberto and Anthony Hollingsworth, Storm prediction over Europe using the ECMWF ensemble prediction system, Meteorol. Appl., 9, 2002

Caithness Windfarm, craigr, Detailed accidents to 19 June 2018. Document time stamp 30/07/2018, 177pp Wind turbine accident compilation (start 30Nov1980) [Storm Anatol 1999 reports]

Cappelen, J., Storm og ekstrem vind i Danmark - opgørelser og analyser til og med 2017, DMI rapport 18-07, Copenhagen 2018

Cappelen J, S Olufsen, MH Ribergaard, JW Nielsen, T Schmith, N Hansen, Det traekker op til orkan, updated 25Jun2018a, <https://www.dmi.dk/vejr-og-atmosfare/temaforside-decemberorkanen-1999/det-traekker-op-til-orkan/>

Cappelen J, S Olufsen, MH Ribergaard, JW Nielsen, T Schmith, N Hansen, Stormfloden under decemberorkanen, updated 25Jun2018b, <https://www.dmi.dk/vejr-og-atmosfare/temaforside-decemberorkanen-1999/stormfloden-under-decemberorkanen/>

Cappelen J, S Olufsen, MH Ribergaard, JW Nielsen, T Schmith, N Hansen, Var klimaændringer skyld i decemberorkan? updated 25Jun2018c, <https://www.dmi.dk/vejr-og-atmosfare/temaforside-decemberorkanen-1999/var-klimaændringer-skyld-i-decemberorkanen/>

Cappelen J, S Olufsen, MH Ribergaard, JW Nielsen, T Schmith, H Hansen, Dagen derpaa, updated 25Jun2018d, <https://www.dmi.dk/vejr-og-atmosfare/temaforside-decemberorkanen-1999/dagen-derpaa/>

Cappelen J, S Olufsen, MH Ribergaard, JW Nielsen, T Schmith, N Hansen, Orkan passerer, updated 25Jun2018e, <https://www.dmi.dk/vejr-og-atmosfare/temaforside-decemberorkanen-1999/orkanen-passerer/>

Cappelen J, S Olufsen, MH Ribergaard, JW Nielsen, T Schmith, N Hansen, Bringer fremtiden flere decemberorkaner? 25Jun2018f, <https://www.dmi.dk/vejr-og-atmosfare/temaforside-decemberorkanen-1999/bringer-fremtiden-flere-decemberorkaner/>

Cappelen J, S Olufsen, MH Ribergaard, JW Nielsen, T Schmith, N Hansen, Bringer fremtiden flere decemberorkaner? 25Jun2018f, <https://www.dmi.dk/vejr-og-atmosfare/temaforside-decemberorkanen-1999/bringer-fremtiden-flere-decemberorkaner/>

Cappelen, John, Orkaner paa vore breddegrader, updated 8Jan2019 <https://www.dmi.dk/vejr-og-atmosfare/temaforside-vind/orkaner-paa-vore-breddegrader/>, (webpage downloaded 12Oct2020)

Carter DJT and L Draper, Has the north-east Atlantic become rougher? Nature, 332, p.494. 1988.

Danhostel-Ribe, Sturmfluten, <https://web.archive.org/web/20131215125955/http://www.danhostel-ribe.dk/de/sturmfluten>, accessed 25Apr2021

DEA, Offshore Wind Power. Danish Experiences and Solutions. Danish Energy Authority, October, 2005. [pdf properties: datestamp: 24Oct2005]

DEA, Security of Electricity Supply in Denmark, 1st edition 2015, translated 2016, Danish Energy Agency, Amaliegade 44, 1256 Copenhagen K, ISBN 978-87-93180-15-4

Decker, Lauge, Windthrow risk assessment of Douglas-fir stands in Denmark. A comparison study of Douglas-fir (*Pseudotsuga menziesii*) and Norway spruce (*Picea abies*), M.Sc. thesis, University of Copenhagen, submitted 6Aug2018 [pdf properties: title=Notatbog; author=Lauge Decker, Subject=SKOG303 - Silviculture and forest growth yield]

Della-Marta PM, H Mathis, C Frei, MA Liniger, J Kleinn, C Appenzeller, The return period of wind storms over Europe, International Journal of Climatology, 29, 437-459, 2009.

DGZRS, "Fischkutter brennt" Eiswette bringt die "Jente" und drei Mann in Sicherheit, Jahrbuch 2000, Deutsche Gesellschaft zur Rettung Schiffbruechiger, Hamburg, pp6-7, 2000.

Ditlevsen C, MM Ramos, C Sorensen, UR Ciocan, T Pionkowitz, Hojvandsstatistikker 2017, Miljo- og Foedevareministeriet, Kystdirektoratet Lemvig, Februar, 2018

DMI, Rapport. Orkanen over Danmark den 3.-4. december 1999, Danmarks Meteorologiske Institut, Lyngbyvej 100, DK-2100 Kobenhavn 0, 9Dec1999.

DWD, Orkantief 'Anatol' von 3./4. Dezember 1999 (5pp), [https://www.dwd.de/DE/leistungen/besondereereignisse/stuerme/19991204\\_orkantief\\_anatol.pdf](https://www.dwd.de/DE/leistungen/besondereereignisse/stuerme/19991204_orkantief_anatol.pdf) [pdf document properties: datestamp: 28May2002]

DWD, Klimatologische Bewertung der juensten Stark-Windereignisse (Anatol und Lothar) aus der Sicht der Klimatologie der freien Atmosphaere, [pdf document properties: 28/05/2002]

Elsam, Horns Rev - daemisches Windkraftwerk in der Nordsee, Stahlbau, 451, 73, 2005, pdf datestamp: 02Jun2005

Environment Agency, Thames Barrier Project Pack 2012, time stamp Nov. 24, 2011

Environment Agency, Thames Barrier Project Pack, January, 2018

Ersdal G and A Kvitrud, Green water on Norwegian production ships, Proceedings of the tenth (2000) International Offshore and Polar Engineering Conference, Seattle, USA, May 28- June 2, 2000, The International Society of Offshore and Polar Engineers, 2000

Faulkner, D., Shipping safety. A matter of concern, Ingenia, Royal Academy of Engineering, London (August/September), 13, 13-20, 2002

Fehrmann, A. and A. Fackler, Offshore wind farms: risk and initial loss experience, Temple Insurance, a member of the Munich Re Group, 2010 [PDF timestamp: 09Mar2010] (last date reference 2001; last incident reference 2003)

Feser F, M Barcikowska, O. Krueger, F. Schenk, R. Weiss, L. Xia, Review Article: Storminess over the North Atlantic and northwestern Europe - a review, *QJR Meteorol. Soc.*, 141, 350-382, 2015.

Fink AH, T Brucher, V Erment, A Kruger, JG Pinto, The European storm Kyrill in Jan 2007: synoptic evolution, meteorological impacts and some considerations with respect to climate change, *Natural Hazards and Earth System Sciences*, 9, 405-423, 2009.

Focus, Strandfresser Anatol, Nr.50, 1999 (correspondent Birte Siedenburger), [https://www.focus.de/politik/deutschland/sylt-strandfresser-anatol\\_aid\\_178994.html](https://www.focus.de/politik/deutschland/sylt-strandfresser-anatol_aid_178994.html)

Forestry Commission, Naar skoven blaeser omkuld, *Vejret*, 85, pp.8-9, Dec, 2000

Foster R, Signature of large aspect ratio roll vorticies in synthetic aperture radar images of tropical cyclones, *Oceanography*, 26, 58-67, 2013.

Frank, H, and D Majewski, Hindcasts of historic storms with the DWD models GME, LMQ and LMK using ERA-40 reanalysis, ECMWF Newsletter No. 109, autumn 2006, pp.16-21.

Fruergaard M, TJ Andersen, PN Johannessen, LH Nielsen, M Pejrup, Major coastal impact induced by a 1000-year storm event, *Nature, Scientific Reports*, 3:1051, DOI: 101038/srep01051, 2013.

Gardiner, Barry, Appendix 3: Background information on 11 storms selected for detailed analysis, European Forest Institute, Atlantic European Regional Office - EFIAtlantic, 161 pp. [PDF properties: datestamp 23Jul2010]

Gardiner B, K Blennow, J-M Carnus, P Fleischer, F Ingemarson, G Landmann, M Lindner, M Marzano, B Nicoll, C Orazio, J-L Peyron, M-P Reviron, M-J Schelhaas, A Schuck, M Spielmann, T Usbeck, Destructive storm in European Forests: Past and Forthcoming Impacts, European Forest Institute, Atlantic European Regional Office - EFIAtlantic [pdf document properties: author=Barry Gardiner, datestamp=09Mar2012]

Gatey, DA, The analysis of extreme synoptic winds, Ph.D. Thesis, University of Western Ontario, 2011. University of Western Ontario - Electronic Thesis and Dissertation Repository. Paper 268.

Ge J, D Much, J Kappenberg, O Nino, P Ding, Z Chen, Simulating storm flooding maps over Hafencity under present and sea level rise scenarios, *Journal of Flood Risk Management*, 7, 319-331, 2014.

Goennert, Gabriele and Thomas Buss, Sturmfluten zur Bemessung von Hochwasserschutzanlagen, *Berichte des Landesbetriebes Strassen, Bruecken und Gewaesser Nr.2/2009*, Freie und Hansestadt Hamburg, Landesbetrieb Strassen, Bruecken und Gewaesser, Hamburg ISSN 1867-7959.

Gorbachev A, JM Mattei, V Rebour, E Vial, Report on flooding of Le Blayais power plant on 27 december 1999, internet 2008

Gram-Jensen, Ib, Stormfloder, Danish Meteorological Institute, Scientific Report 91-1, Copenhagen, 1991

Haeseler S, C Lefebvre, Heavy storm Christian on 28 October 2013, DWD, 13Nov2013

Halsne M, N Oma, G Ersdal, A Kvitrud, RL Leonhardsen, M Langoy, T Andersen, LG Bjorheim, In service experiences with ship-shaped floating production units, Proceedings of the ASMI 2020 39th International Conference on Ocean, Offshore and Arctic Engineering, OMAE 2020, June 28-July 3, 2020, Fort Lauderdale, FL, USA, OMAE2020-19287

Herrling, Gerald, Heiko Knaack, Ralf Kaiser, Hanz D. Niemayer, Evaluation of design water levels at the Ems-Dollard estuary considering the effect of a storm surge barrier, 32nd Conference on Coastal Engineering 2010, Shanghai, China, 30Jun-05Jul2020. ed by JM Smith and P Lynett, pp. 3899-3917, [pdf document properties: title=ICCE2020\_Ems\_final, datestamp=15Sep2010]

Hjorteland K, MJ Mes, AK Magnusson, Ekofisk Observed Weather Compared with Weather Predictions, Offshore Technology Conference, 3-6May, Houston, Texas, 1999, OTC-10768-MS

Hogben, N, Increases in wave heights over the North Atlantic: A review of the evidence and some implications for the naval architect, *Transactions of The Royal Institution of Naval Architects*, W5, 93-101, 1994.

HSE Health and Safety Executive, Floating Installations, Offshore Technology Report 2001/048, 2002

HSE, An investigation of storm incidents in UK waters, Prepared by the Met Office for the Health and Safety Executive, Offshore Technology Report 2001/078, 2002c.

Humbling David, Weatherwatch: Our severe gales are not hurricanes, but they can be as deadly, *The Guardian*, 13Dec2013

IEA, Wind Energy Annual Report 2000, International Energy Agency, National Renewable Energy Laboratory, May, 2001. (Author Ian Fletcher) pdf document properties: datestamp: 08Jul2005;

Jensen J, C Mudersbach, SH Mueller-Navarra, I Bork, C Kozziar, V Renner, Modellgestuetzte Untersuchungen zu Sturmfluten mit sehr geringen Eintrittswahrscheinlichkeiten an der deutschen Nordseekueste, *Die Kueste*, 71, 123-167, 2006.

Jensen J, SH Mueller-Navarra, Storm surges on the German coast, *Die Kueste*, 74 ICCE (2008), 92-124.

Joyner, T.A., Optimizing peak gust and maximum sustained wind speed estimates from mid-latitude wave cyclones, Louisiana State University Doctoral Dissertations, 421, 2013

Jung T, E Klinker, S Uppala, 10. Reanalysis and reforecast of three major European storms of the 20th century using the ECMWF forecasting system, ERA-40 Project Report Series, 33pp, November, 2003.

Keers, JF, The meteorological conditions leading to storm surges in the North Sea, *Meteorological Magazine*, London, 95, (1130), 261-272, Sept. 1966

Kristandt, J, B Brecht, H Frank, H Knaack, Optimization of empirical storm surge forecast – modelling of high resolution wind fields, *Die Kuste*, 18, 301-308, 2014

Kristeligt Dagblad, Orkan haergede landet over. Paa vestkysten naede vindstyrken op pa 47 sekundmeter, 4Dec1999 00:00

Kristensen L, O Rathmann, SO Hansen, Extreme wind in Denmark, *Journal of Wind Engineering and Industrial Aerodynamics*, 87, 147-166, 2000.

Krogstad, HE., S.F. Barstow, J.P. Mathisen, L. Lonseth, A.K. Magnusson, M.A. Donelan, Extreme waves in the long-term wave measurements at Ekofisk, in *Proc. Rogue Waves 2008 Workshop*, ed. by M Olagnon and M. Prevosto, 13-15Oct2008, Brest France, 23-33, 2008

Land Schleswig-Holstein, Sturmflutereignis am 03.12.1999 (Wasserstaende an Pegelmessstellen), Amt fuer laendliche Raeume, Husum, Az.: 5621, document sent by Maria Bluemel 09Sep2020

Larsen XG, C Kalogeris, G Galanis, G Kallos, A statistical methodology for the estimation of extreme wave conditions for offshore renewable applications, *Renewable Energy*, 80, 205-218, 2015.

Larsen XG, J Du, R Bolanos, S Larsen, On the impact of wind on the development of wave field during storm Britta, *Ocean Dynamics*, 67, 1407-1427, 2017.

Lemcke G and F Schibli, Storm over Europe - an underestimated risk, 10Oct2000CET press release. [pdf document properties: 19Jul2007]

Leonhardsen RL, G Ersdal, A Kvitrud, Experience and risk assessment of FPSOs in use on the Norwegian Continental Shelf. Description of Events, The Eleventh International Offshore and Polar Engineering Conference, International Society of Offshore and Polar Engineerings, 2001. 6pp. Paper No. 2001-IL-05 [pdf document datastamp=08Apr2001]

Liu WT, X Xie, H Hu, W Tang, Wind convergence observed by Quikscat, 2005

Lloyd's Casualty Week, vol.318, No.11, Dec10, 1999

Lloyd's Casualty Week, vol318, No12, 17Dec1999

Logue JJ, The estimation of extreme wind speeds over standard terrain in Ireland, Technical Note No. 51, Meteorological Service, Dublin, May 1989

Magnusson AK and MA Donelan, Extremes from evolved waves using measurements from a waverider buoy and vertical lasers, M Olagnon, GA Athanasoulis (ed), (2001) Rogue waves 2000: Proceedings of a Workshop in Brest, France, 29-30 November 2000. Actes de Colloques - IFREMER, 32. Editions IFREMER: Plouzane, ISBN 2-84433-063-0.X, 395pp, pp.141-150, 2001.

Mann AJ, SO Hansen, En storm gor ingen norm, *Vejret*, no1. 22.Argang, 82, pp.28-34, Februar 2000.

Met Eireann, Monthly Weather Bulletin, no. 164, Dec, 1999

Mueller-Navarra, Sylvin, Sturmfluten. Land under an Nord- und Ostsee, in: Entfesselte Elemente-Der Mensch und die Kraefte der Natur, 5, 92-99, Guetersloh. Wissen-Media-Verl., 2005

Mueller-Navarra SH, W Lang, S Dick, KC Soetje, Ueber de Verfahren der Wasserstands- und Sturmflutvorhersage. Hydrodynamisch-numerische Modelle der Nord- und Ostsee und ein empirisch-statistisches Verfahren fuer die Deutsche Bucht, *promet. Jahrg. 29, Nr 1-4*, 117-124, June 2003

Gerhard Mueller-Westermeier, Beschreibung un klimatologische Bewertung des Orkantiefs "Kyrill", pdf properties: Title: Deutscher Wetterdienst - Nationale Klimauberwachung, Author: Gerhard Mueller-Westermeier, Subjet: Orkan Kyrill, datestamp: 26Jan2007

Munich Re, Winter Storms in Europe (II), Analysis of 1999 losses and loss potentials, Muenchener Rueck, Munich Re Group, 76pp, 2002

Neckelmann, S. and J. Petersen, Evaluation of the stand-alone wind and wave measurement systems for Horns Rev 150MW offshore wind farm in Denmark, OWEMES 2000, ATENA, Rome, Sicily, pp.17-27, 2000

Neu HJA, Interannual variations and longer-term changes in sea state of the North Atlantic from 1970 to 1982, *JGR*, 89, 6397-6402, 1984.

Nielsen, Jacob Woge and Nielsen, Mads Hvid, Stormfloden foraarsaget af orkanen den 3. december 1999, *Vejret*, 82, 8-14, Februar 2000

Nilsson C, I Stjernquist, L Barring, P Schlyter, AM Jonsson, H Samuelsson, Recorded storm damage in Swedish forests 1901-2000, *Forest Ecology and Management* 1999, 163-173, 2004

Nilsson C, S Goyette, L Barring, Relating forest damage data to the wind field from high-resolution RCM simulations: case study of Anatol striking Sweden in December 1999, *Global and Planetary Change*, 57, 161-176, 2007.

Pelt, S., Kraftige storme med oprindelse i Nordatlanten, *Vejret*, 137, 44-47, 2013

Norwegian Petroleum Directorate, Offshore Norway 1999, Norwegian Petroleum Directorate, Prof. Olav Hanssens vei 10, P.O. Box 600, 4003 Stavanger, Norway [pdf document properties: datestamp: 24Jan2019]

Ravndal, Oda Roaldsdotter and Trine Abrahamsen, The Norwegian tide gauge network: National report of Norway, Kartverket, June 2017.

RMS, 2013-2014 Winter Storms in Europe. An Insurance and Catastrophe Modeling Perspective. RMS White Paper. [PDF TIMESTAMP 11Mar2014]

Roberts JF, AJ Champion, LC Dawkins, KI Hodes, LC Shaffrey, DB Stephenson, MA Stringer, HE Thornton, DB Youngman, The XWS open access catalogue of extreme European windstorms from 1979 to 2012, *Nat. Hazards Earth Syst. Sci.* 14, 2487-2501, 2014

Rosenorn, Af Stig, De kraftigste storme i det tyvende aarhundrede in Denmark, *Vejret*, 82, 15-18, Februar 2000

Rosenorn, Af Stig, Efteraarsvejret 1999, *Vejret*, 82, No1., 22 Aargang, pp. 24-27, Februar, 2000.

Rosenthal, W., Results of the Maxwave project, in Mueller P and D Henderson (ed), 2005, *Rogue Waves. Proc. 14th 'Aha Huliko' Hawaii, Winter workshop*, Univ. Hawaii, Manoa, Honolulu: School of Ocaen Earth Sci Technoll, Spec Publ, 193 pp., <http://www.soest.hawaii.edu/PubServices/AhaHulikoa.html>.

Rosenthal W, AL Pleskachevsky, S Lehner, S Bruschi, Observation and modeling of high individual ocean waves and wave groups caused by a variable wind field, 12th International Workshop on Wave Hindcasting and Forecasting, Kohala Coast, Hawaii, HI, 2011.

Rossiter JR, Storm surges in the North Sea, 11 to 30 December 1954, *Philosophical Transactions of the Royal Society of London, Series A*, 251, No. 991, 139-160, 1958.

RWS, Verslag van de Stormvloed can 3 en 4 december 1999 (SR79), Ministerie van VerKeer en Waterstaat, Directoraat-Generaal Rijkswaterstaat, Rijksinstituut voor Kust en Zee, Stormvloedwaarschuwingsdienst, Postbus 20907, 2500EX 's-Gravenhage, 's-Gravenhage, december 1999.

Sahin, AD, Progress and recent trends in wind energy, *Progress in Energy and Combustion Science*, 30, 501-543, 2004.

Schmidt H and H von Storch, German Bight storms analyzed, *Nature*, 343,791, 1993

Schmidt H, Die Entwicklung der Sturmhaufigkeit in der Deutschen Bucht zwischen 1878 und 2000. *Klimastatusbericht 2001*, DWD. pp199-205.

Schmith T, E Kaas, TS Li, Northeast Atlantic winter storminess 1875-1995 re-analyzed, *Climate Dynamics*, 14, 529-536, 1998.

Schroevers M, J Dekker, R Groenendaal, H Peters, Inventory wave data for model calibration, Rijksinstituut voor Kust en Zee, Rijkswaterstaat, July, 2007 [pdf timestamp 07Jan2016]

Schwierz C, P Koellnet-Heck, E Zenklusen Mutter, DN Bresch, P-L Vidale, M Wild, C Schaer, Modelling European winter wind storm losses in current and future climate, *Climatic Change*, 101, 485-514, 2010.

Sieber, Jeanette, Impacts of extreme hydro-meteorological events on electricity generation and possible adaptation measures. A GIS-based approach for corporate risk management and enhanced climate mitigation concepts in Germany. Ph.D. thesis, Julius-Maximilians-Universitaet Wuerzburg - Institut fuer Geographie, Karlsruhe, November 2012

SMHI\_20111013, Hosten 1999 - Arhundradets storm? 13Oct2011 (<https://www.smhi.se/kunskapsbanken/meteorologi/hosten-1999-arhundradets-storm-1.5762>)

Sommer A, Wind Resources at Horns Rev, Eltra PSO-2000 Proj nr. EG-05 3248, Tech-wise, 2002.

Sommer, A., Offshore measurements of wind and waves at Horns Rev & Laeso, Denmark. European Seminar OWEMES 2003, Apr 10-12, 2003, Naples, Campania, Italy.

Sterl, Andreas and Sofia Caires, Climatology, variability and extrema of ocean waves: The web-based KNMI/ERA-40 Wave Atlas, *International Journal of Climatology*, 25, 963-977, 2005.

Surgewatch, Storm event 28th November 1999, [https://www.surgewatch.org/events/1999\\_11\\_28/](https://www.surgewatch.org/events/1999_11_28/), accessed 13Oct2020

Tatge, Yoern, Looking back, looking forward: Anatol, Lothar and Martin ten years later, 09Dec2009. <https://www.air-worldwide.com/publications/air-currents/looking-back-looking-forward-anatol-lothar-and-martin-ten-years-later/thejournal.ie>, The deadliest storms to evr hit Europe, 14Dec2015 0610AM, <https://www.thejournal.ie/europe-storms-2497164-Dec2015/>, accessed 10Dec2020

Toffoli J.M., J.M. Lefevre, J. Montbaliu, H. Savina, E. Bitner-Gregersen, Freak waves: Clues for prediction in ship accidents? Proceedings of the Thirteenth (2003) International Offshore and Polar Engineering Conf. Honolulu, Hawaii, USA, May 25-30,2003, The International Society of Offshore and Polar Engineers

Toffoli, J.M. Lefevre, E. Bitner-Gregersen, J. Monbaliu, Towards the identification of warning criteria: Analysis of a ship accident database, *Applied Ocean Research*, 27, 281-291, 2005

UKMO, Daily Weather Summary, 26Nov1999 to 05Dec1999

Ulbrich U, AH Fink, M Klawa, JG Pinto, Three extreme storms over Europe in December 1999, *Weather* 56, 70-80, 2001

UN/ECE Timber Committee, Chapter 3. Effects of the December 1999 storms on European timber markets, ECE/FAO Forest Products Annual Market Review, 1999-2000, 15pp, 2000, Timber Bulletin, Vol LIII, ECE/TIM/BULL/53/3 [pdf document properties: title=3stormdamageFIN.PDF; author=najera; datestamp=15/08/2000] <https://www.unece.org/fileadmin/DAM/timber/docs/rev-00/rev00.htm>

University of Wyoming, <http://weather.uwyo.edu/upperair/sounding.html>, last access 14Sep2021

Vedin, Haldo and Hans Alexandersson, Aarhunderadets storm? Vaader och Vatten, p.18, Dec, 1999

Voldberg Henrik, Vredens julemaaned, *Vejret*, 82, no.1, 1-7, Feb, 2000.

von Storch, Hans and Katja Woth, Storm surges: perspectives and options, *Sustain Sci*, 3, 33-43, 2008

XWS, Extreme Wind Storms Catalogue, <http://www.europeanwindstorms.org/cgi-bin/storms/storms.cgi>, accessed 06Sep2020

Wagenaar JW, PJ Eecen, Measurements of wind, wave and currents, OWEZ\_R\_122\_Wave\_20050701\_200812131, ECN-E--09-015, December 2009

Whitehouse, P., Wave Phenomenon in the North Sea, *The Marine Observer*, XLVII, No. 257, pp.128-129, July 1977 (Met.O. 904)

Wikipedia, Orkan Anatol, [https://de.wikipedia.org/wiki/Orkan\\_Anatol](https://de.wikipedia.org/wiki/Orkan_Anatol), accessed 18Apr2021

Williams, M.O., Wave mapping in UK waters, Prepared by PhysE for the Health and Safety Executive 2005, Research Report 392

Winther-Jensen, M and ER Jorgensen, When real life wind speed exceeds design wind assumptions, 1999 European Wind Energy Conference, 1-5 March 1999, Nice, France pp.220-223.

Woetmann Nielsen, AN, DMI-HIRLAM's forudsigelse af orkanen den 3.december 1999. *Vejret*, 82, pp. 19-23, februar 2000.

Woetmann Nielsen N and B Hansen Sass, A numerical, high-resolution study of the life cycle of the severe storm over Denmark on 3Dec1999, *Tellus*, 55A, 338-351, 2003.

World Energy Council, Case Study Series, Extreme Weather, Windstorms France December 1999, [https://www.worldenergy.org/assets/downloads/Windstorms\\_France\\_-Extreme\\_weather\\_conditions\\_SEP\\_2019.pdf](https://www.worldenergy.org/assets/downloads/Windstorms_France_-Extreme_weather_conditions_SEP_2019.pdf), pdf date stamp: 11Oct2019
